# Supplementary material for: Total synthesis of mycobacterial arabinogalactan containing 92 monosaccharide units
Source: PubMed Central journal article supplement (PMC5357306; doi:10.1038/ncomms14851), 2017-03-16
Supplement: ncomms14851-s1.pdf [file ncomms14851-s1.pdf]

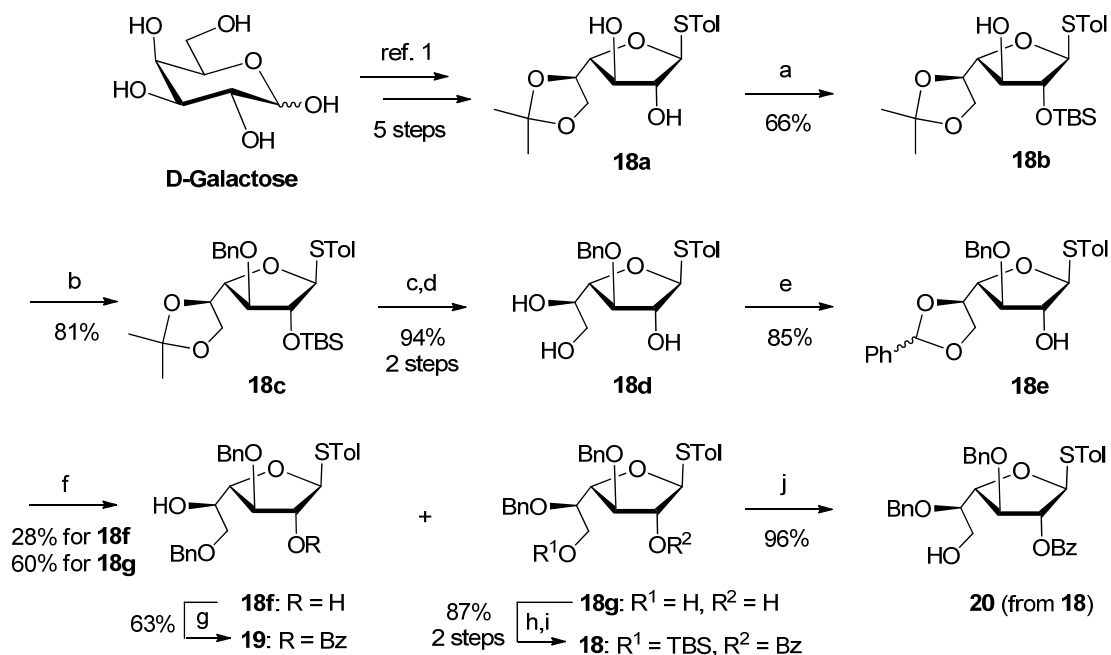

**Supplementary Figure 1. Synthesis of galactofuranosyl building blocks 18–20.**

Regents and conditions: (a) TBSCl, imidazole, CH<sub>2</sub>Cl<sub>2</sub>, 0 °C, 66%; (b) BnBr, NaH, DMF, 0 °C to r.t., 81%; (c) TBAF, THF; (d) AcOH/H<sub>2</sub>O (7:3), 50 °C, 94% over two steps; (e) PhCH(OMe)<sub>2</sub>, PPTS, DMF, 60 °C, 85%; (f) DIBAL-H, CH<sub>2</sub>Cl<sub>2</sub>/Toluene (1:1), -40 °C, 88% (**18f** : **18g** = 1 : 2.1); (g) Bz<sub>2</sub>O, DMAP, pyridine, 63%; (h) TBSCl, imidazole, CH<sub>2</sub>Cl<sub>2</sub>, 0 °C; (i) BzCl, DMAP, pyridine, 87% over two steps; (j) HF-pyridine, THF/H<sub>2</sub>O (10:1), 35 °C, 96%.

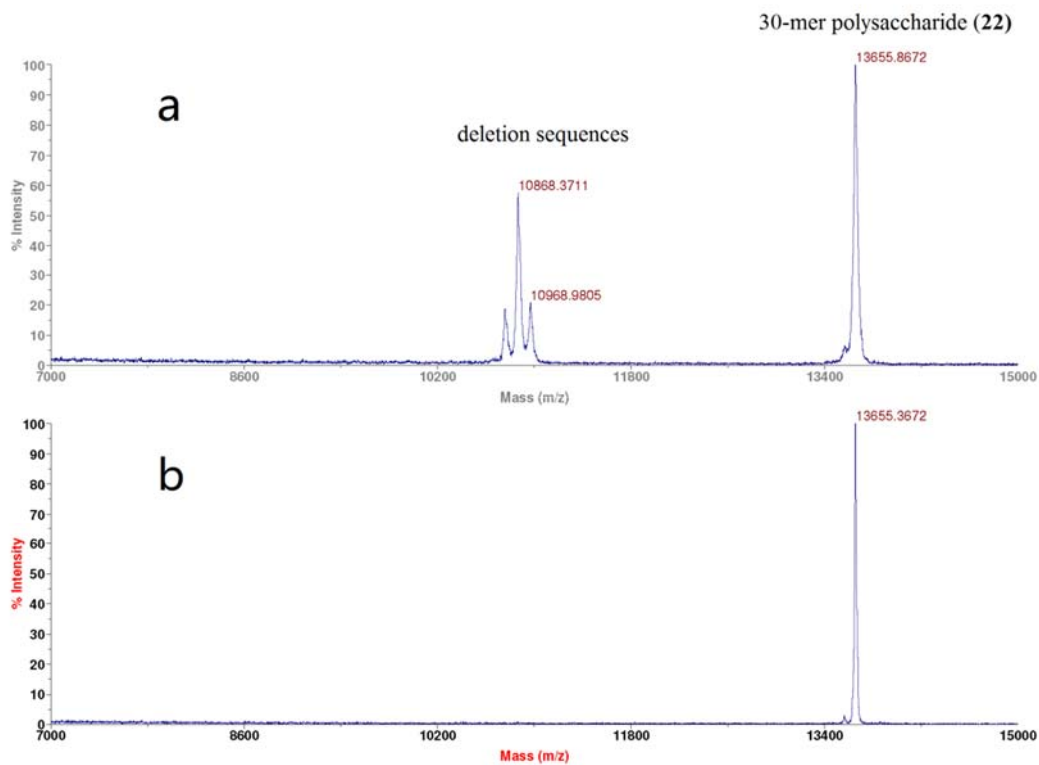

**Supplementary Figure 2. MALDI-TOF mass spectra of 30-mer polysaccharide (22) before and after purification by size exclusion chromatography. a, Some deletion sequences were difficult to be removed by column chromatography on silica gel; b, All deletion sequences were removed by size exclusion chromatography to obtain the pure 30-mer polysaccharide (22).**

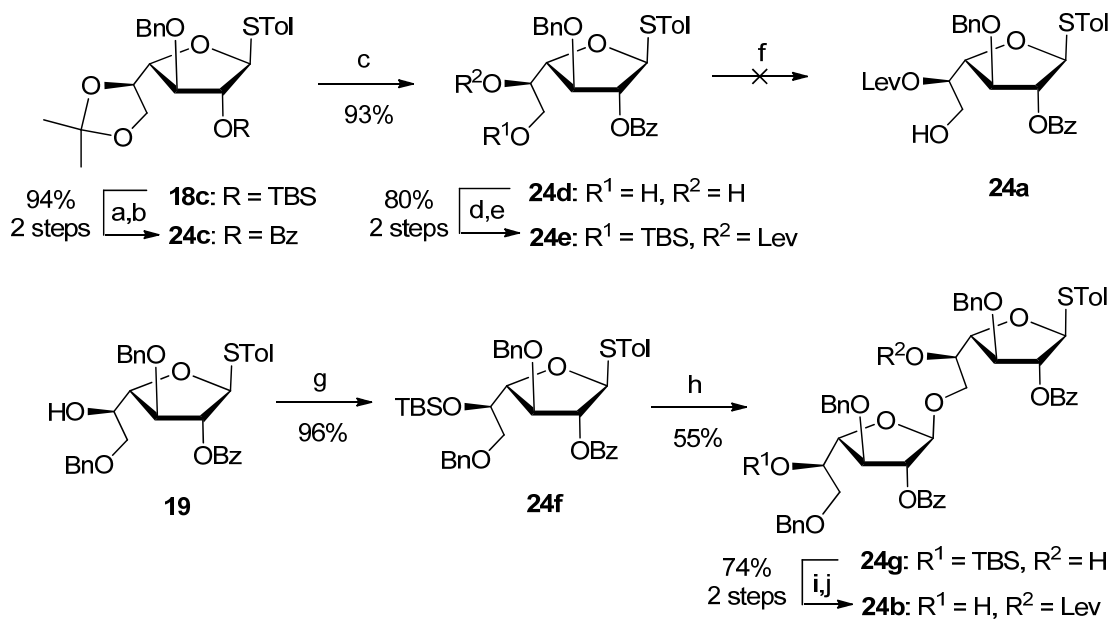

### Supplementary Figure 3. Synthesis of galactofuranosyl building block 24b.

Regents and conditions: (a) TBAF, THF; (b) BzCl, DMAP, pyridine, 94% over two steps; (c) AcOH/H<sub>2</sub>O (7:3), 50 °C, 93%; (d) TBSCl, imidazole, CH<sub>2</sub>Cl<sub>2</sub>, 0 °C; (e) Levulinoyl acid, EDC·HCl, DMAP, CH<sub>2</sub>Cl<sub>2</sub>, 80% over two steps; (f) HF-pyridine, THF/H<sub>2</sub>O (10:1), 35 °C; (g) TBSCl, imidazole, CH<sub>2</sub>Cl<sub>2</sub>, reflux, 96%; (h) *p*-TolSCl, AgOTf, TTBP, then **24d**, 4 Å MS, CH<sub>2</sub>Cl<sub>2</sub>, -78 °C, 55%; (i) Levulinoyl acid, EDC·HCl, DMAP, CH<sub>2</sub>Cl<sub>2</sub>, 35 °C; (j) HF-pyridine, THF/H<sub>2</sub>O (10:1), 35 °C, 74% over two steps.

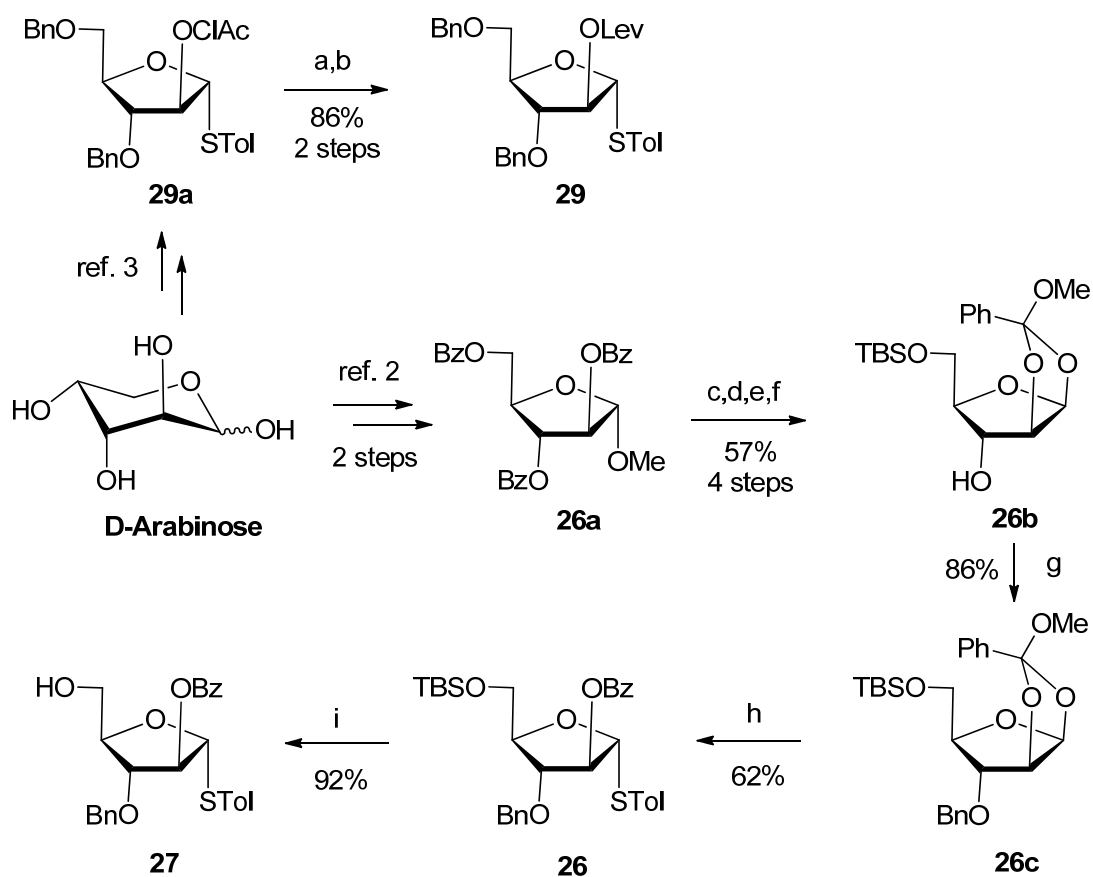

**Supplementary Figure 4. Synthesis of arabinofuranosyl building blocks 26, 27 and 29.** Regents and conditions: (a)  $\text{CH}_3\text{ONa}$ ,  $\text{CH}_3\text{OH}$ ; (b) Levulinoyl acid,  $\text{EDC}\cdot\text{HCl}$ , DMAP,  $\text{CH}_2\text{Cl}_2$ , 86% for two steps; (c)  $\text{AcBr}$ ,  $\text{CH}_3\text{OH}$ ,  $\text{CH}_2\text{Cl}_2$ ,  $0\text{ }^\circ\text{C}$  to r.t.; (d) 2,6-Lutidine,  $\text{CH}_3\text{OH}$ ,  $0\text{ }^\circ\text{C}$  to r.t.; (e)  $\text{CH}_3\text{ONa}$ ,  $\text{CH}_3\text{OH}$ ; (f)  $\text{TBSCl}$ , DMAP,  $\text{Et}_3\text{N}$ , pyridine, 57% for four steps; (g)  $\text{BnBr}$ ,  $\text{NaH}$ , DMF,  $0\text{ }^\circ\text{C}$ , 86%; (h)  $\text{SnCl}_4$ , *p*-TolSH, 4 Å MS,  $\text{CH}_2\text{Cl}_2$ ,  $0\text{ }^\circ\text{C}$ , 62%; (i) TBAF, AcOH, THF,  $35\text{ }^\circ\text{C}$ , 92%.

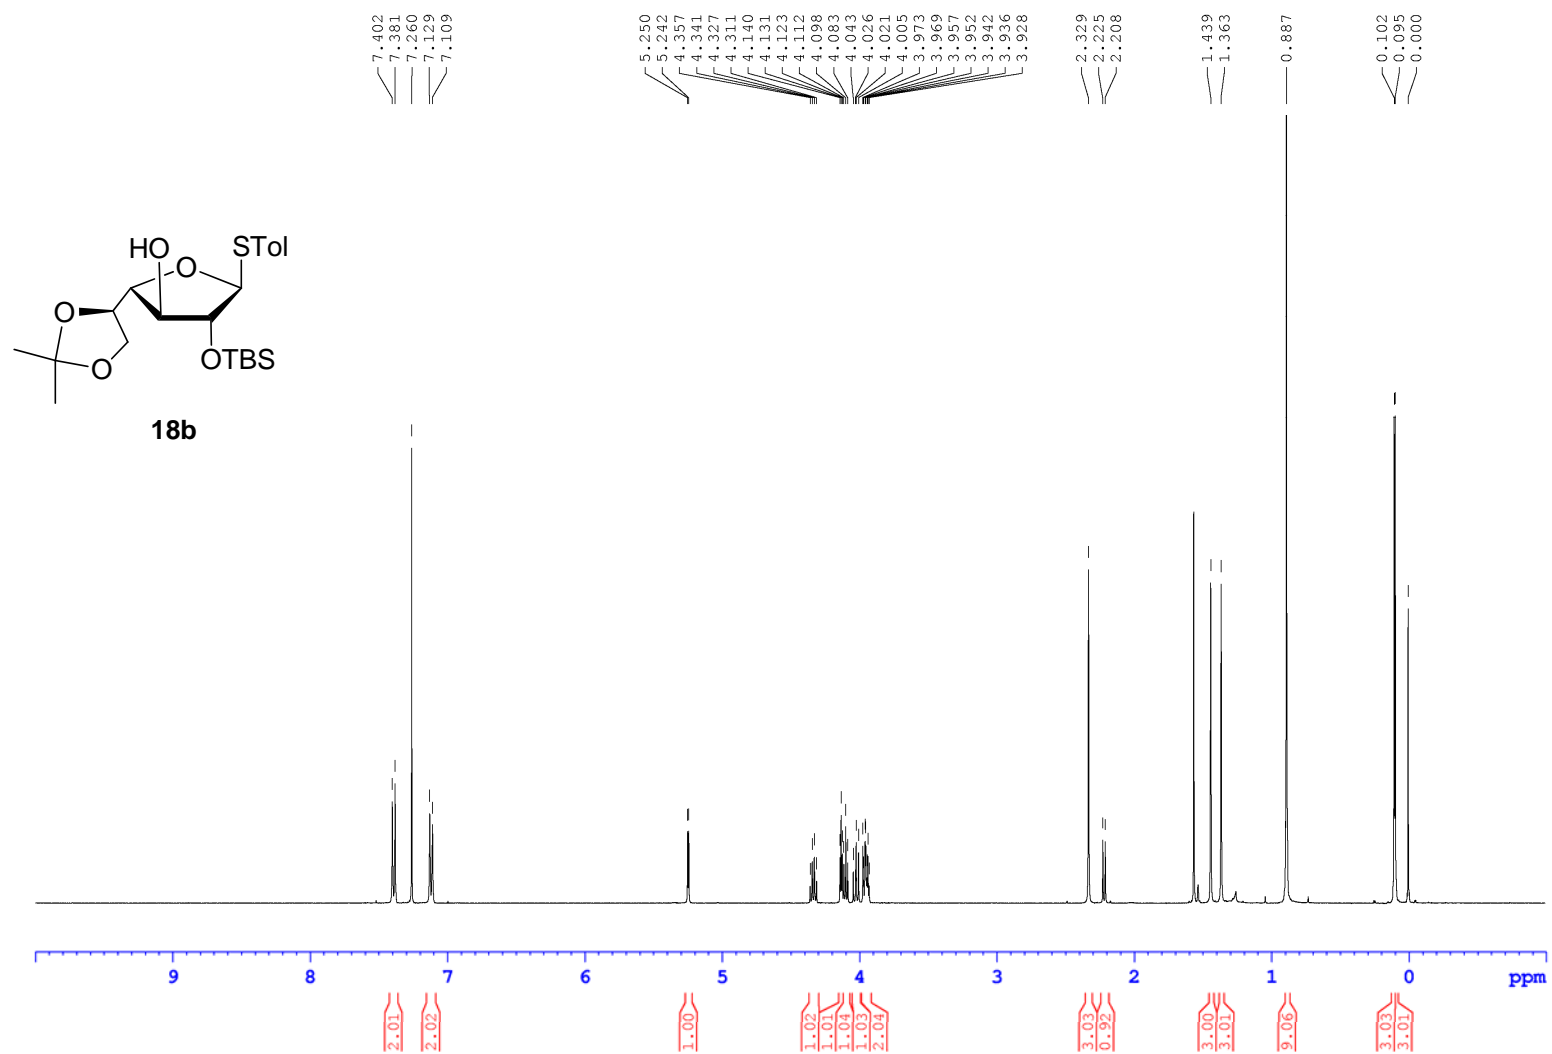

Supplementary Figure 5.  $^1\text{H}$  NMR spectrum of compound 18b

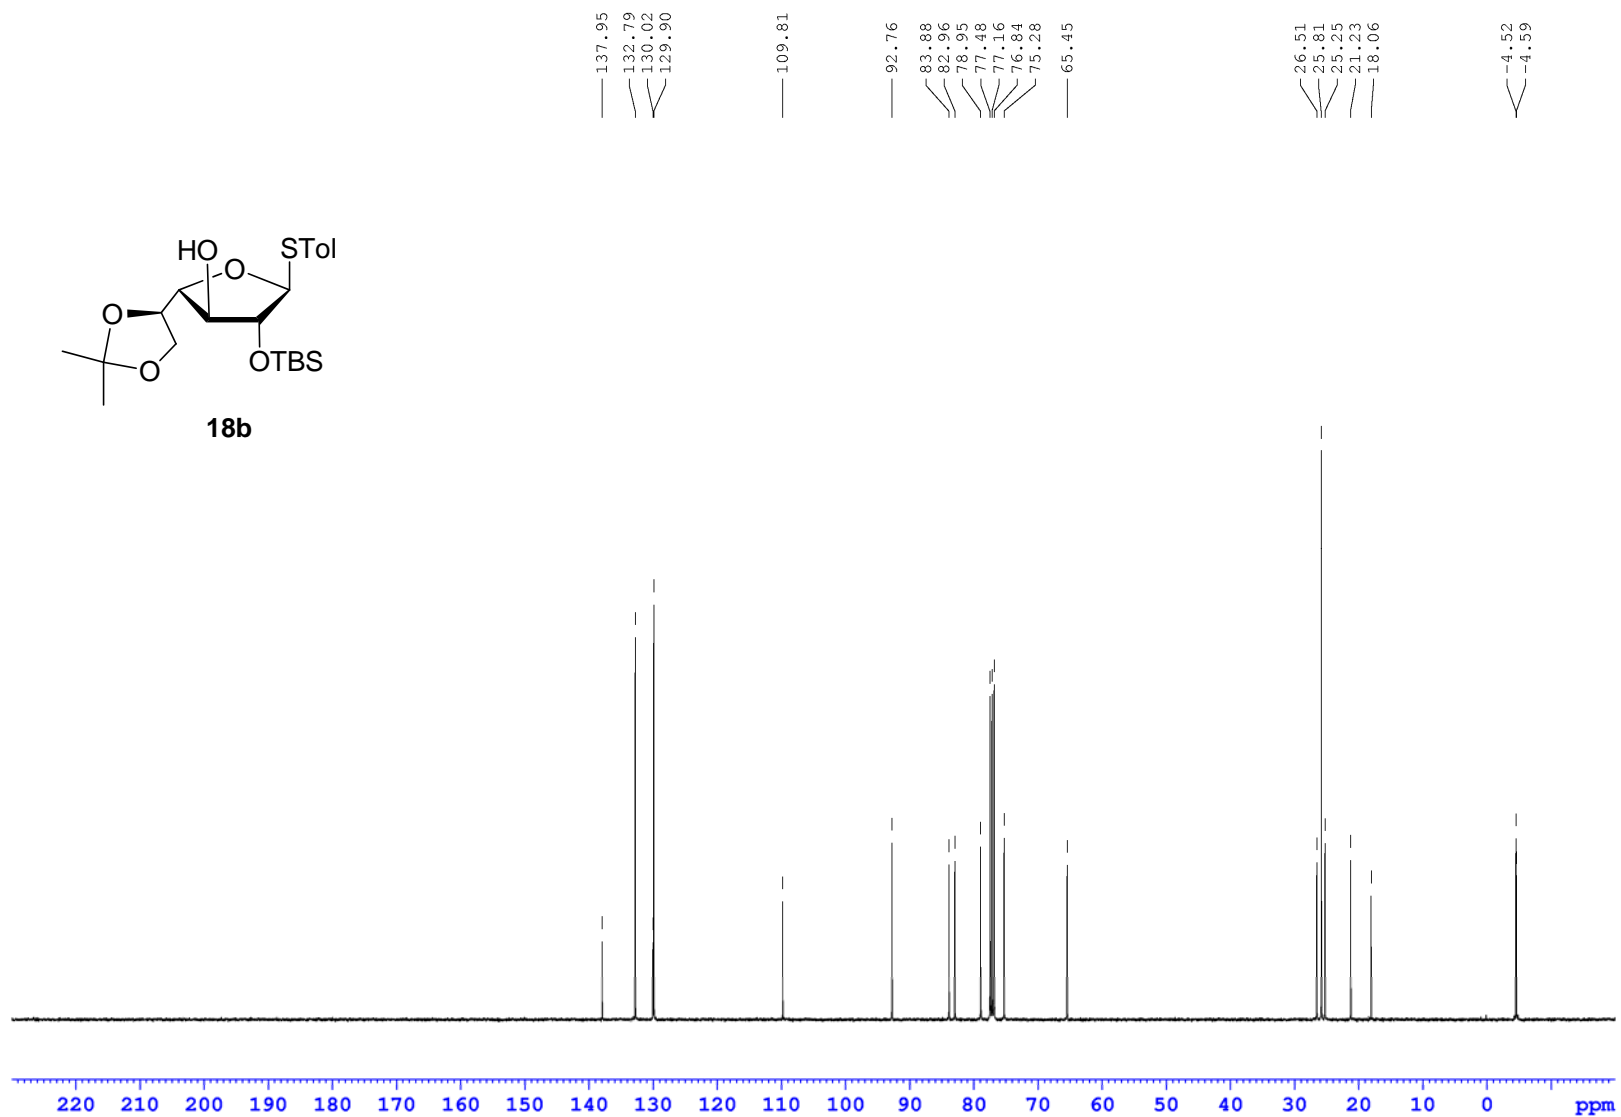

Supplementary Figure 6. <sup>13</sup>C NMR spectrum of compound 18b

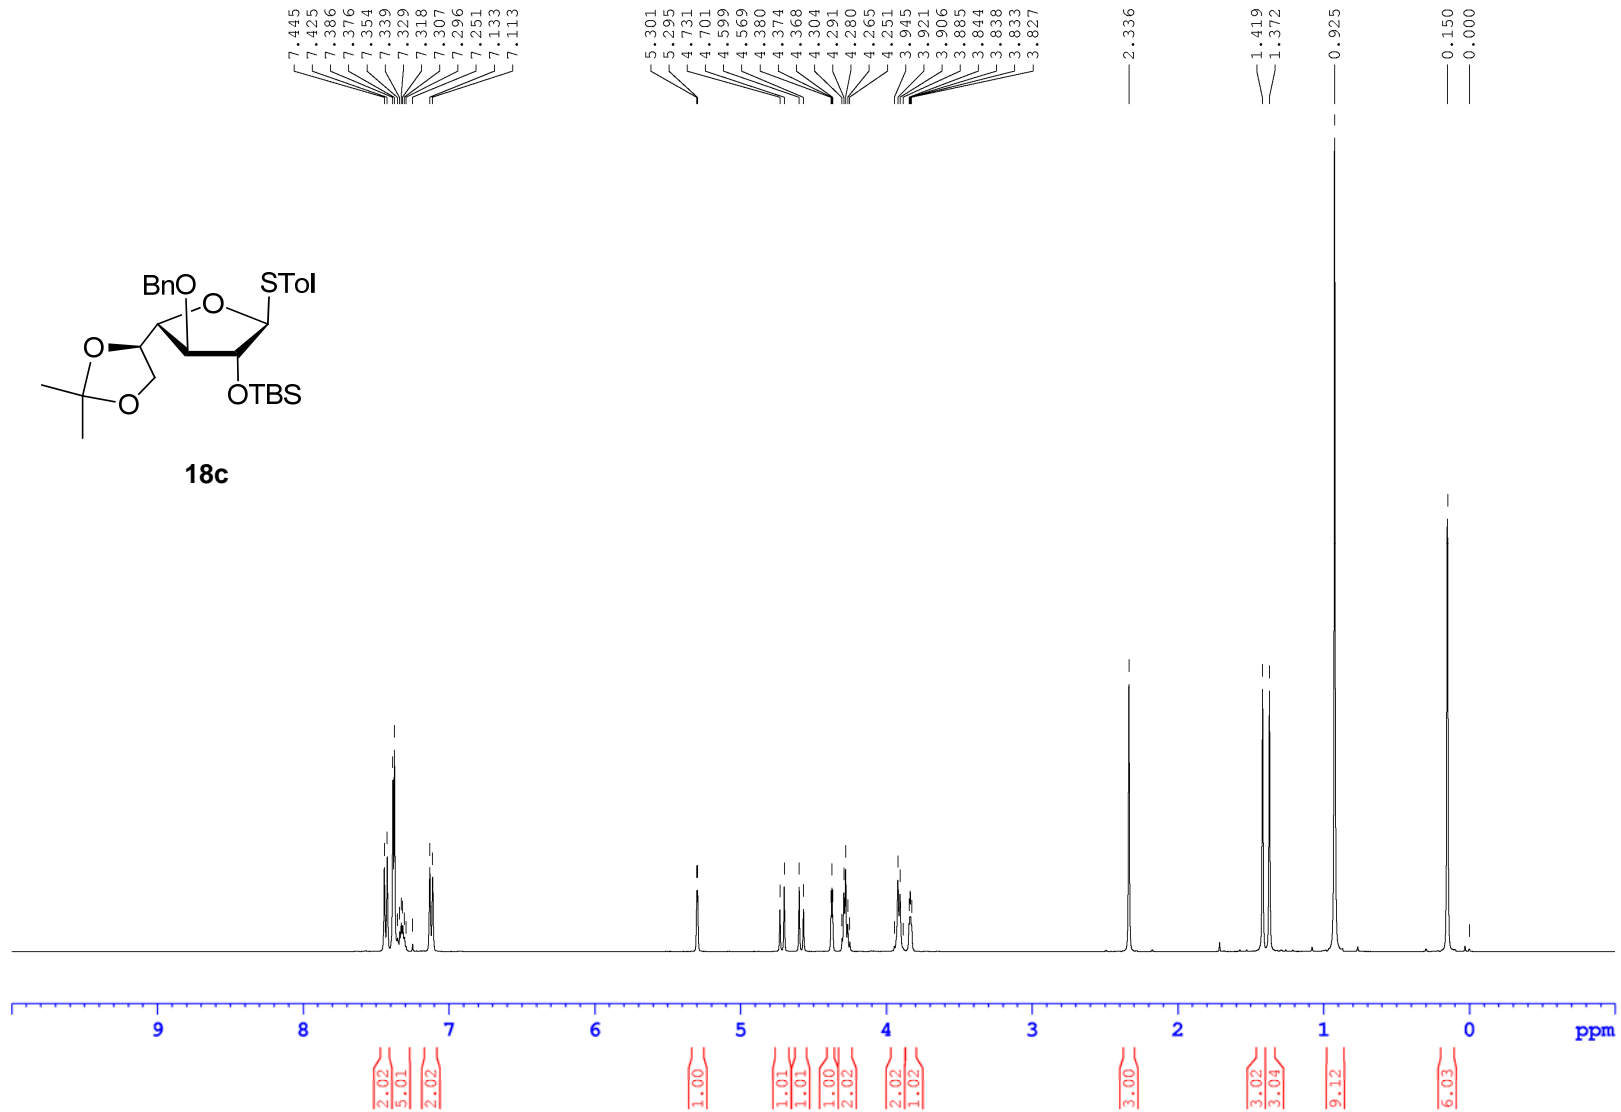

Supplementary Figure 7.  $^1\text{H}$  NMR spectrum of compound 18c





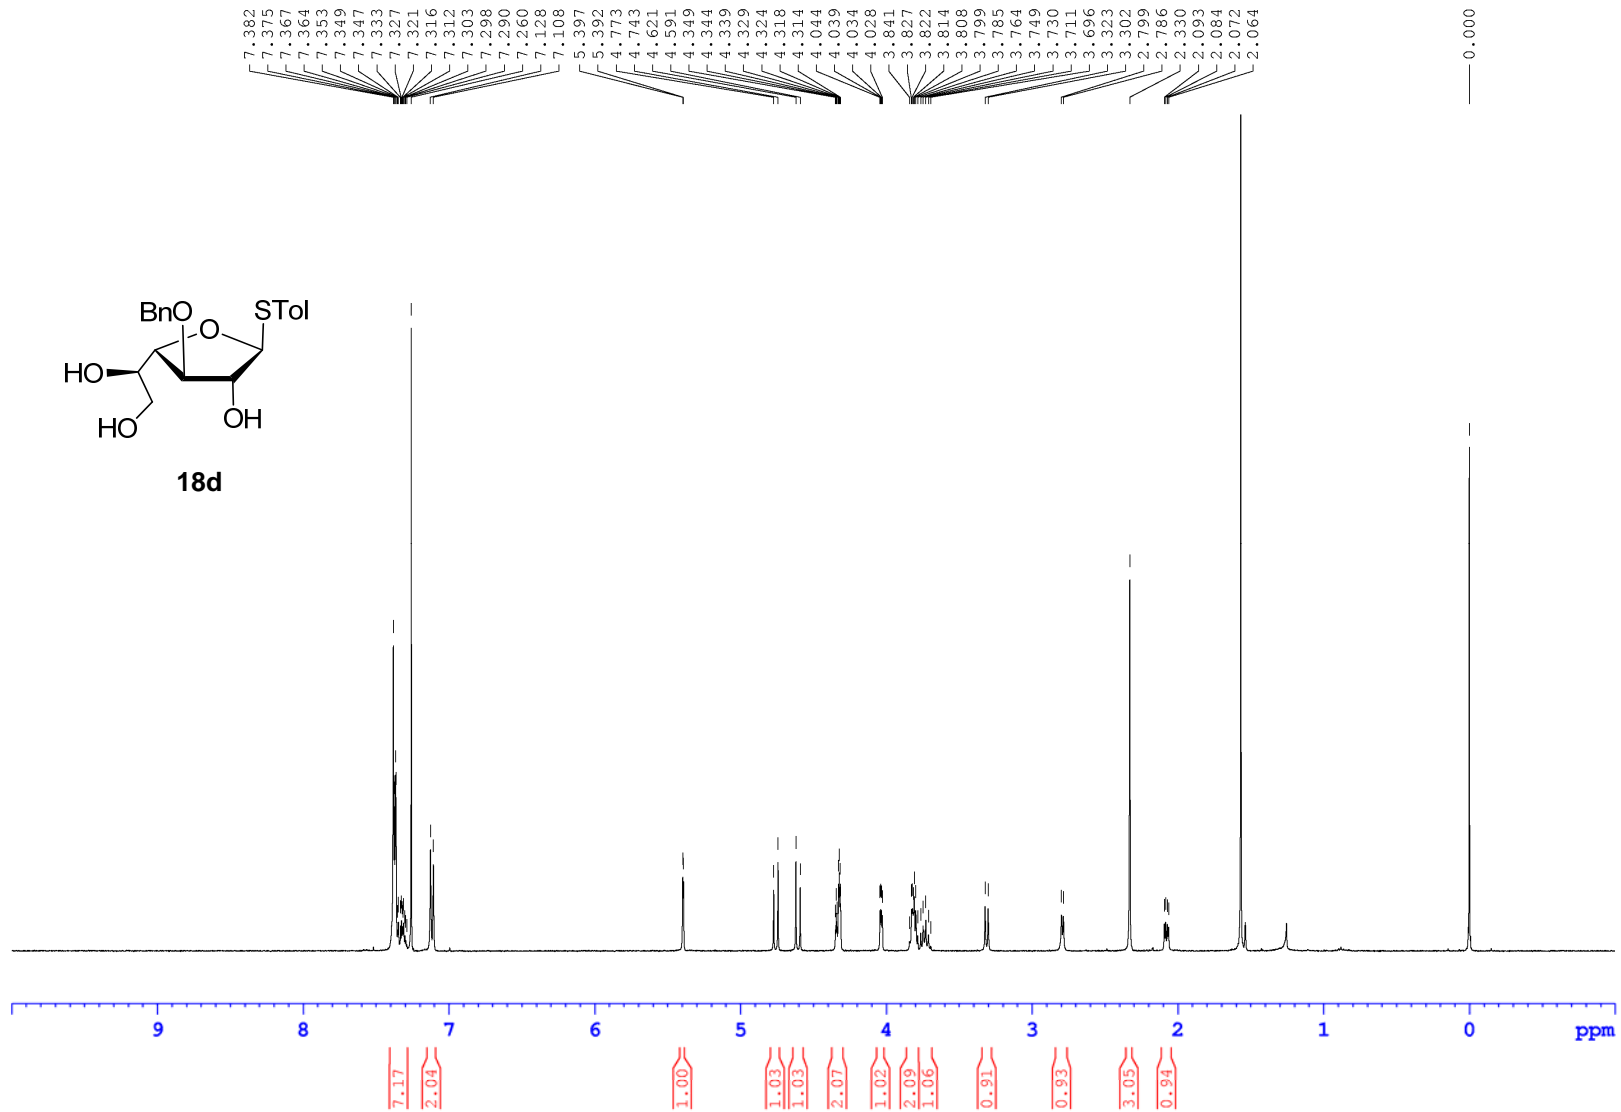

Supplementary Figure 9.  $^1\text{H}$  NMR spectrum of compound **18d**

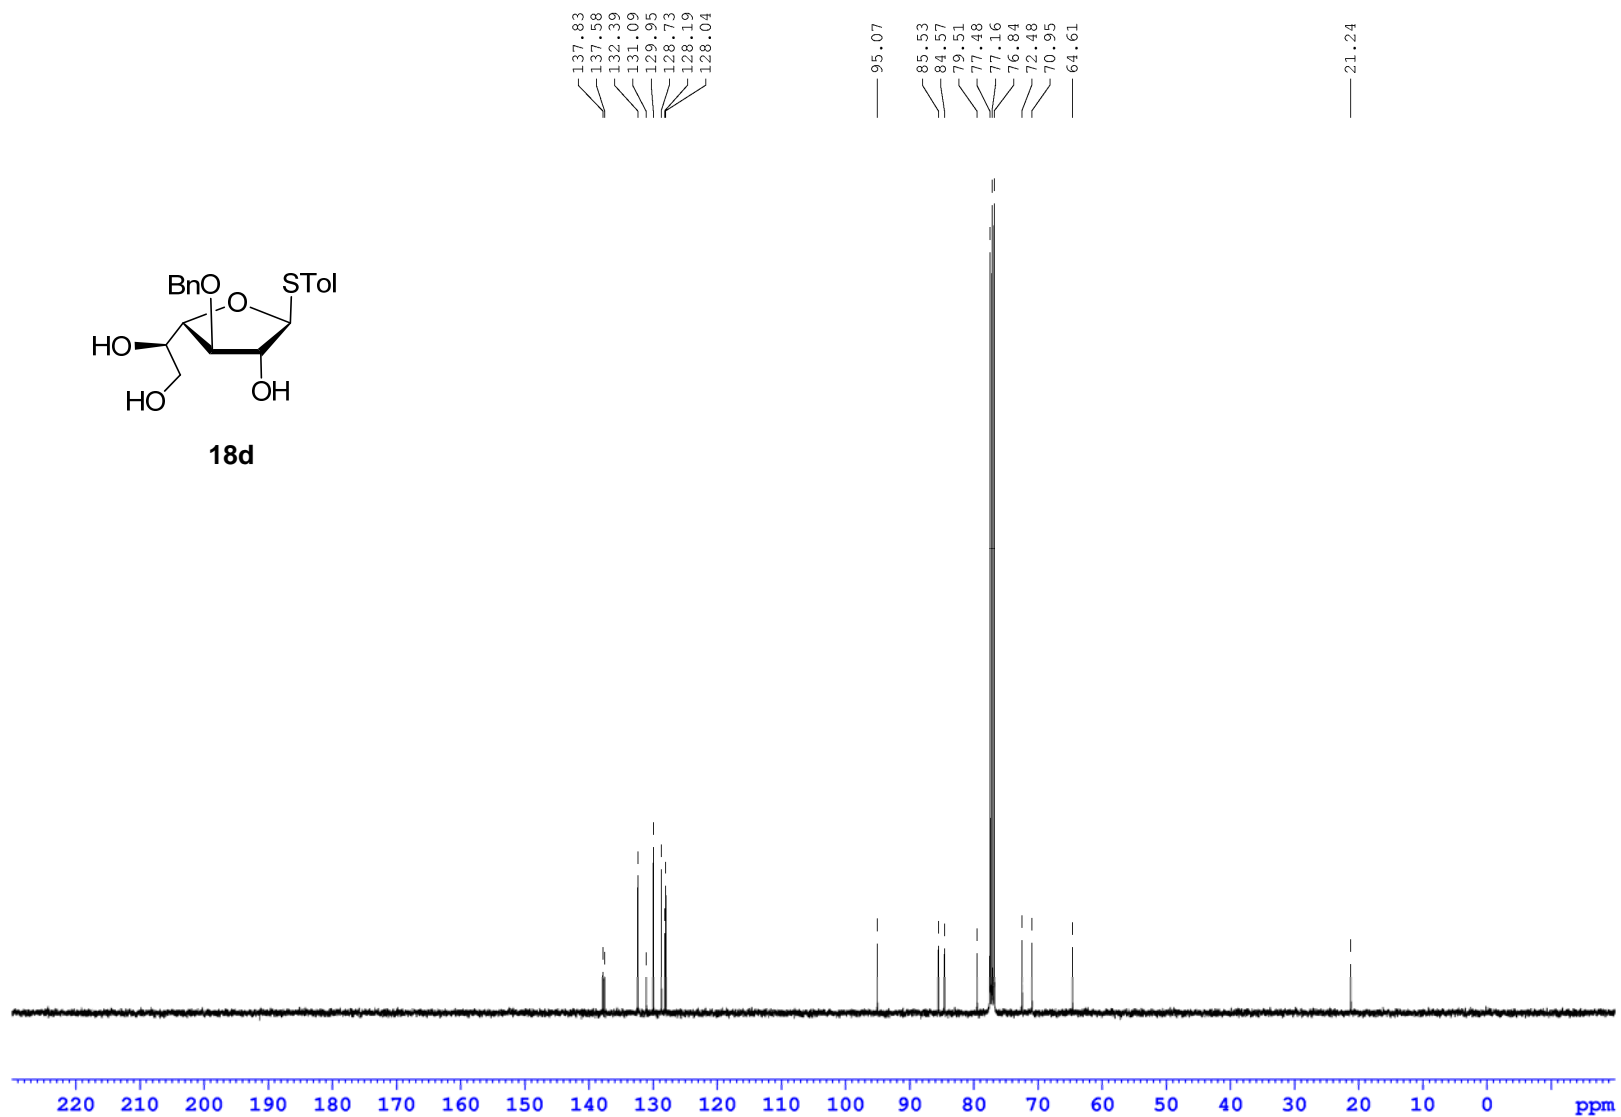

Supplementary Figure 10.  $^{13}\text{C}$  NMR spectrum of compound 18d

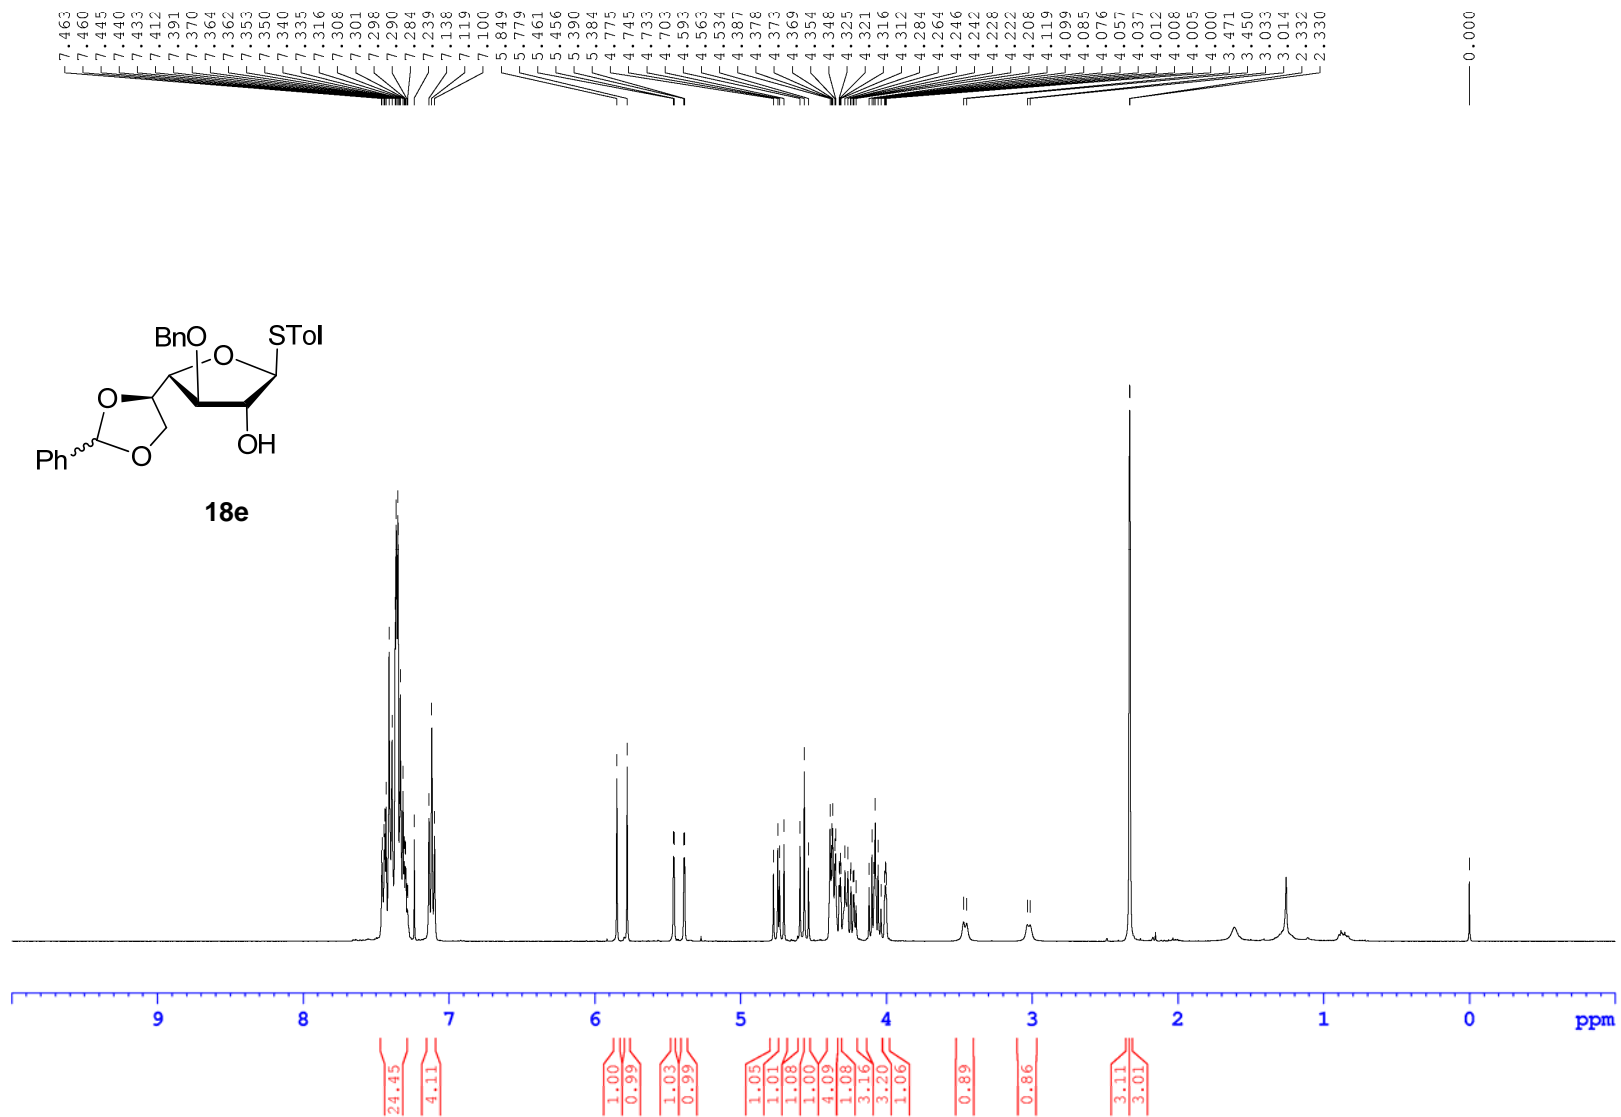

Supplementary Figure 11.  $^1\text{H}$  NMR spectrum of compound **18e**

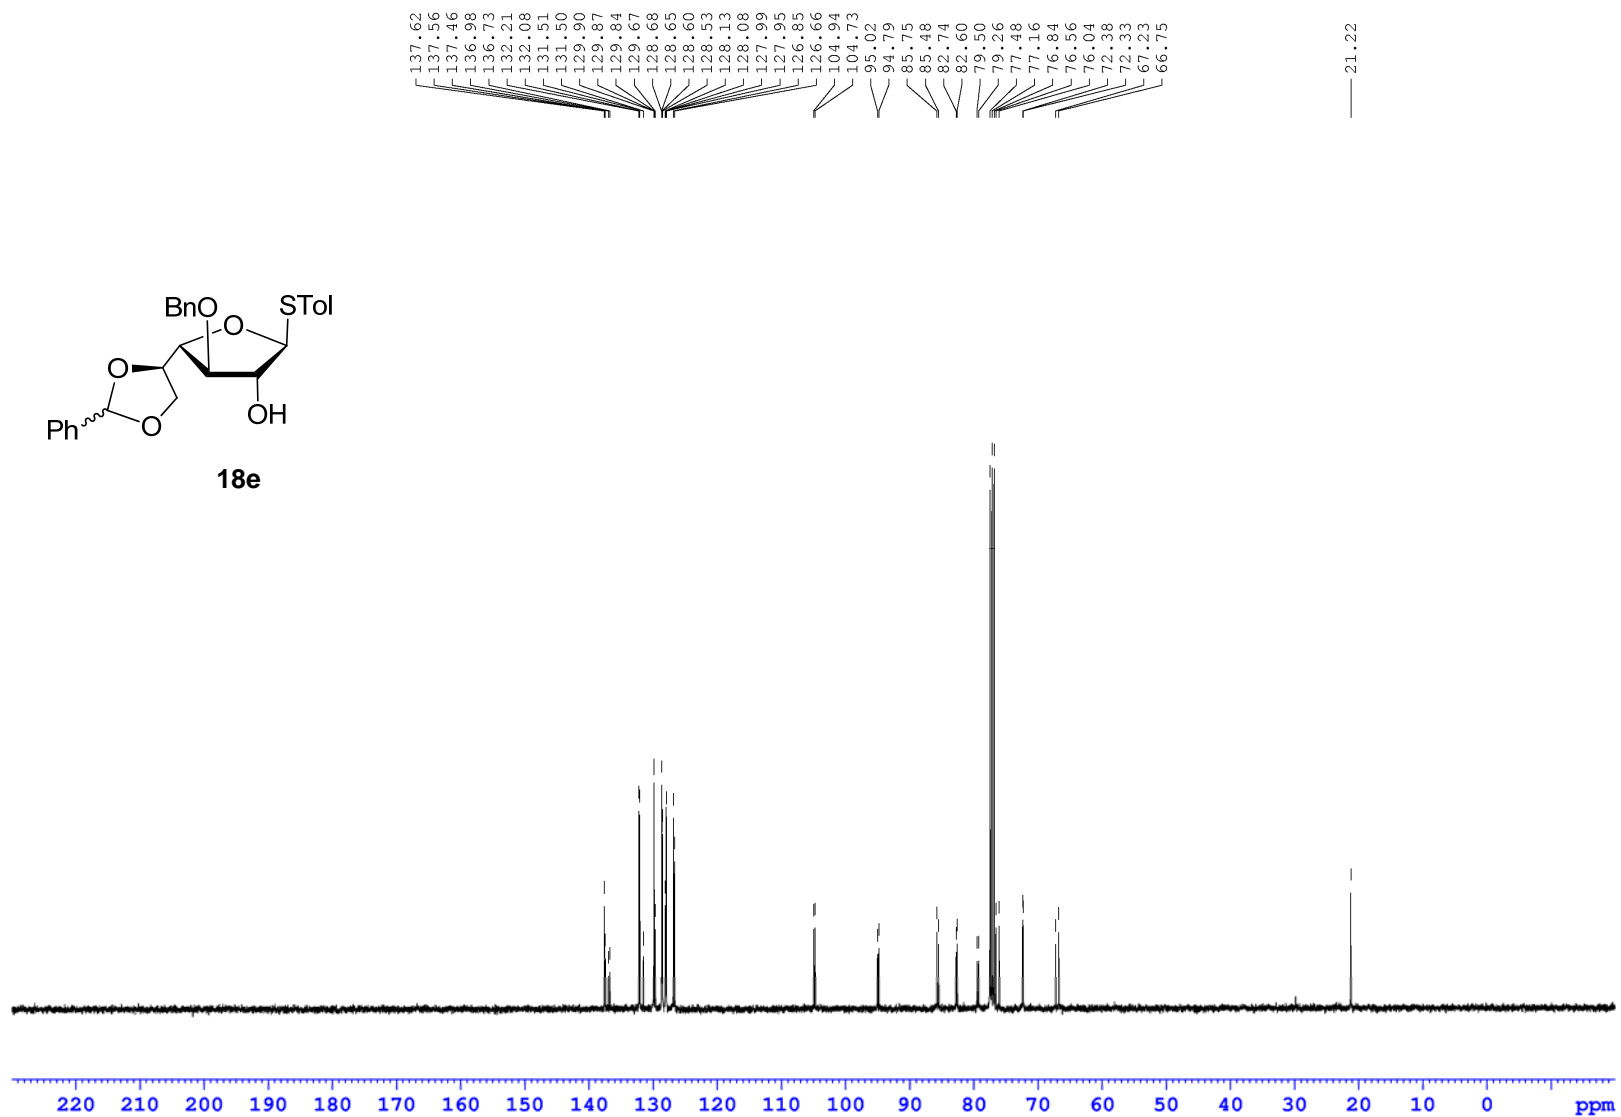

Supplementary Figure 12. <sup>13</sup>C NMR spectrum of compound 18e

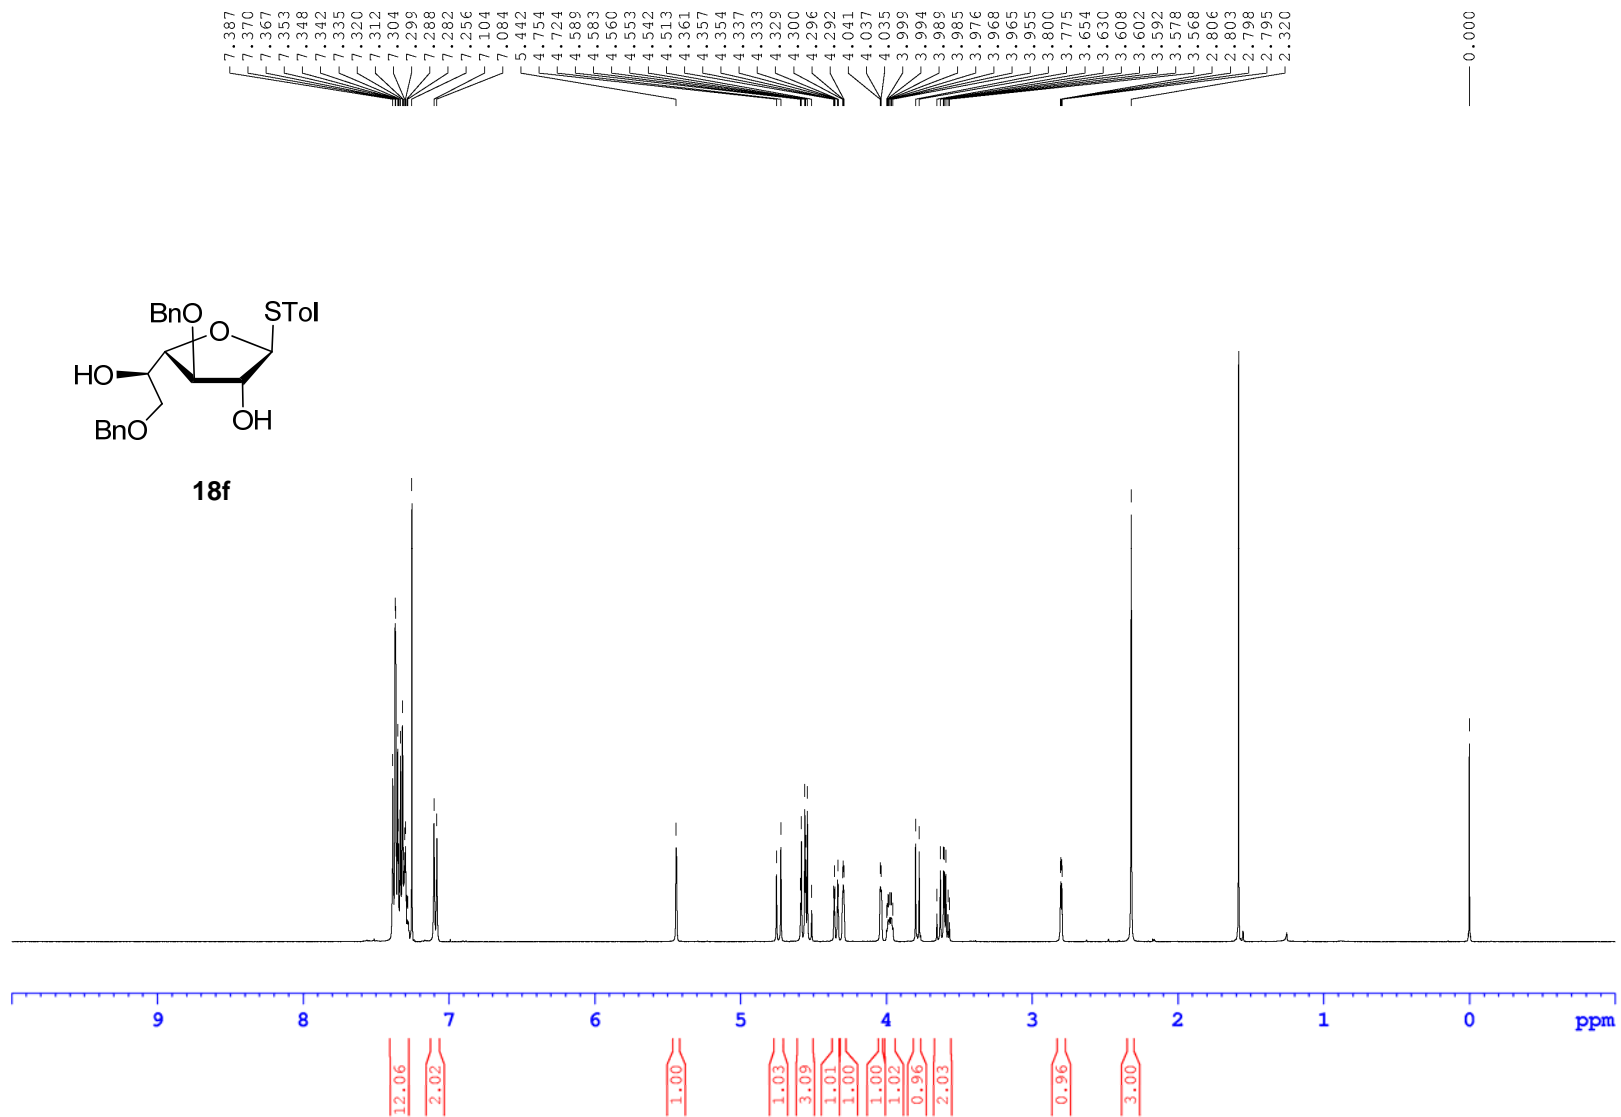

Supplementary Figure 13. <sup>1</sup>H NMR spectrum of compound 18f

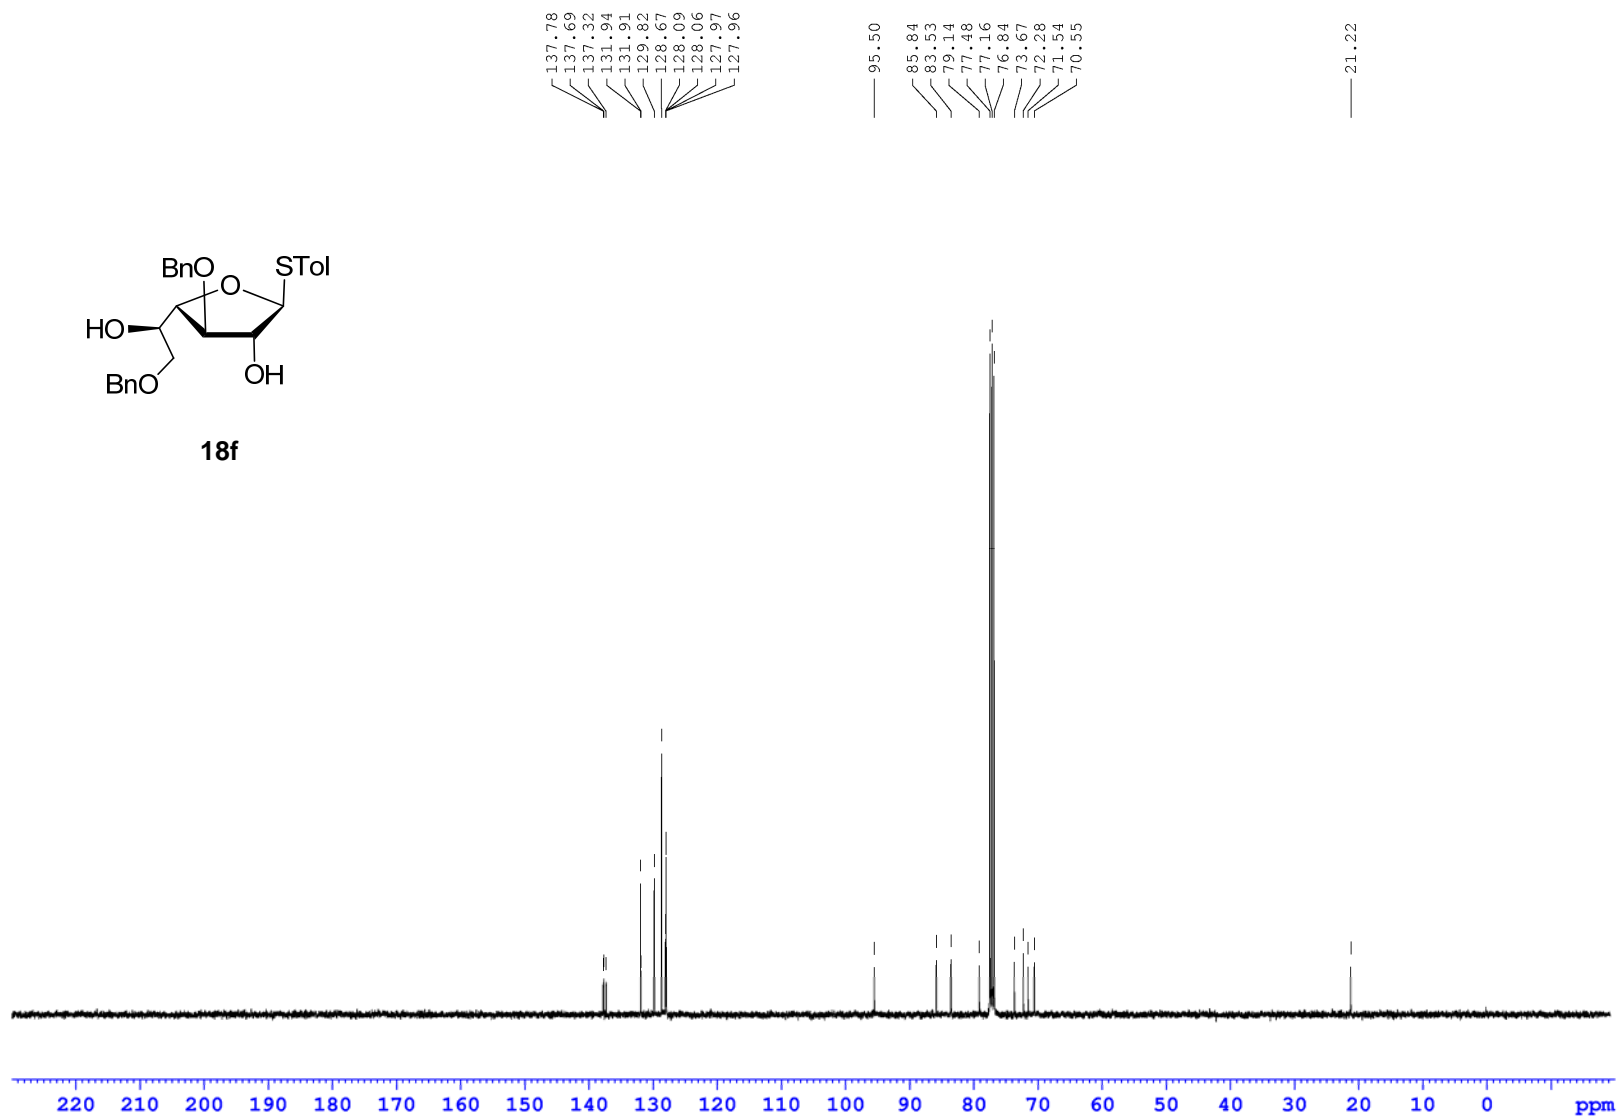

Supplementary Figure 14.  $^{13}\text{C}$  NMR spectrum of compound **18f**

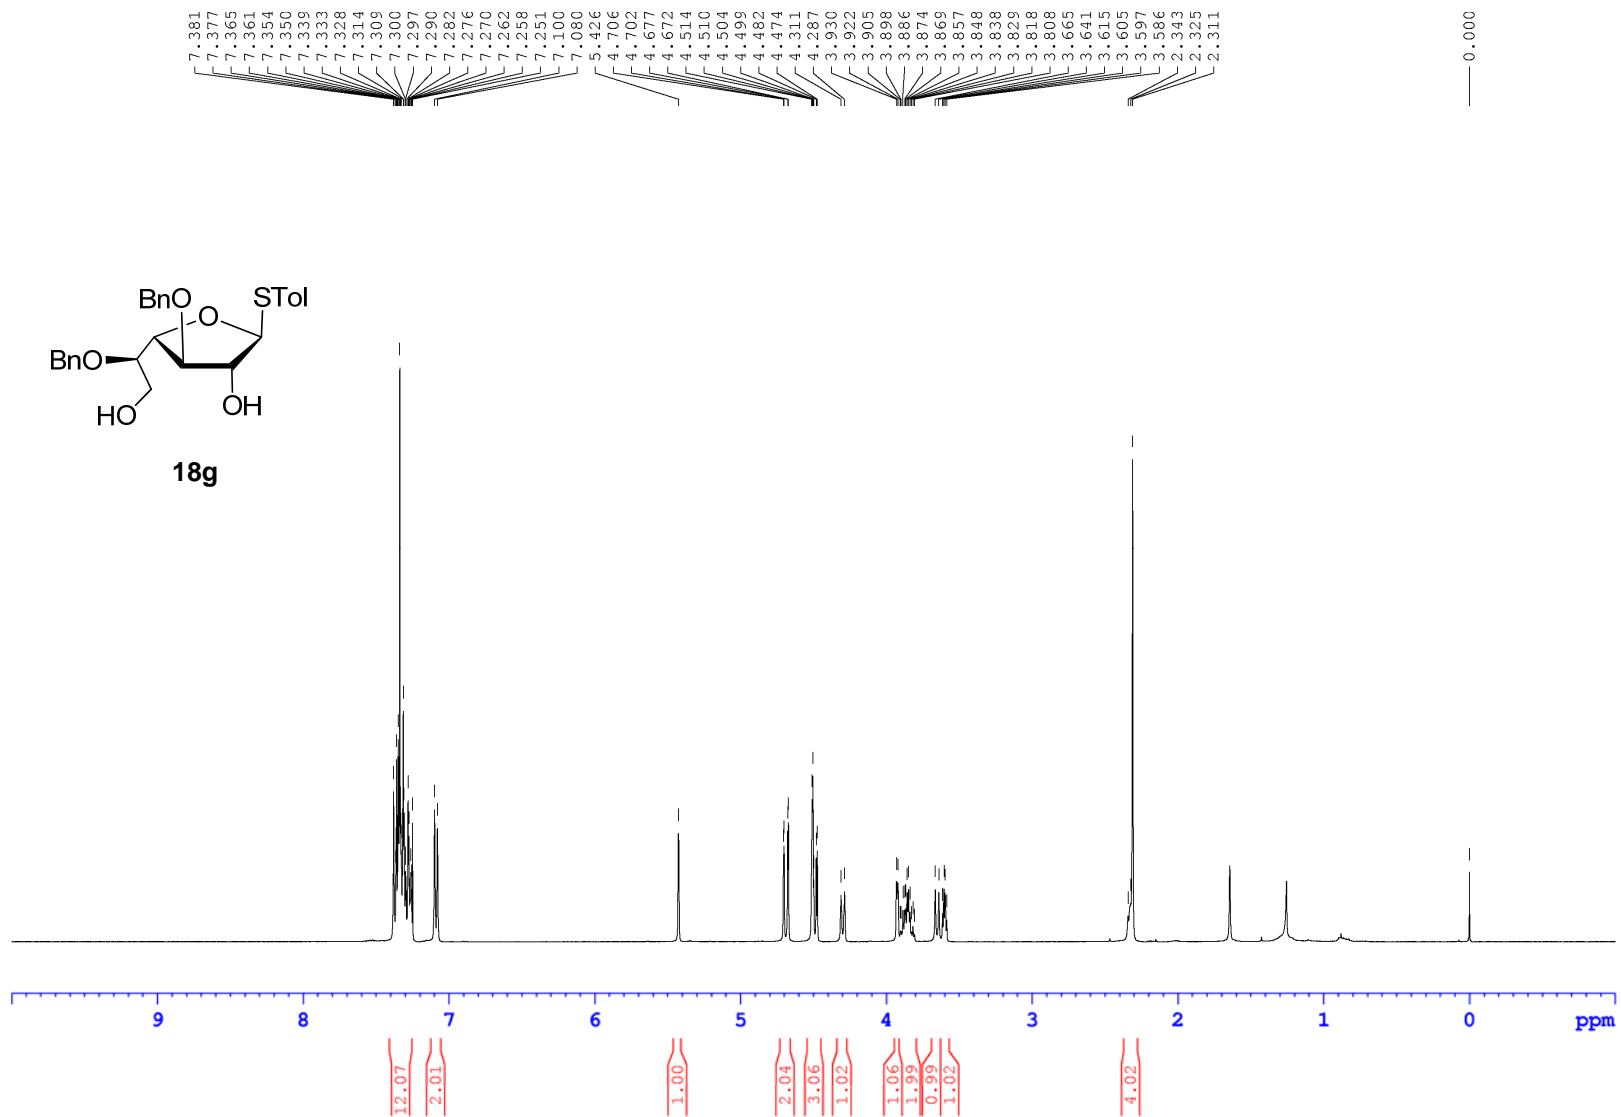

Supplementary Figure 15. <sup>1</sup>H NMR spectrum of compound 18g

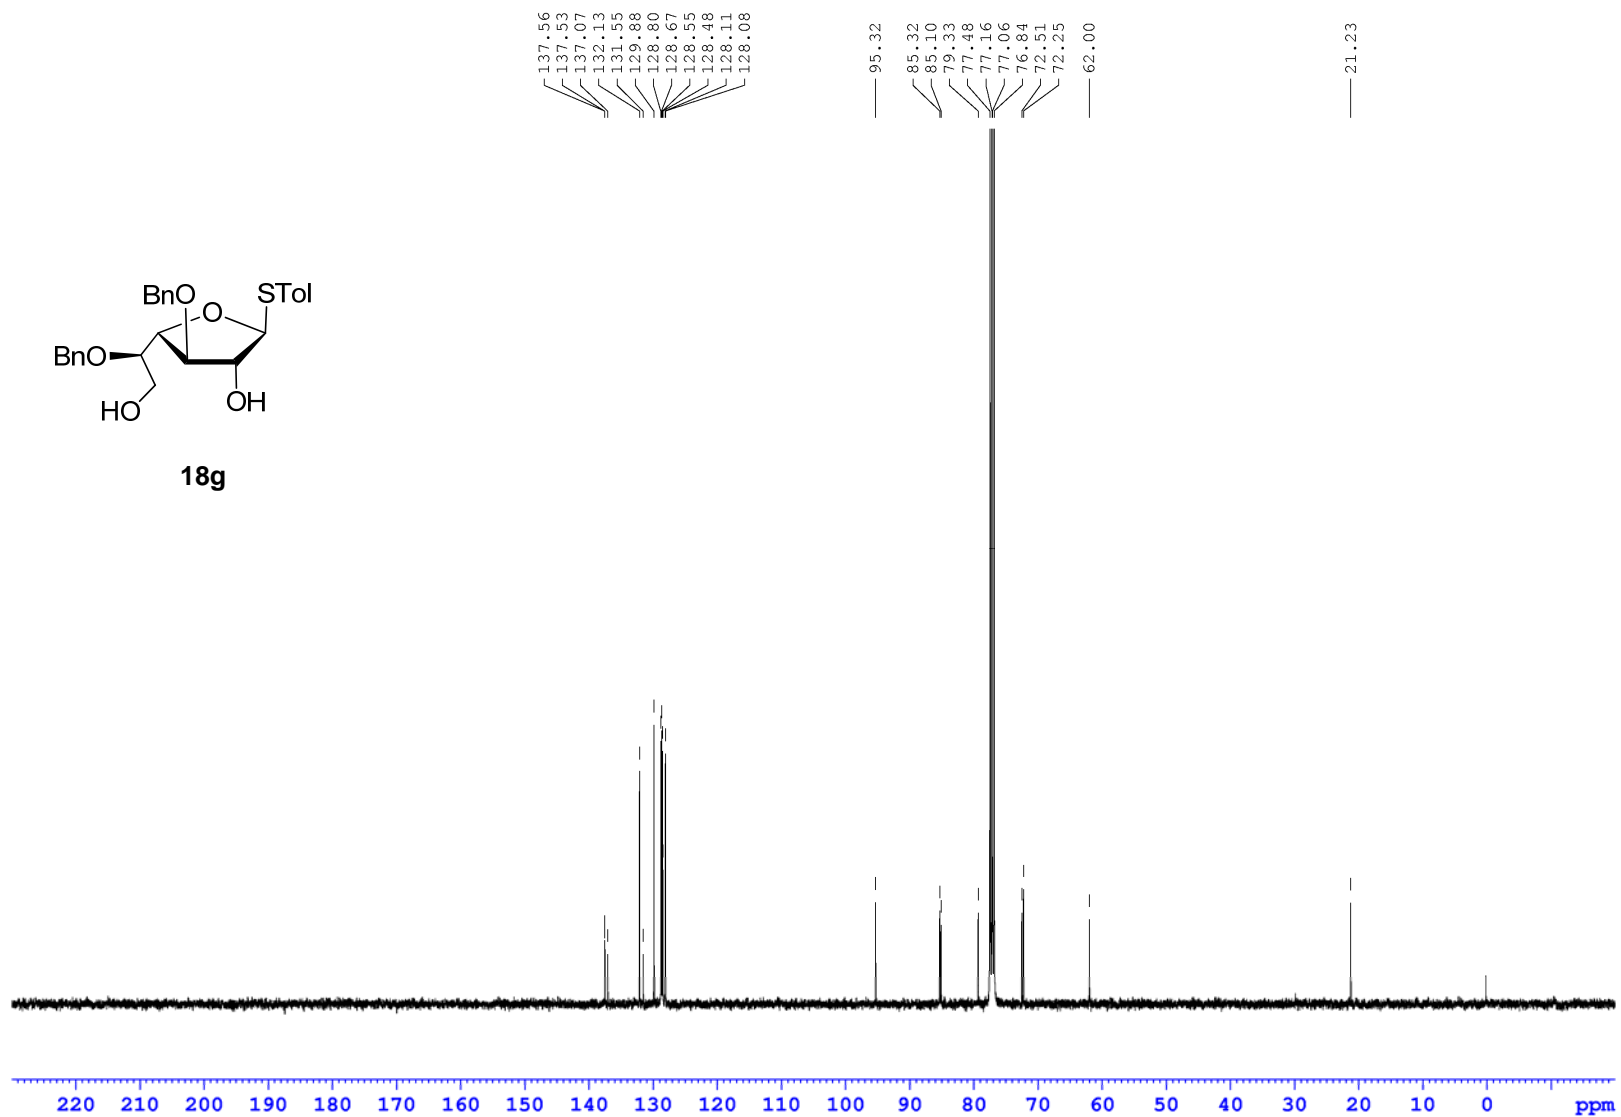

Supplementary Figure 16. <sup>13</sup>C NMR spectrum of compound 18g



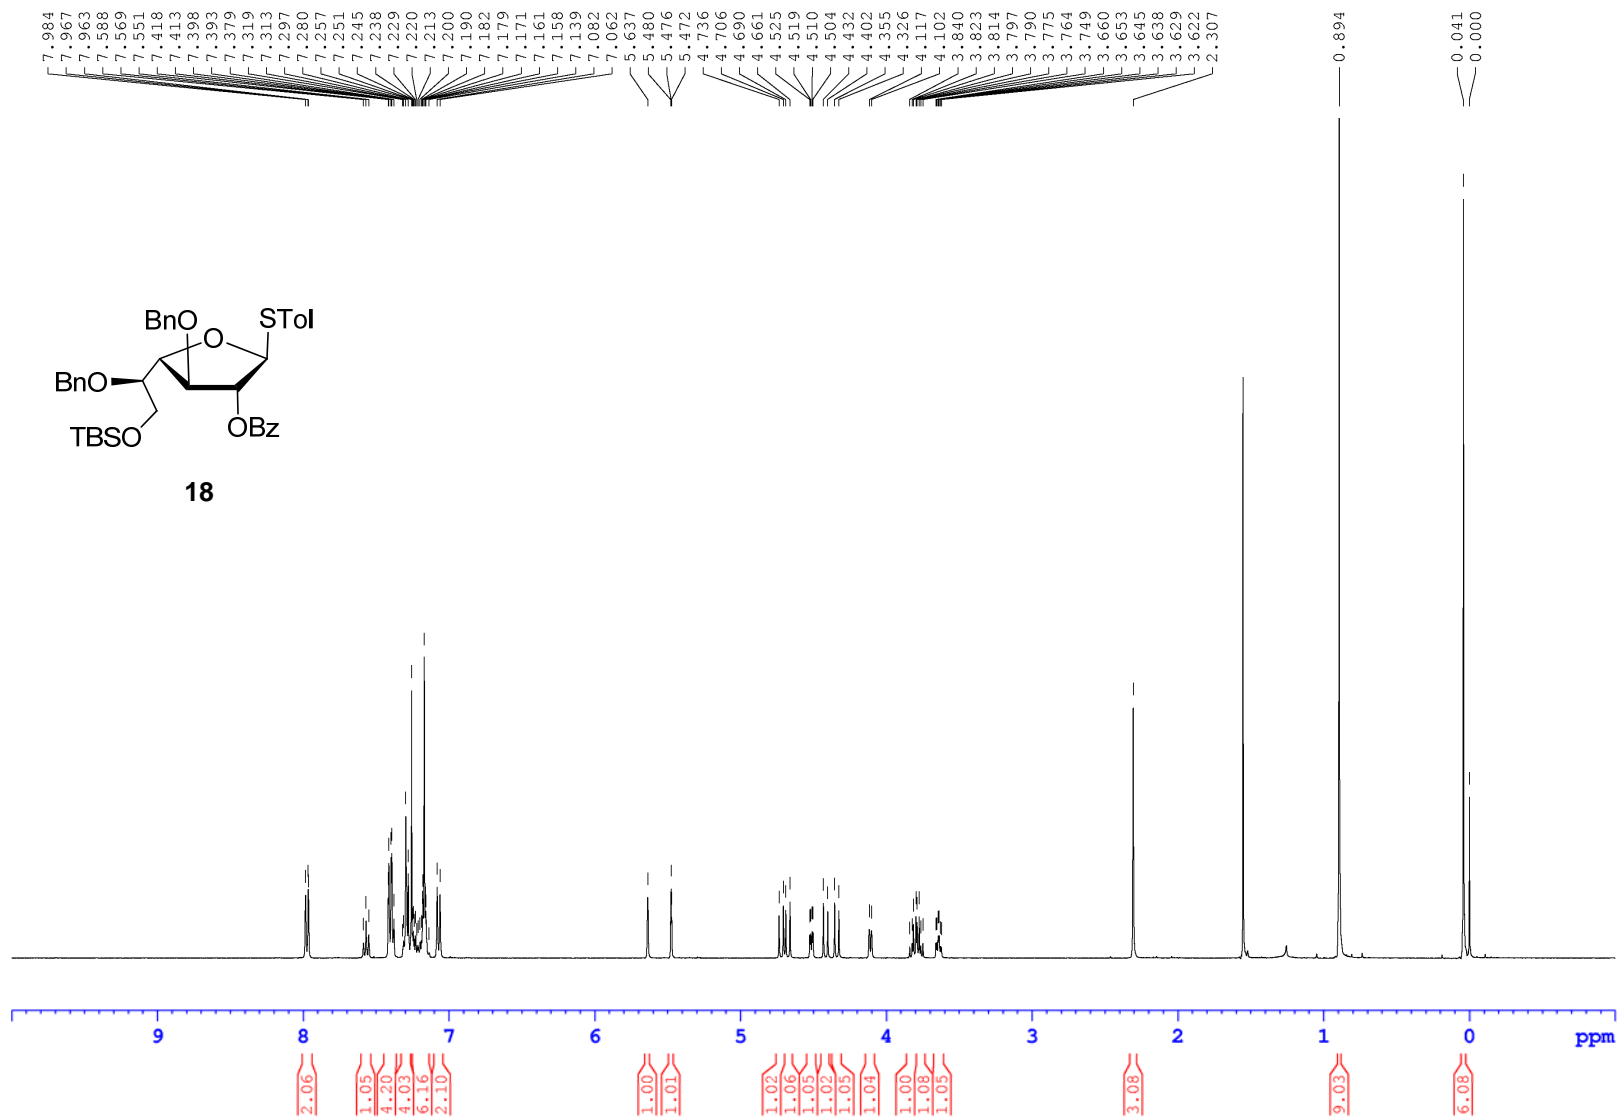

Supplementary Figure 17. <sup>1</sup>H NMR spectrum of compound 18

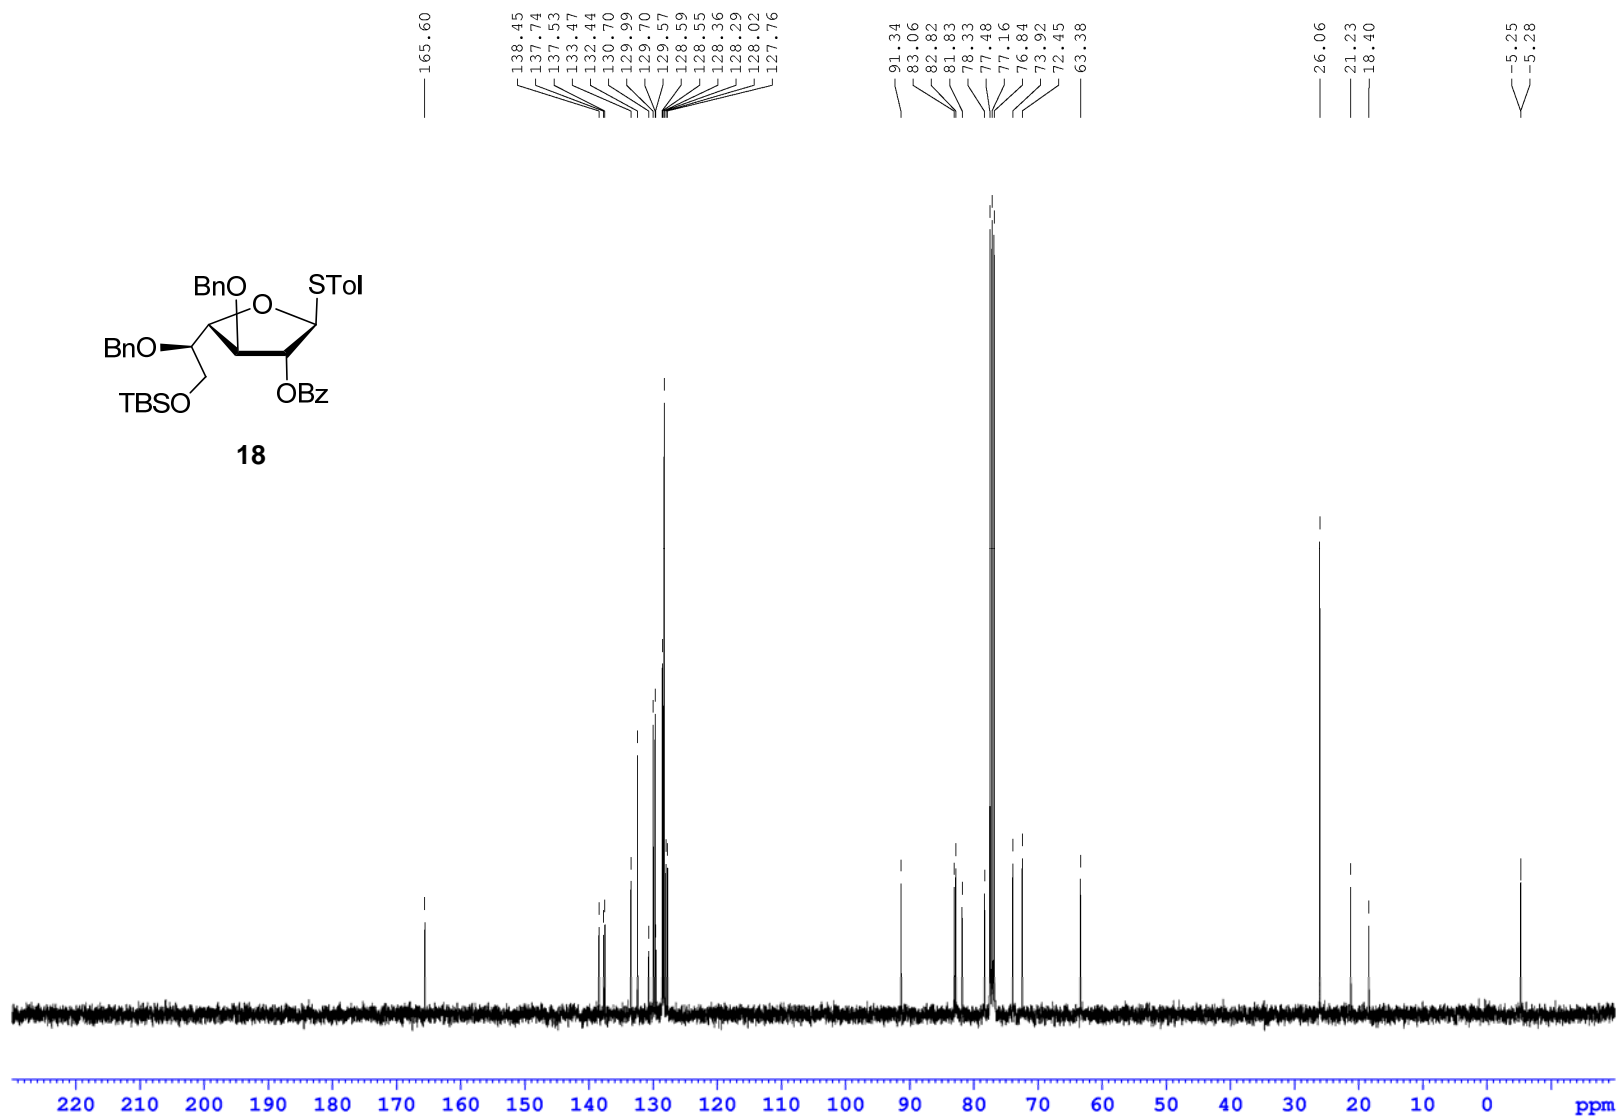

Supplementary Figure 18. <sup>13</sup>C NMR spectrum of compound 18

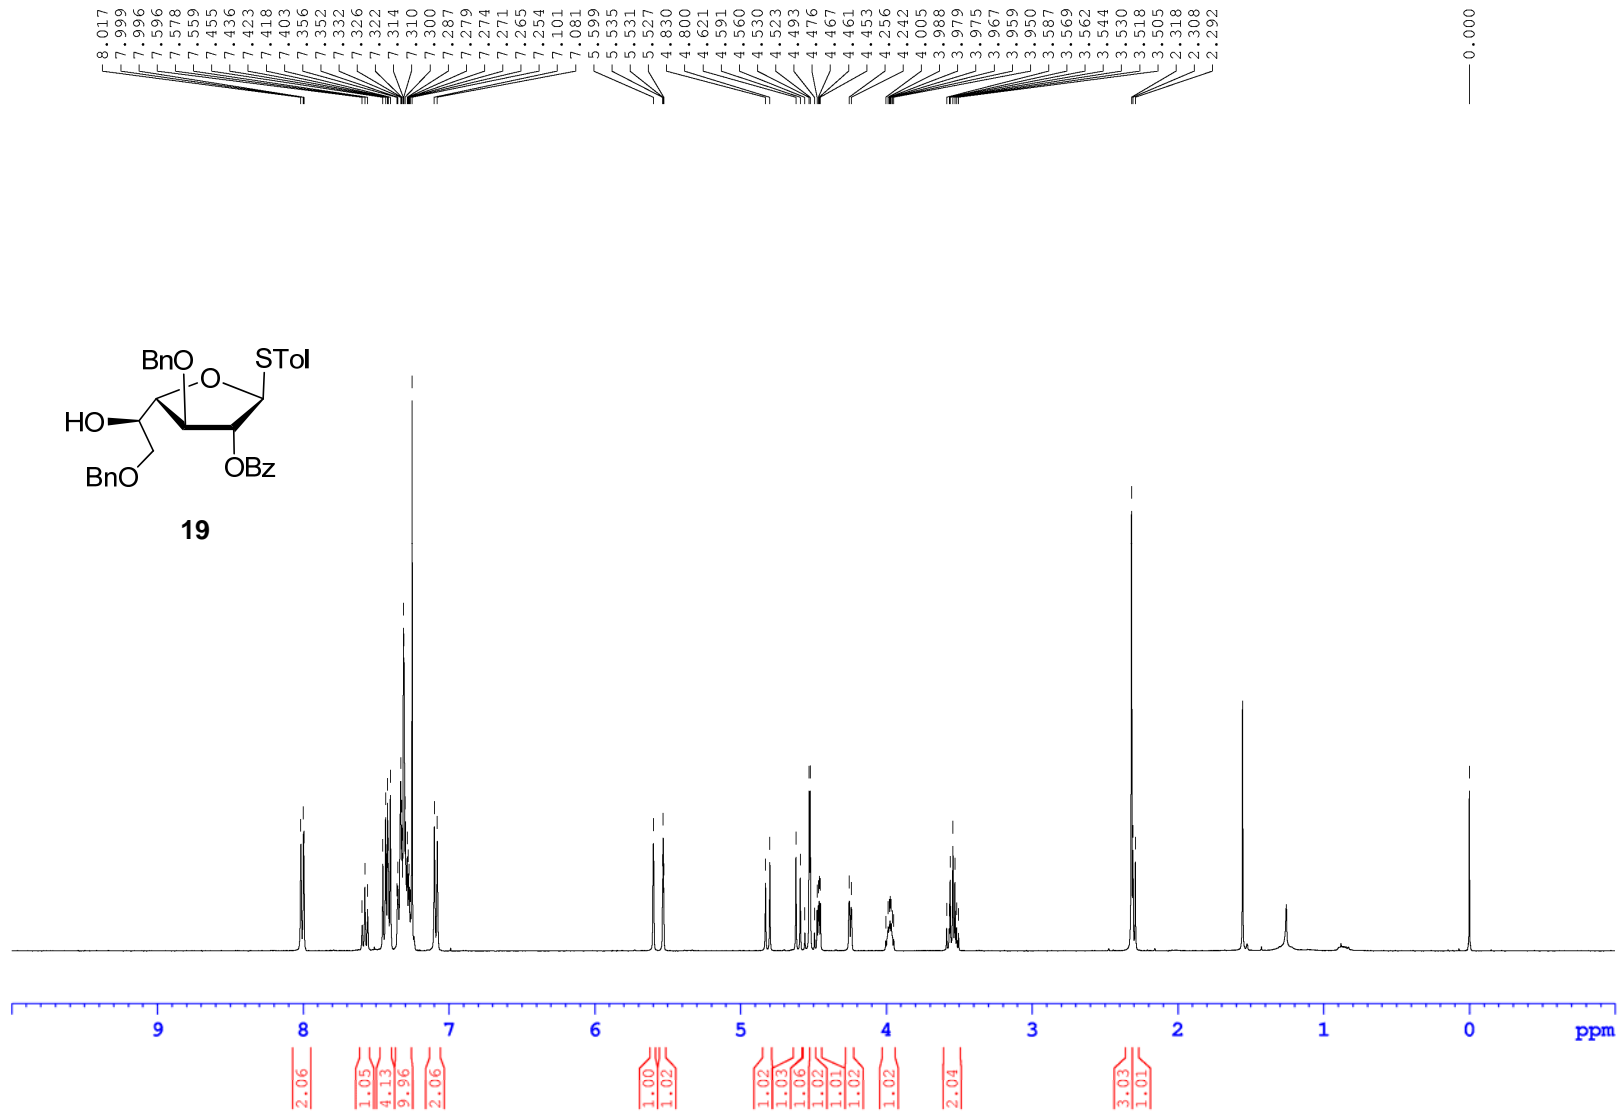

Supplementary Figure 19. <sup>1</sup>H NMR spectrum of compound 19

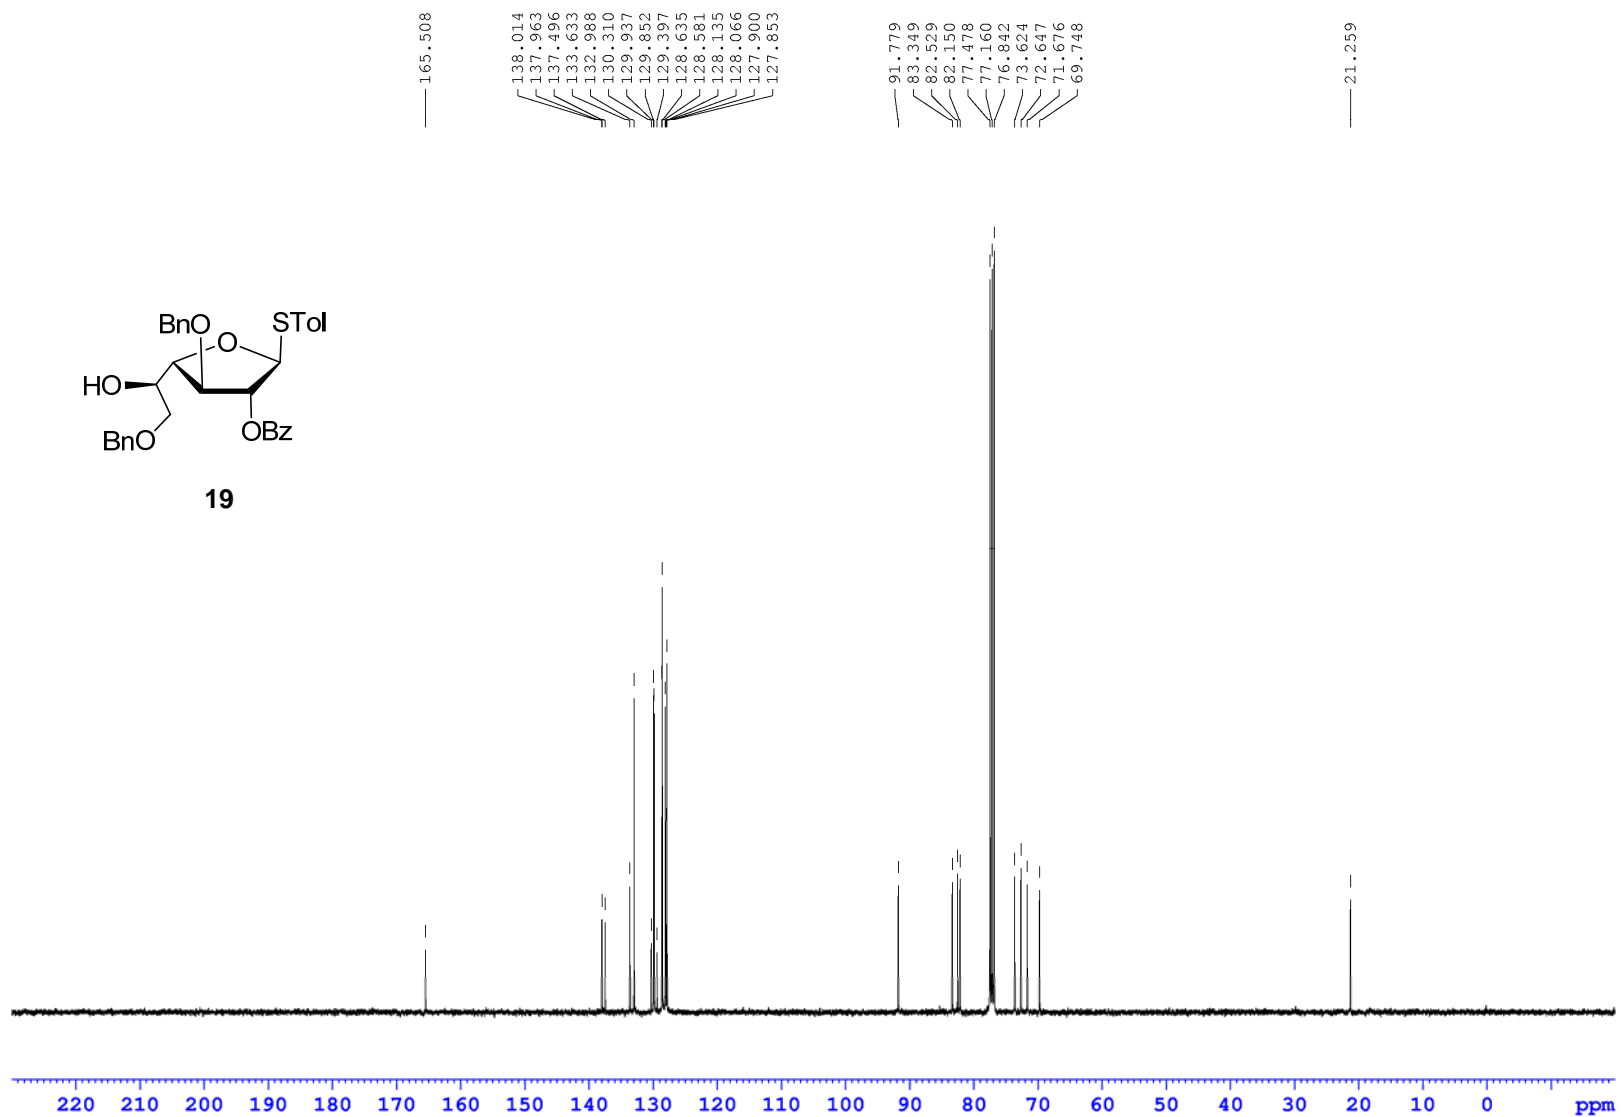

Supplementary Figure 20. <sup>13</sup>C NMR spectrum of compound 19

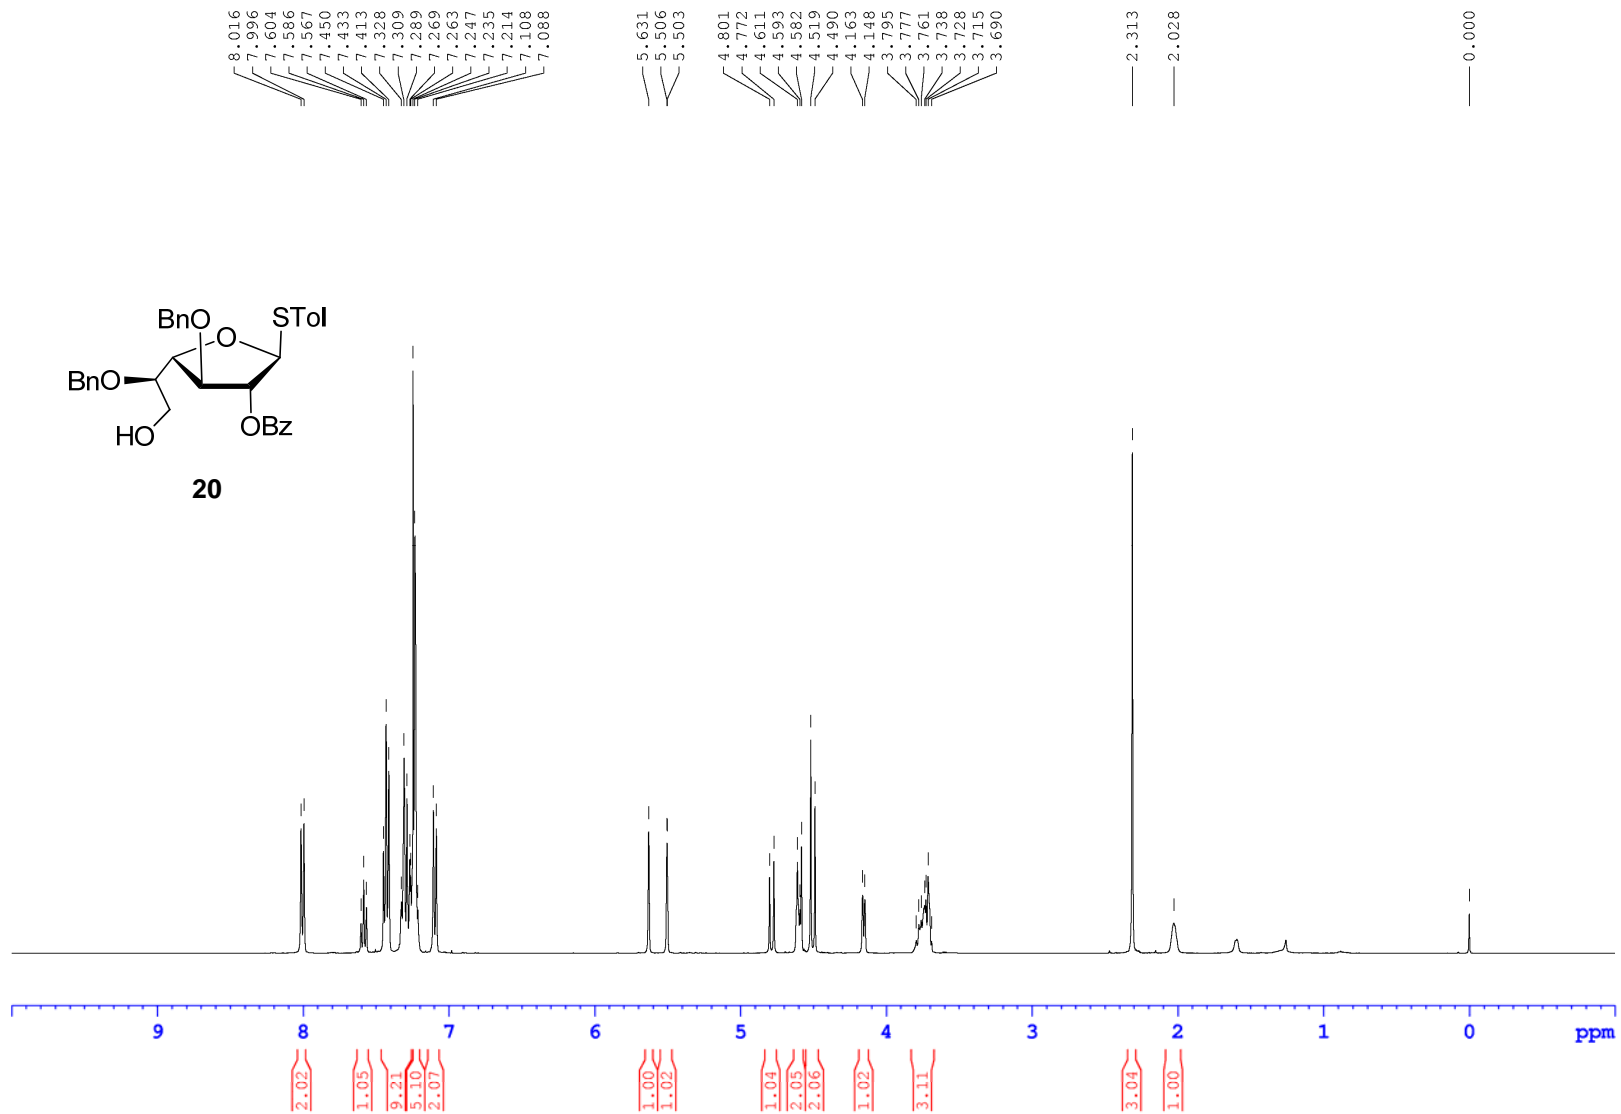

Supplementary Figure 21. <sup>1</sup>H NMR spectrum of compound 20

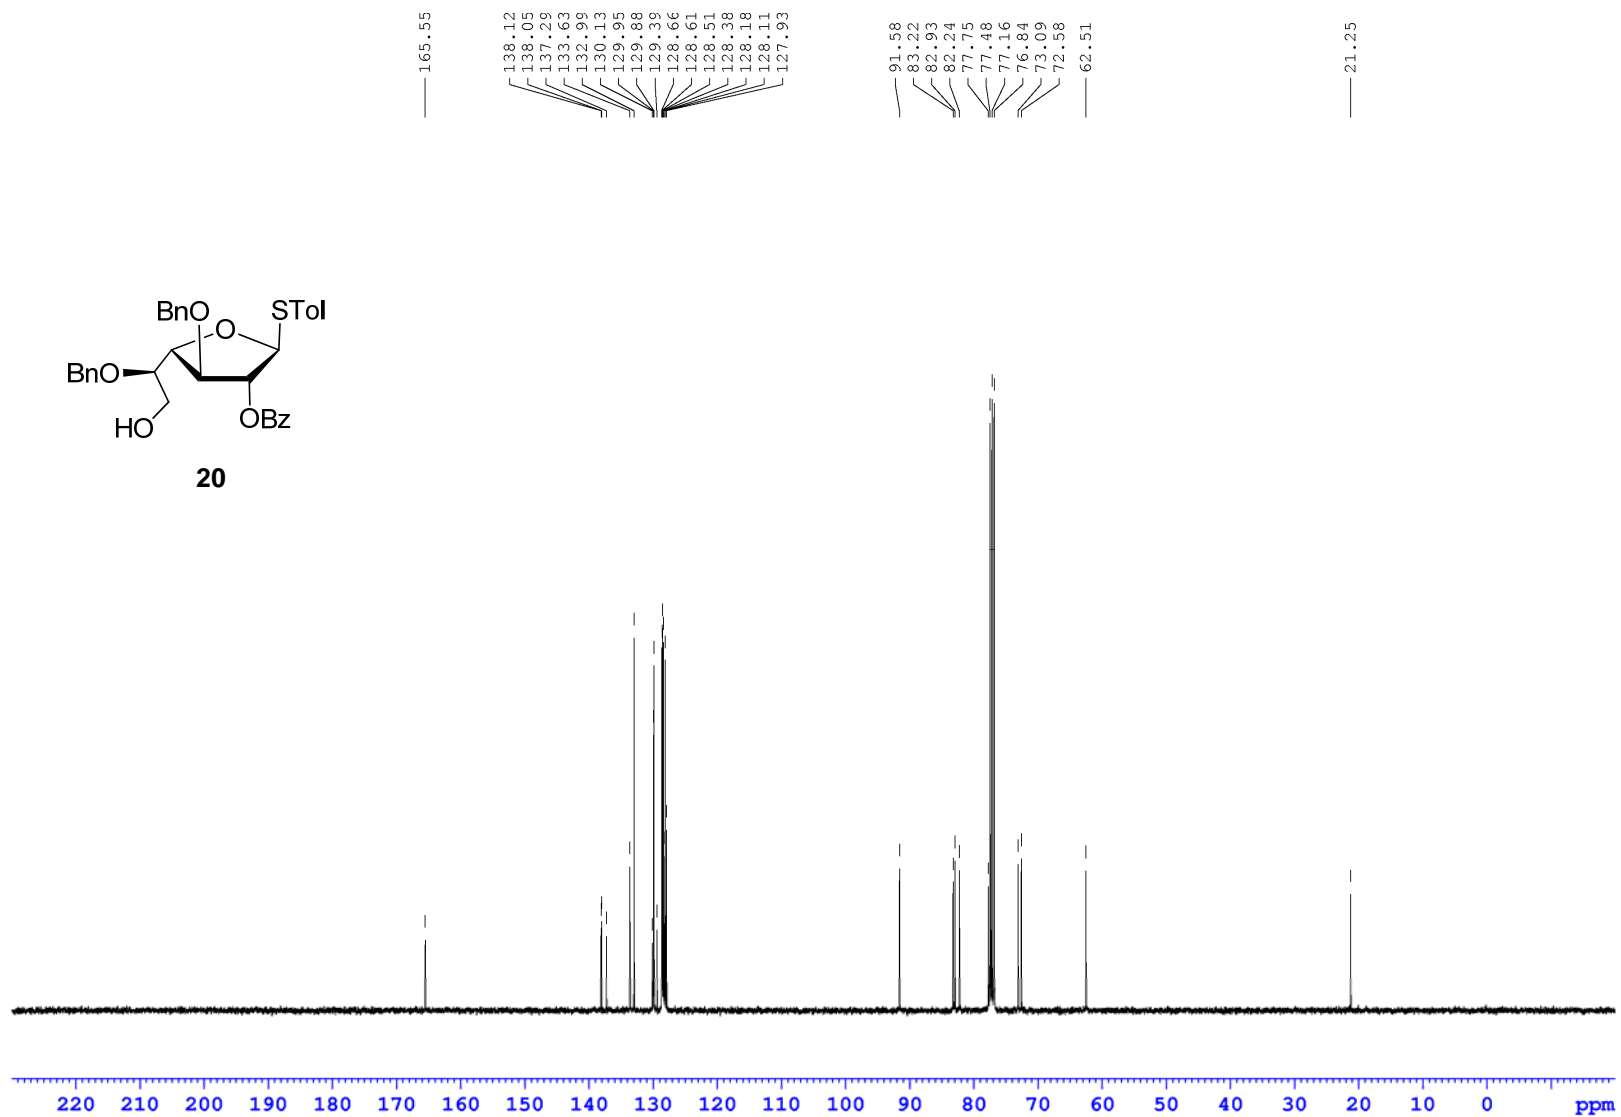

Supplementary Figure 22. <sup>13</sup>C NMR spectrum of compound 20

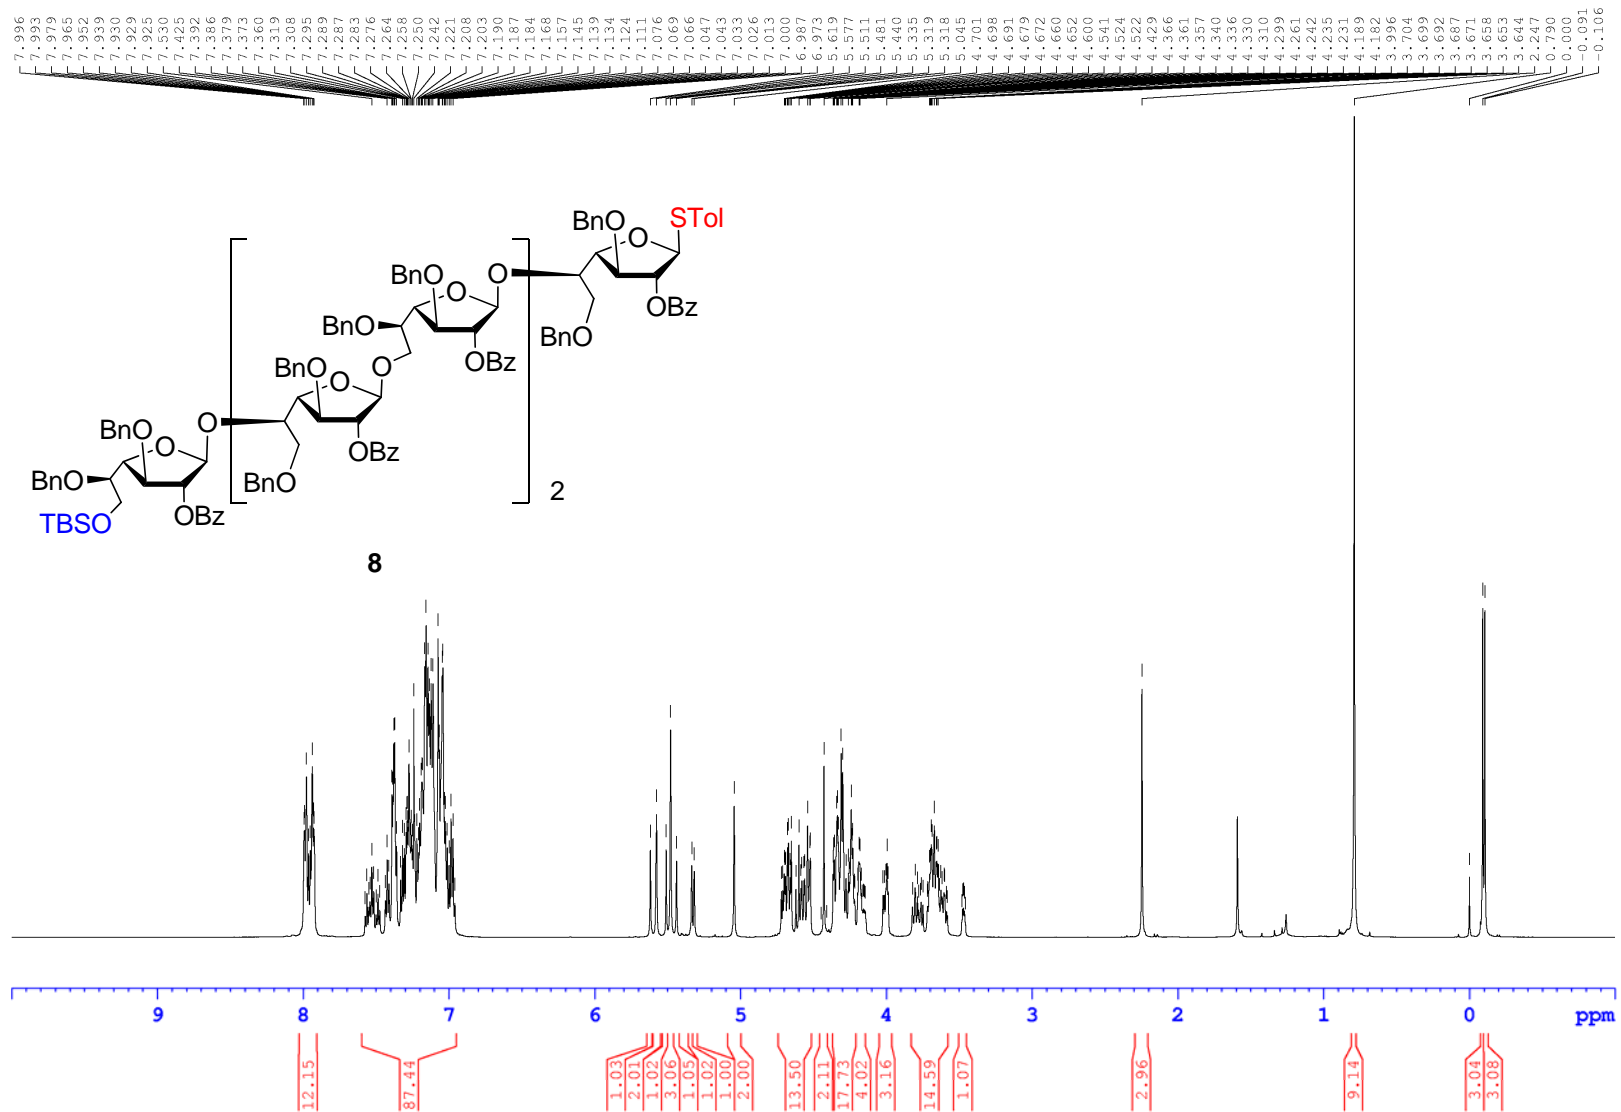

Supplementary Figure 23. <sup>1</sup>H NMR spectrum of compound 8

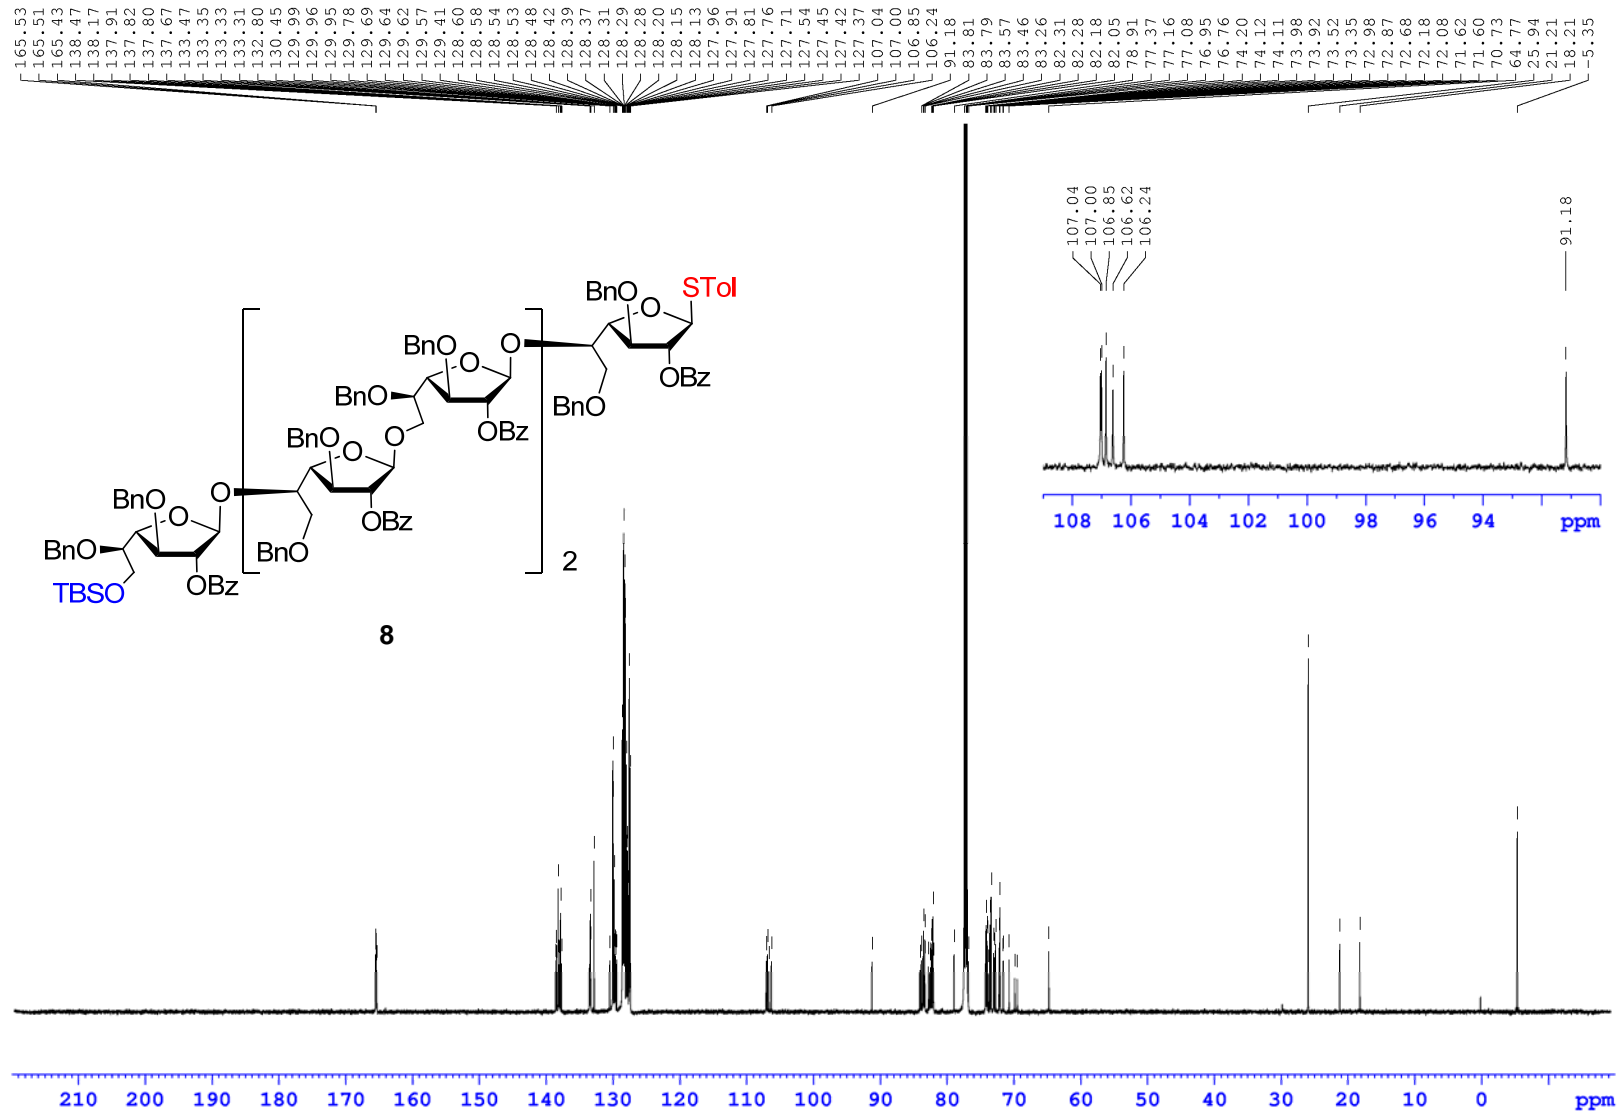

Supplementary Figure 24.  $^{13}\text{C}$  NMR spectrum of compound 8



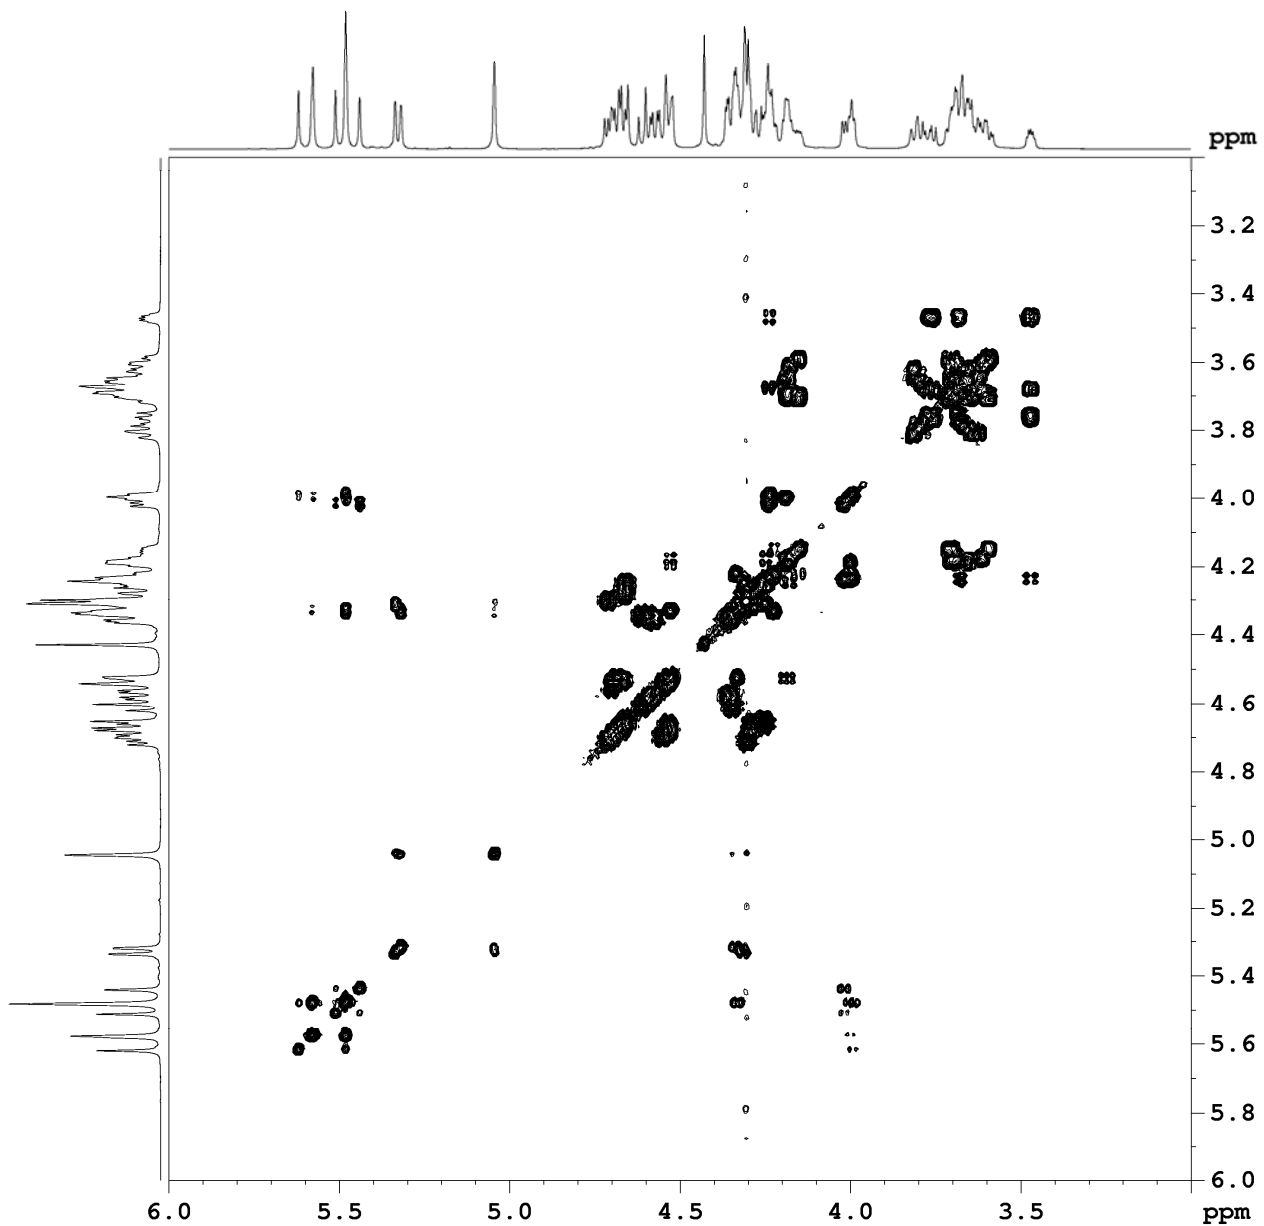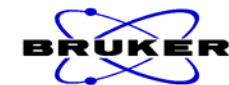

```

NAME          WY-0202
EXPNO         3
PROCNO        1
Date_         20141219
Time          11.12
INSTRUM       spect
PROBHD        5 mm CPTCI 1H-
PULPROG       cosygpmfqf
TD            2048
SOLVENT       CDC13
NS            4
DS            8
SWH           6188.119 Hz
FIDRES        3.021542 Hz
AQ            0.1655284 sec
RG            203
DW            80.800 usec
DE            10.00 usec
TE            300.4 K
D0            0.00000300 sec
D1            2.00000000 sec
D13           0.00000400 sec
D16           0.00020000 sec
IN0           0.00016160 sec

```

```

===== CHANNEL f1 =====
NUC1          1H
P1            12.00 usec
ND0           1
TD            1024
SFO1          600.1324 MHz
FIDRES        6.043123 Hz
SW            10.311 ppm
FnMODE        QF
SI            2048
SF            600.1300268 MHz
WDW           SINE
SSB           0
LB            0.00 Hz
GB            0
PC            1.40
SI            1024
MC2           QF
SF            600.1300262 MHz
WDW           SINE
SSB           0
LB            0.00 Hz
GB            0

```

Supplementary Figure 25. COSY NMR spectrum of compound 8

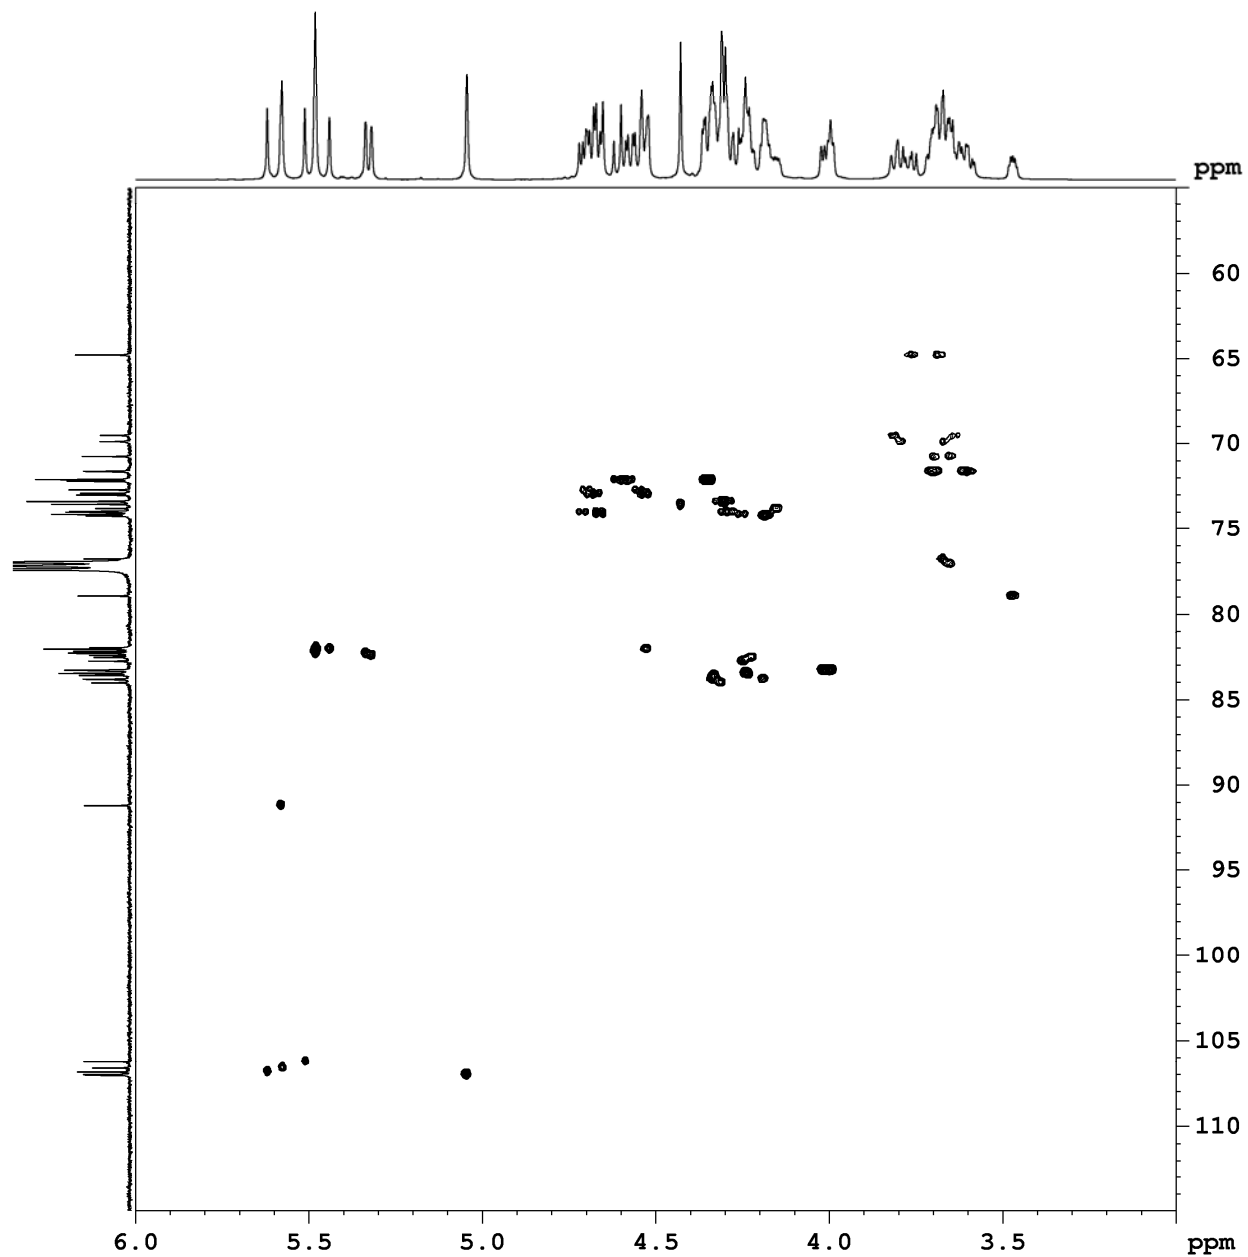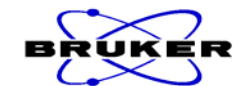

```

NAME           WY-0202
EXPNO          4
PROCNO         1
Date_          20141219
Time           13.47
INSTRUM        spect
PROBHD         5 mm CPTCI 1H-
PULPROG        hsqcetgpsi
TD             2048
SOLVENT        CDC13
NS             8
DS             16
SWH            6188.119 Hz
FIDRES         3.021542 Hz
AQ             0.1655284 sec
RG             203
DW             80.800 usec
DE             10.00 usec
TE             300.4 K
CNST2          145.0000000
D0             0.00000300 sec
D1             1.50000000 sec
D4             0.00172414 sec
D11            0.03000000 sec
D13            0.00000400 sec
D16            0.00020000 sec
D24            0.00110000 sec
IN0            0.00002000 sec
ZGPTNS

===== CHANNEL f1 =====
NUC1           1H
P1             12.00 usec
P2             24.00 usec
P28            0.00 usec
ND0            ?
TD             512
SF01           150.9141 MHz
FIDRES         48.822838 Hz
SW             165.639 ppm
FnMODE         Echo-Antiecho
SI             2048
SF             600.1300251 MHz
WDW            QSINE
SSB            2
LB             0.00 Hz
GB             0
PC             1.40
SI             1024
MC2            echo-antiecho
SF             150.9027851 MHz
WDW            QSINE
SSB            2
LB             0.00 Hz
GB             0

```

Supplementary Figure 26. HSQC NMR spectrum of compound 8

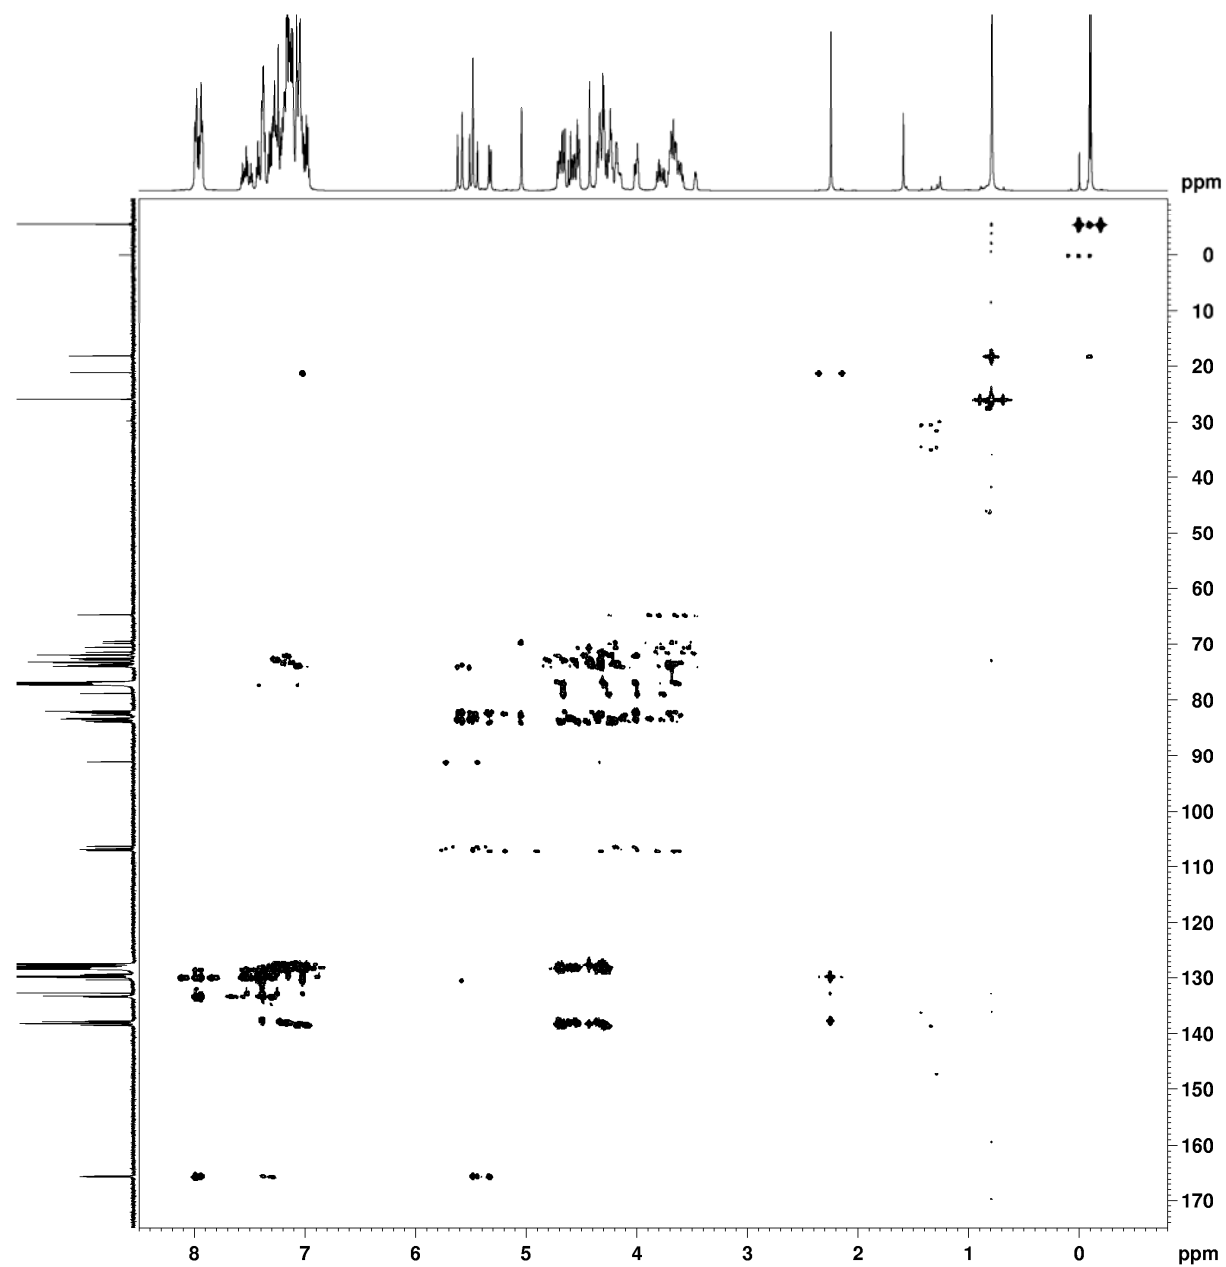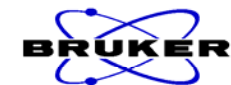

```

NAME          WY-0202
EXPNO         5
PROCNO        1
Date_         20141219
Time          15.43
INSTRUM       spect
PROBHD        5 mm CPTCI 1H-
PULPROG       hmbcgpndqf
TD            2048
SOLVENT       CDCl3
NS            16
DS            16
SWH           6188.119 Hz
FIDRES        3.021542 Hz
AQ            0.1655284 sec
RG            203
DW            80.800 usec
DE            10.00 usec
TE            300.4 K
CNST13        8.0000000
D0            0.00000300 sec
D1            1.50000000 sec
D6            0.06250000 sec
D16           0.00020000 sec
IN0           0.00001680 sec

```

```

===== CHANNEL f1 =====
NUC1          1H
P1            12.00 usec
P2            24.00 usec
ND0           2
TD            512
SFO1         150.9151 MHz
FIDRES        58.129791 Hz
SW            197.213 ppm
FhMODE        QF
SI            2048
SF            600.1300258 MHz
WDW           SINE
SSB           0
LB            0.00 Hz
GB            0
PC            1.40
SI            1024
MC2           QF
SF            150.9027798 MHz
WDW           STNR
SSB           0
LB            0.00 Hz
GB            0

```

Supplementary Figure 27. HMBC NMR spectrum of compound 8

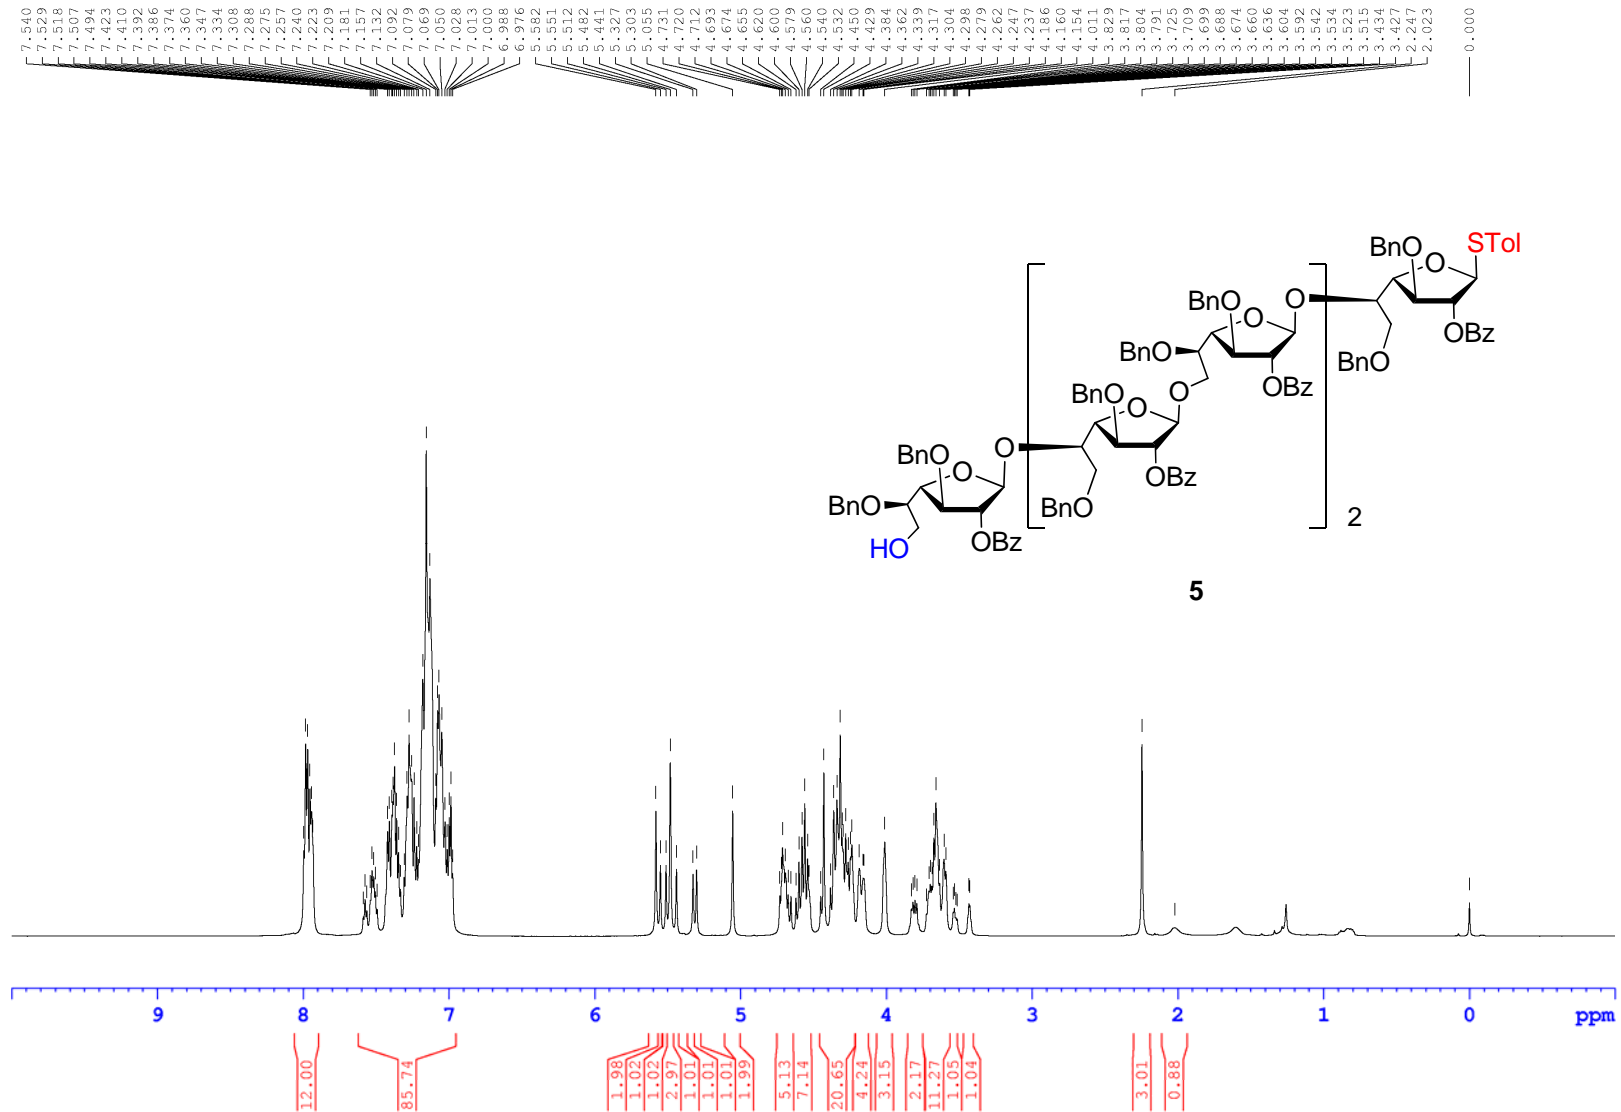

Supplementary Figure 28. <sup>1</sup>H NMR spectrum of compound 5





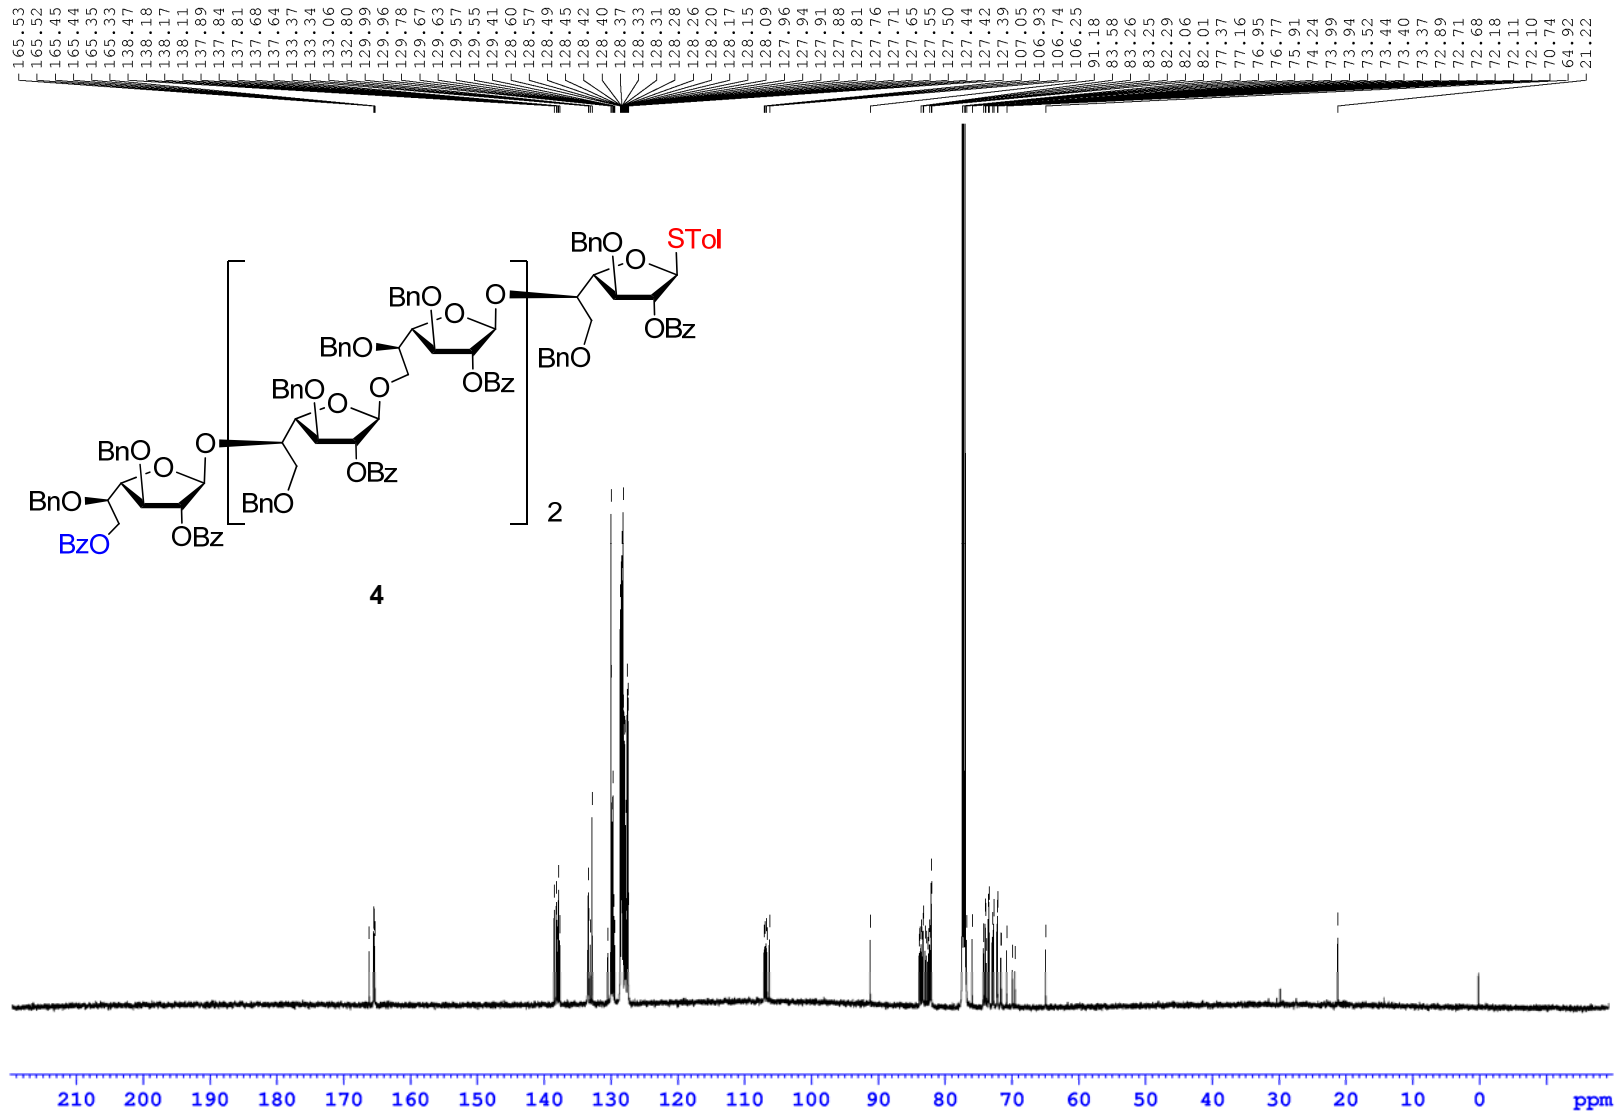

Supplementary Figure 31.  $^{13}\text{C}$  NMR spectrum of compound 4

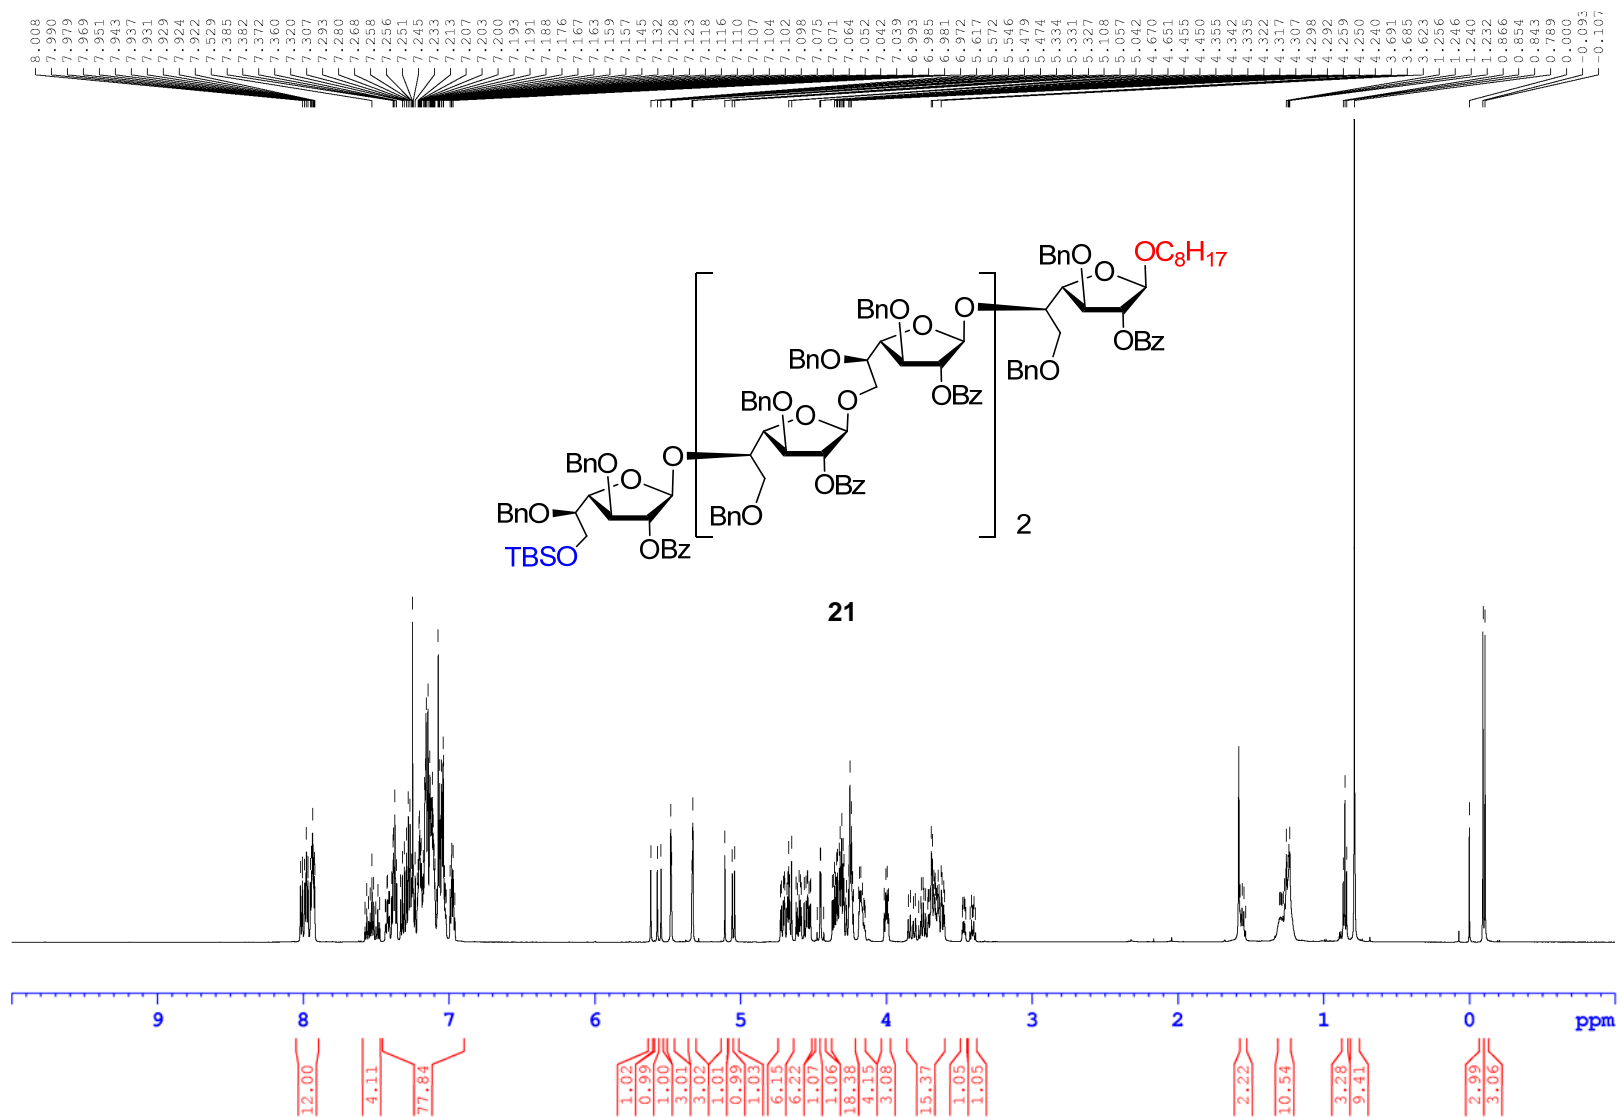

Supplementary Figure 32.  $^1\text{H}$  NMR spectrum of compound 21



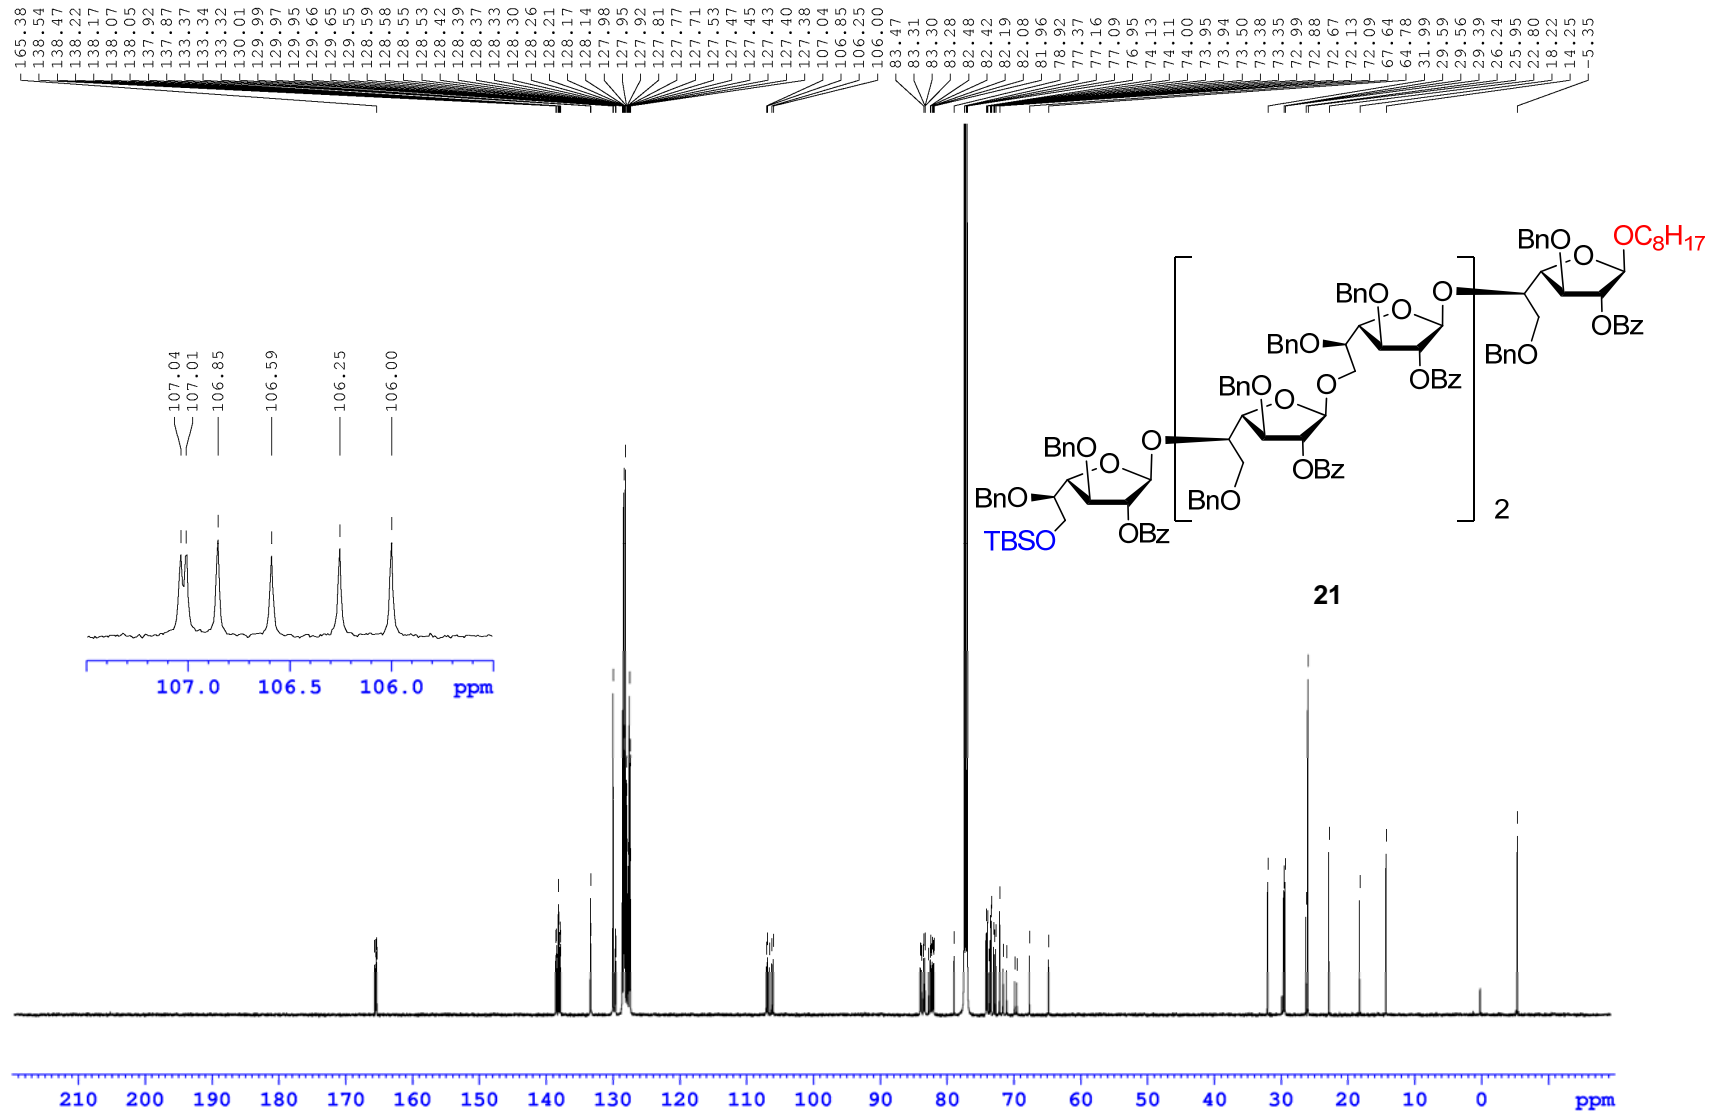

Supplementary Figure 33.  $^{13}C$  NMR spectrum of compound 21

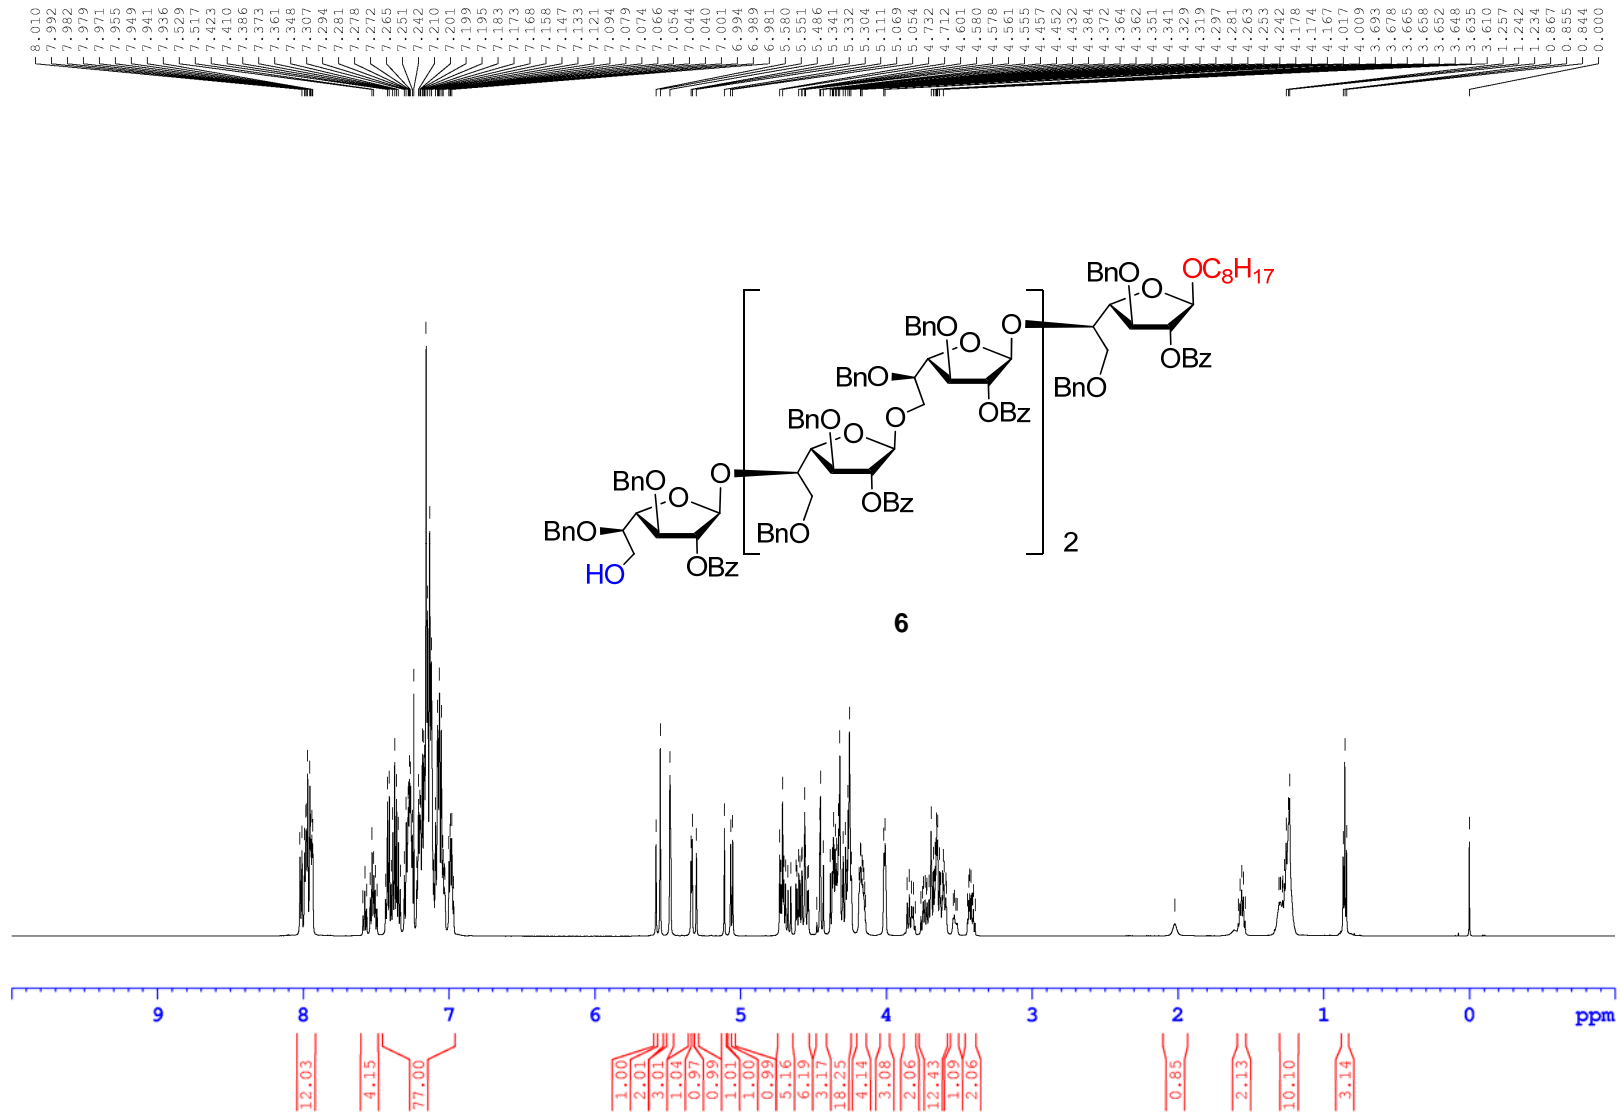

Supplementary Figure 34. <sup>1</sup>H NMR spectrum of compound 6

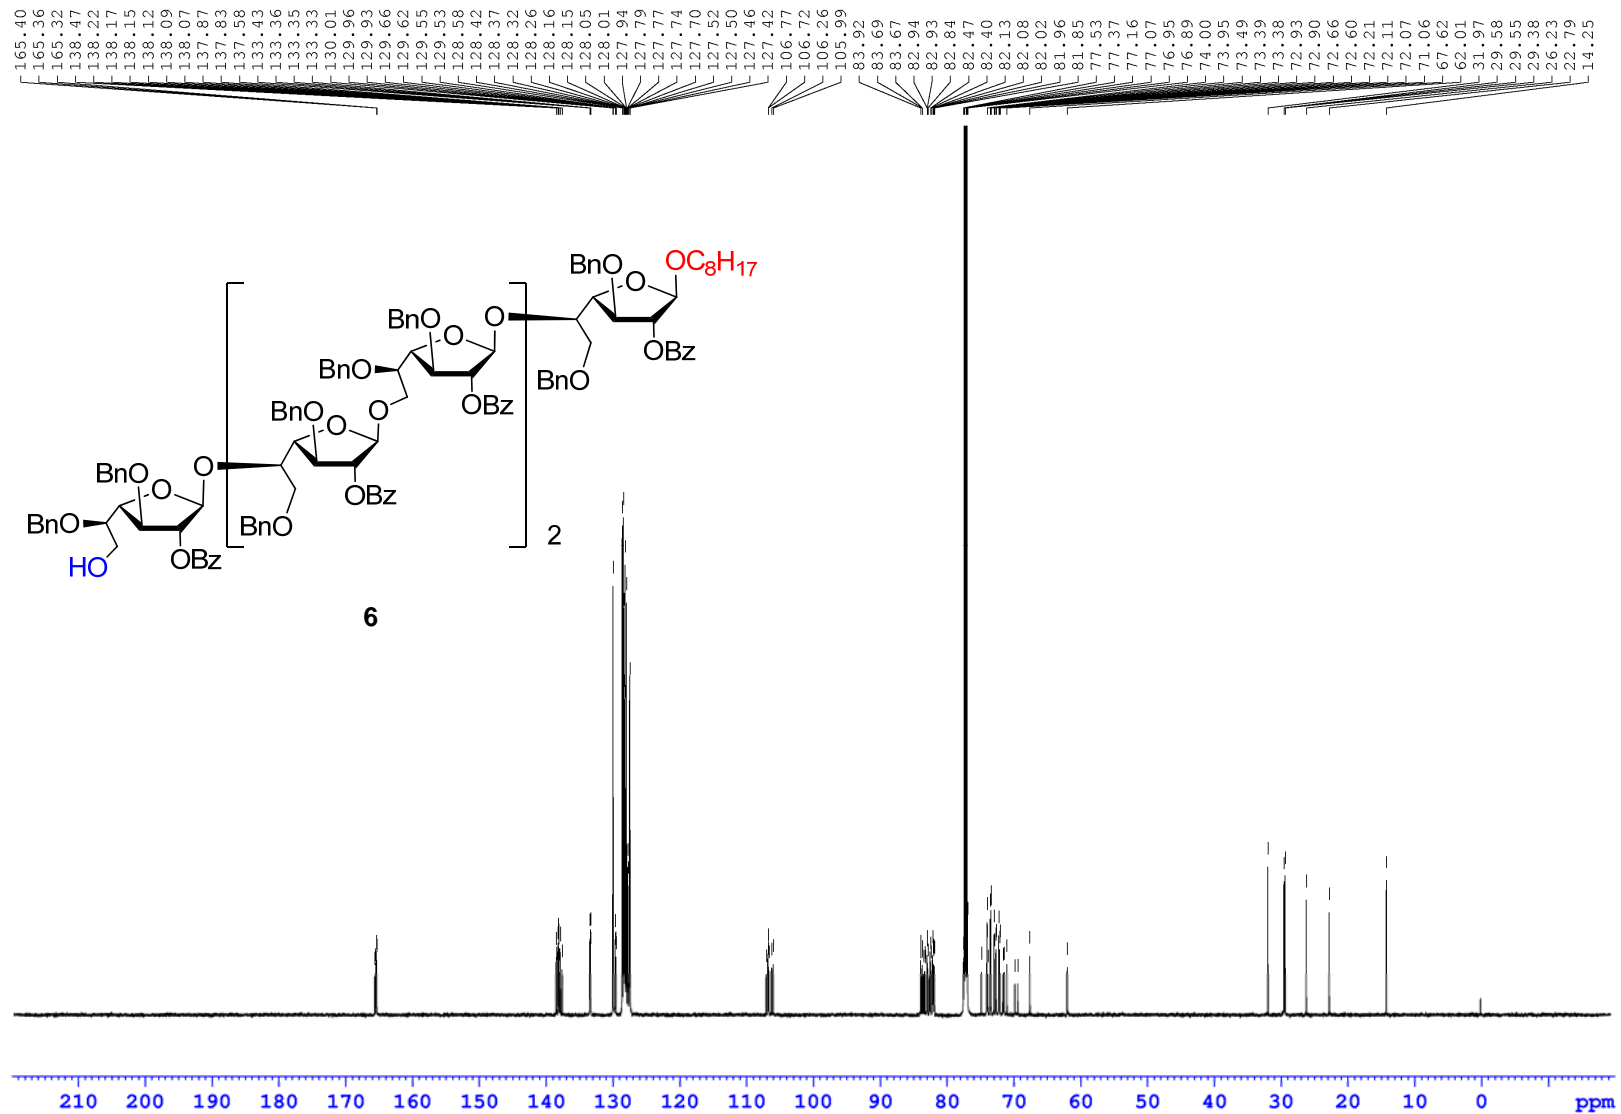

Supplementary Figure 35. <sup>13</sup>C NMR spectrum of compound 6



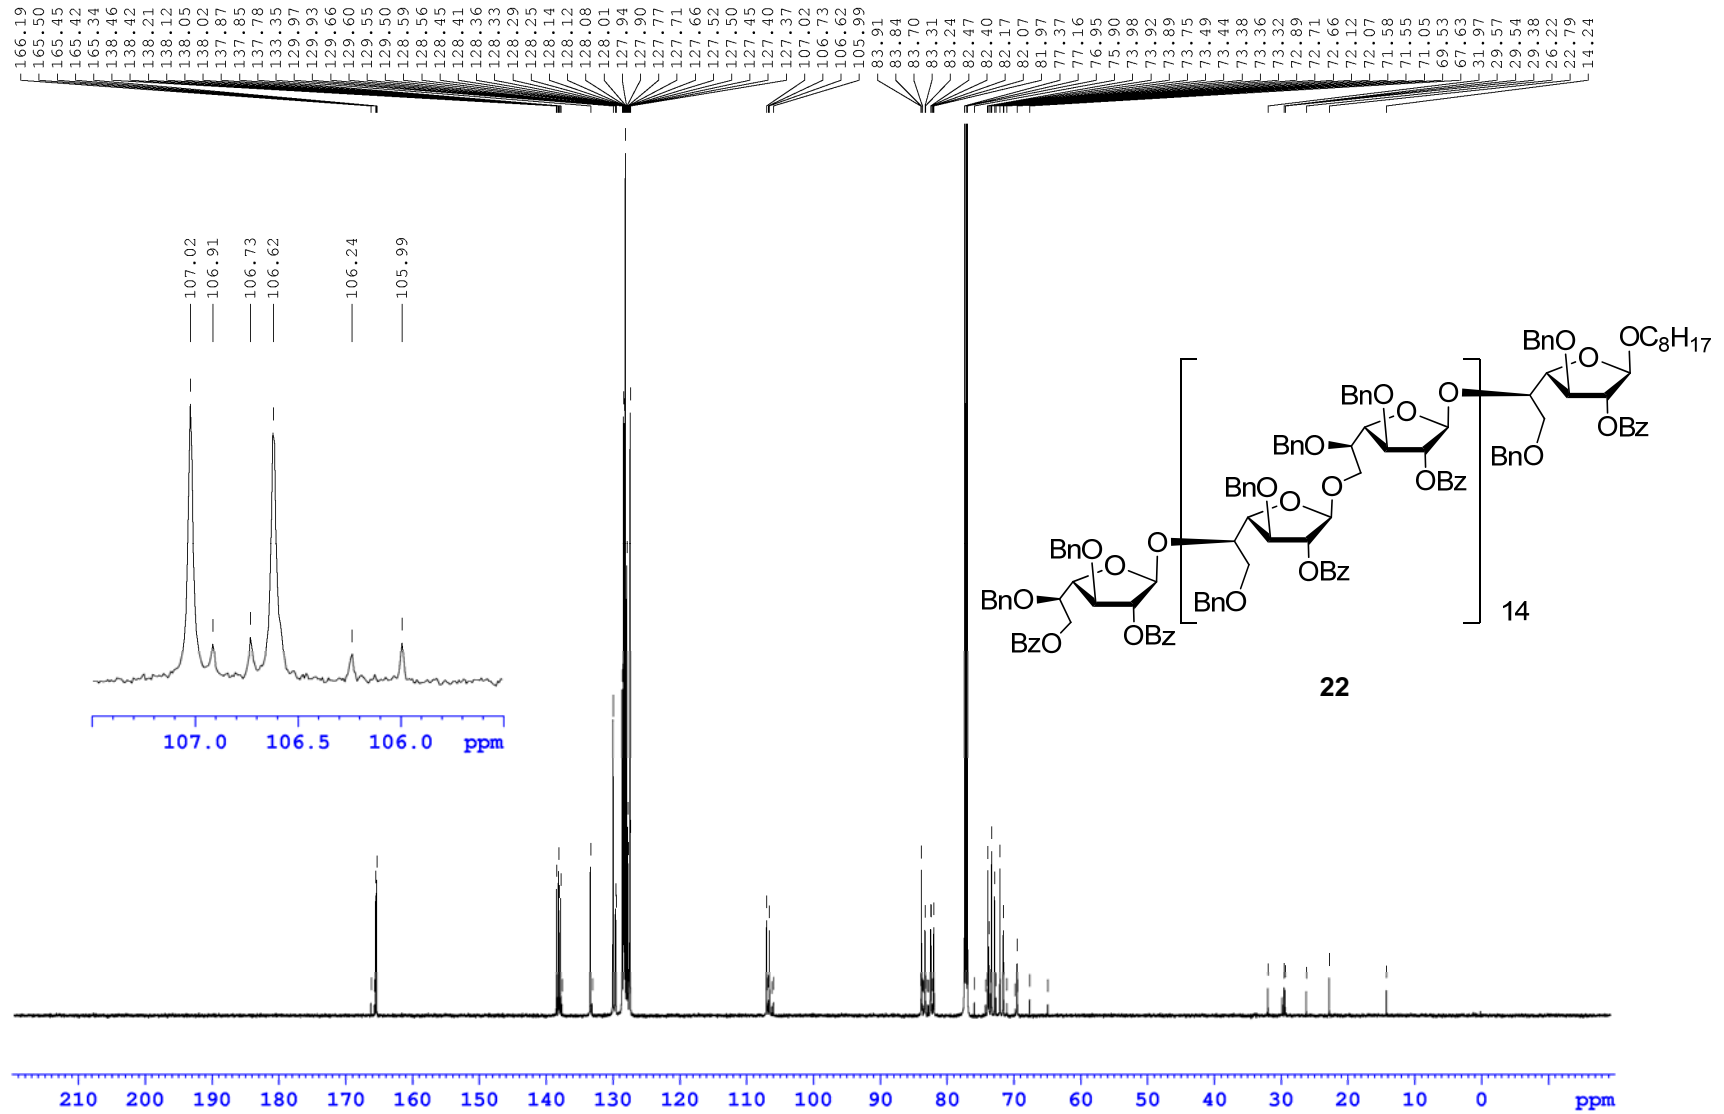

Supplementary Figure 37. <sup>13</sup>C NMR spectrum of compound 22

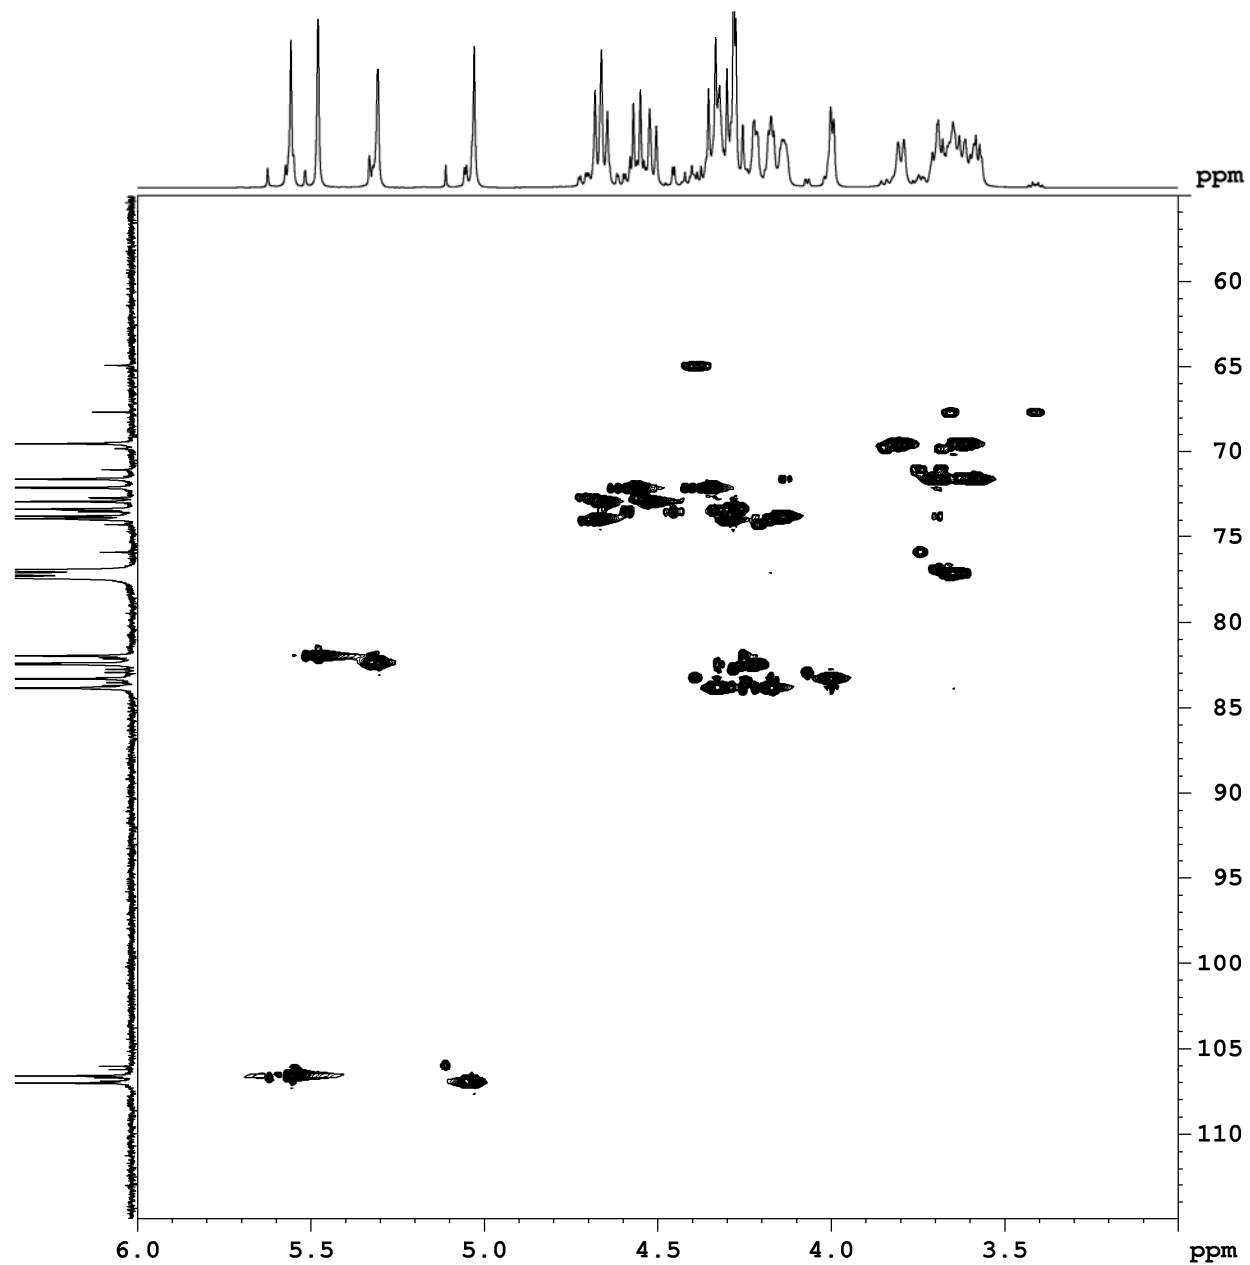

```

NAME          WY-0207
EXPNO         4
PROCNO        1
Date_         20150612
Time         16.23
INSTRUM       spect
PROBHD        5 mm CPTCI 1H-
PULPROG       hsqcetgpsi
TD            2048
SOLVENT       CDC13
NS            8
DS            16
SWH           5859.375 Hz
FIDRES        2.861023 Hz
AQ            0.1748127 sec
RG            203
DW            85.333 usec
DE            10.00 usec
TE            300.4 K
CNST2         145.0000000
D0            0.00000300 sec
D1            1.50000000 sec
D4            0.00172414 sec
D11           0.03000000 sec
D13           0.00000400 sec
D16           0.00020000 sec
D24           0.00110000 sec
IN0           0.00002000 sec
ZGPTNS

```

```

===== CHANNEL f1 =====
NUC1          1H
P1            12.30 usec
P2            24.60 usec
P28           0.00 usec
ND0           ?
TD            512
SF01          150.9141 MHz
FIDRES        48.822838 Hz
SW            165.639 ppm
FnMODE        Echo-Antiecho
SI            2048
SF            600.1300285 MHz
WDW           QSINE
SSB           2
LB            0.00 Hz
GB            0
PC            1.40
SI            1024
MC2           echo-antiecho
SF            150.9027814 MHz
WDW           QSINE
SSB           2
LB            0.00 Hz
GB            0

```

Supplementary Figure 38. HSQC NMR spectrum of compound 22

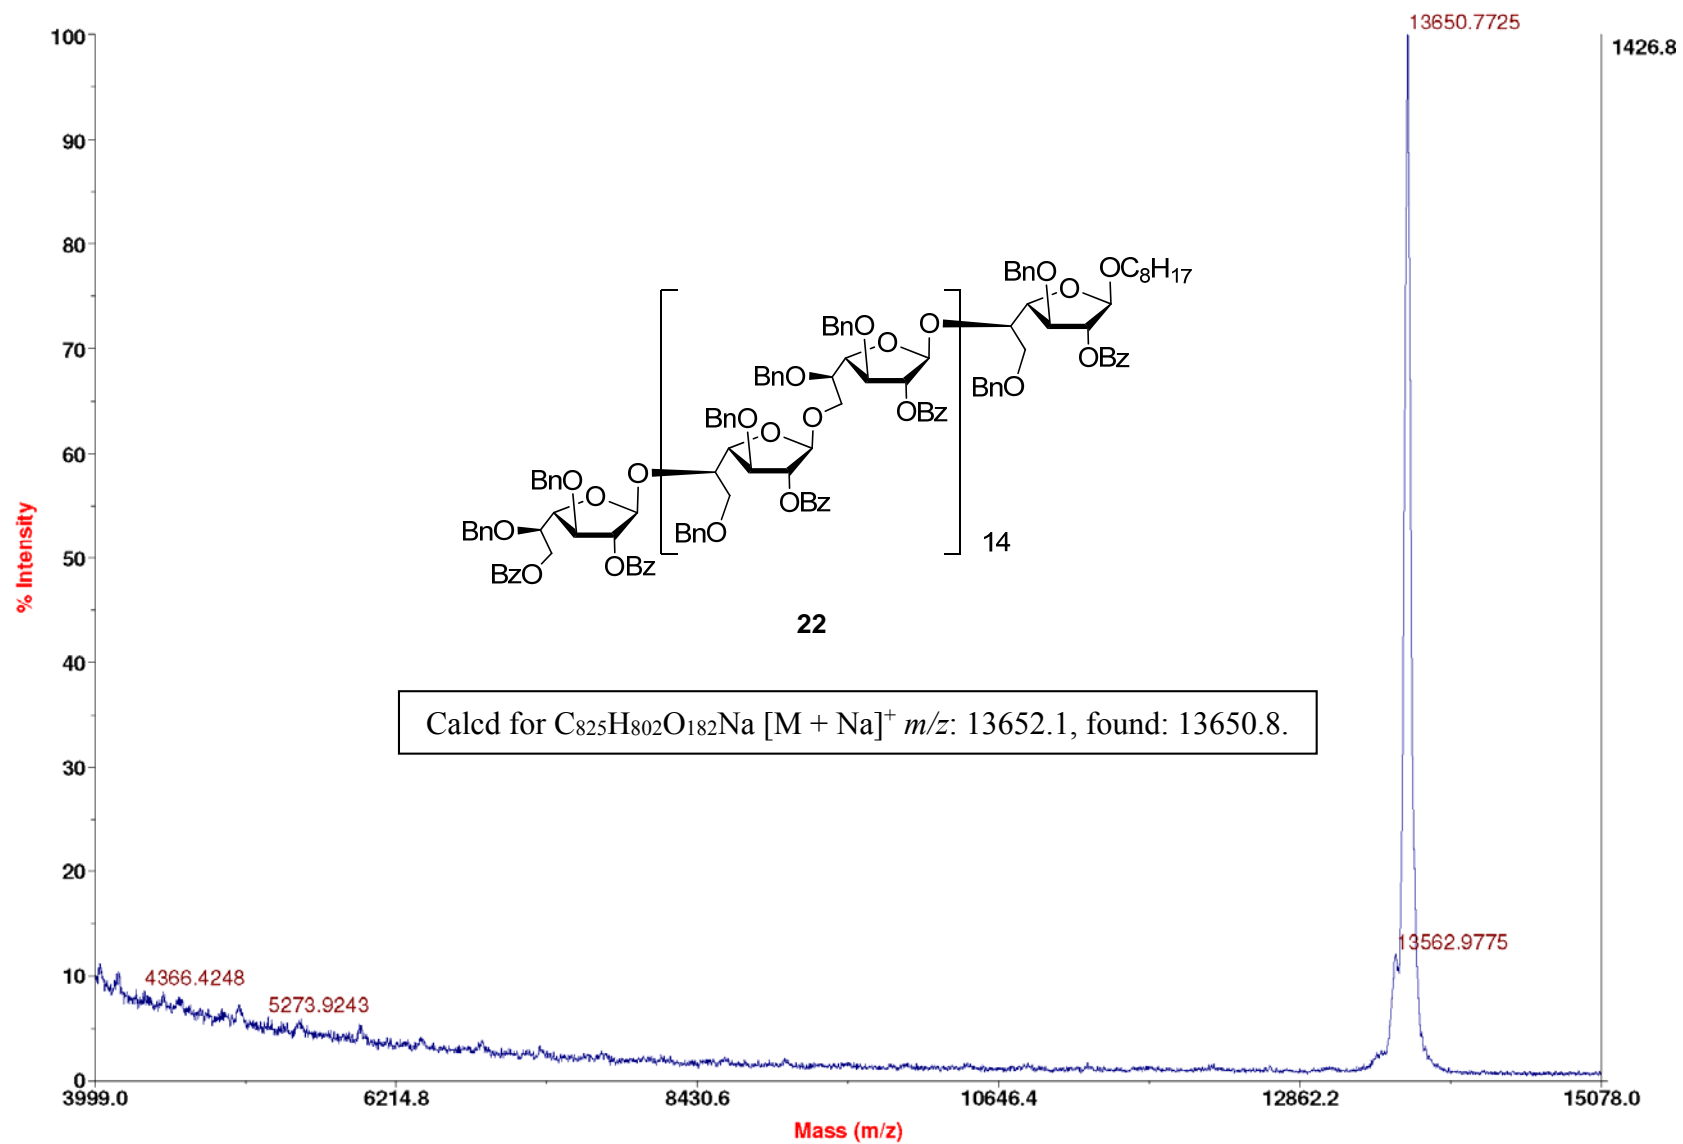

C:\AB SCIEX\TOFTOF Data\ExportT2D\zhong\20150320-2000\H12\_LINEAR.t2d

Printed: 14:42, May 08, 2015

Supplementary Figure 39. MALDI-TOF MS spectrum of compound 22

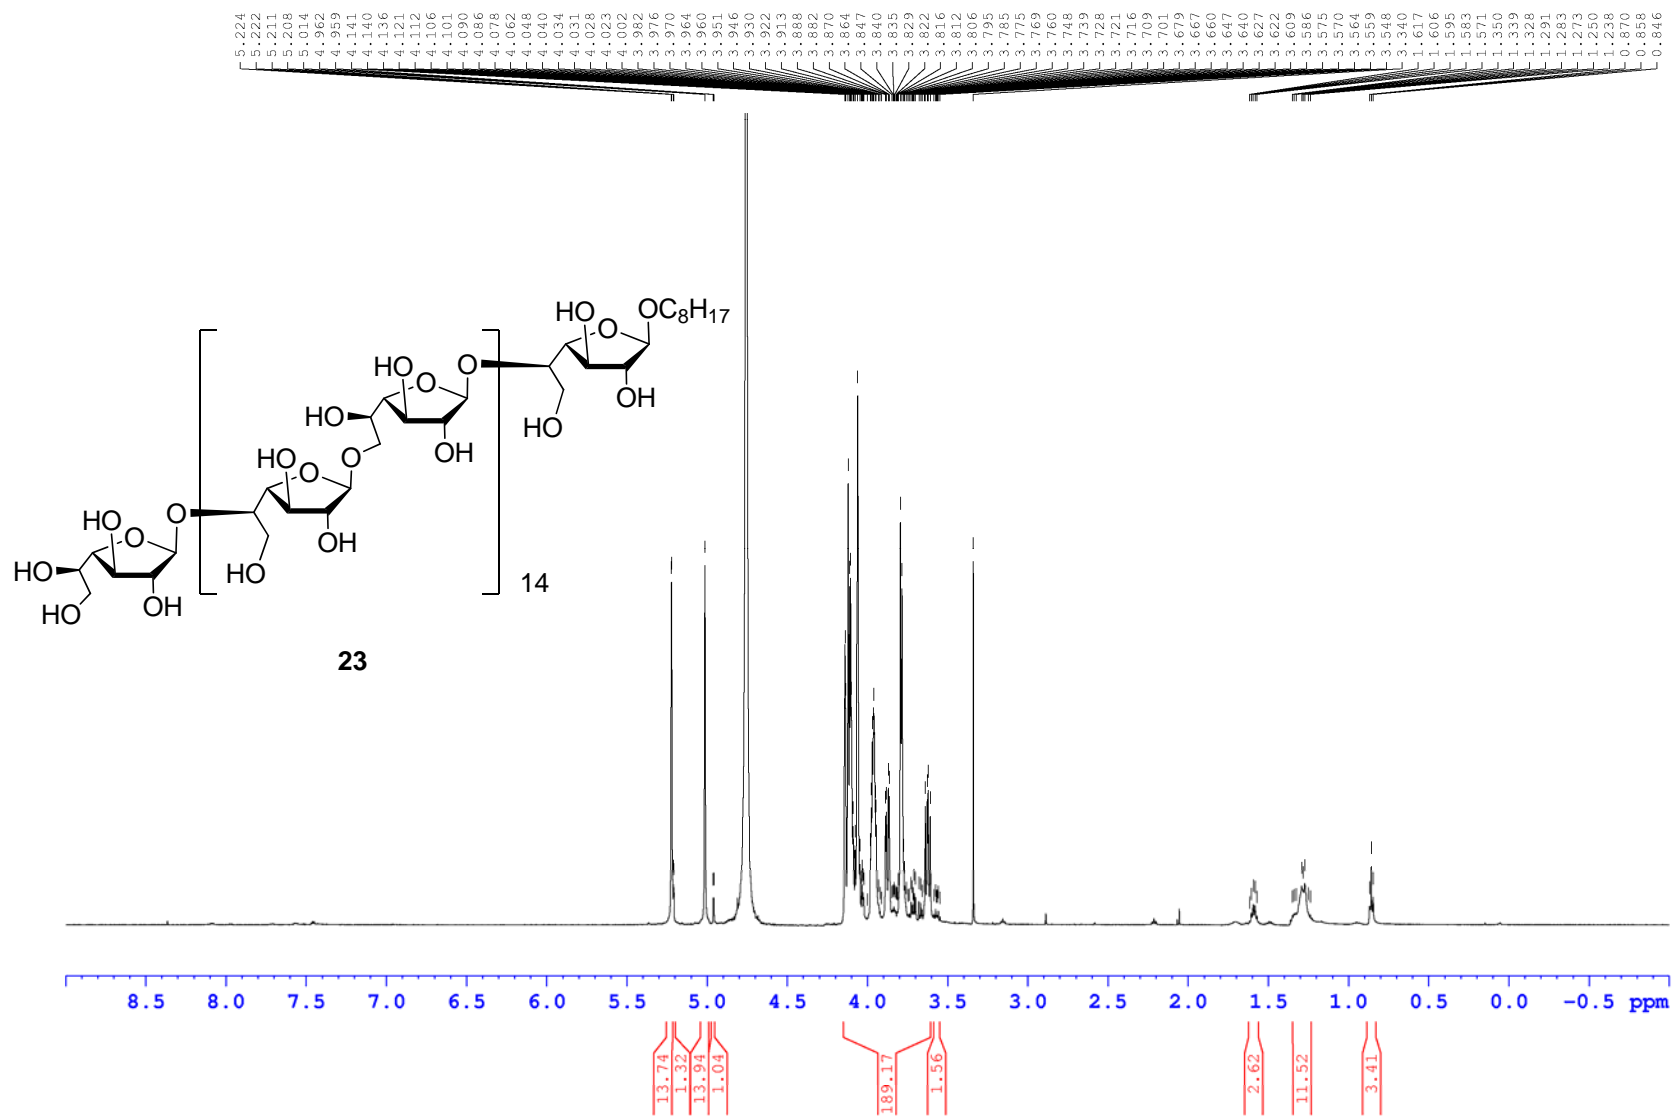

Supplementary Figure 40. <sup>1</sup>H NMR spectrum of compound 23



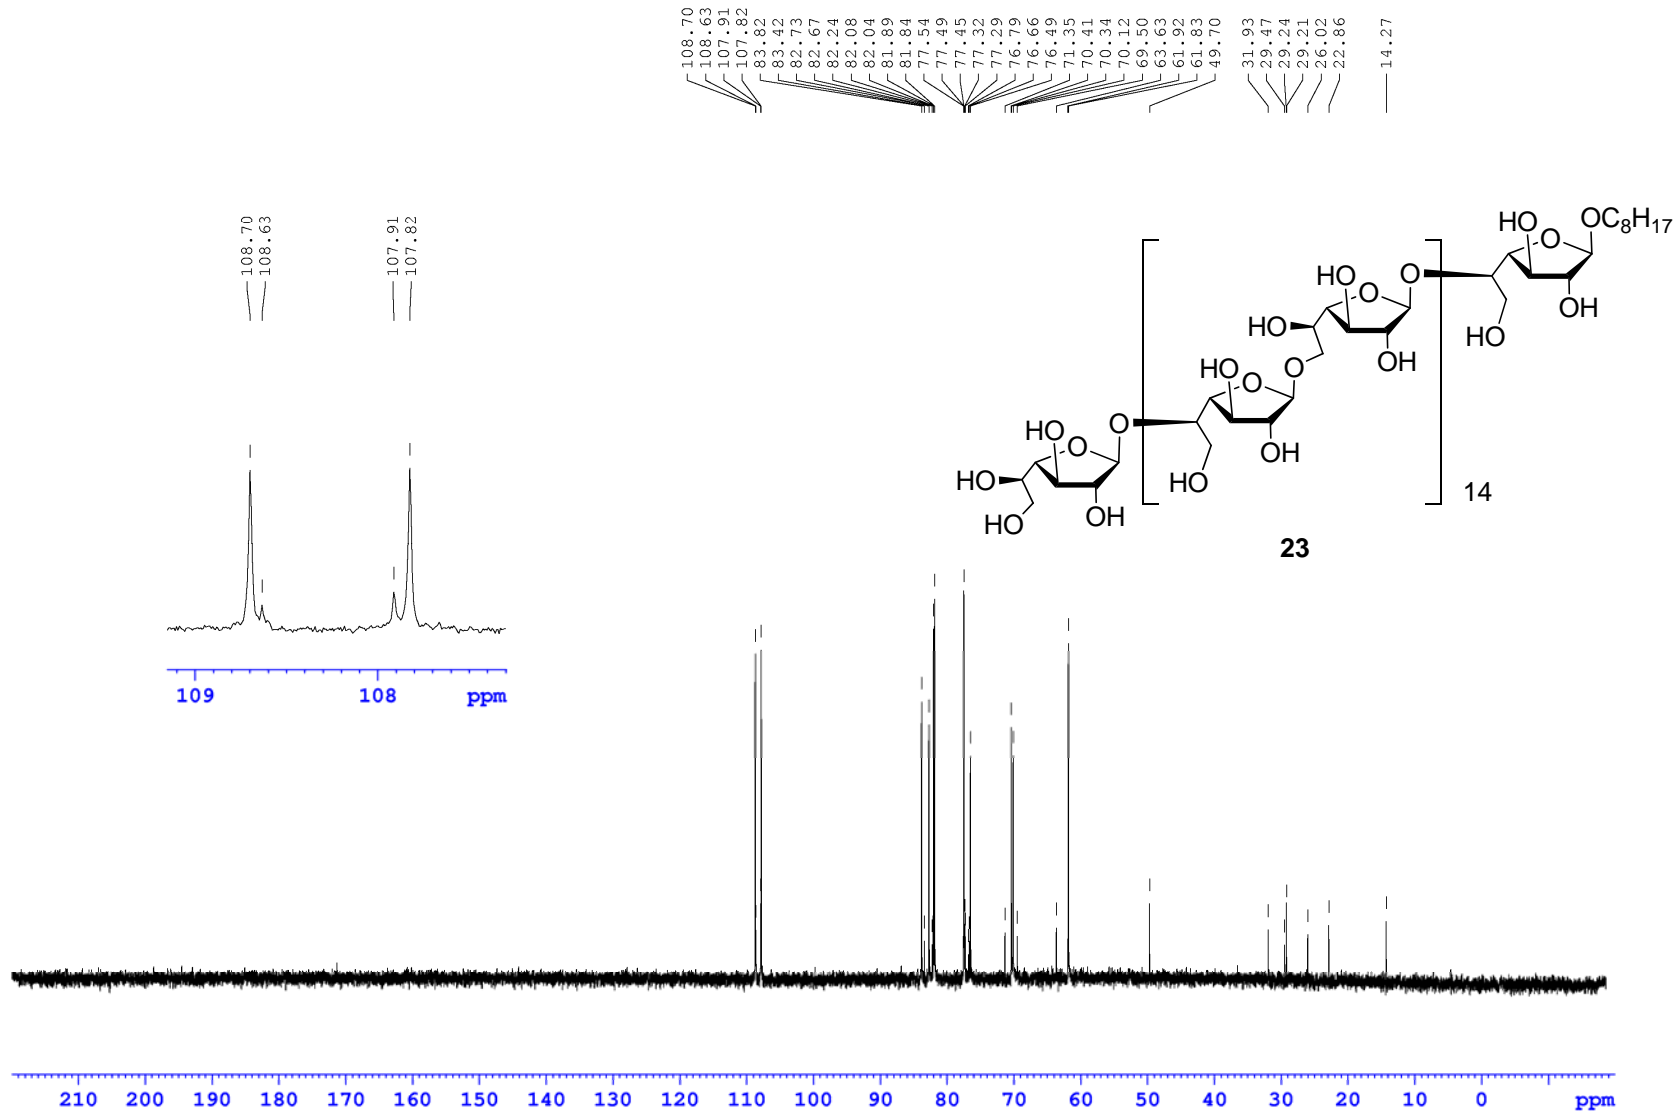

Supplementary Figure 41.  $^{13}\text{C}$  NMR spectrum of compound 23

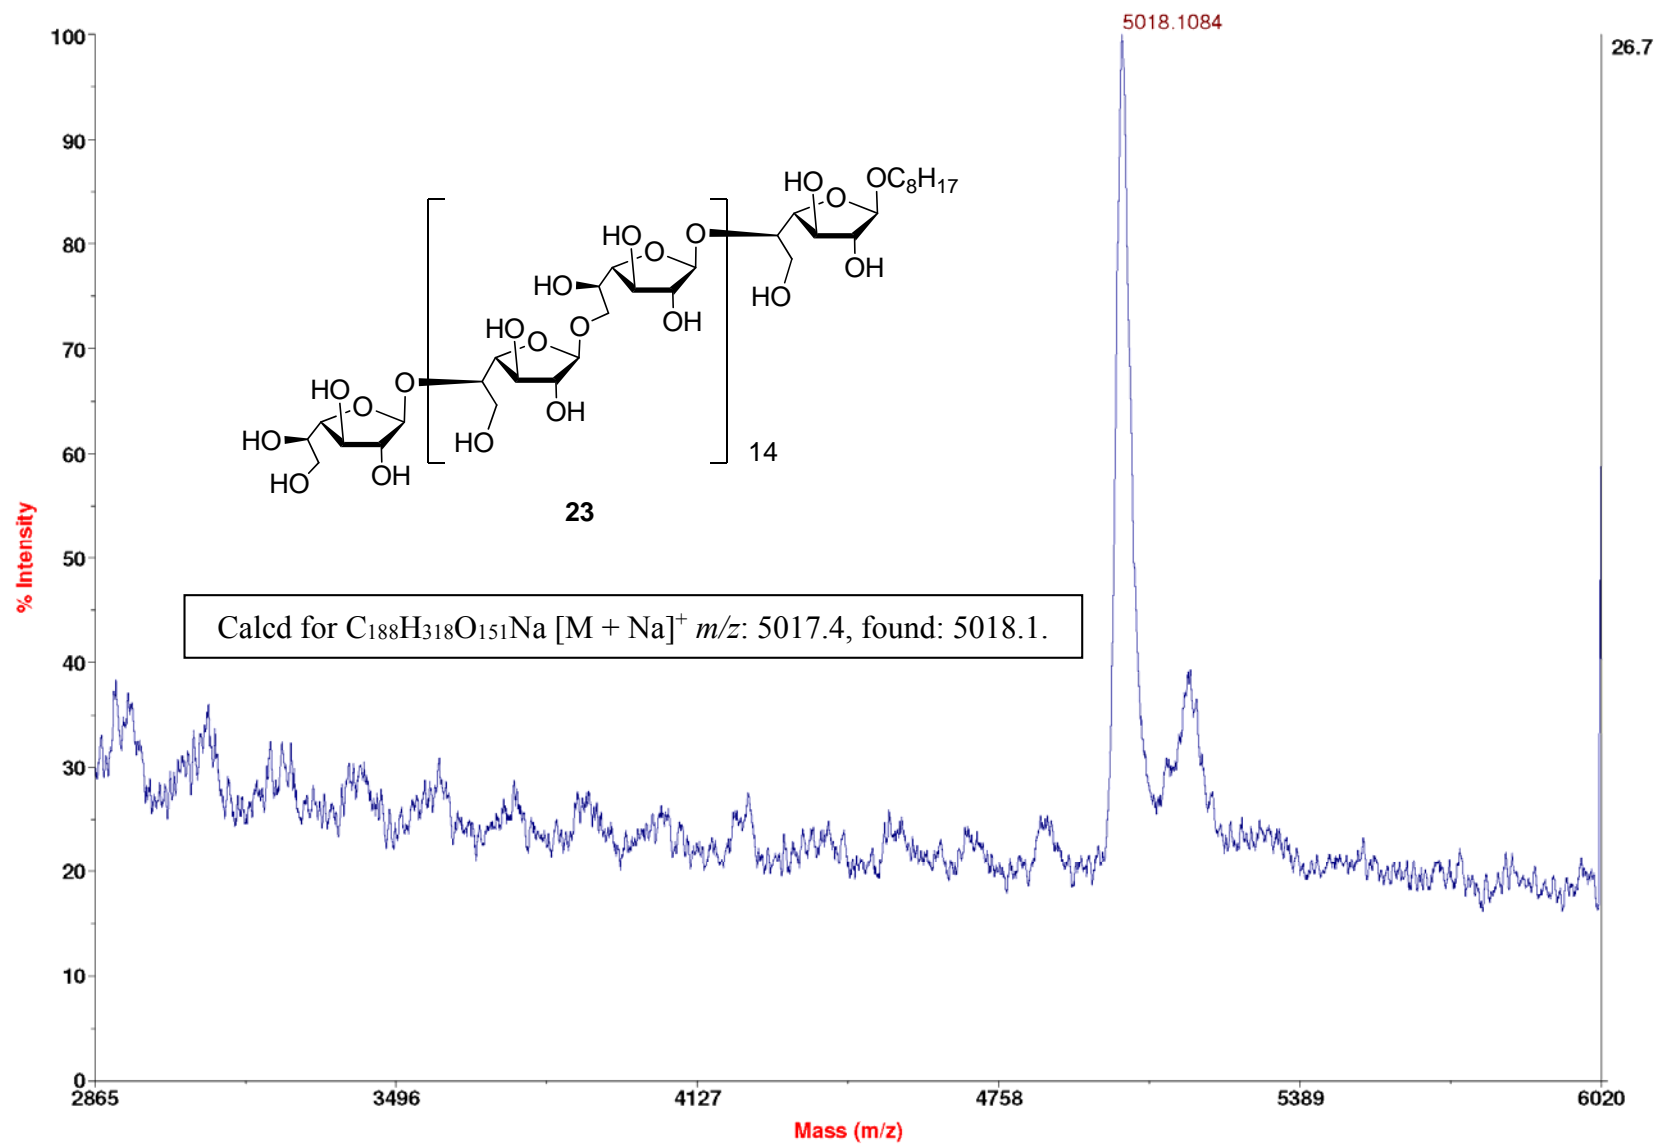

C:\AB SCIEX\TOFTOF Data\ExportT2D\zhong\20160223-1766\M4\_LINEAR.t2d

Printed: 15:30, May 09, 2016

Supplementary Figure 42. MALDI-TOF MS spectrum of compound 23

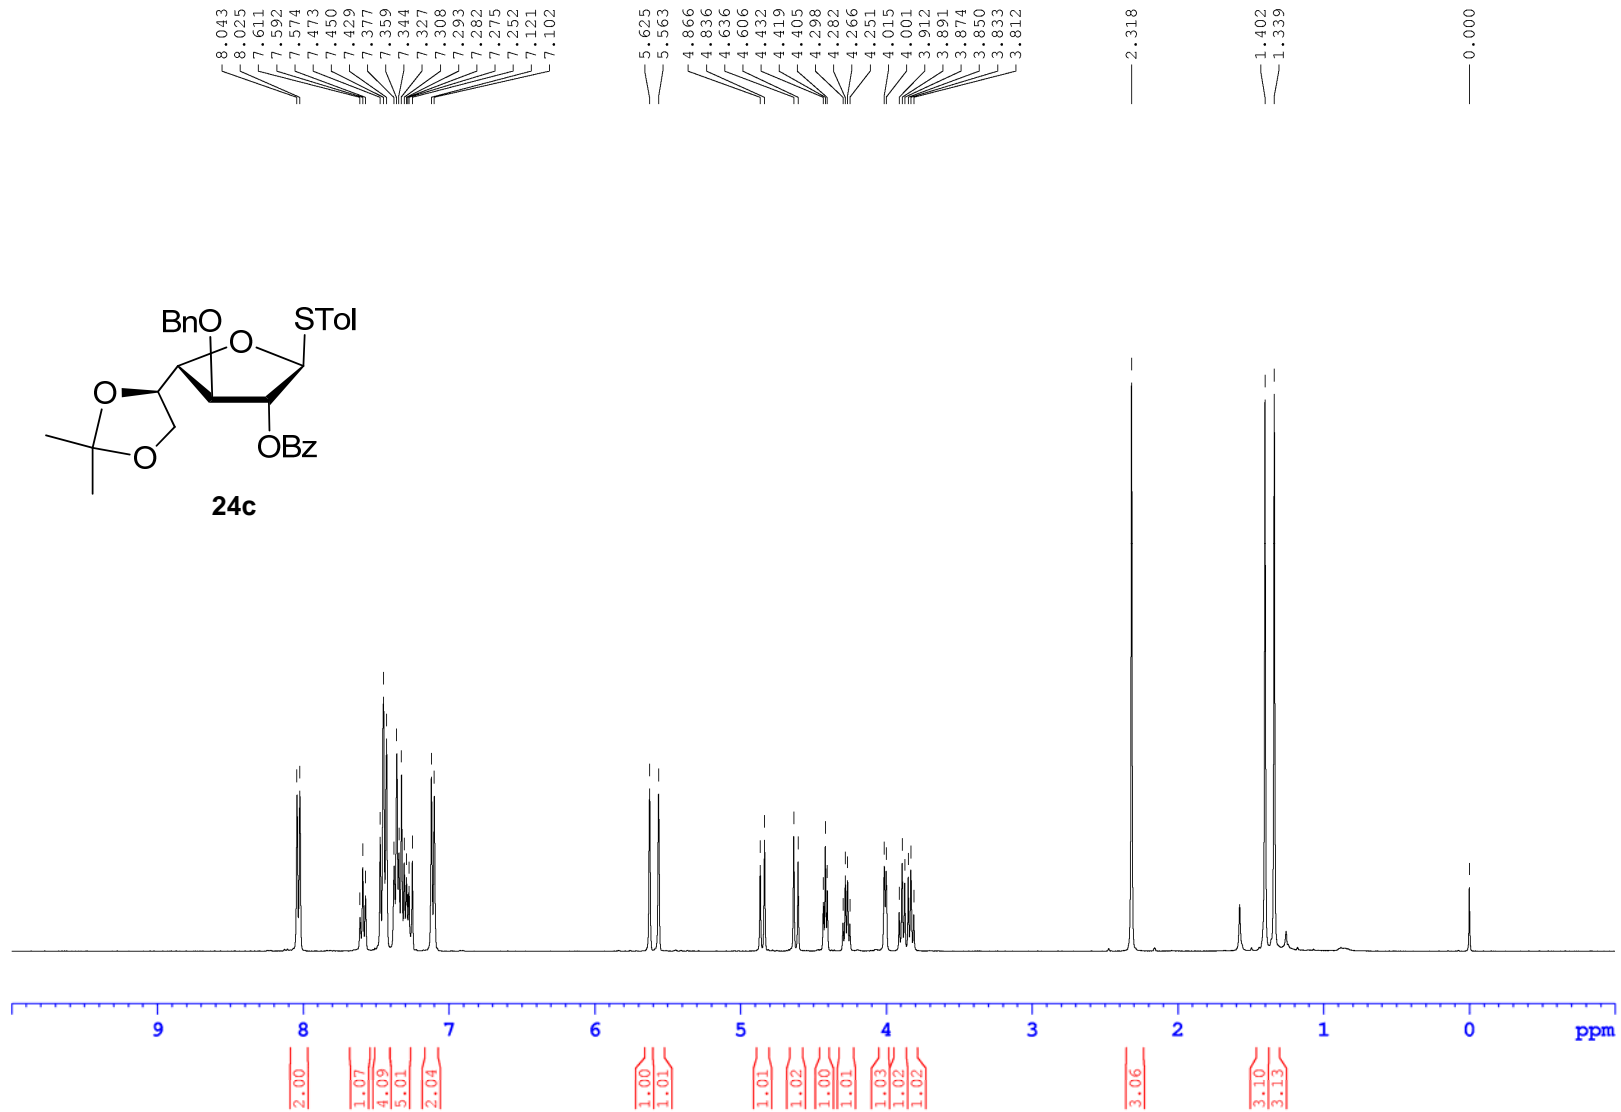

Supplementary Figure 43. <sup>1</sup>H NMR spectrum of compound 24c

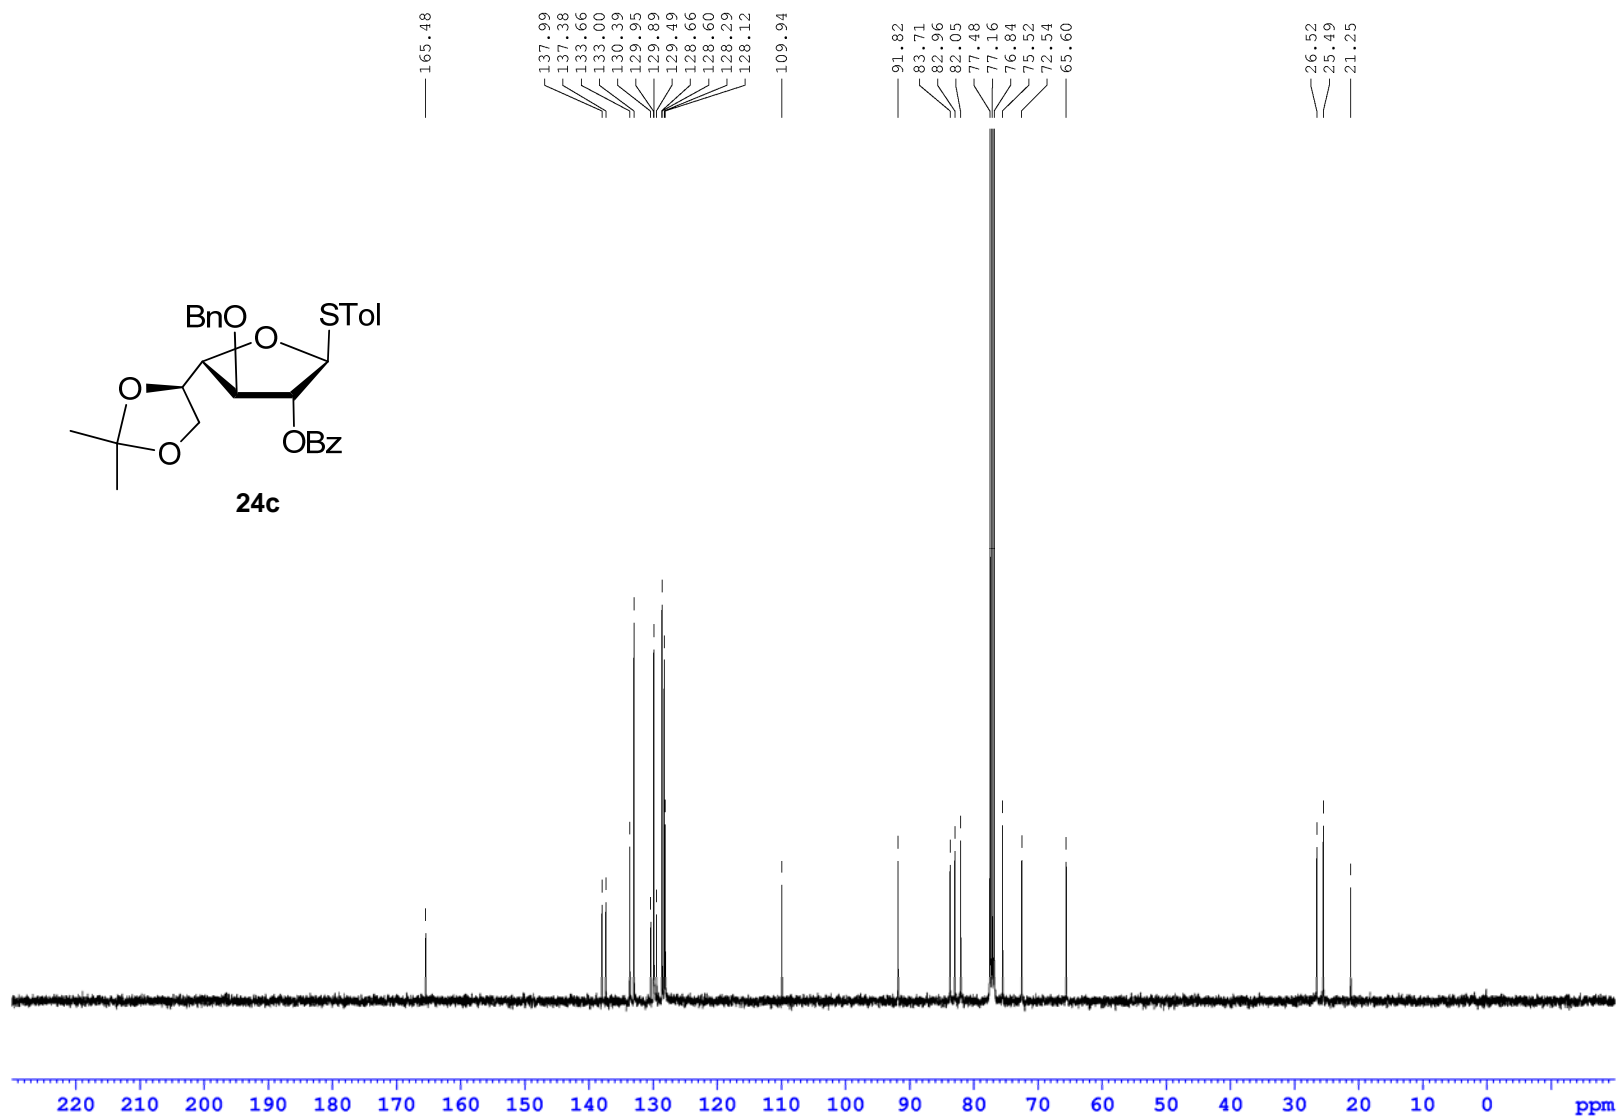

Supplementary Figure 44. <sup>13</sup>C NMR spectrum of compound 24c

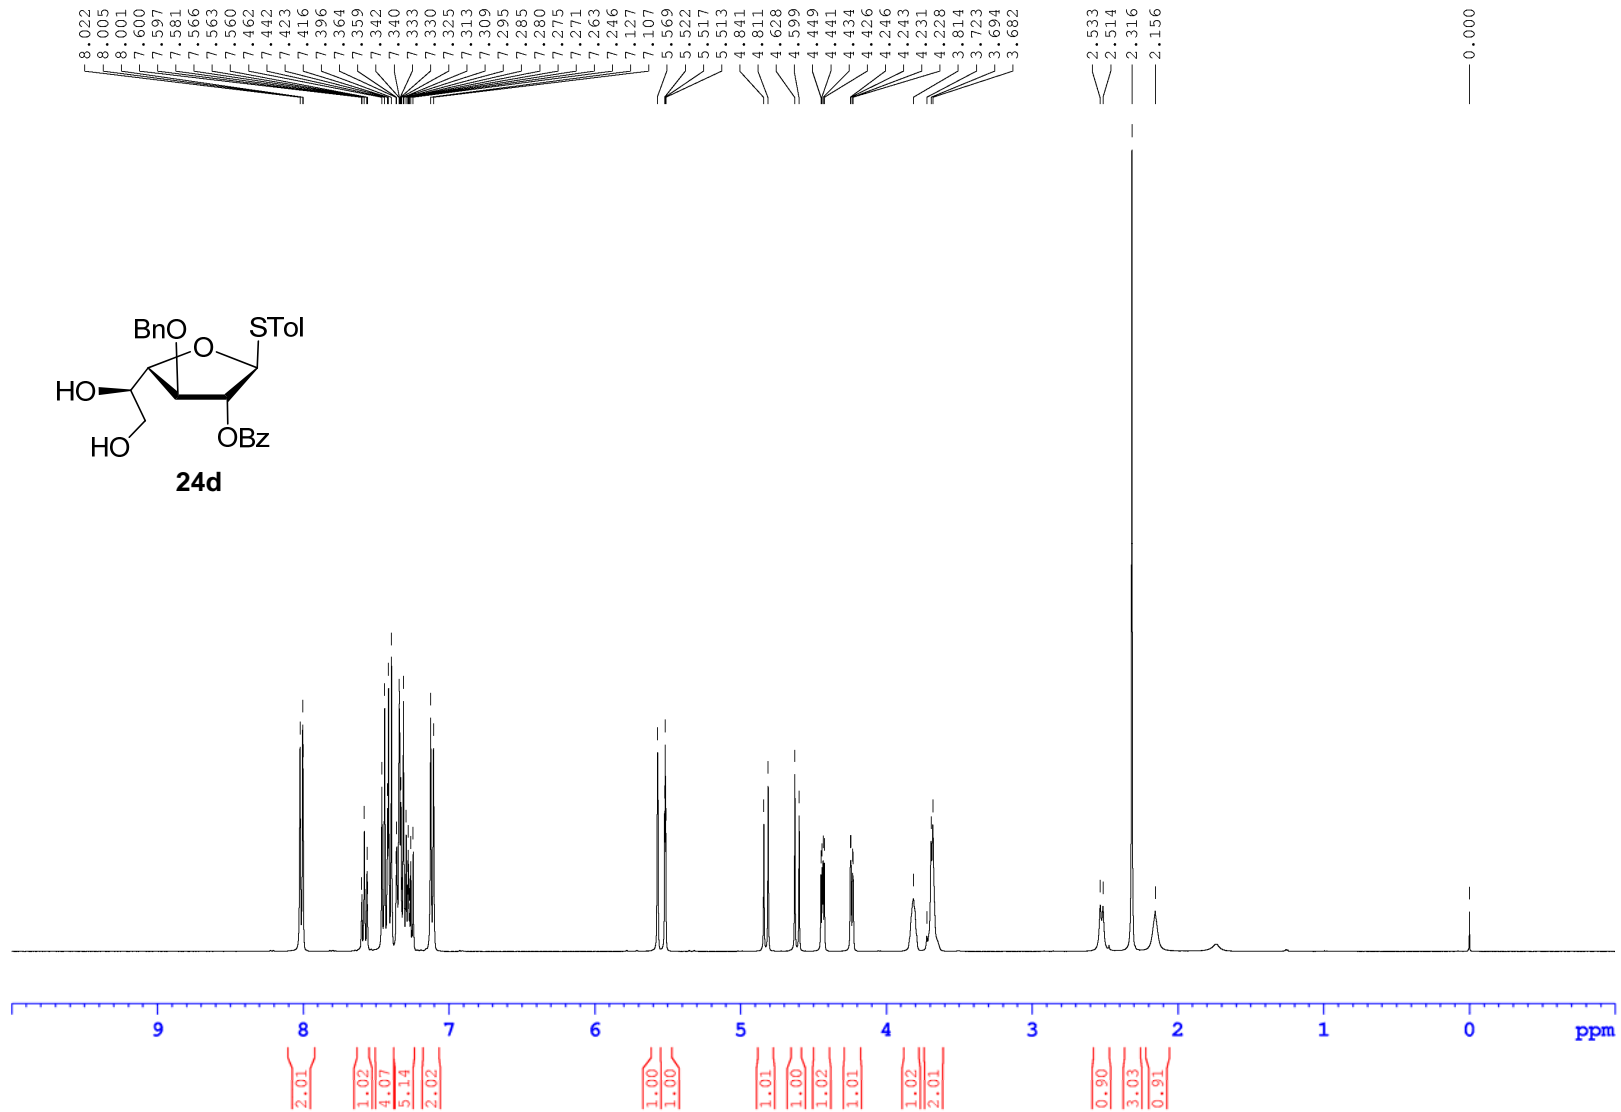

Supplementary Figure 45. <sup>1</sup>H NMR spectrum of compound 24d

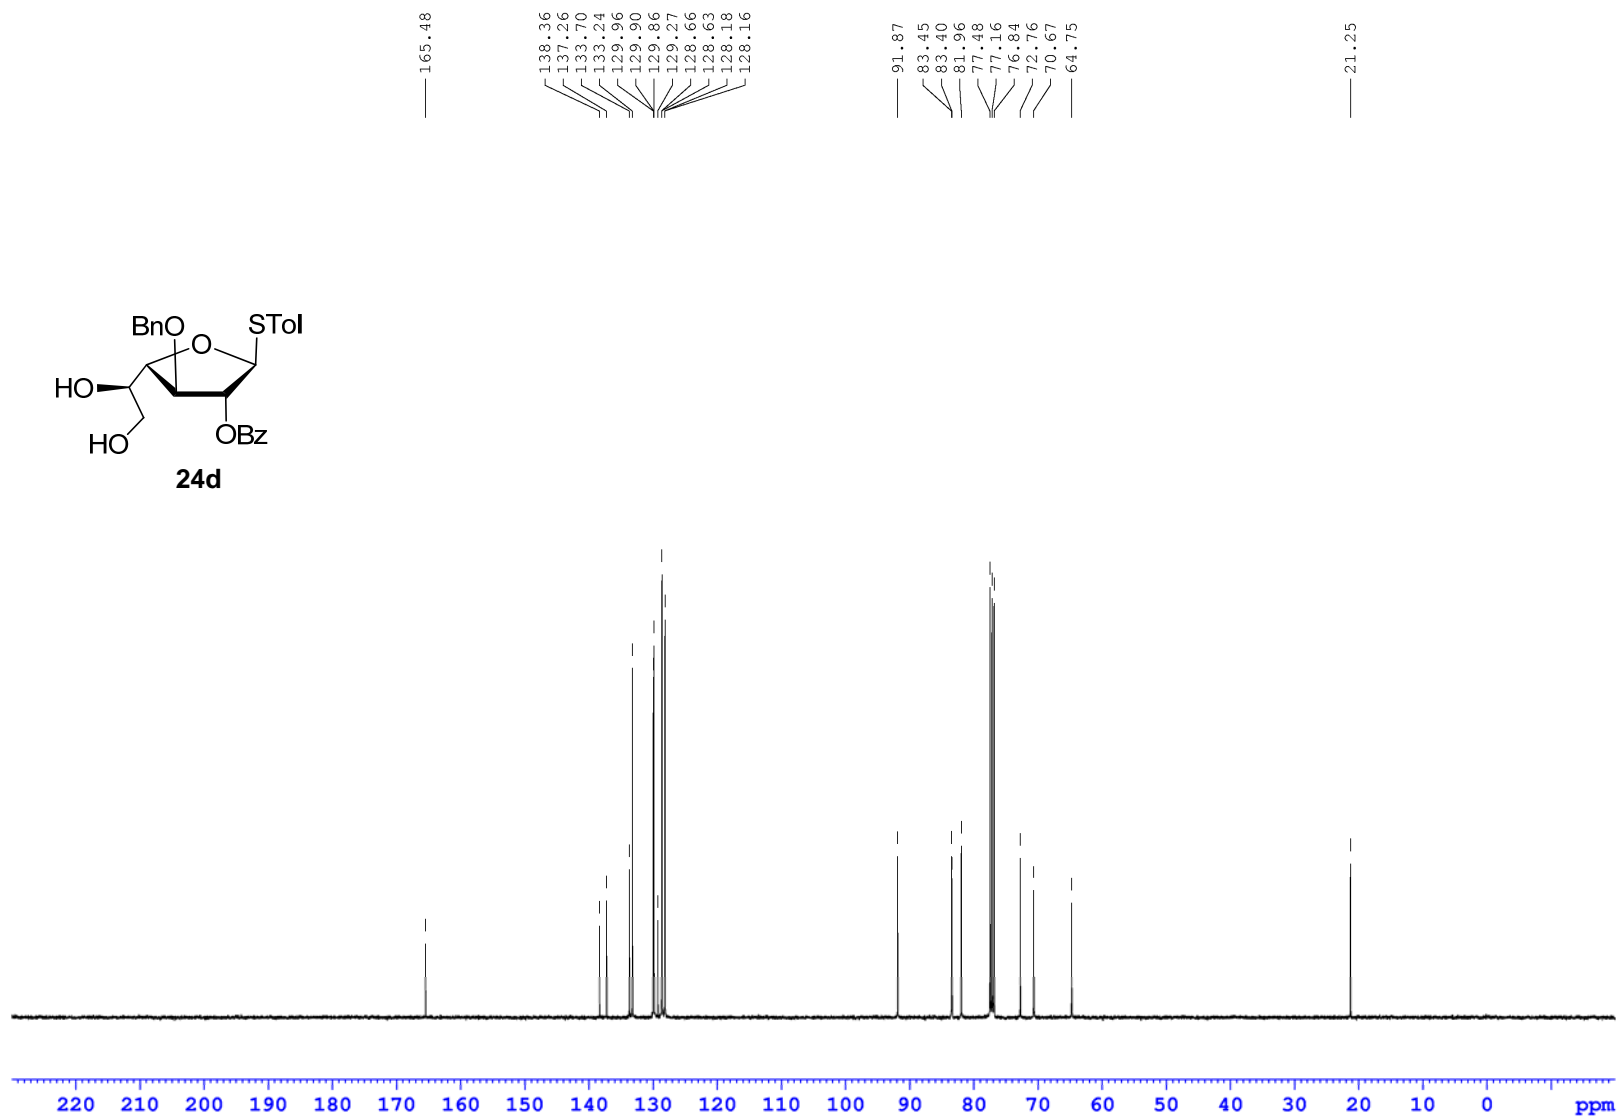

Supplementary Figure 46. <sup>13</sup>C NMR spectrum of compound 24d

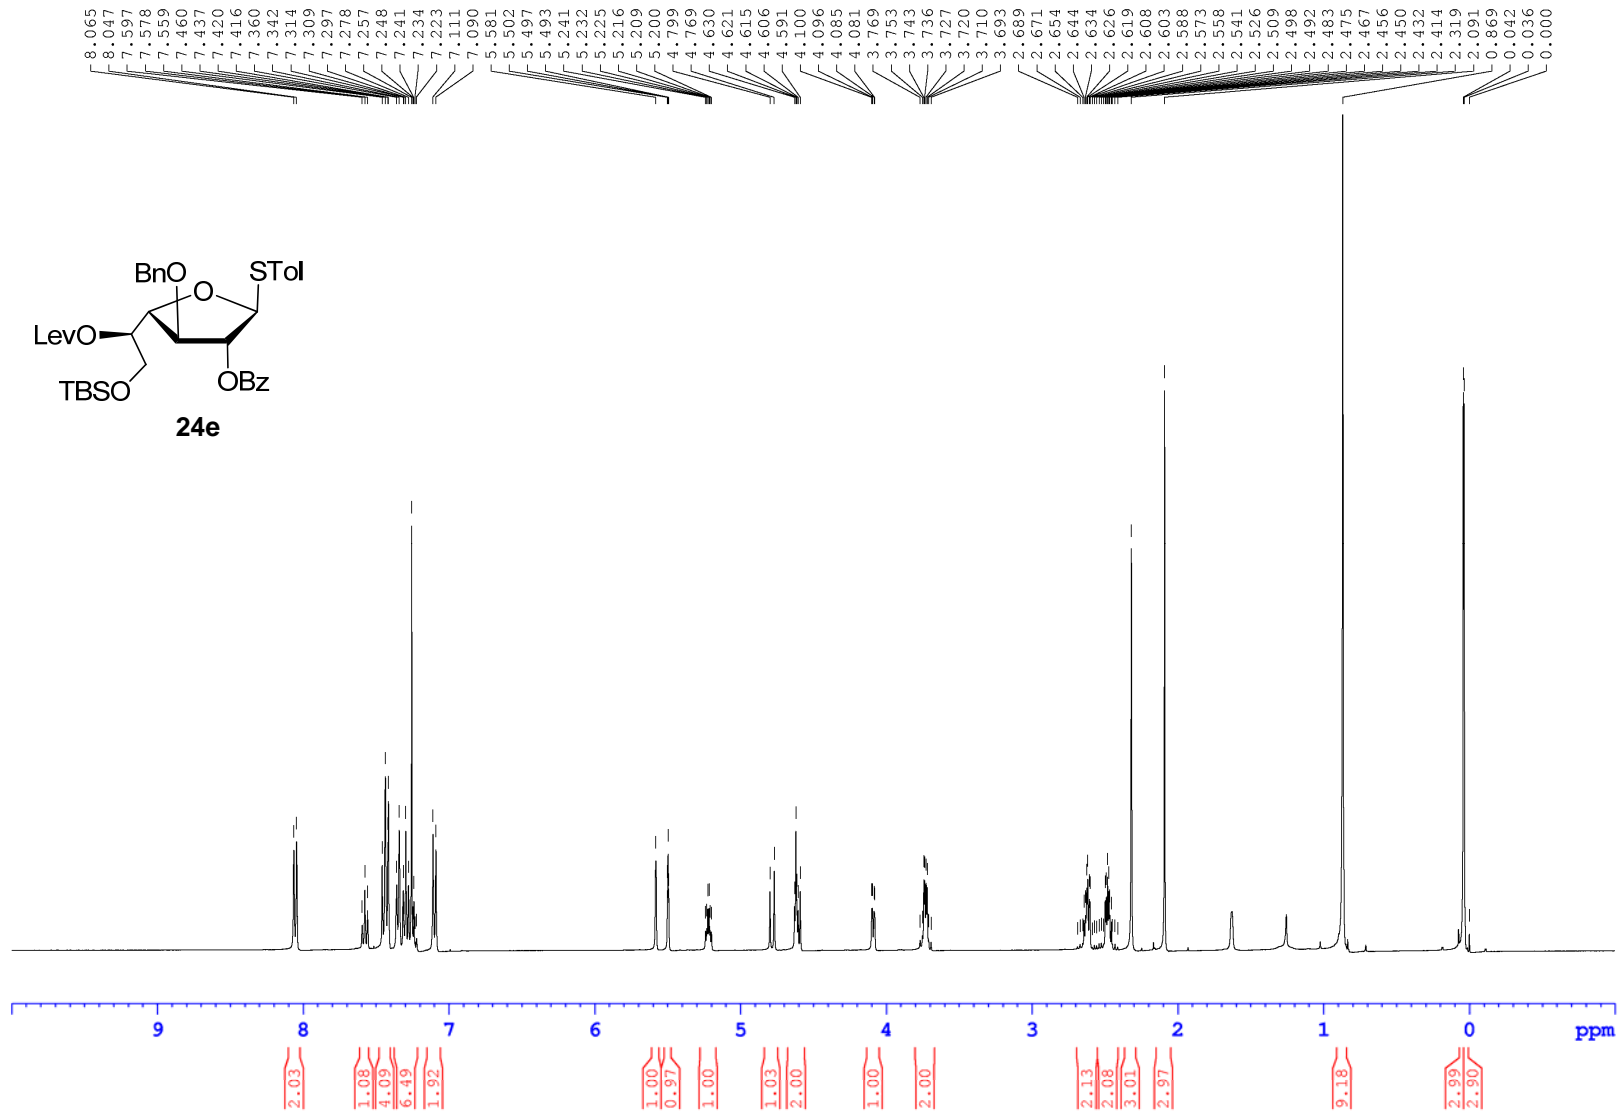

Supplementary Figure 47. <sup>1</sup>H NMR spectrum of compound 24e

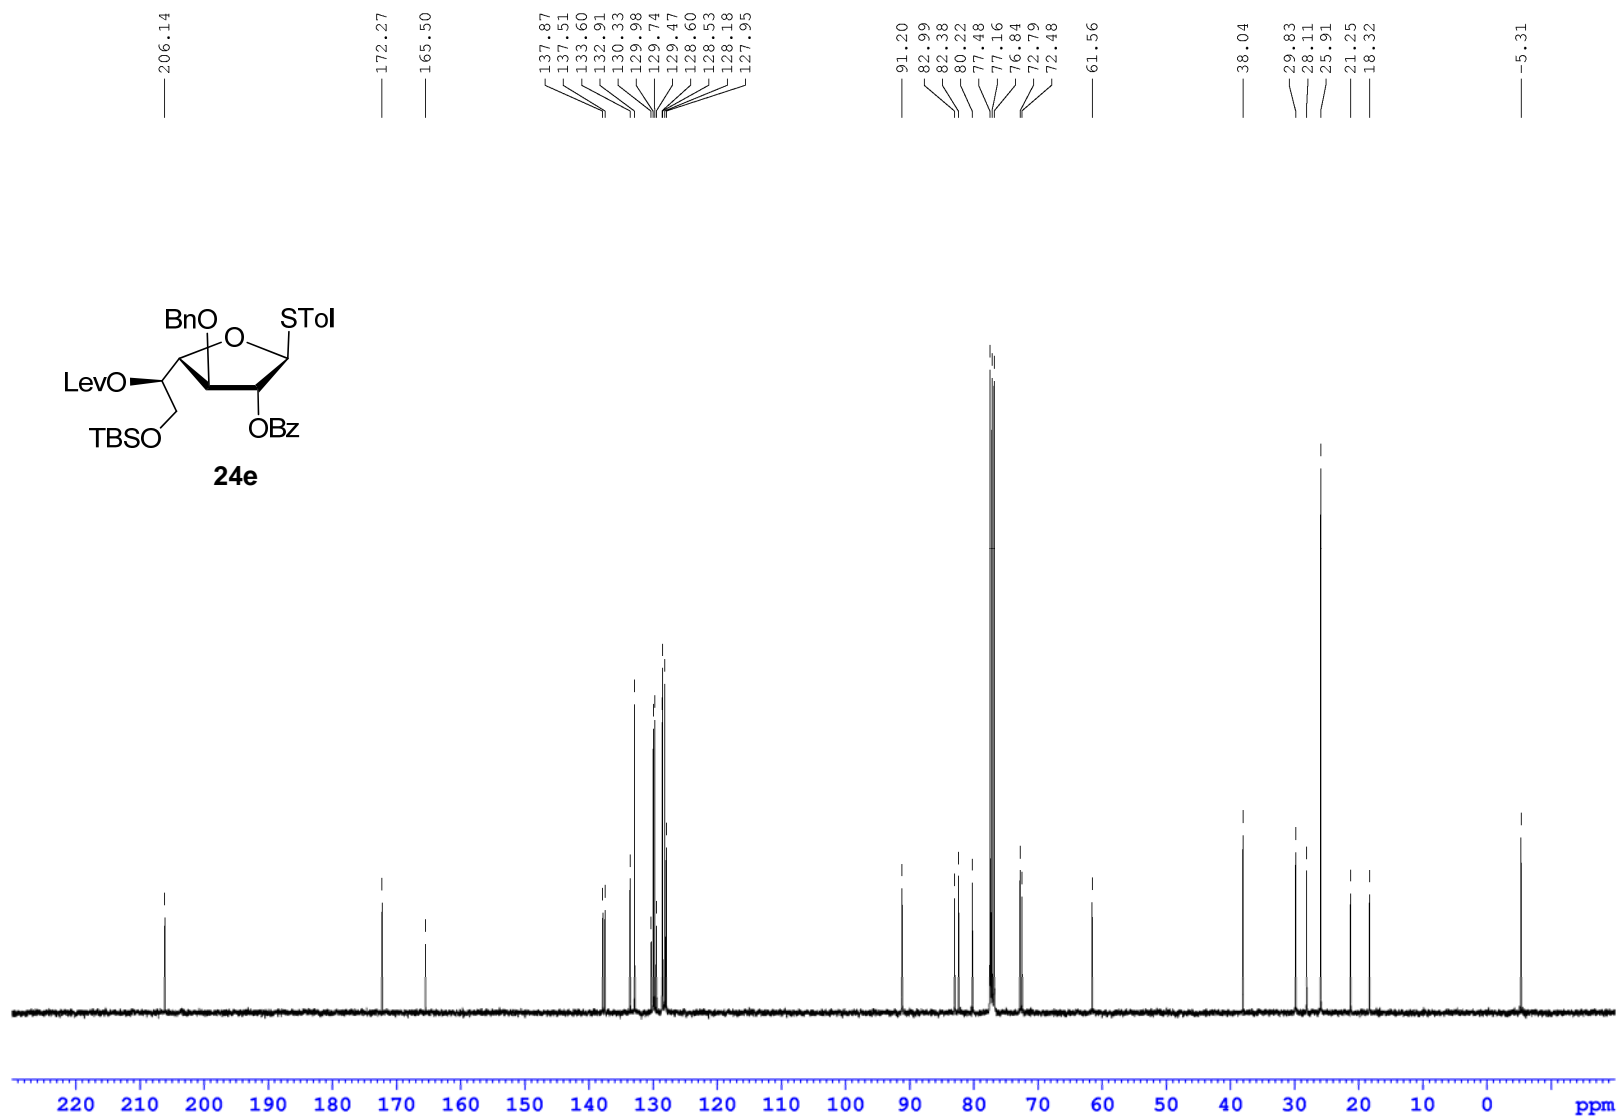

Supplementary Figure 48. <sup>13</sup>C NMR spectrum of compound 24e



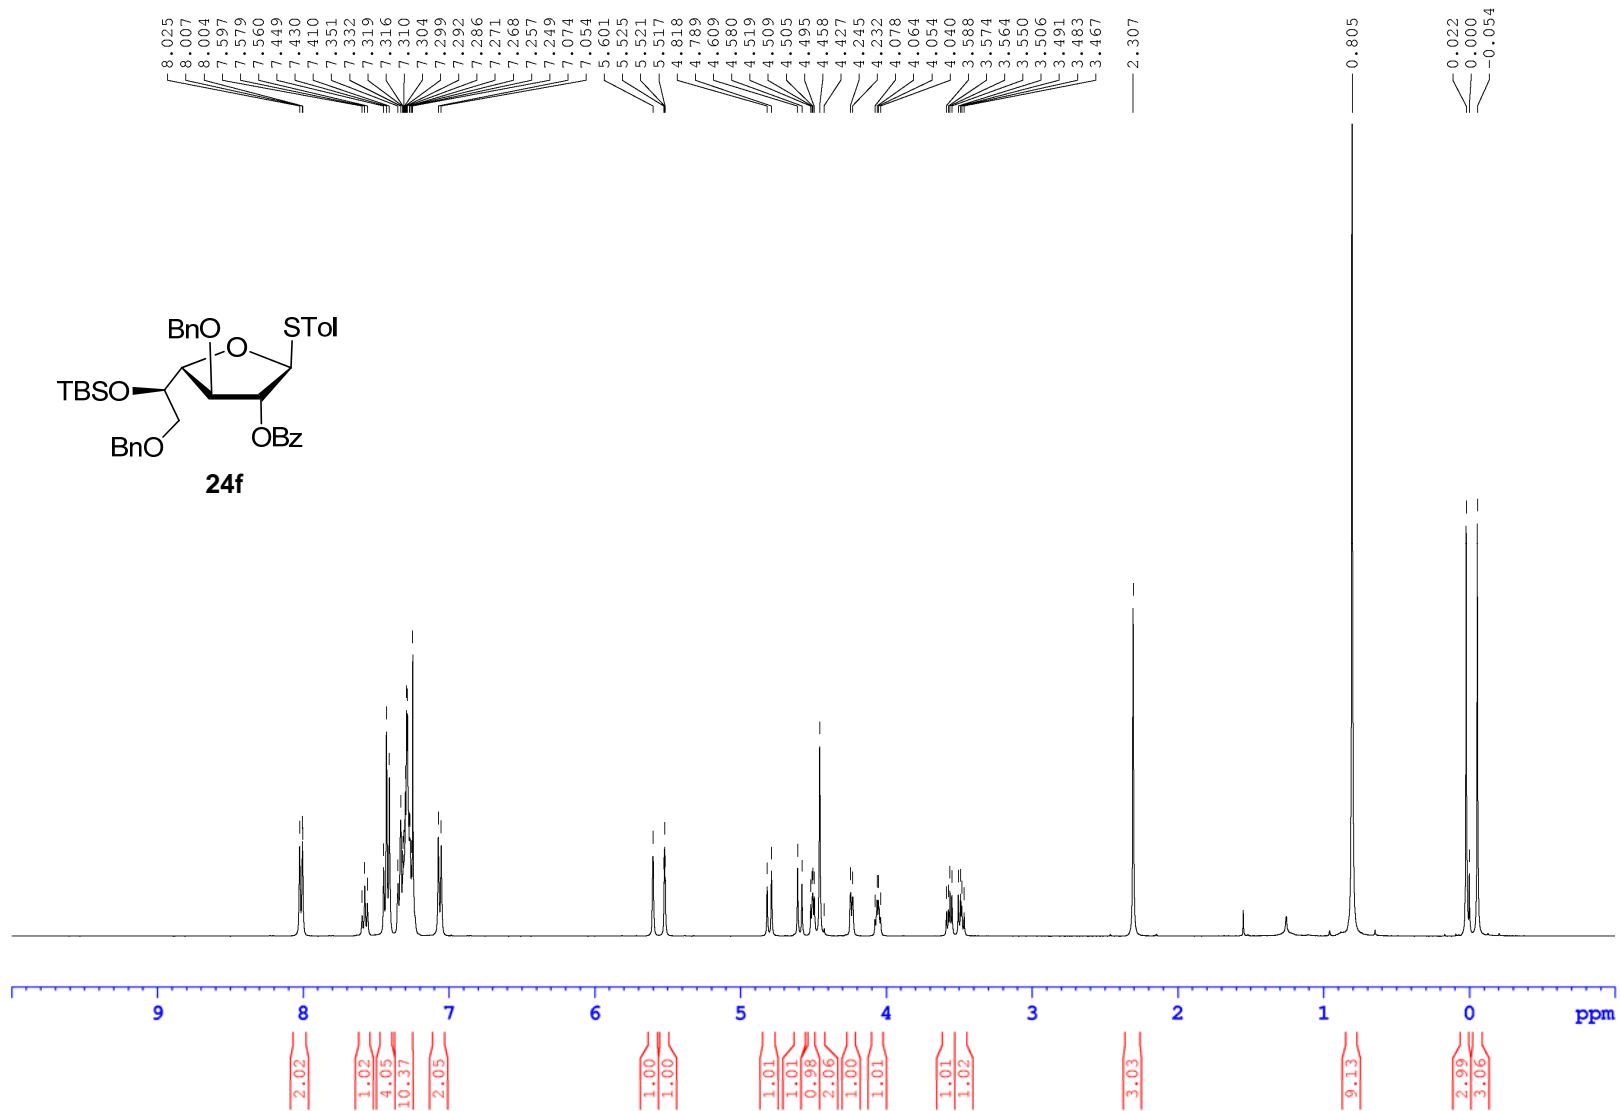

Supplementary Figure 49. <sup>1</sup>H NMR spectrum of compound 24f

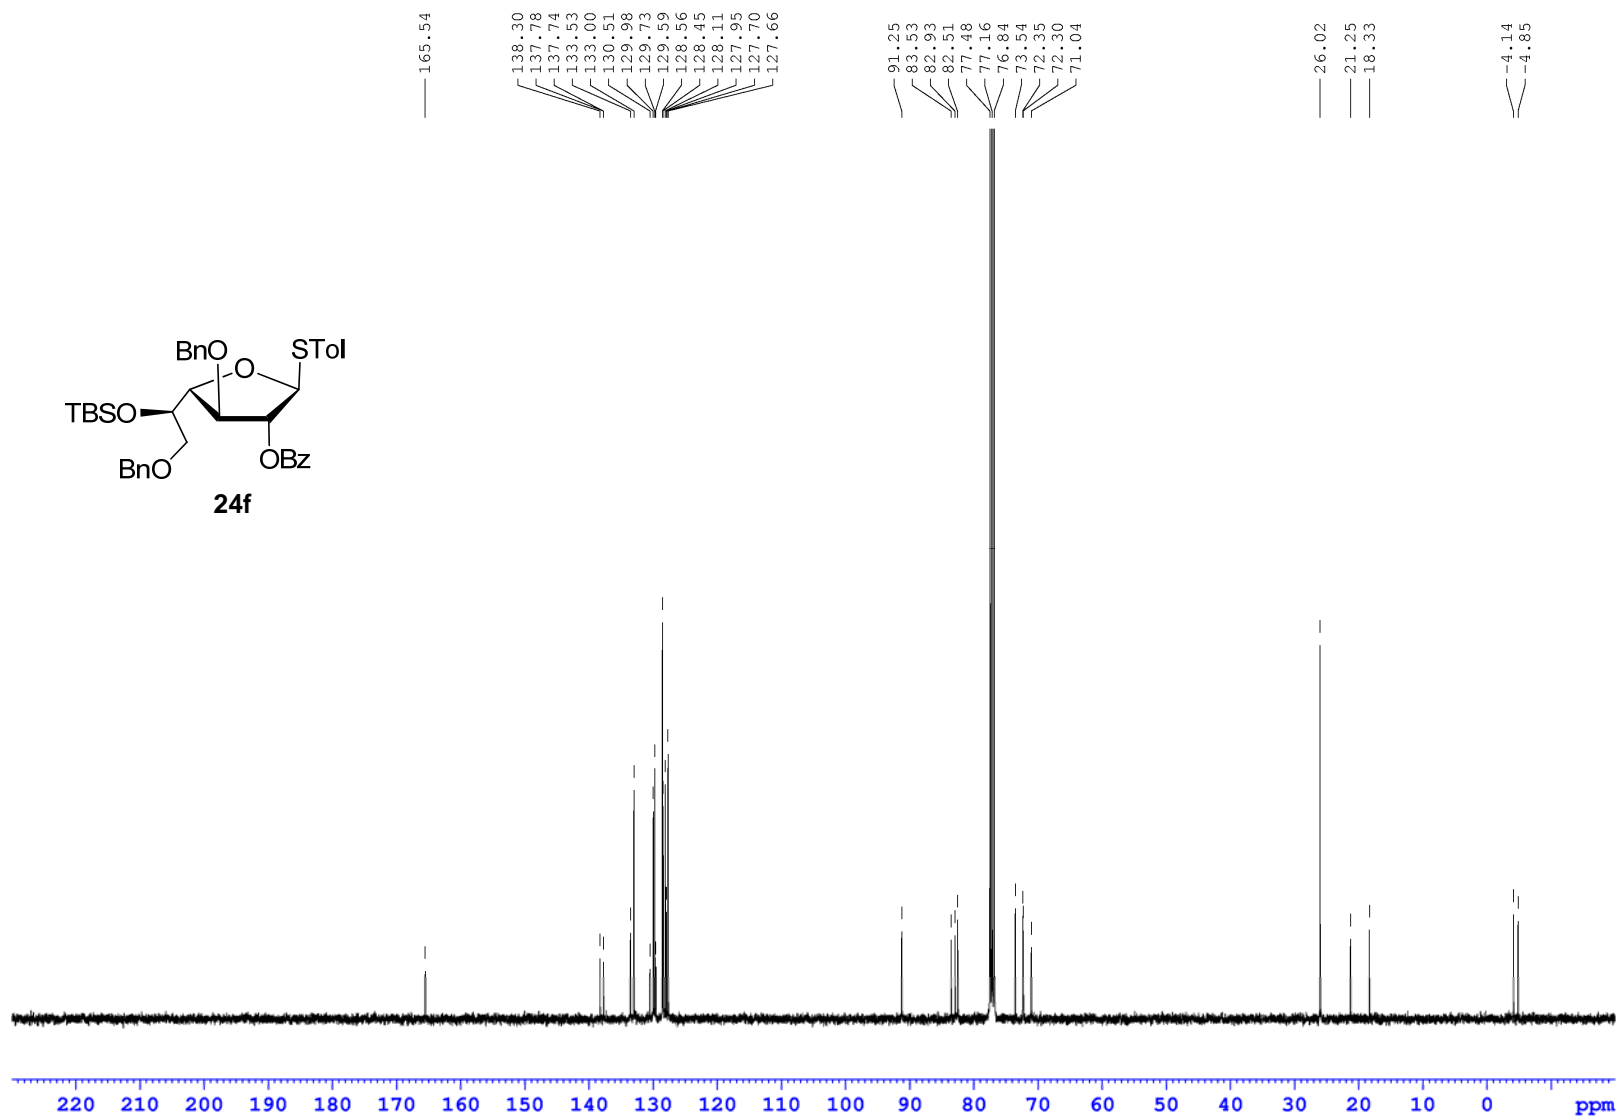

Supplementary Figure 50. <sup>13</sup>C NMR spectrum of compound 24f

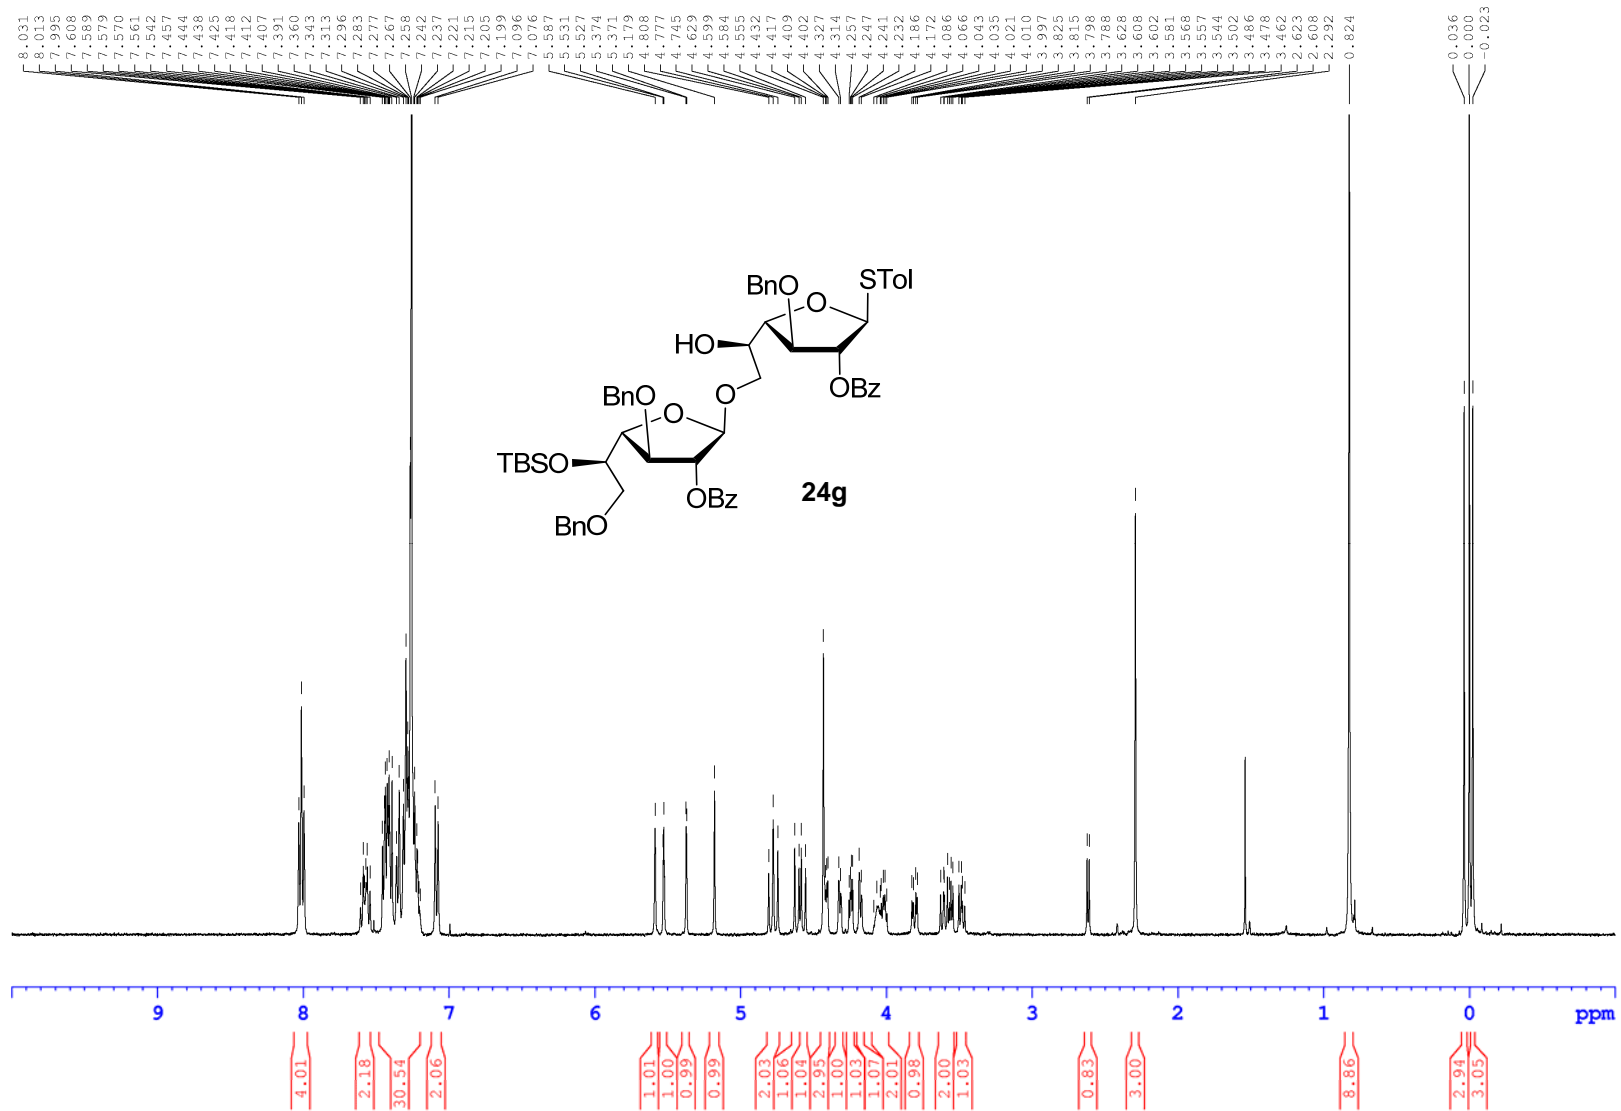

Supplementary Figure 51.  $^1\text{H}$  NMR spectrum of compound 24g

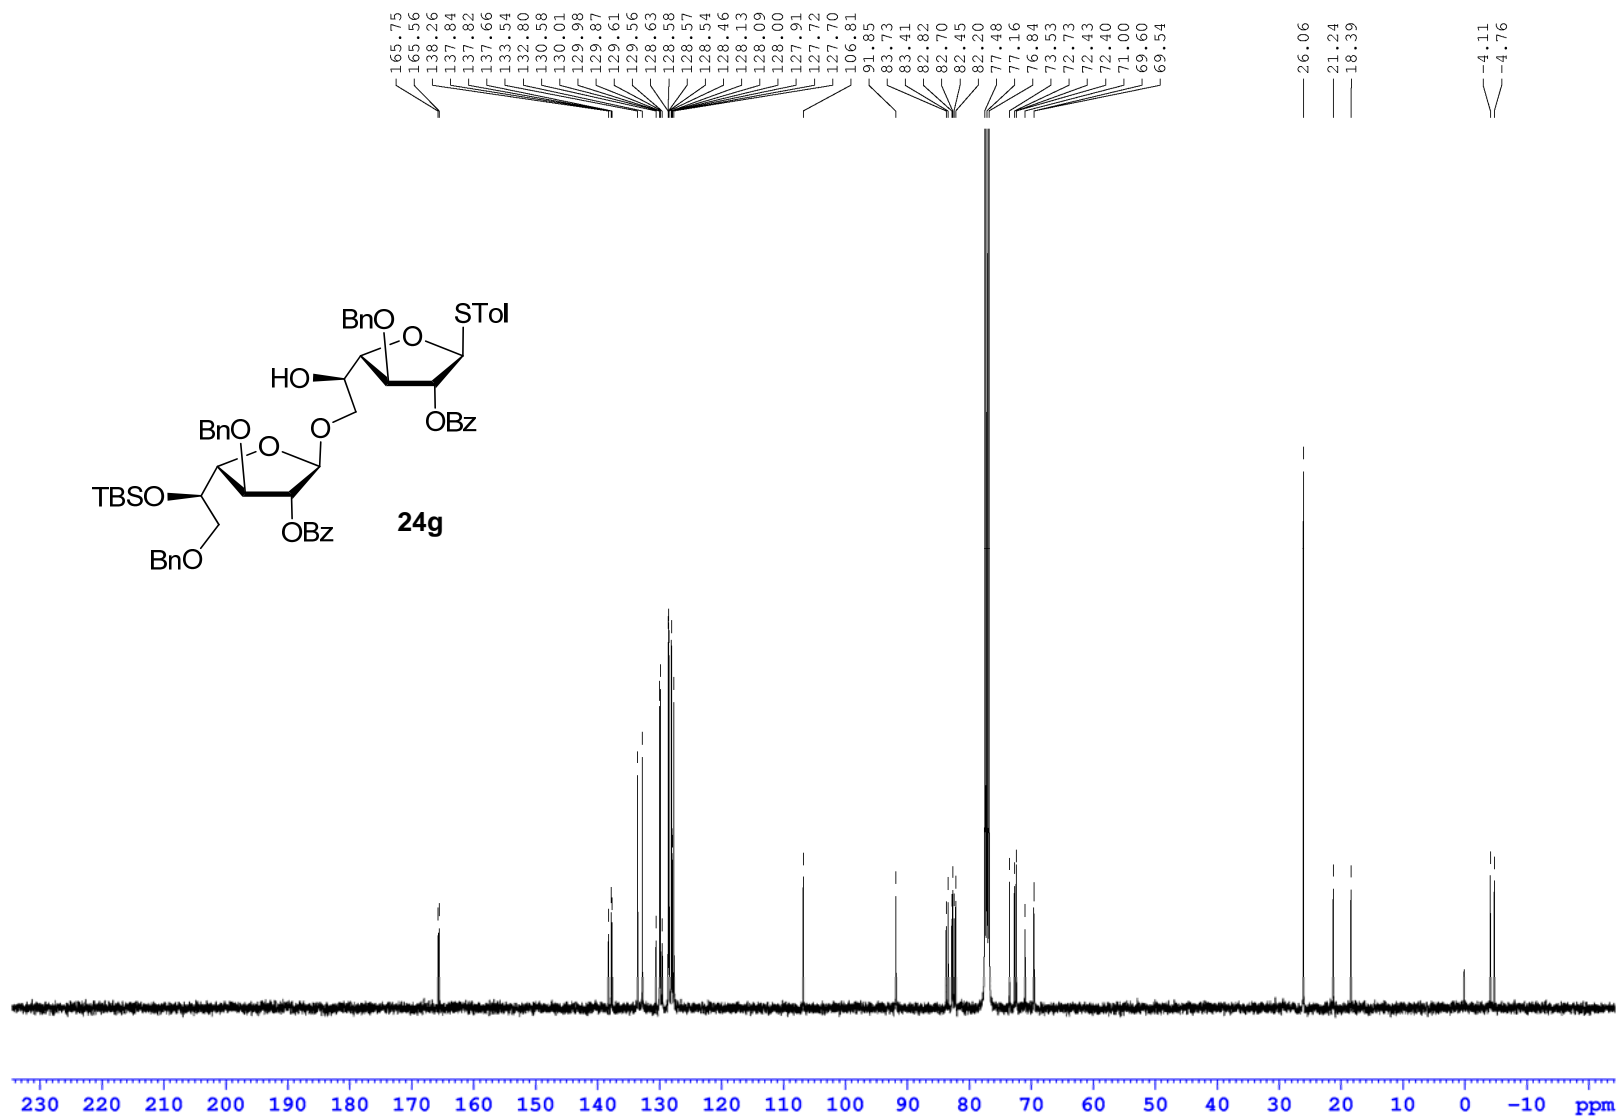

Supplementary Figure 52.  $^{13}\text{C}$  NMR spectrum of compound 24g

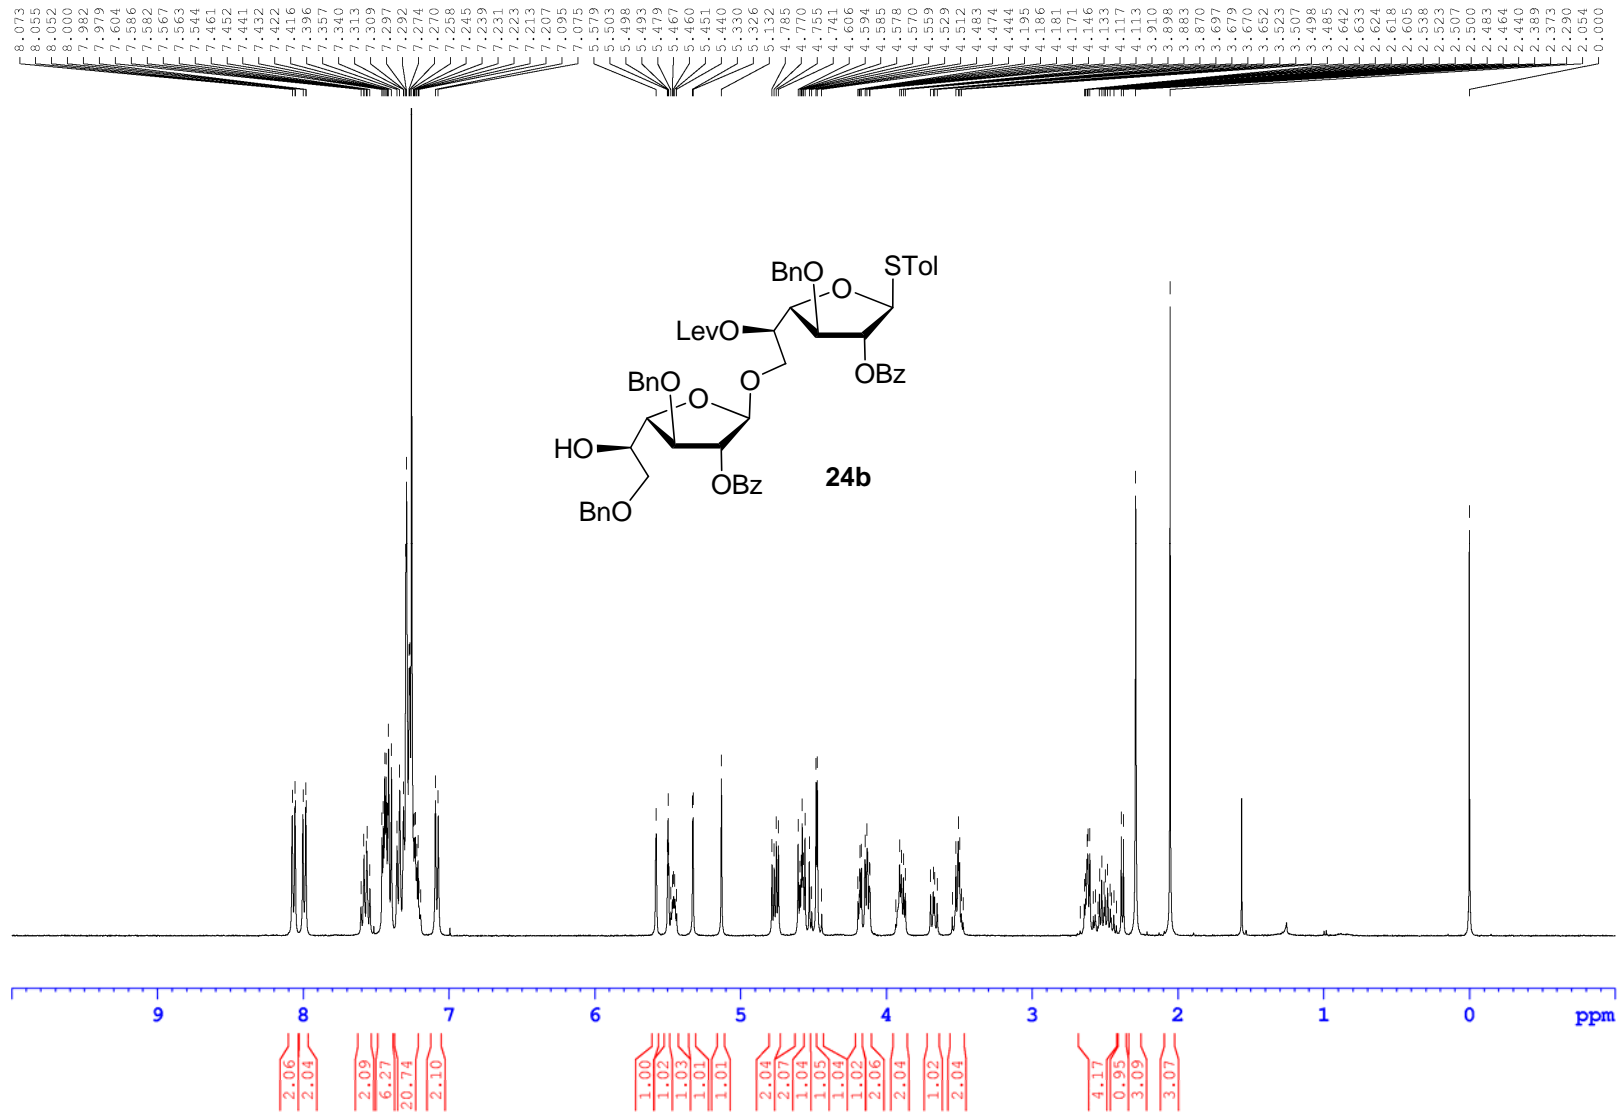

Supplementary Figure 53. <sup>1</sup>H NMR spectrum of compound 24b

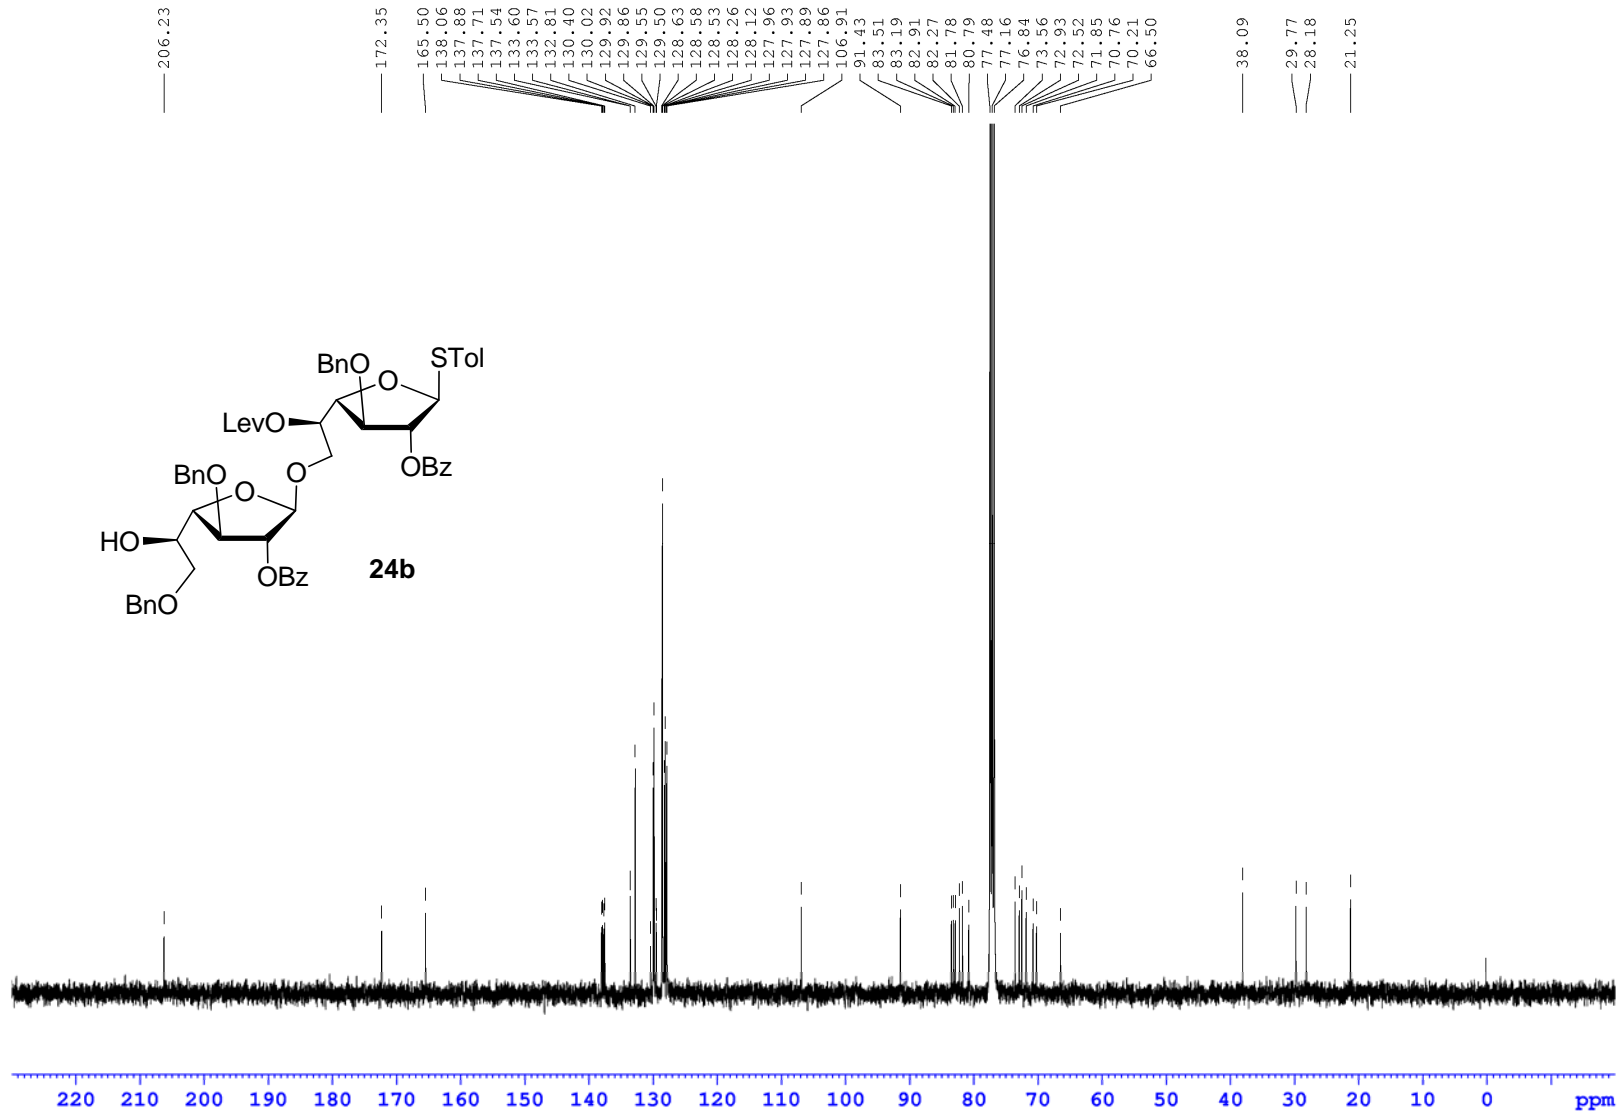

Supplementary Figure 54. <sup>13</sup>C NMR spectrum of compound 24b

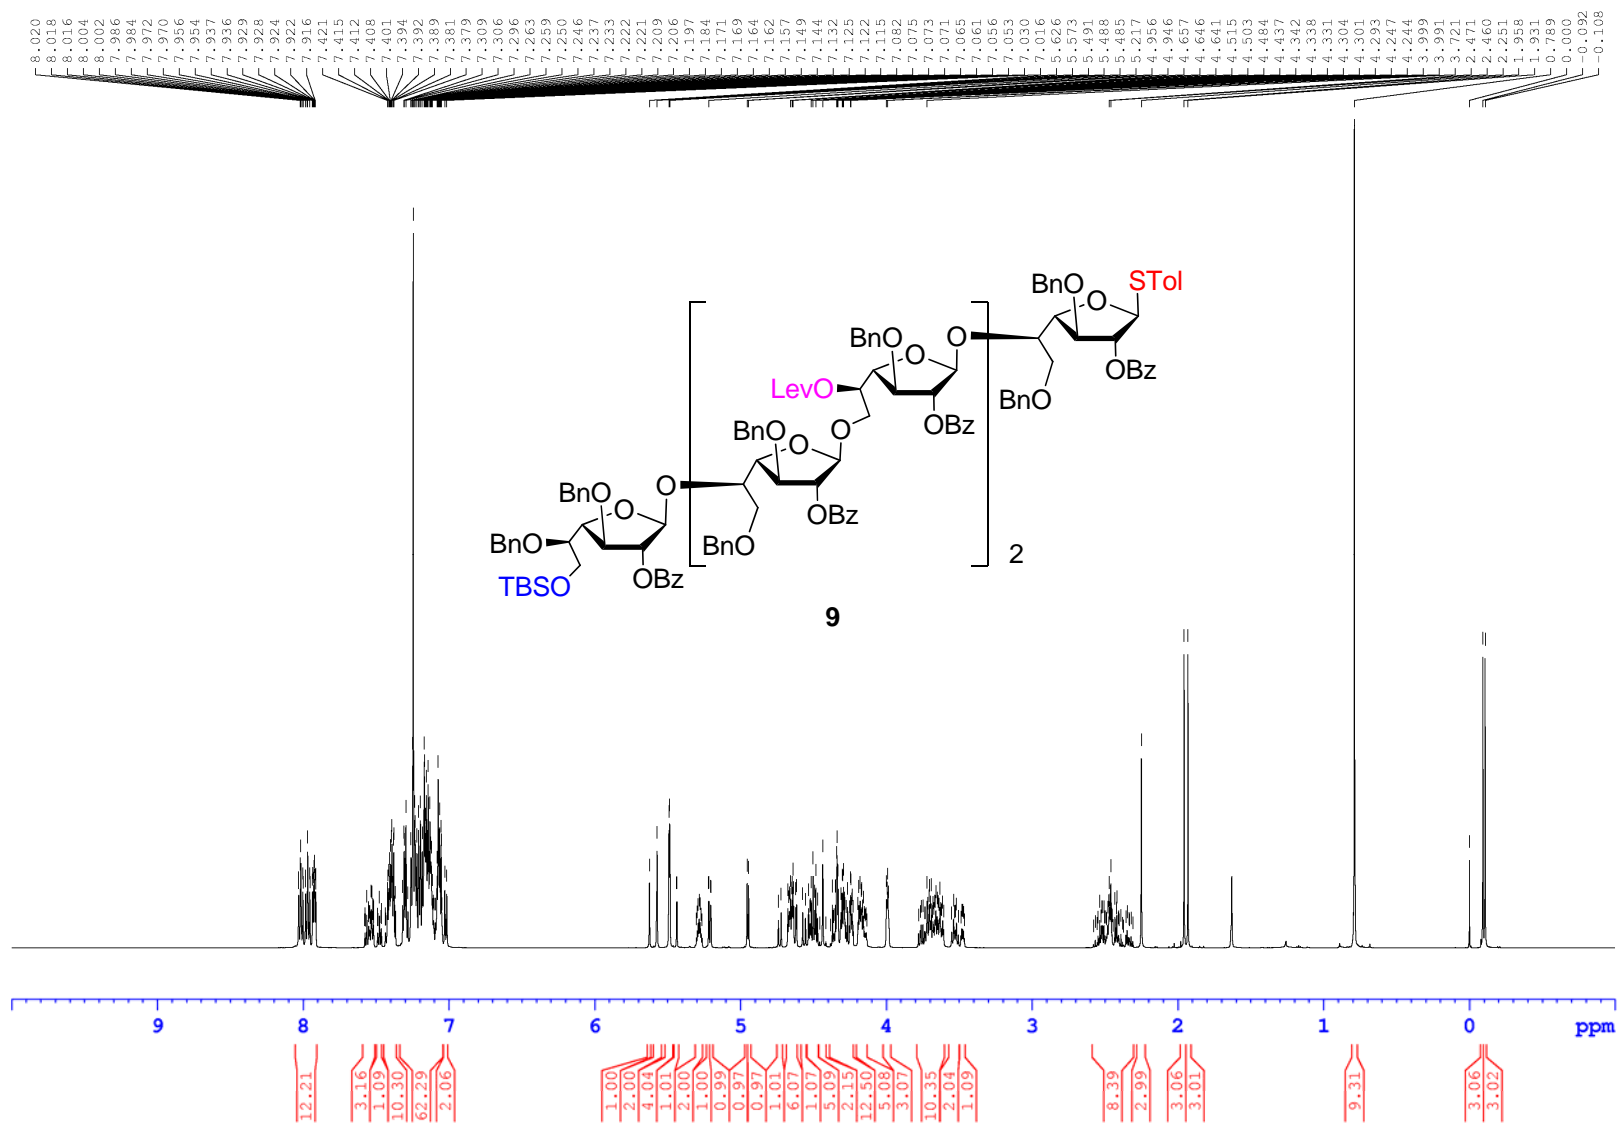

Supplementary Figure 55. <sup>1</sup>H NMR spectrum of compound 9

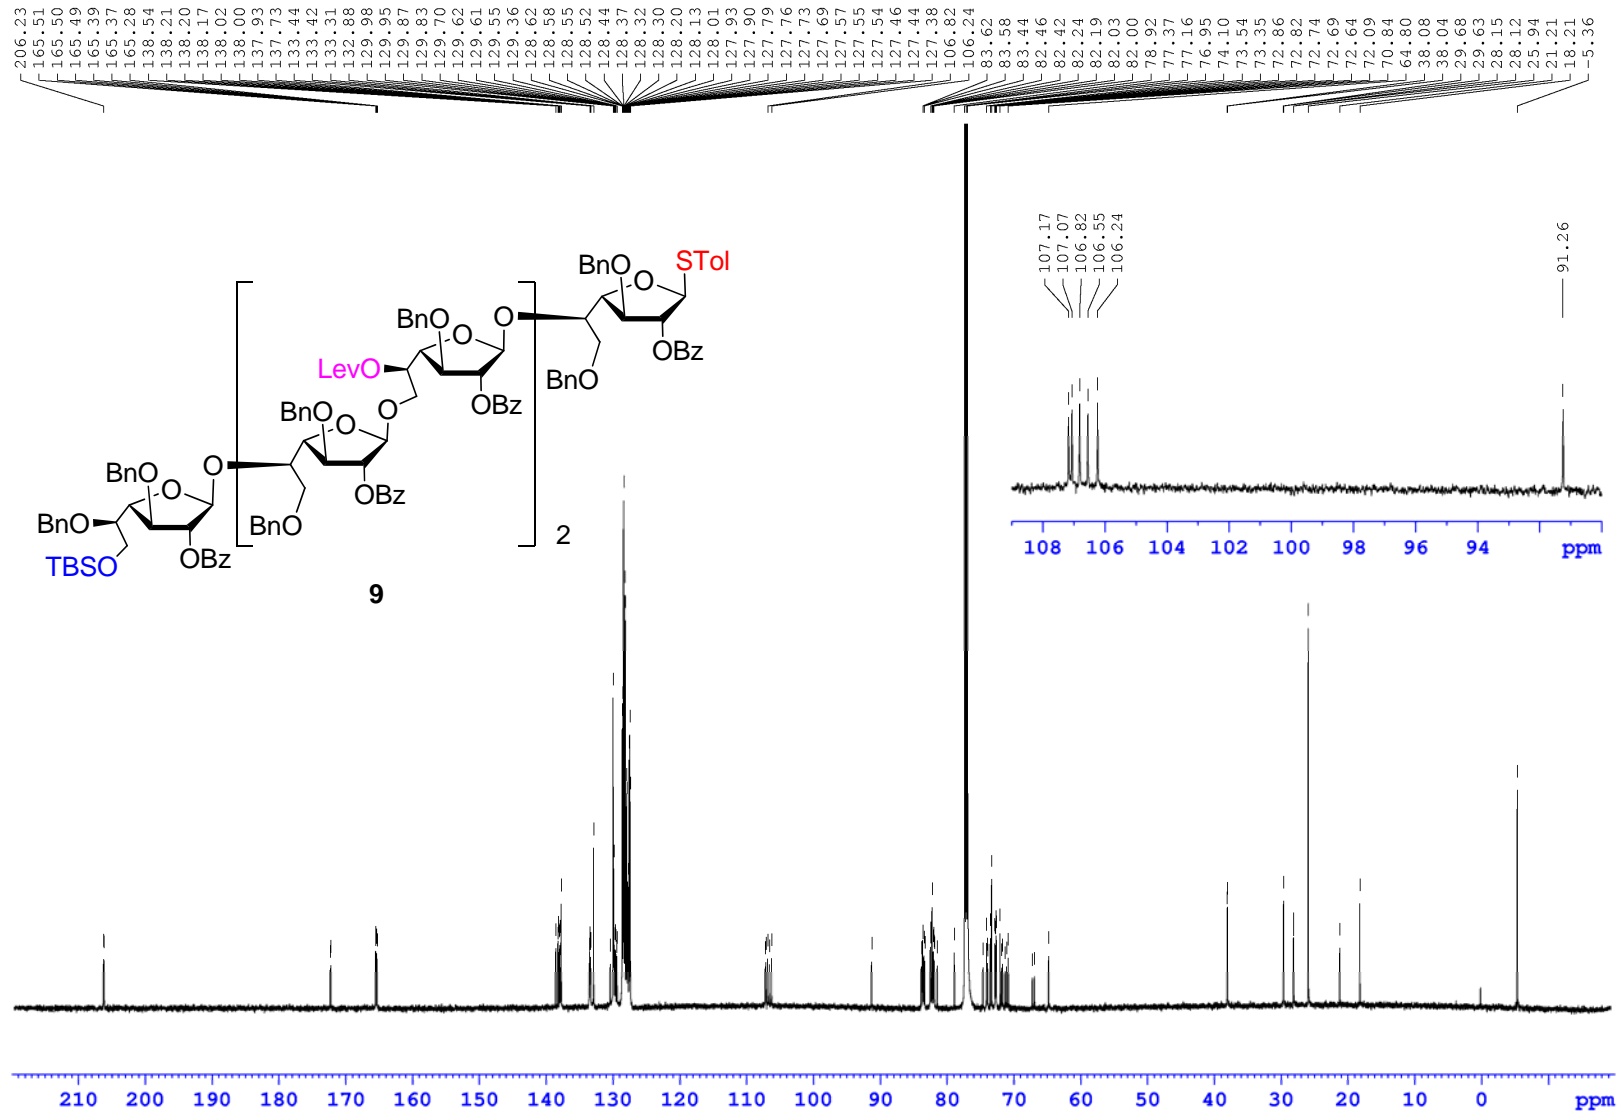

Supplementary Figure 56. <sup>13</sup>C NMR spectrum of compound 9



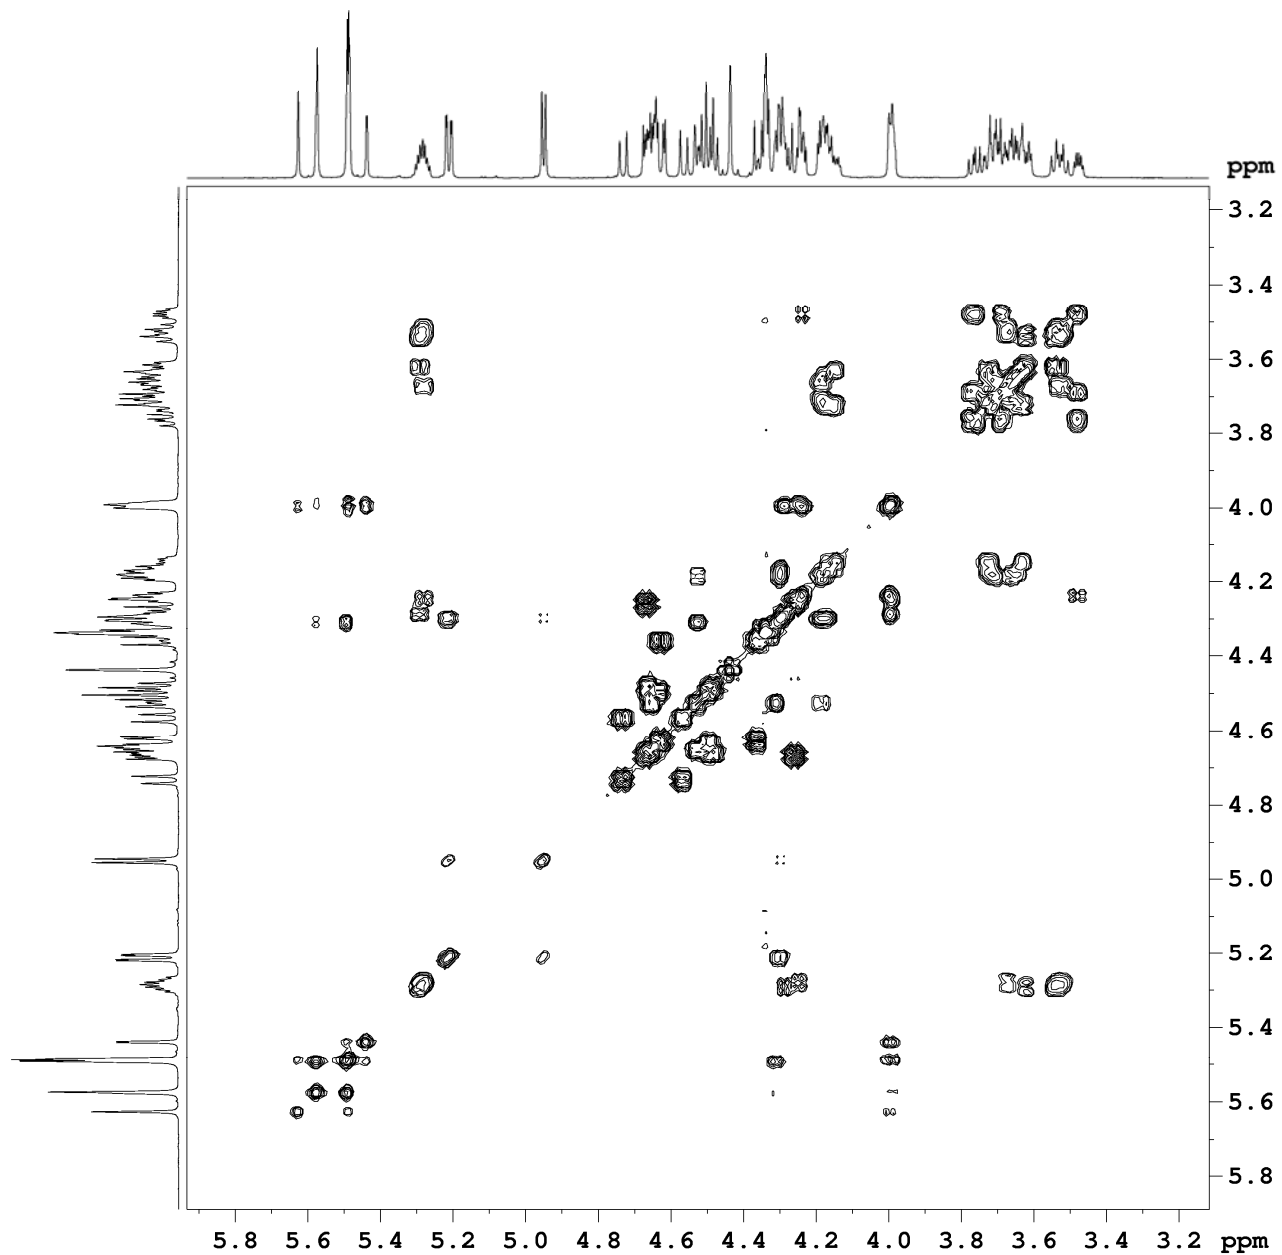

```

NAME          WY-0601
EXPNO         3
PROCNO        1
Date_         20160414
Time          11.48
INSTRUM       spect
PROBHD        5 mm CPTCI 1H-
PULPROG       cosygpmfzf
TD            2048
SOLVENT       CDC13
NS            4
DS            8
SWH           5980.861 Hz
FIDRES        2.920342 Hz
AQ            0.1712628 sec
RG            203
DW            83.600 usec
DE            10.00 usec
TE            300.4 K
D0            0.00000300 sec
D1            2.00000000 sec
D13           0.00000400 sec
D16           0.00020000 sec
IN0           0.00016720 sec

```

```

===== CHANNEL f1 =====
NUC1          1H
P1            12.00 usec
ND0           1
TD            1024
SFO1          600.1324 MHz
FIDRES        5.840695 Hz
SW            9.966 ppm
FnMODE        QF
SI            1024
SF            600.1300223 MHz
WDW           SINE
SSB           0
LB            0.00 Hz
GB            0
PC            1.40
SI            1024
MC2           QF
SF            600.1300223 MHz
WDW           SINE
SSB           0
LB            0.00 Hz
GB            0

```

Supplementary Figure 57. COSY NMR spectrum of compound 9

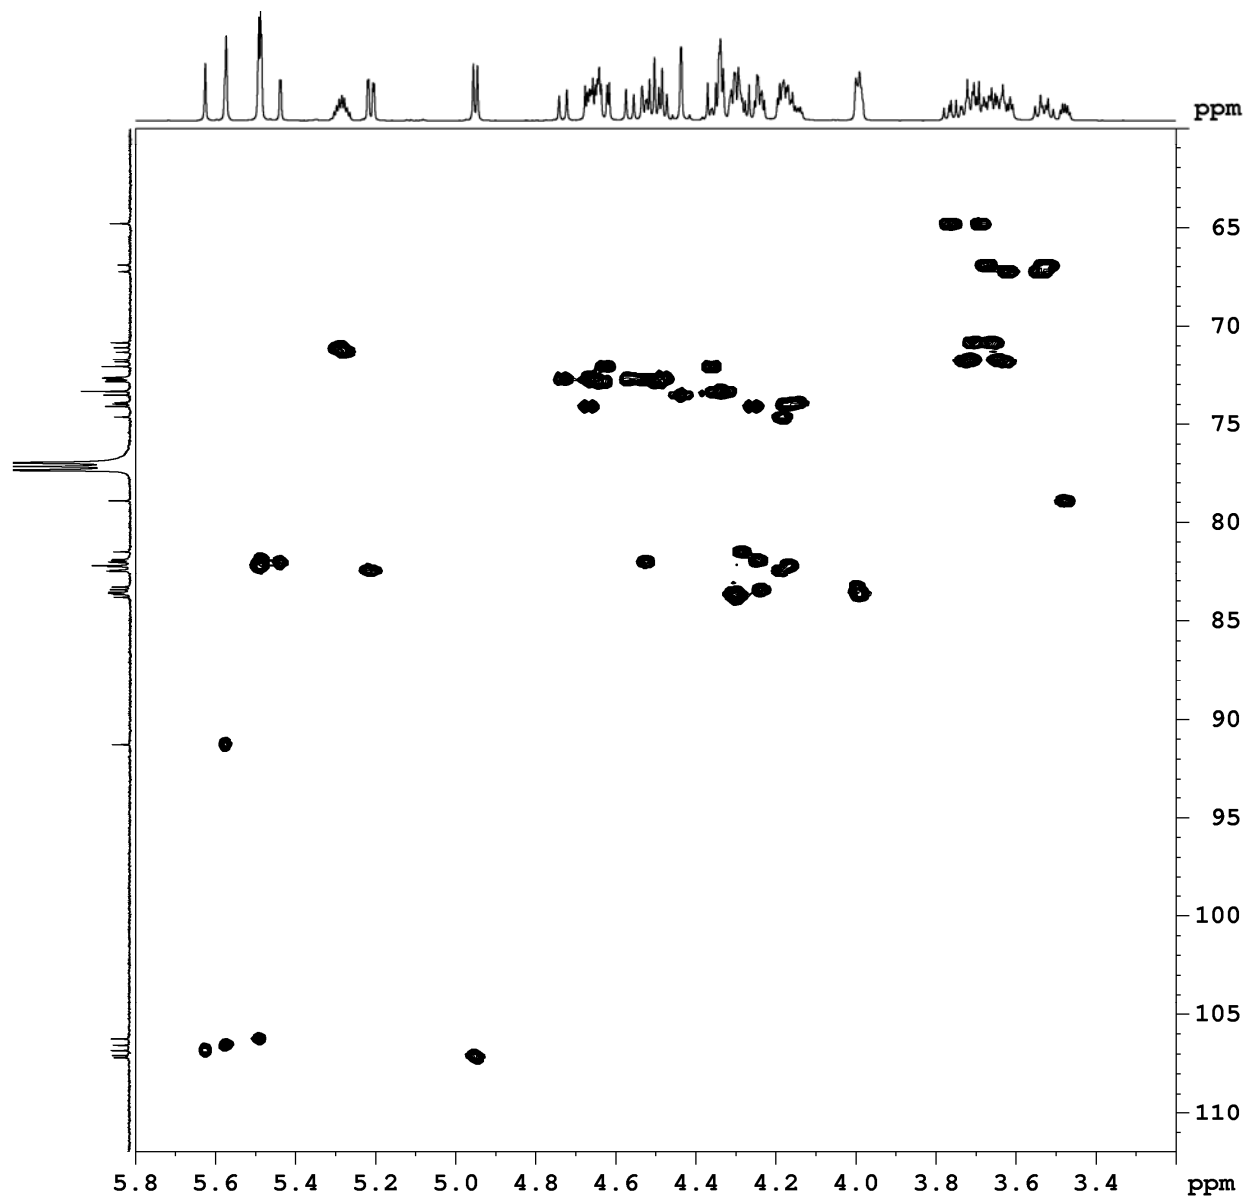

```

NAME          WY-0601
EXPNO         4
PROCNO        1
Date_         20160415
Time          16.17
INSTRUM       spect
PROBHD        5 mm CPTCI 1H-
PULPROG       hsqcetgp
TD            2048
SOLVENT       CDCl3
NS            8
DS            16
SWH           5980.861 Hz
FIDRES        2.920342 Hz
AQ            0.1712628 sec
RG            203
DW            83.600 usec
DE            10.00 usec
TE            300.4 K
CNST2         145.0000000
D0            0.00000300 sec
D1            1.50000000 sec
D4            0.00172414 sec
D11           0.03000000 sec
D13           0.00000400 sec
D16           0.00020000 sec
INO           0.00002000 sec
ZGPTNS

```

```

===== CHANNEL f1 =====
NUC1          1H
P1            12.00 usec
P2            24.00 usec
P28           0.00 usec
ND0           2
TD            512
SF01          150.9141 MHz
FIDRES        48.822838 Hz
SW            165.639 ppm
FnMODE        Echo-Antiecho
SI            1024
SF            600.1300224 MHz
WDW           QSINE
SSB           2
LB            0.00 Hz
GB            0
PC            1.40
SI            1024
MC2           echo-antiecho
SF            150.9027821 MHz
WDW           QSINE
SSB           2
LB            0.00 Hz
GB            0

```

Supplementary Figure 58. HSQC NMR spectrum of compound 9

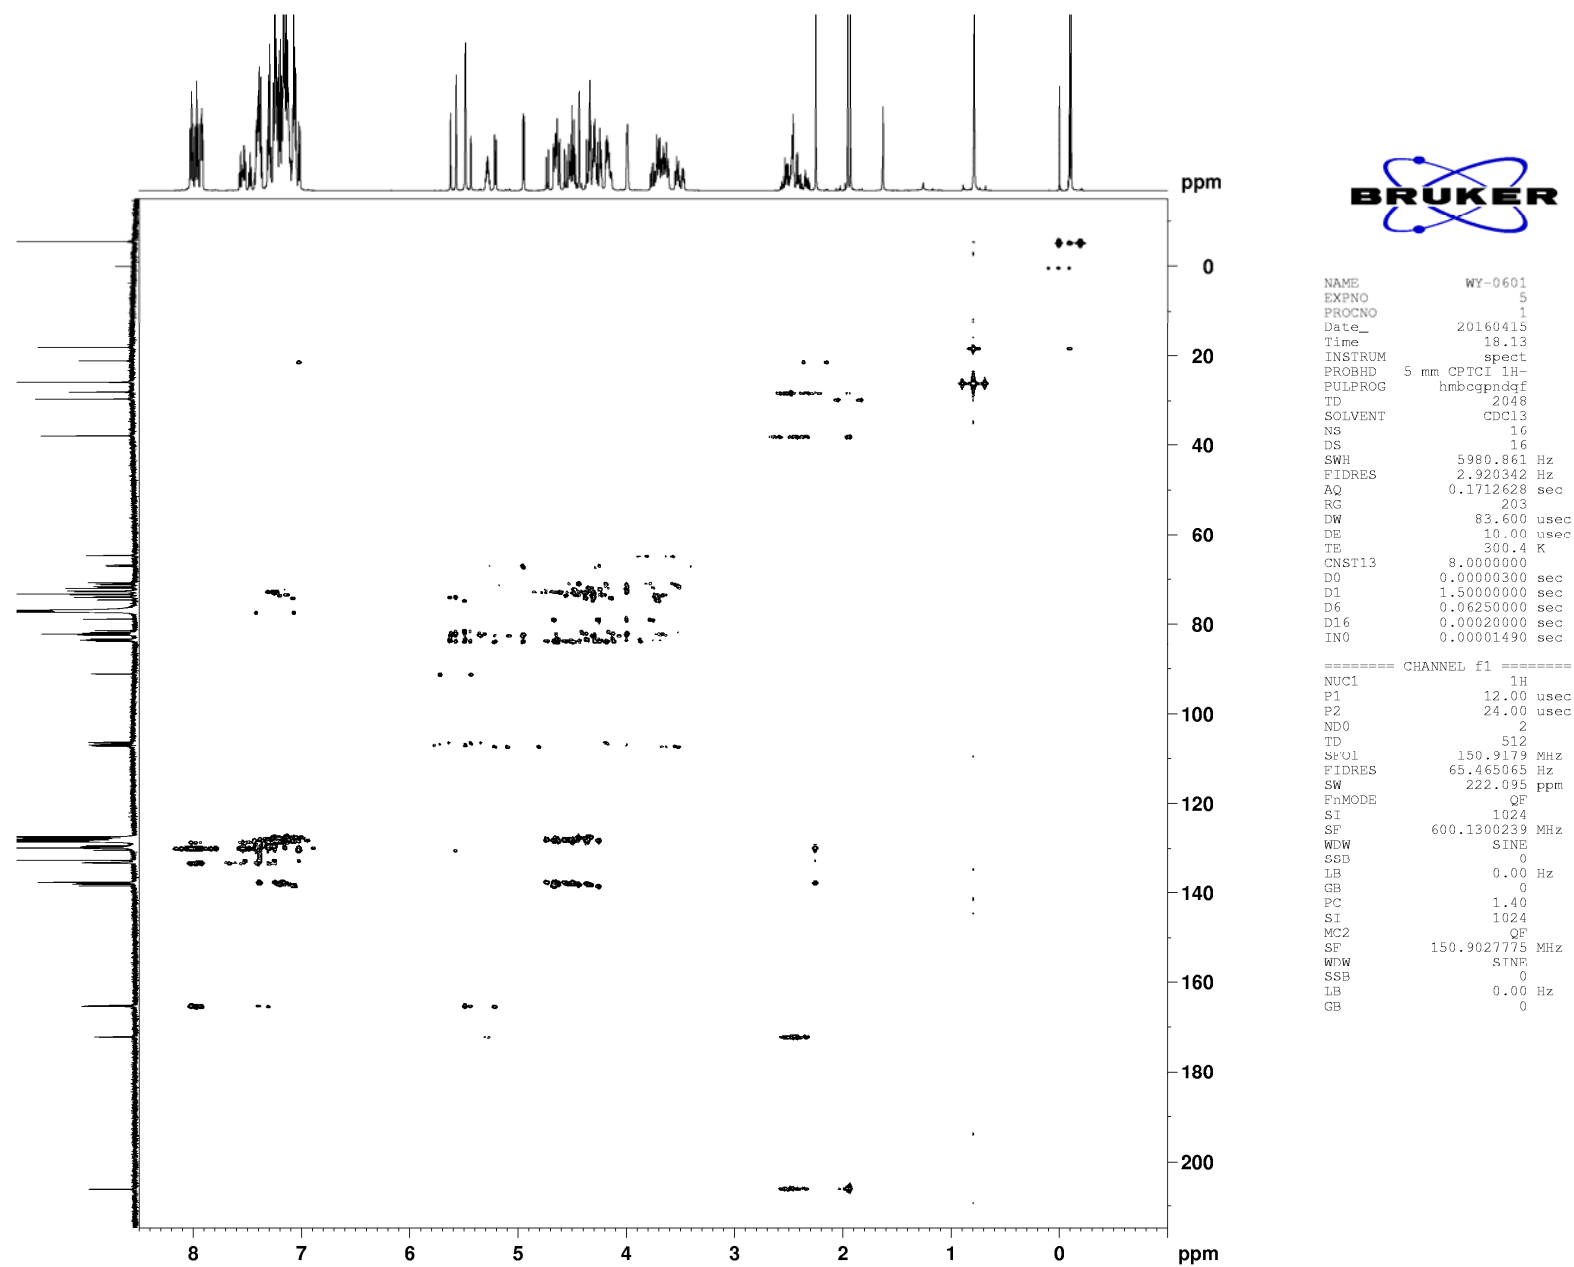

Supplementary Figure 59. HMBC NMR spectrum of compound 9

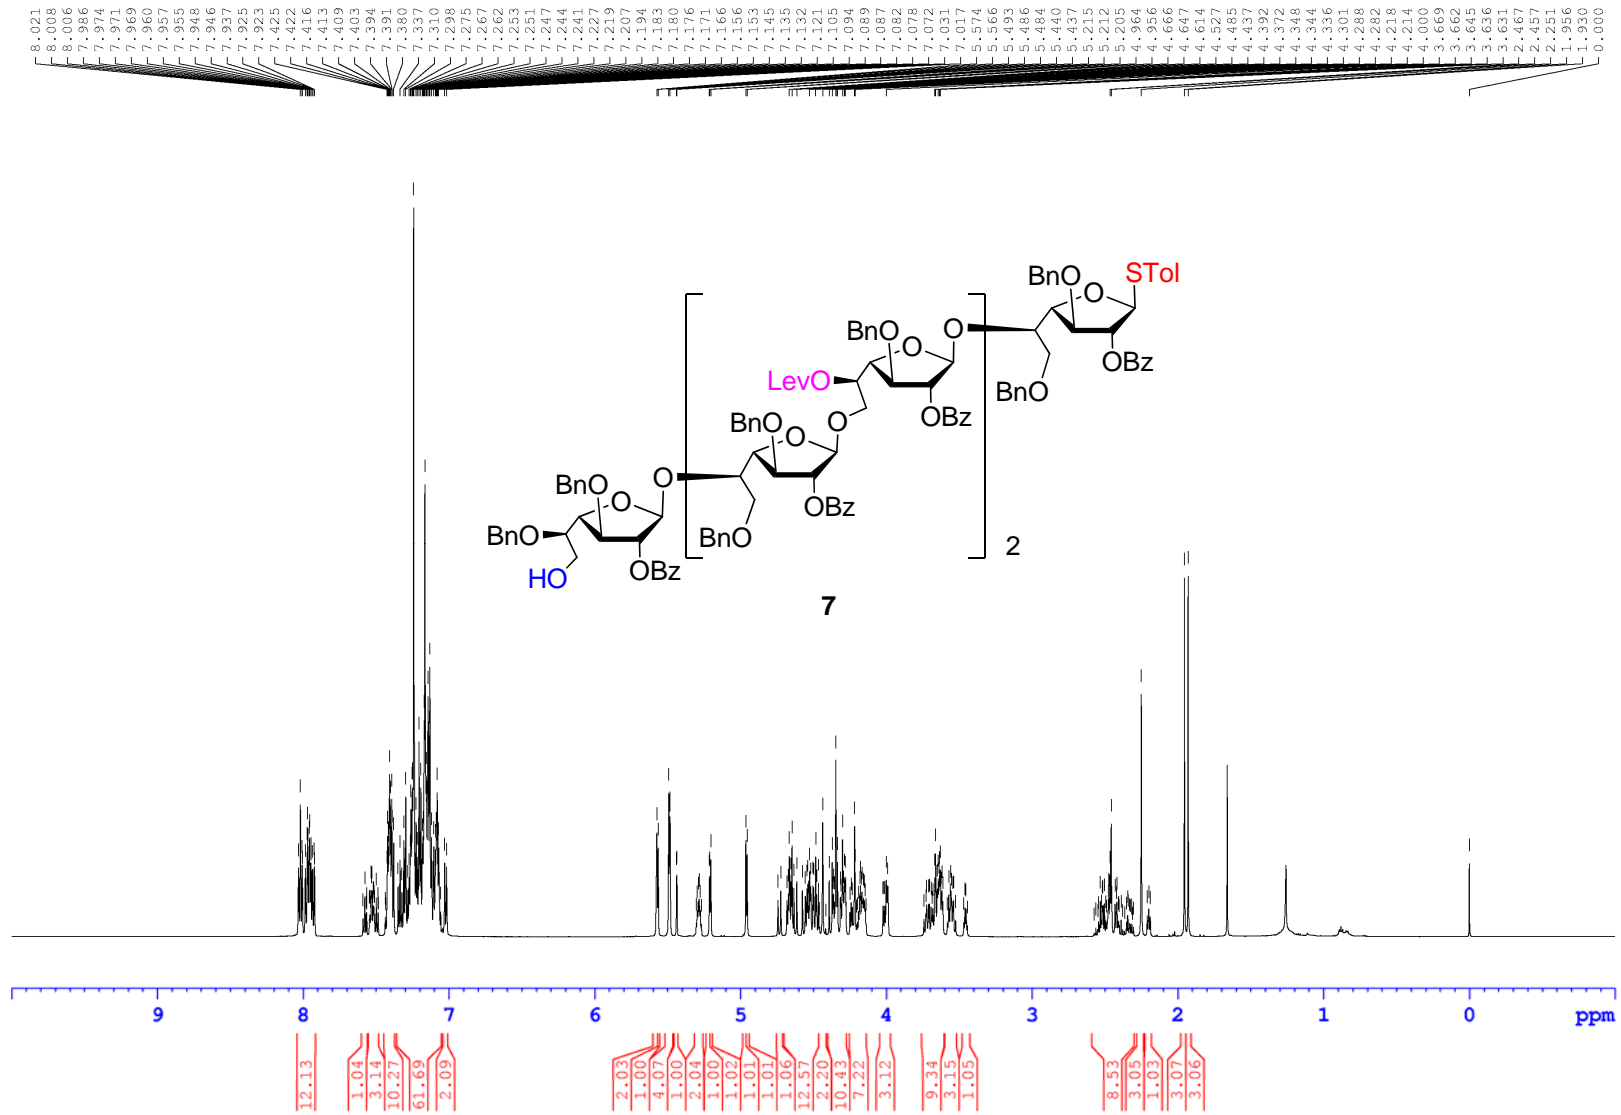

Supplementary Figure 60. <sup>1</sup>H NMR spectrum of compound 7

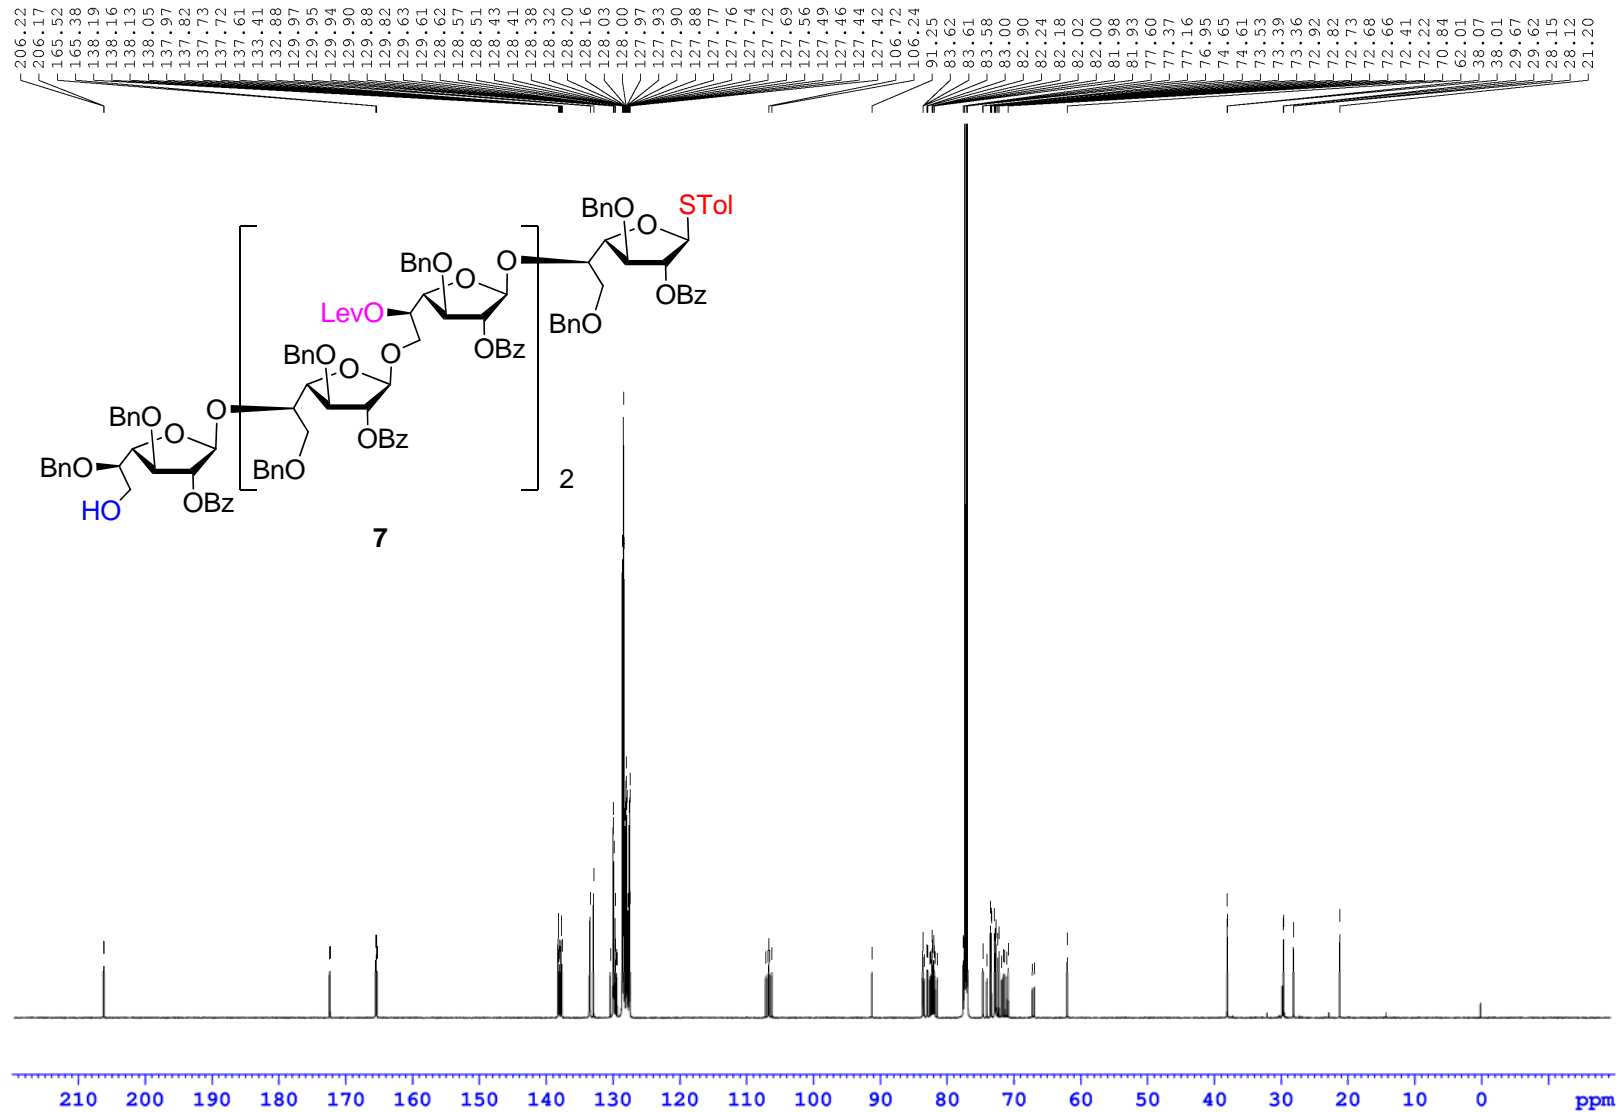

Supplementary Figure 61. <sup>13</sup>C NMR spectrum of compound 7

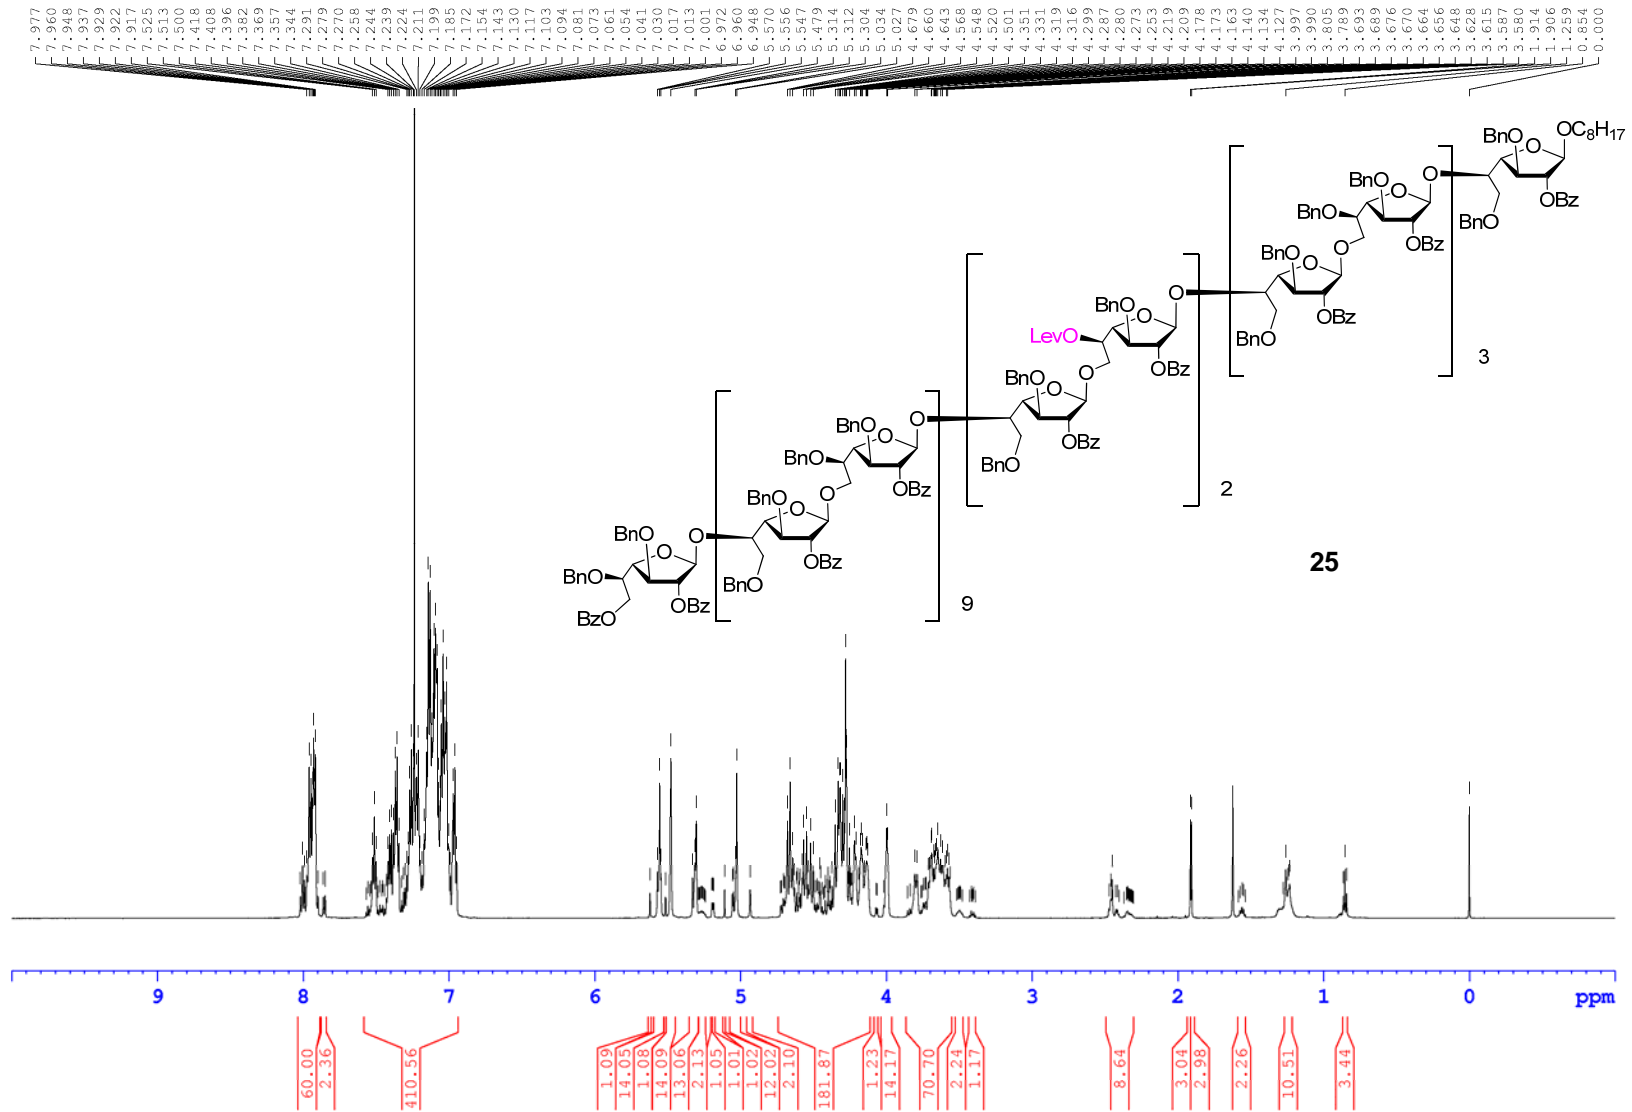

Supplementary Figure 62. <sup>1</sup>H NMR spectrum of compound 25

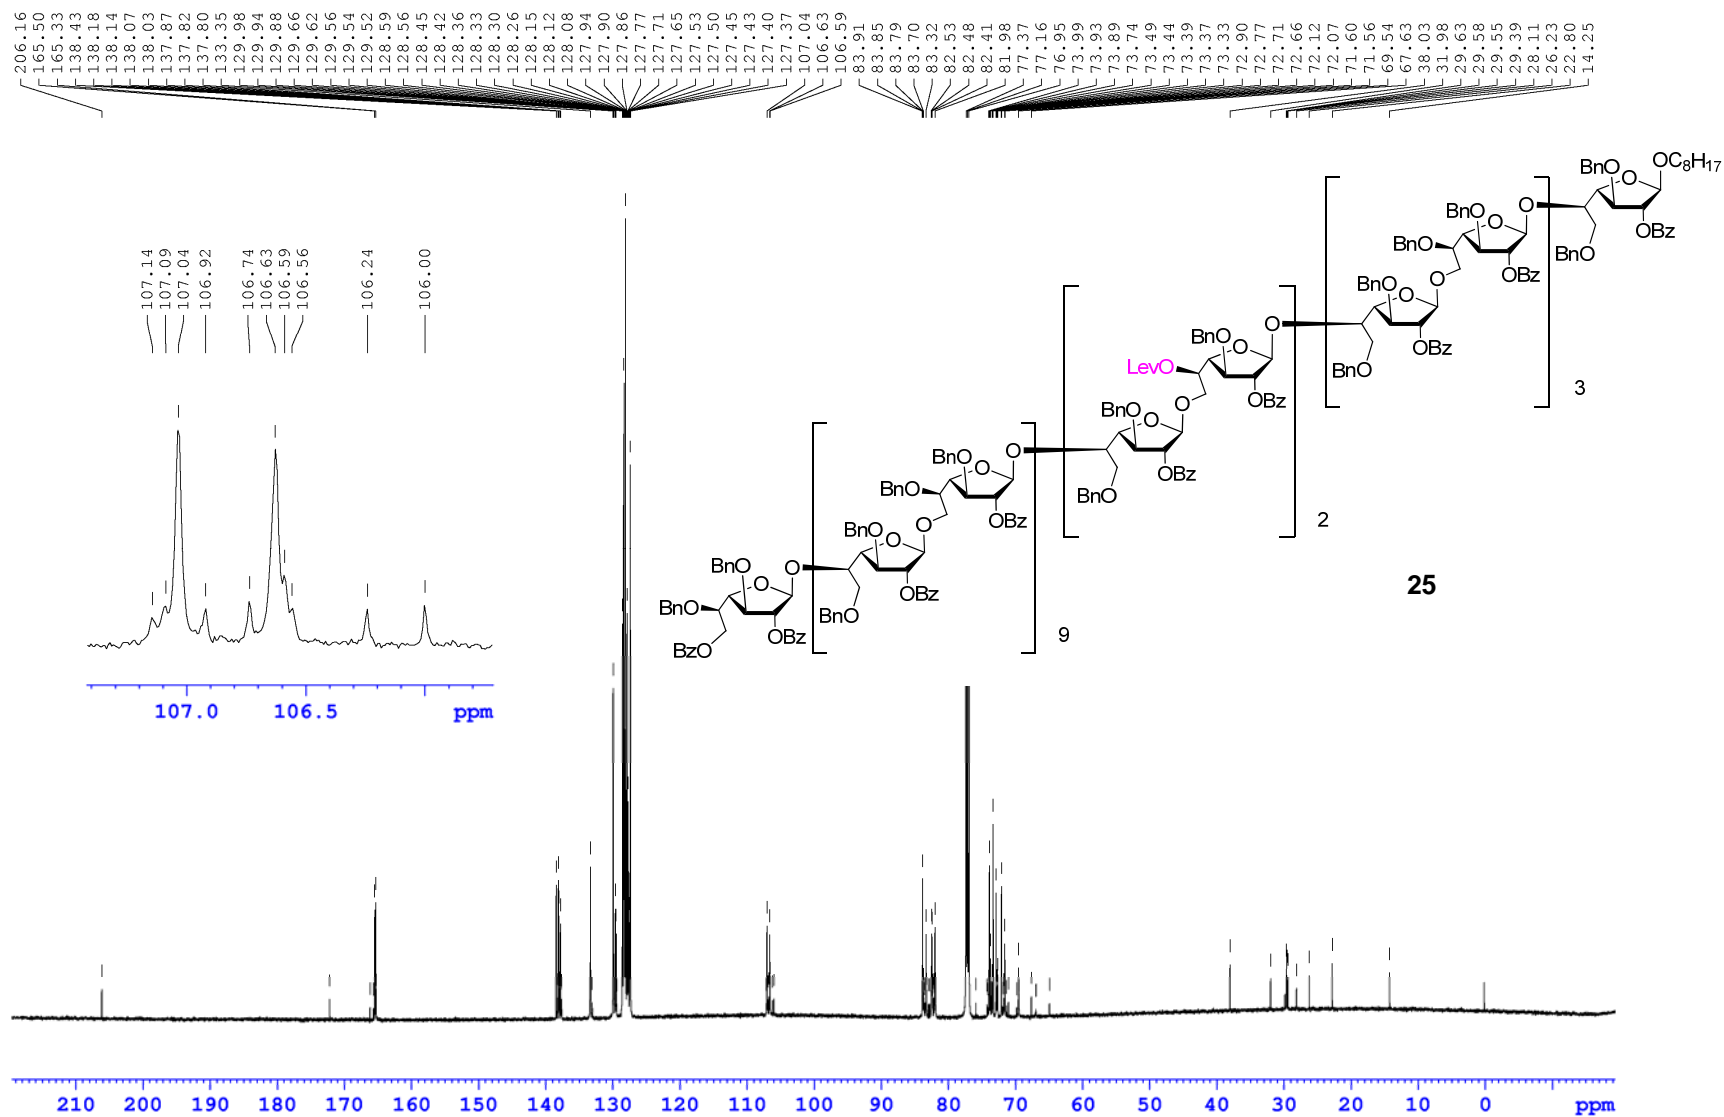

Supplementary Figure 63. <sup>13</sup>C NMR spectrum of compound 25

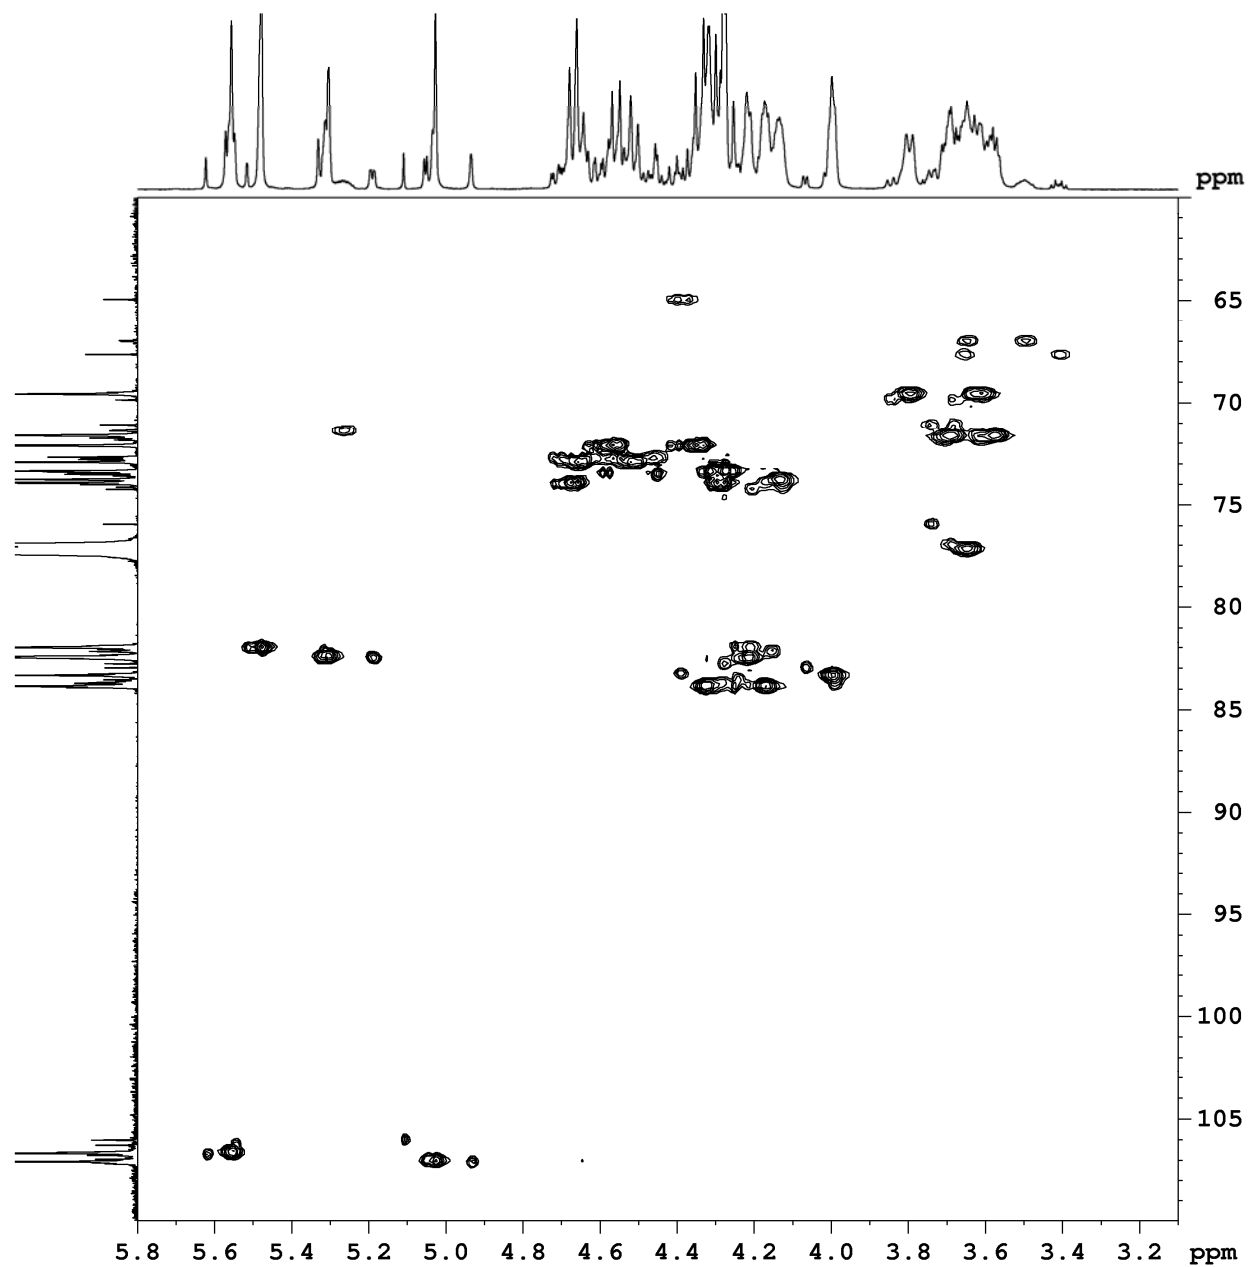

```

NAME          WY-0603
EXPNO         4
PROCNO        1
Date_         20160408
Time          18.02
INSTRUM       spect
PROBHD        5 mm CPTCI 1H-
PULPROG       hsqcetgp
TD            2048
SOLVENT       CDC13
NS            16
DS            16
SWH           5543.237 Hz
FIDRES        2.706659 Hz
AQ            0.1847796 sec
RG            203
DW            90.200 usec
DE            10.00 usec
TE            300.4 K
CNST2         145.0000000
D0            0.00000300 sec
D1            1.50000000 sec
D4            0.00172414 sec
D11           0.03000000 sec
D13           0.00000400 sec
D16           0.00020000 sec
INO           0.00002000 sec
ZGPTNS

```

```

===== CHANNEL f1 =====
NUC1          1H
P1            12.00 usec
P2            24.00 usec
P28           0.00 usec
ND0           2
TD            512
SF01          150.9141 MHz
FIDRES        48.822838 Hz
SW            165.639 ppm
FnMODE        Echo-Antiecho
SI            1024
SF            600.1300263 MHz
WDW           QSINE
SSB           2
LB            0.00 Hz
GB            0
PC            1.40
SI            1024
MC2           echo-antiecho
SF            150.9027848 MHz
WDW           QSINE
SSB           2
LB            0.00 Hz
GB            0

```

Supplementary Figure 64. HSQC NMR spectrum of compound 25



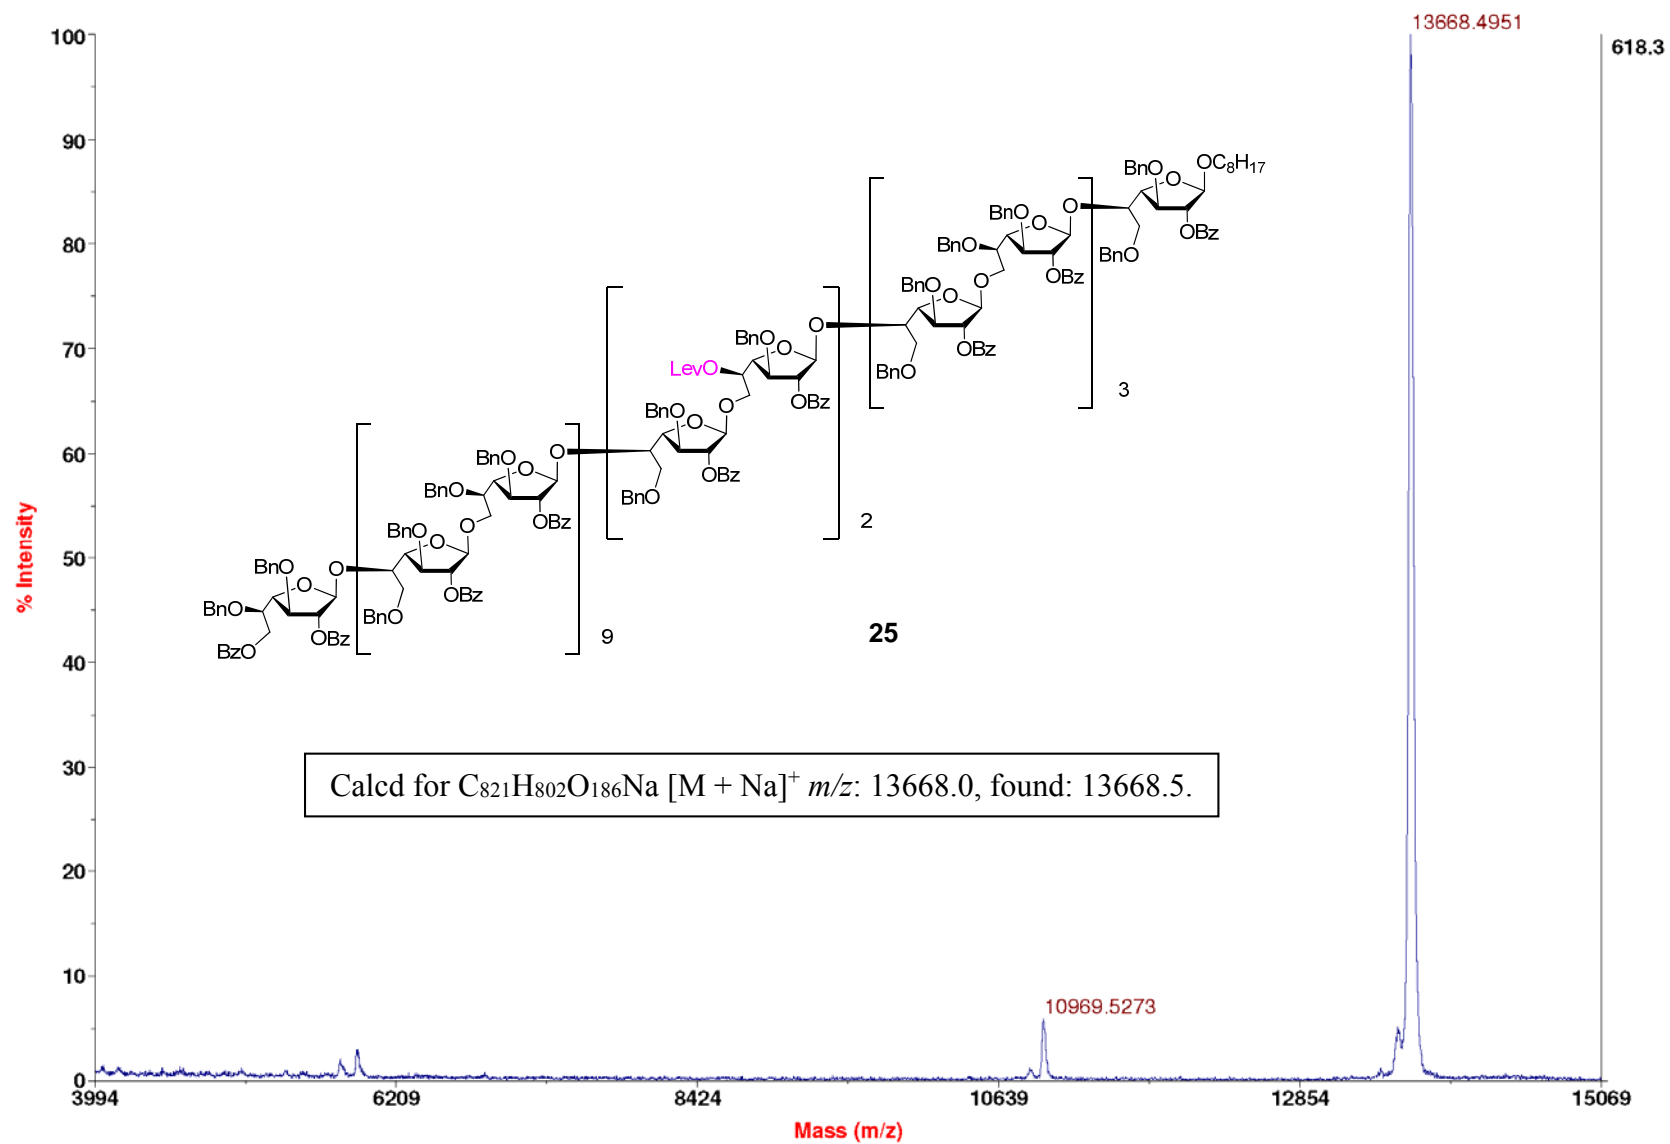

Supplementary Figure 65. MALDI-TOF MS spectrum of compound 25

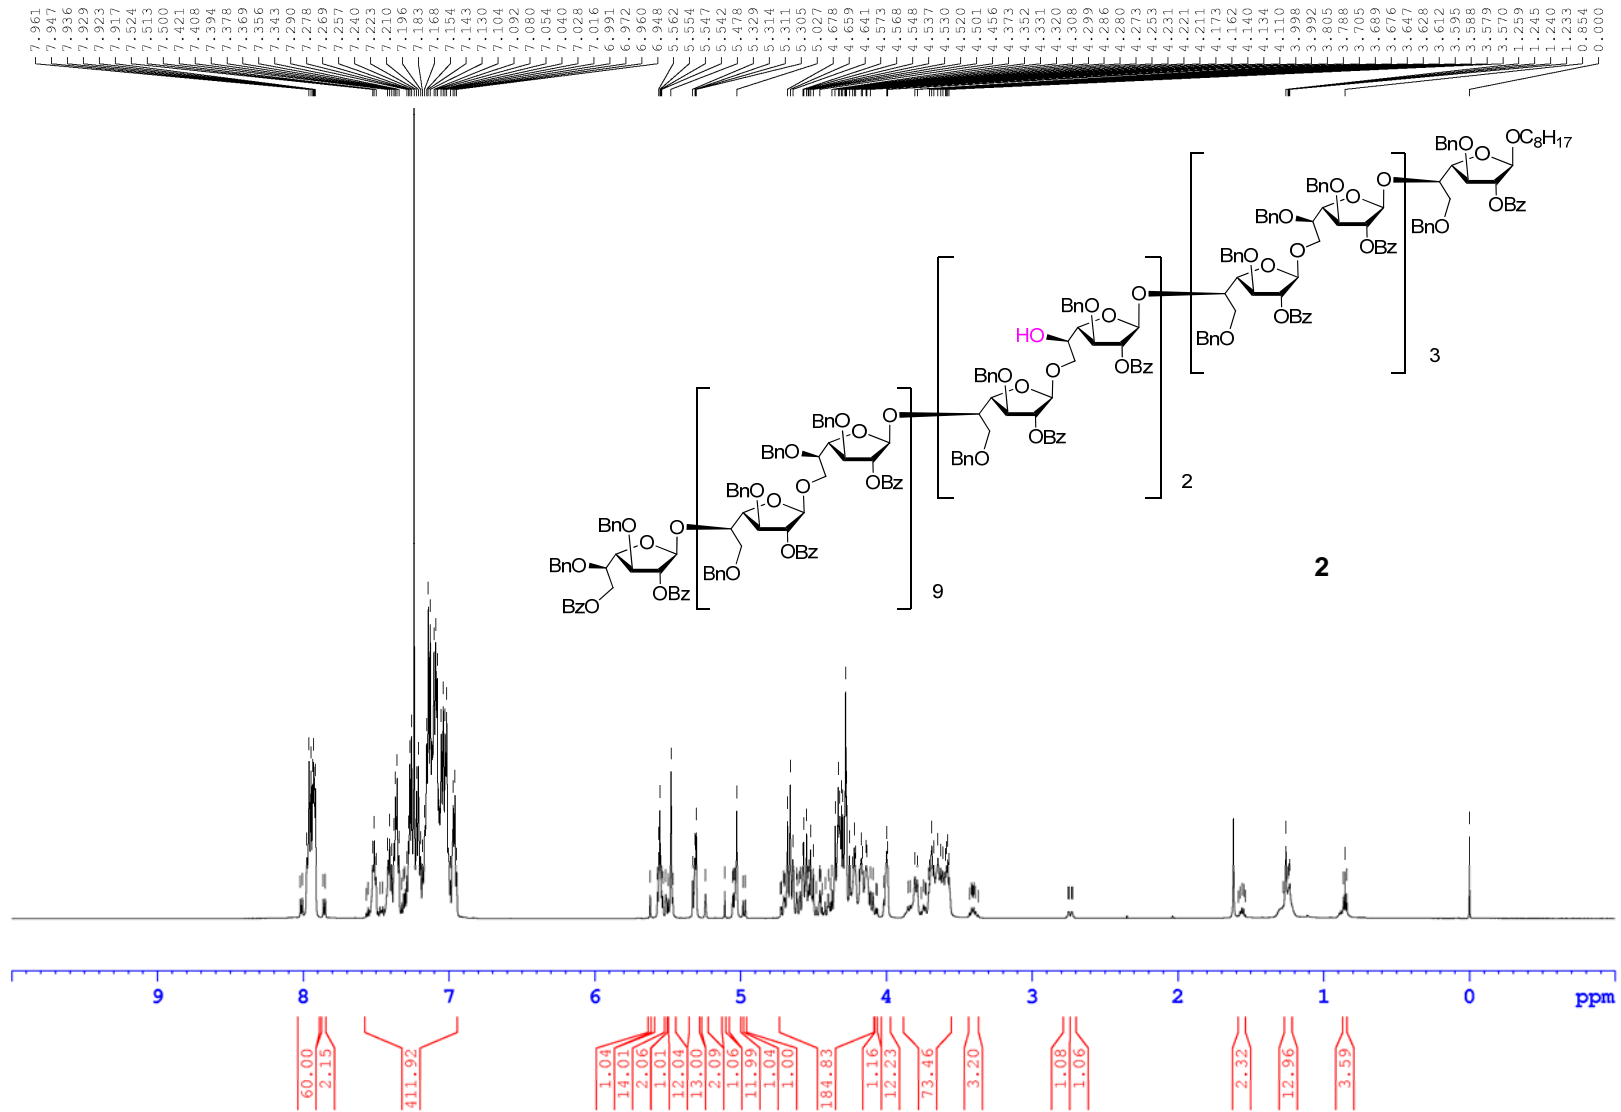

Supplementary Figure 66. <sup>1</sup>H NMR spectrum of compound 2

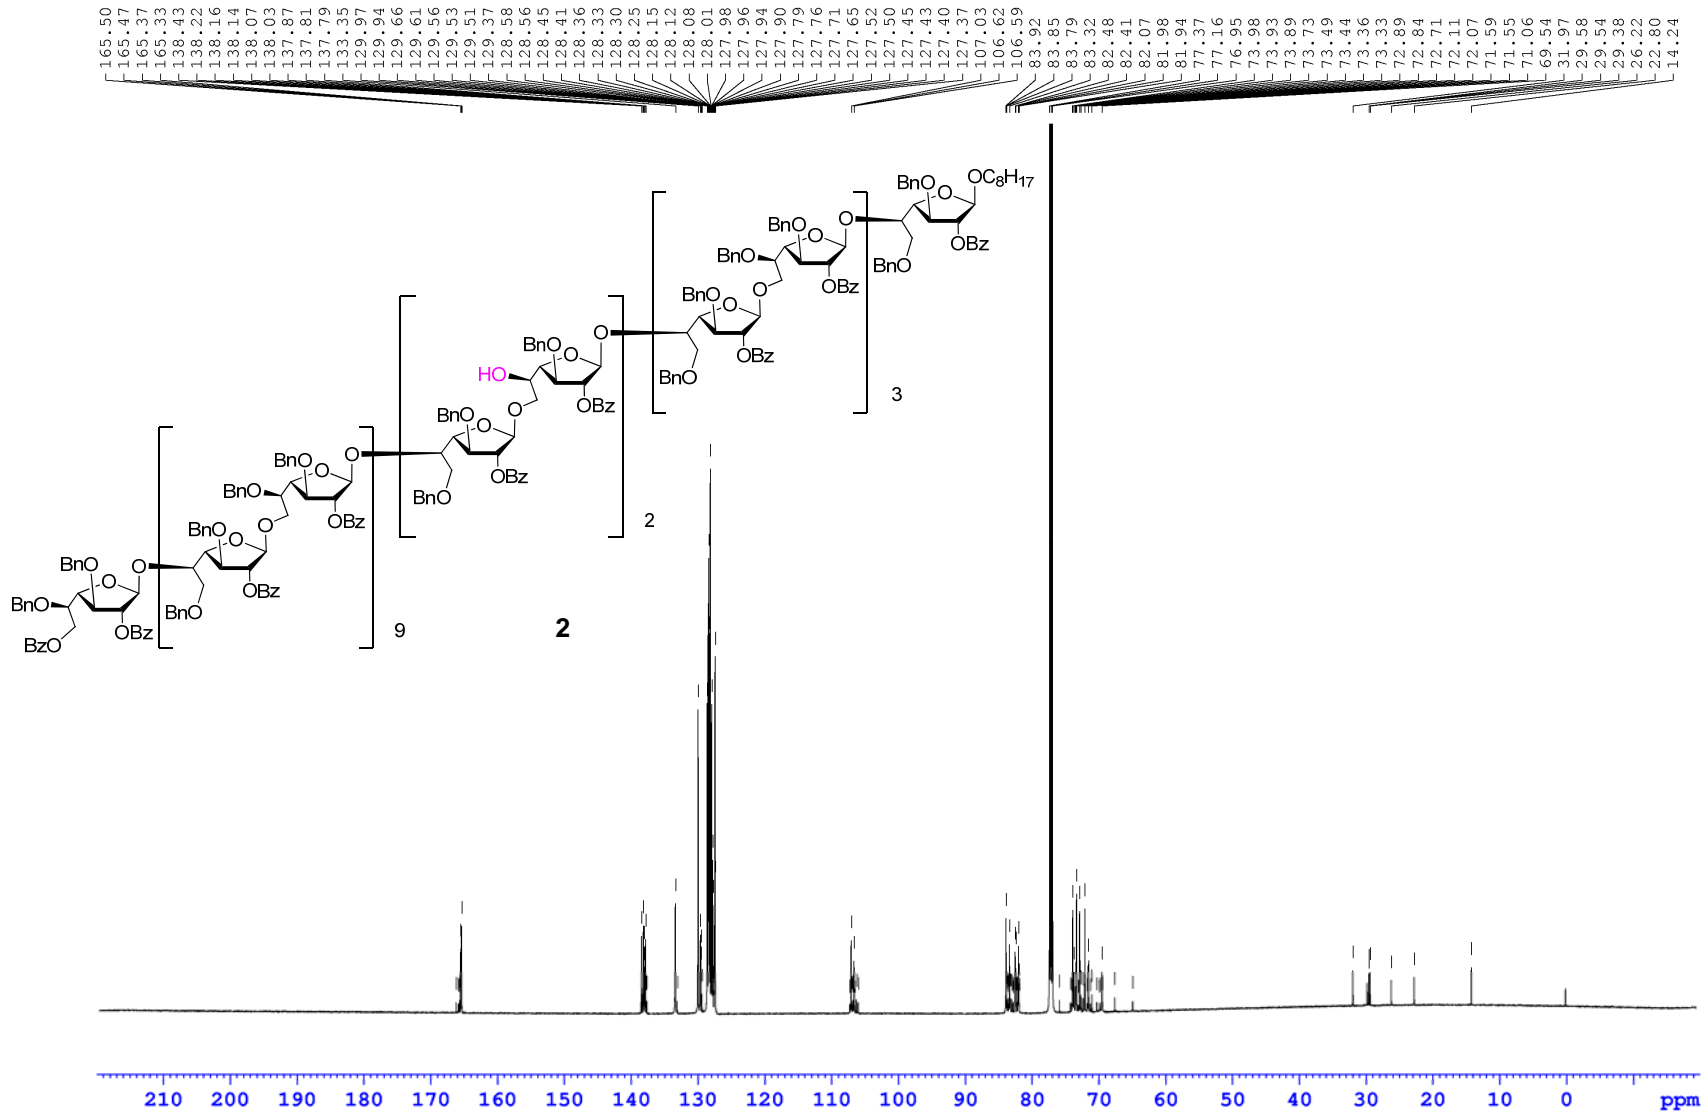

Supplementary Figure 67. <sup>13</sup>C NMR spectrum of compound 2

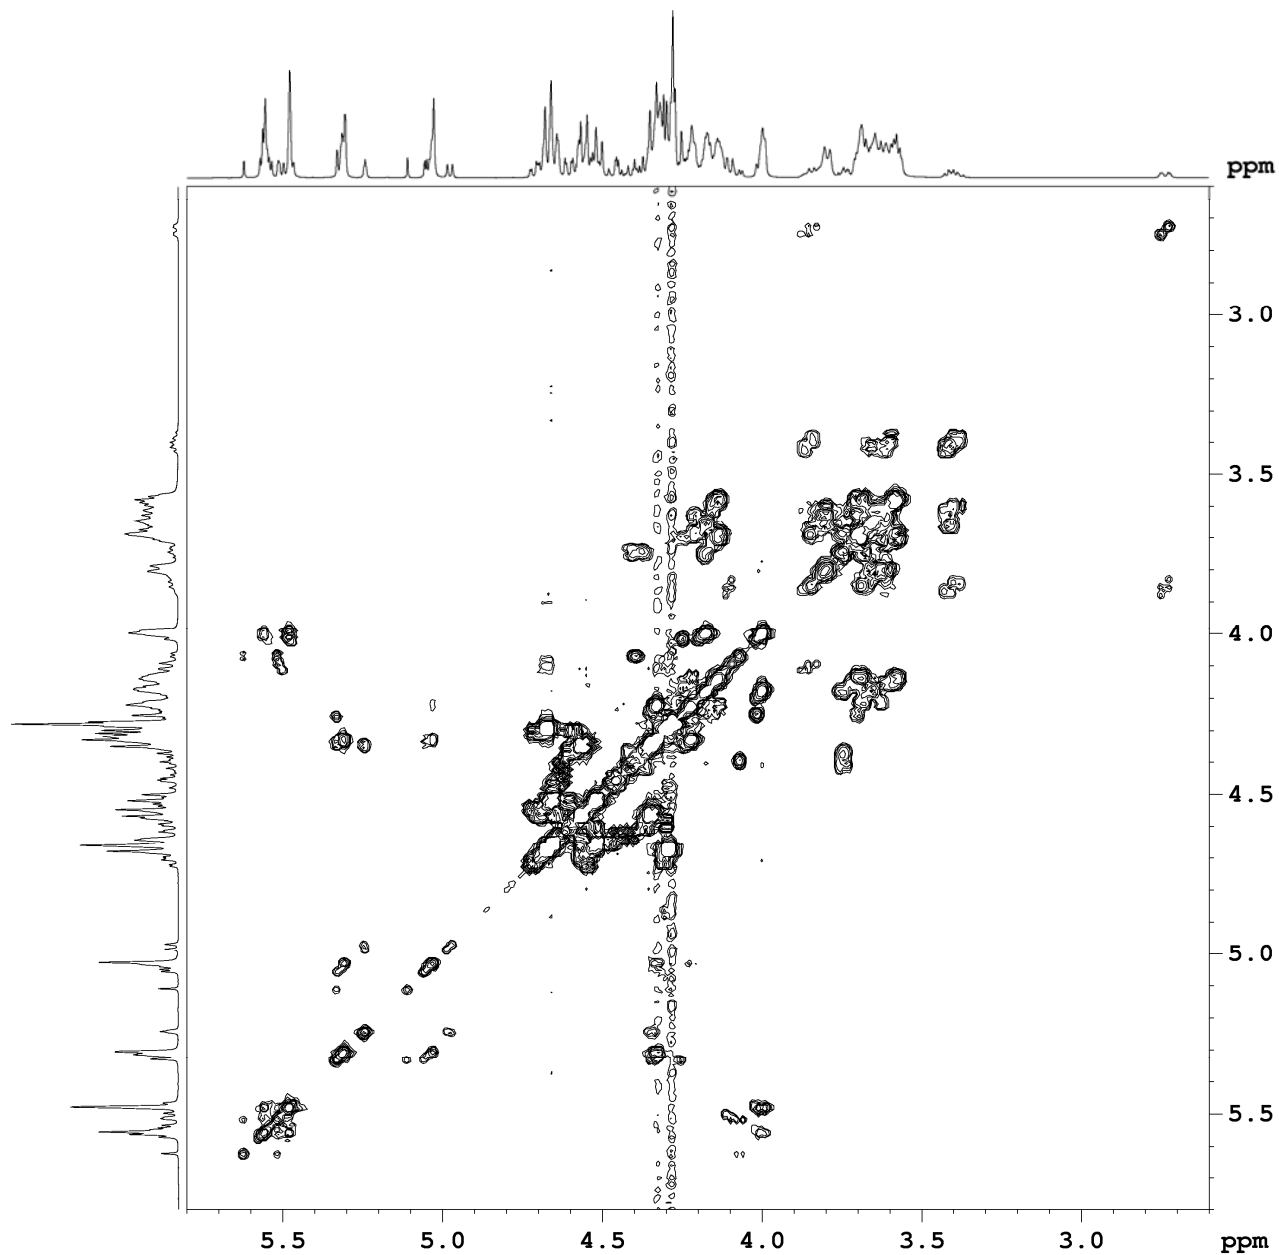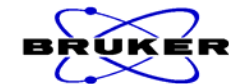

```

NAME          WY-0604
EXPNO         3
PROCNO        1
Date_         20160406
Time          23.15
INSTRUM       spect
PROBHD        5 mm CPTCI 1H-
PULPROG       cosygpmfqf
TD            2048
SOLVENT       CDC13
NS            4
DS            8
SWH           6038.647 Hz
FIDRES        2.948558 Hz
AQ            0.1696244 sec
RG            203
DW            82.800 usec
DE            10.00 usec
TE            300.4 K
D0            0.00000300 sec
D1            2.00000000 sec
D13           0.00000400 sec
D16           0.00020000 sec
IN0           0.00016560 sec

```

```

===== CHANNEL f1 =====
NUC1          1H
P1            12.00 usec
ND0           1
TD            1024
SFO1          600.1324 MHz
FIDRES        5.897133 Hz
SW            10.062 ppm
FnMODE        QF
SI            1024
SF            600.1300253 MHz
WDW           SINE
SSB           0
LB            0.00 Hz
GB            0
PC            1.40
SI            1024
MC2           QF
SF            600.1300253 MHz
WDW           SINE
SSB           0
LB            0.00 Hz
GB            0

```

Supplementary Figure 68. COSY NMR spectrum of compound 2

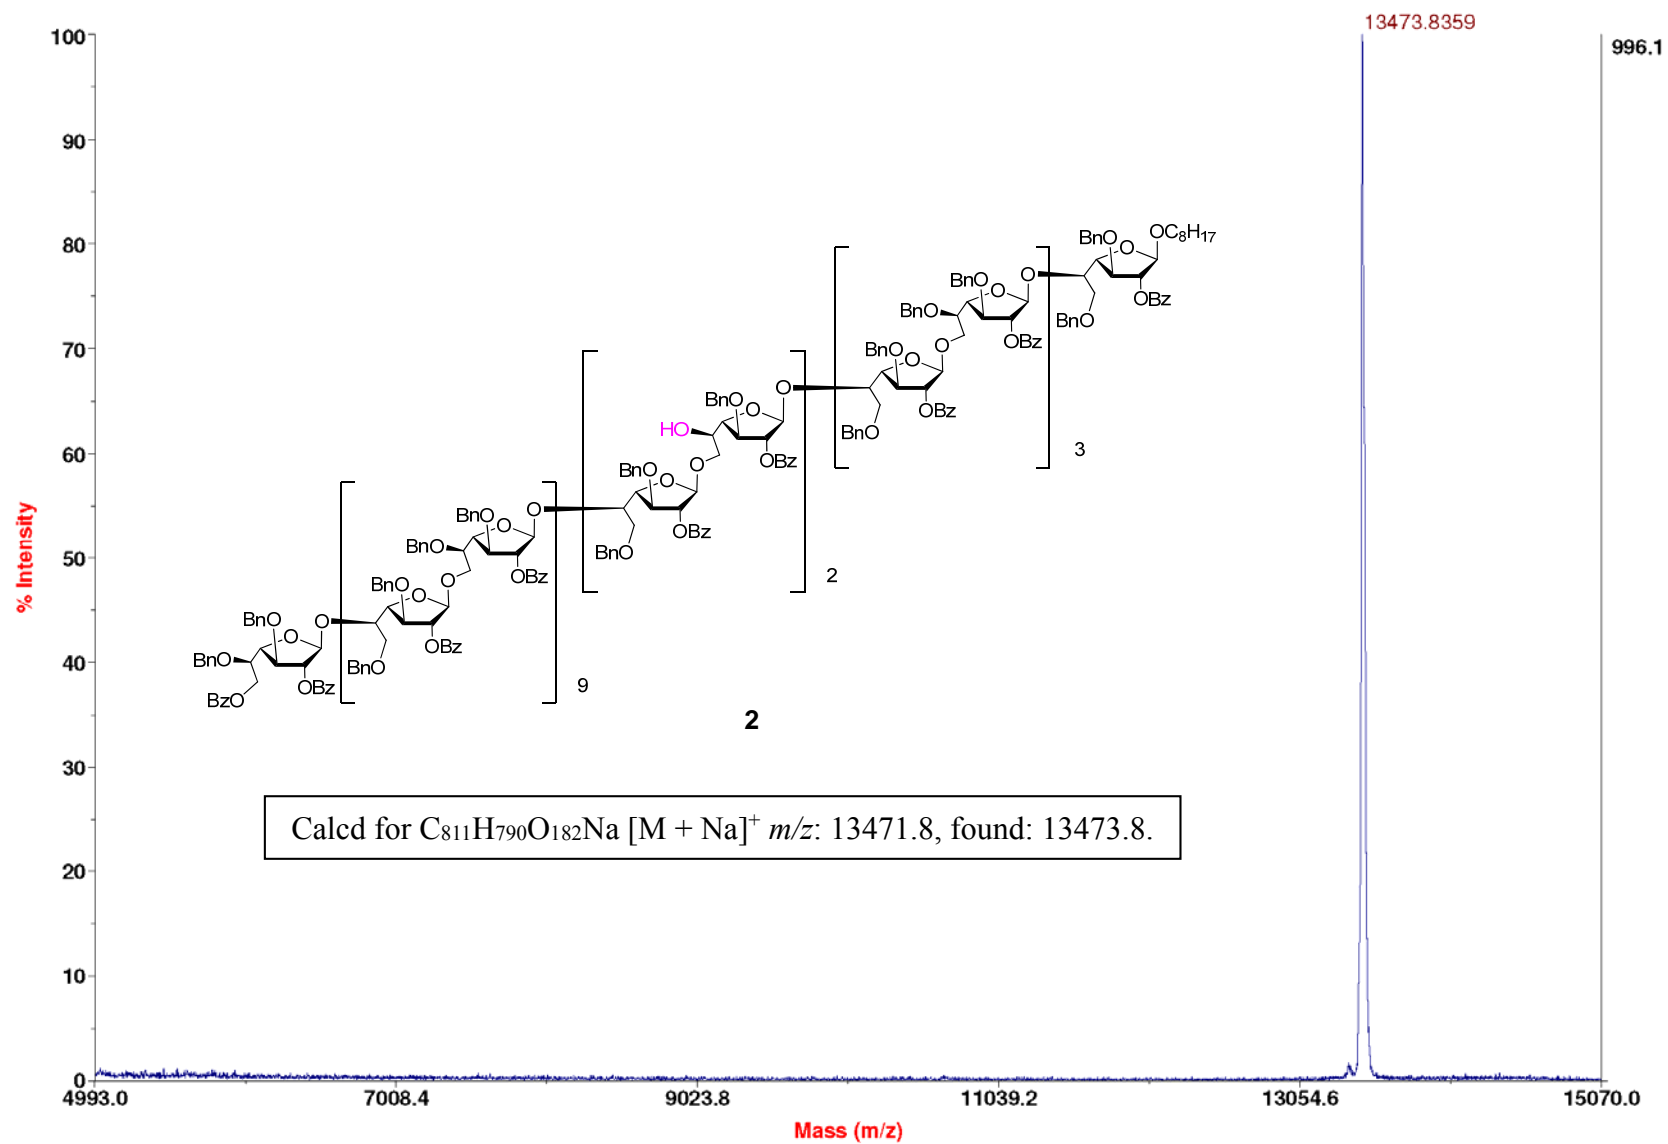

C:\AB SCIEX\TOFTOF Data\ExportT2D\zhong\20160225-2000\J13\_LINEAR.t2d

Printed: 16:35, April 15, 2016

Supplementary Figure 69. MALDI-TOF MS spectrum of compound 2

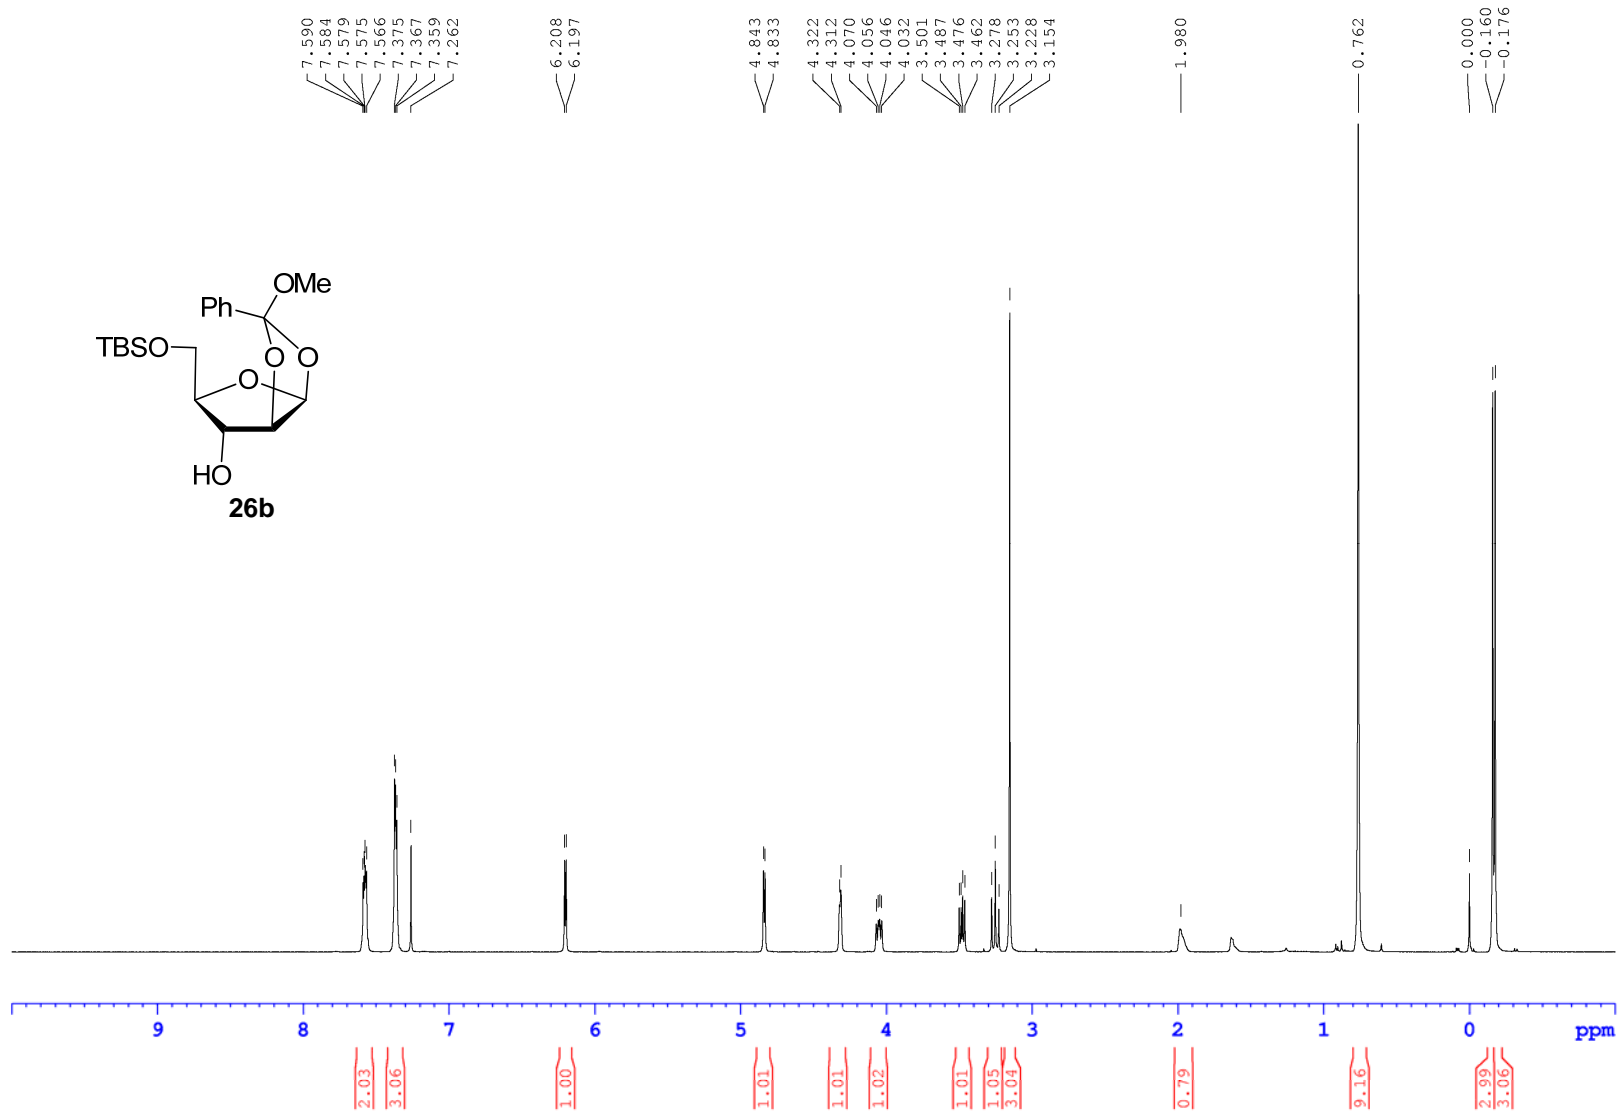

Supplementary Figure 70. <sup>1</sup>H NMR spectrum of compound 26b

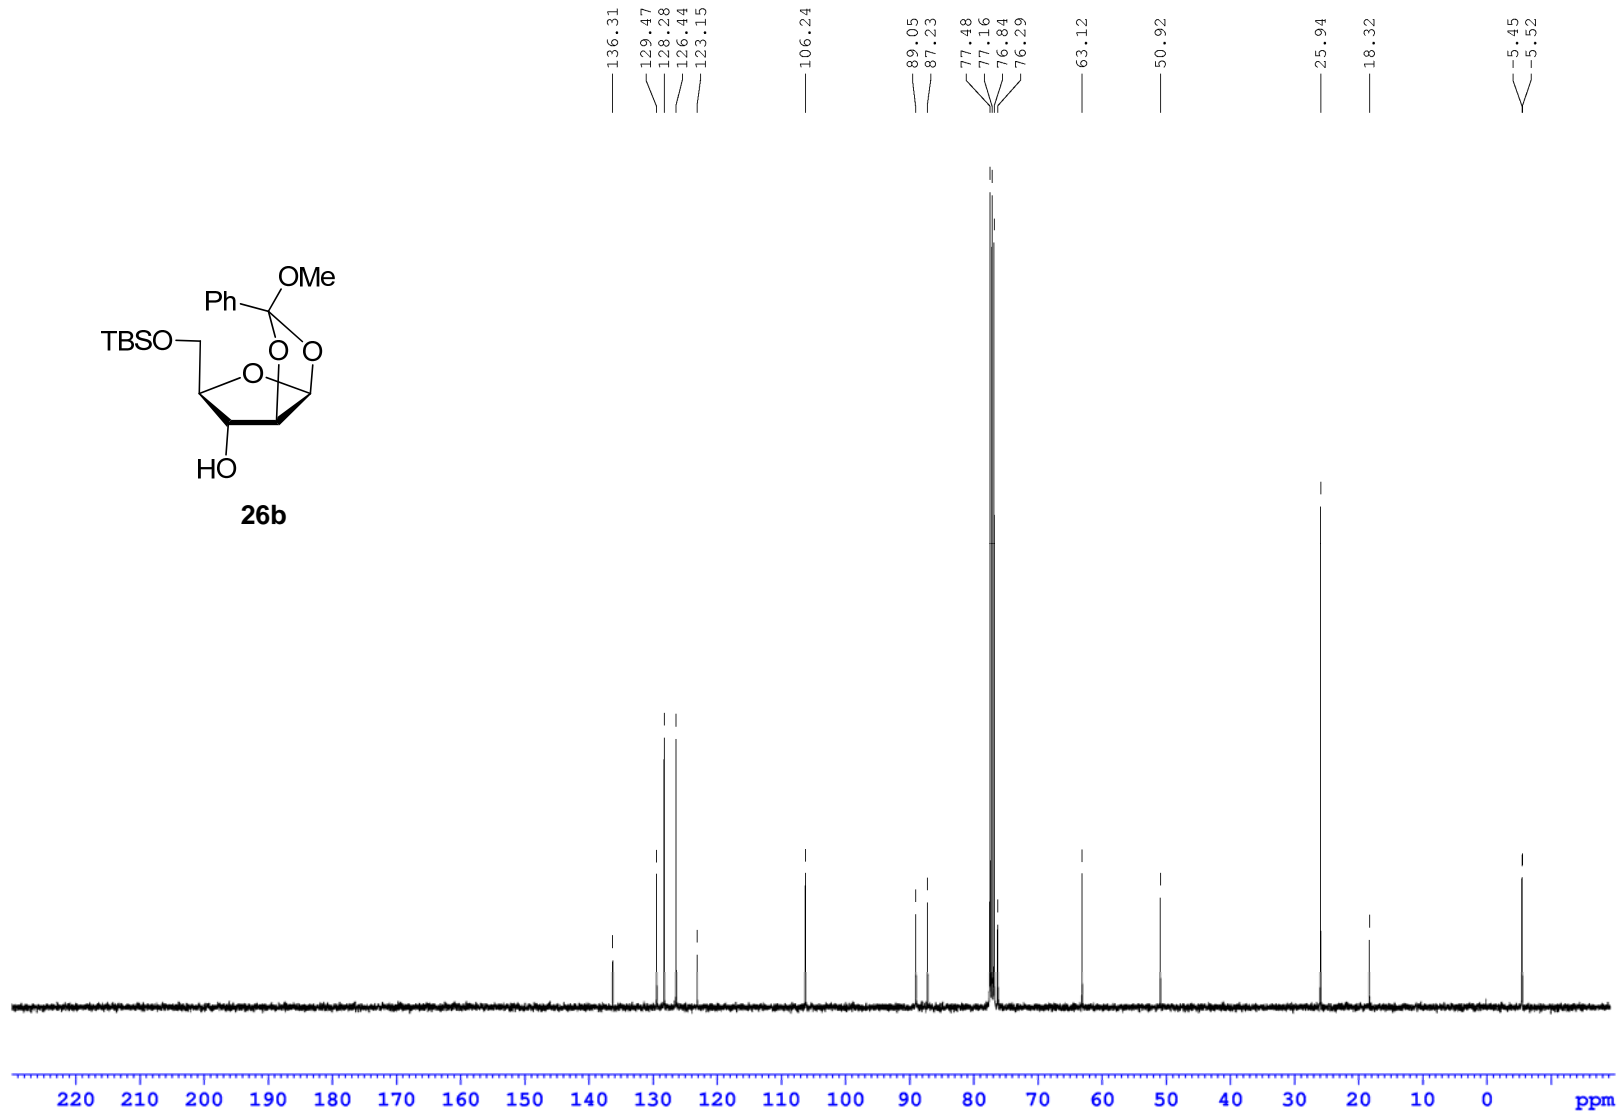

Supplementary Figure 71. <sup>13</sup>C NMR spectrum of compound 26b

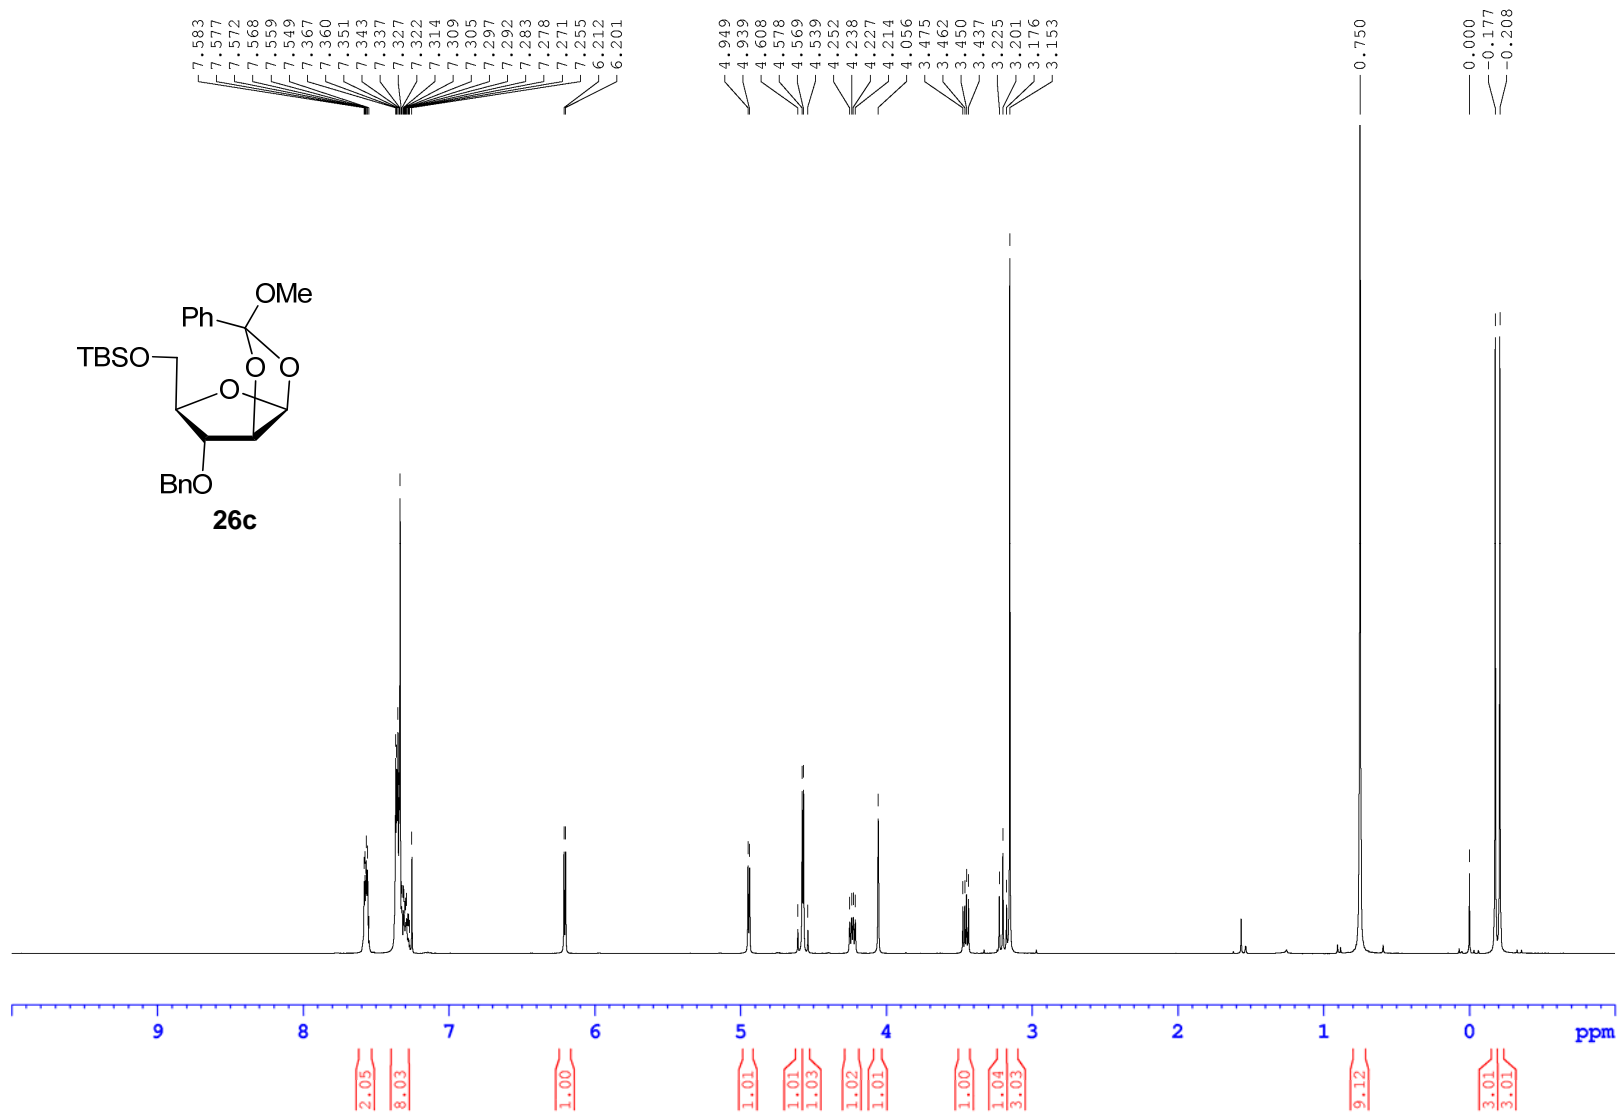

Supplementary Figure 72. <sup>1</sup>H NMR spectrum of compound 26c



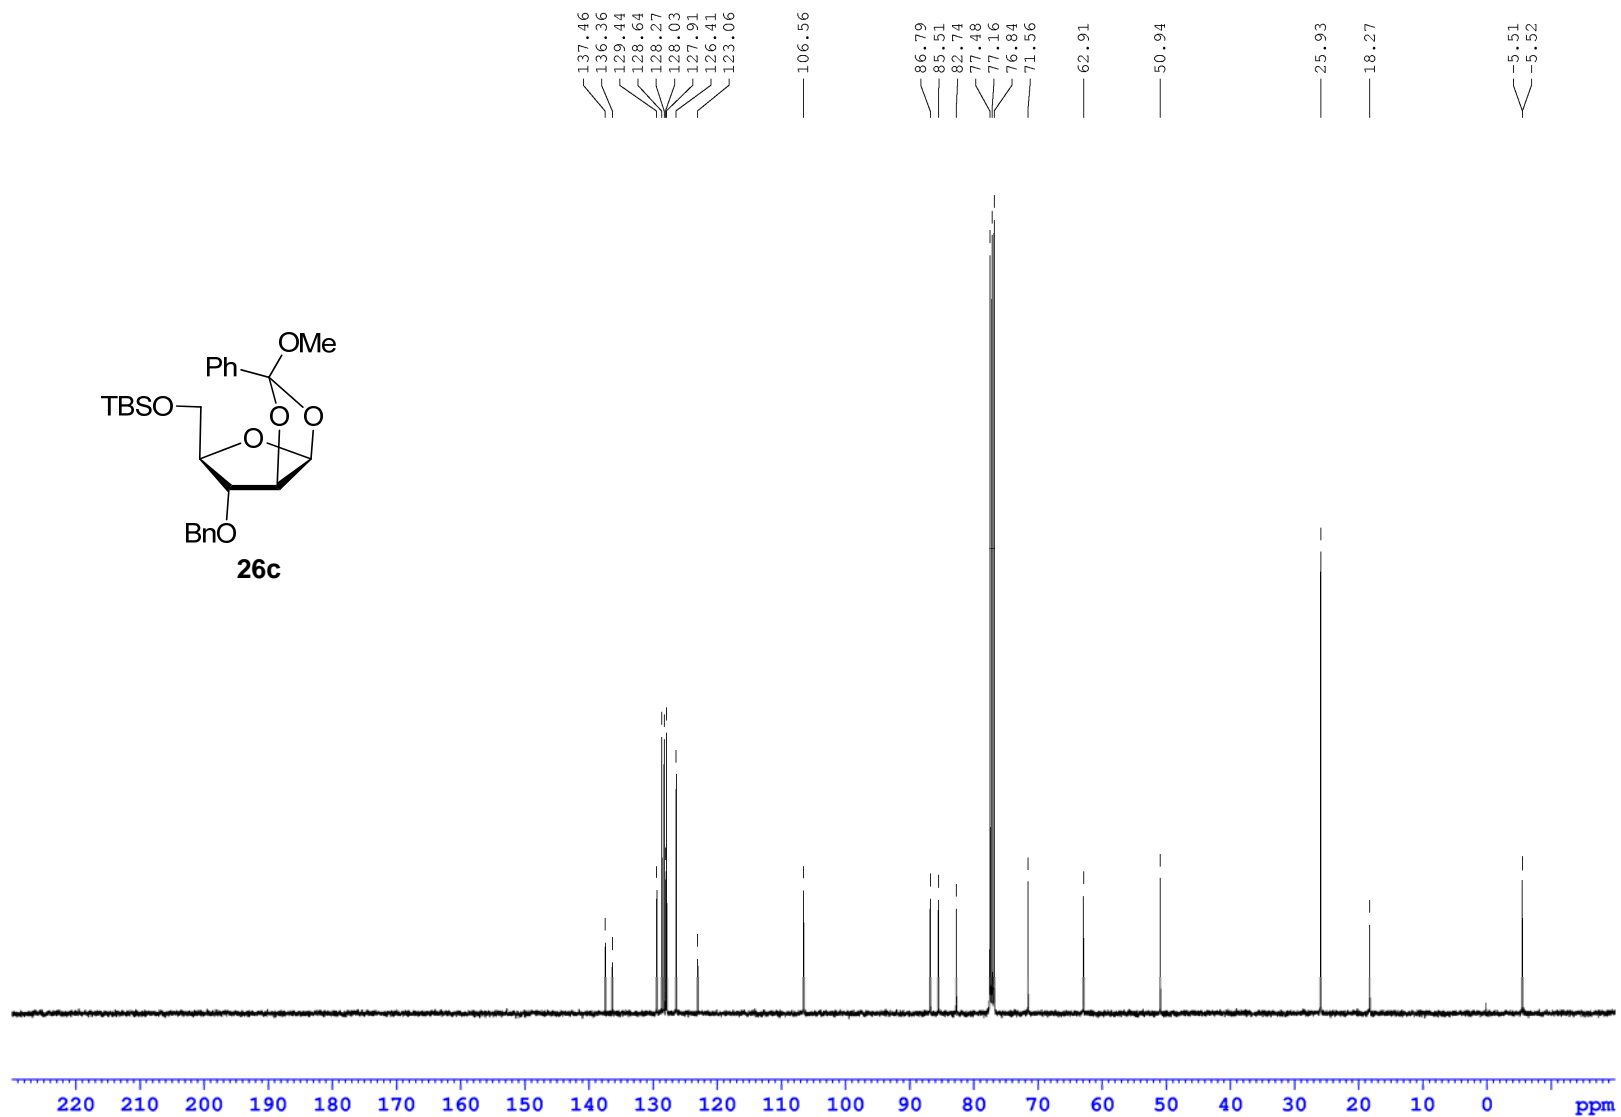

Supplementary Figure 73. <sup>13</sup>C NMR spectrum of compound 26c

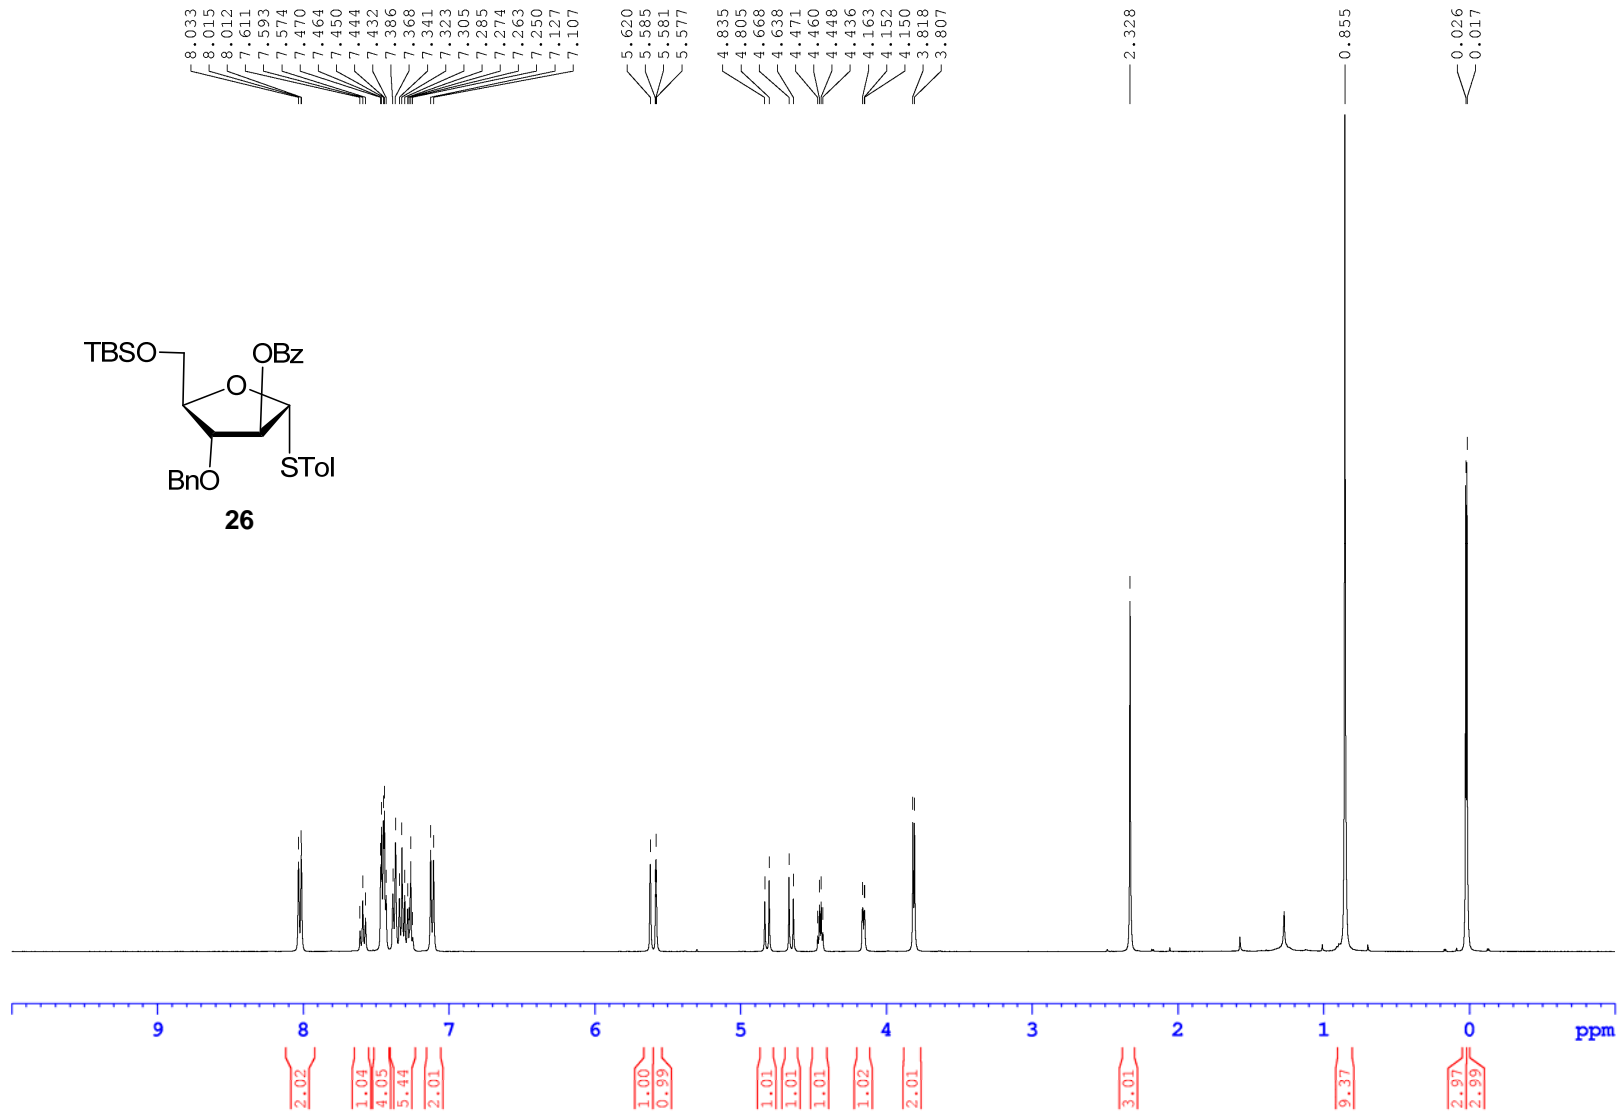

Supplementary Figure 74. <sup>1</sup>H NMR spectrum of compound 26

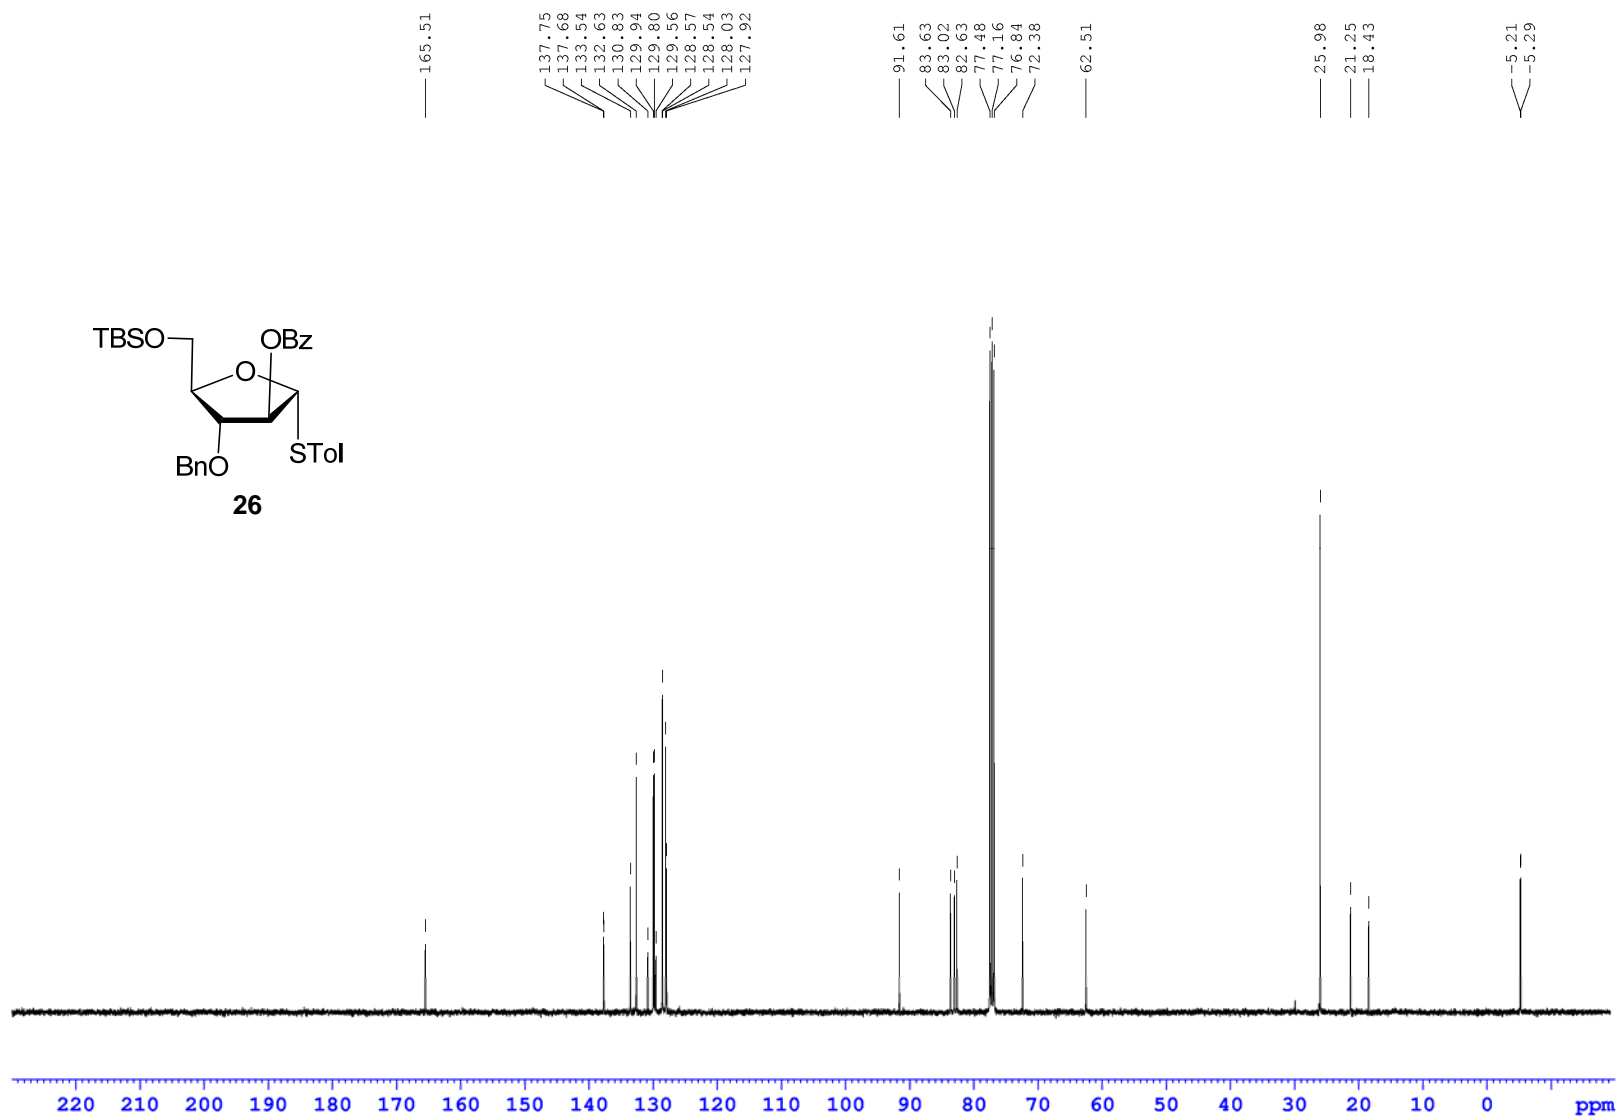

Supplementary Figure 75. <sup>13</sup>C NMR spectrum of compound 26

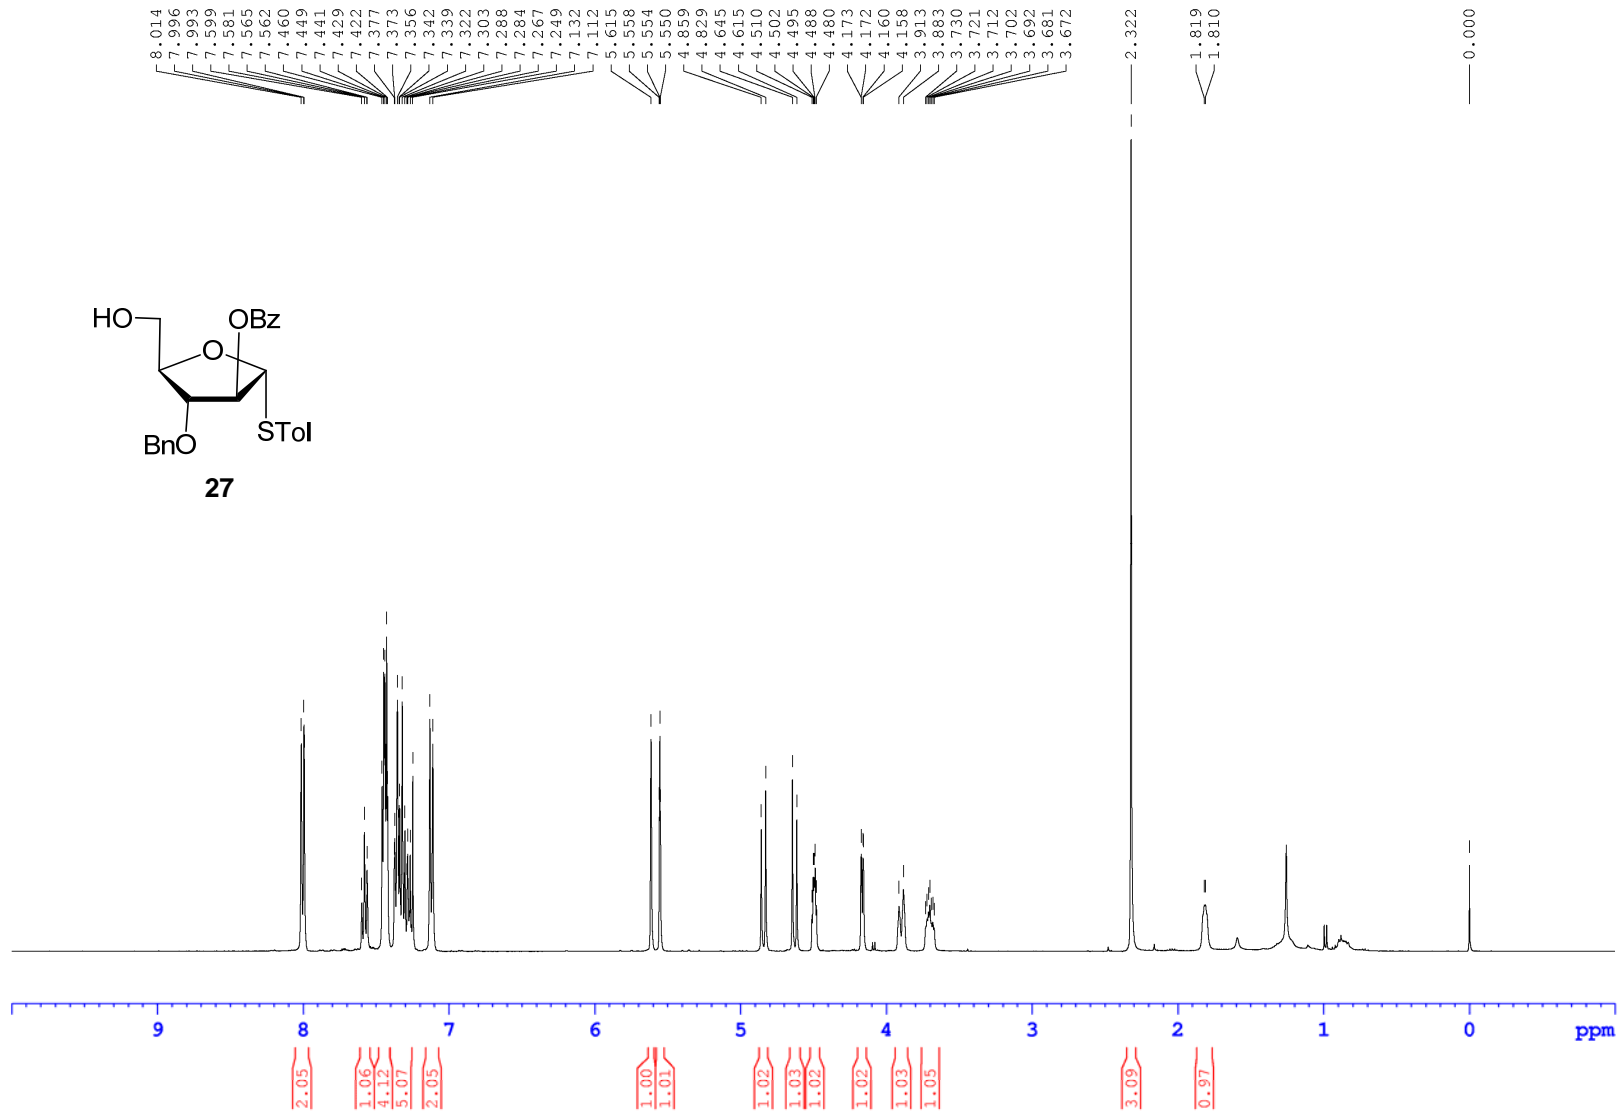

Supplementary Figure 76.  $^1\text{H}$  NMR spectrum of compound 27

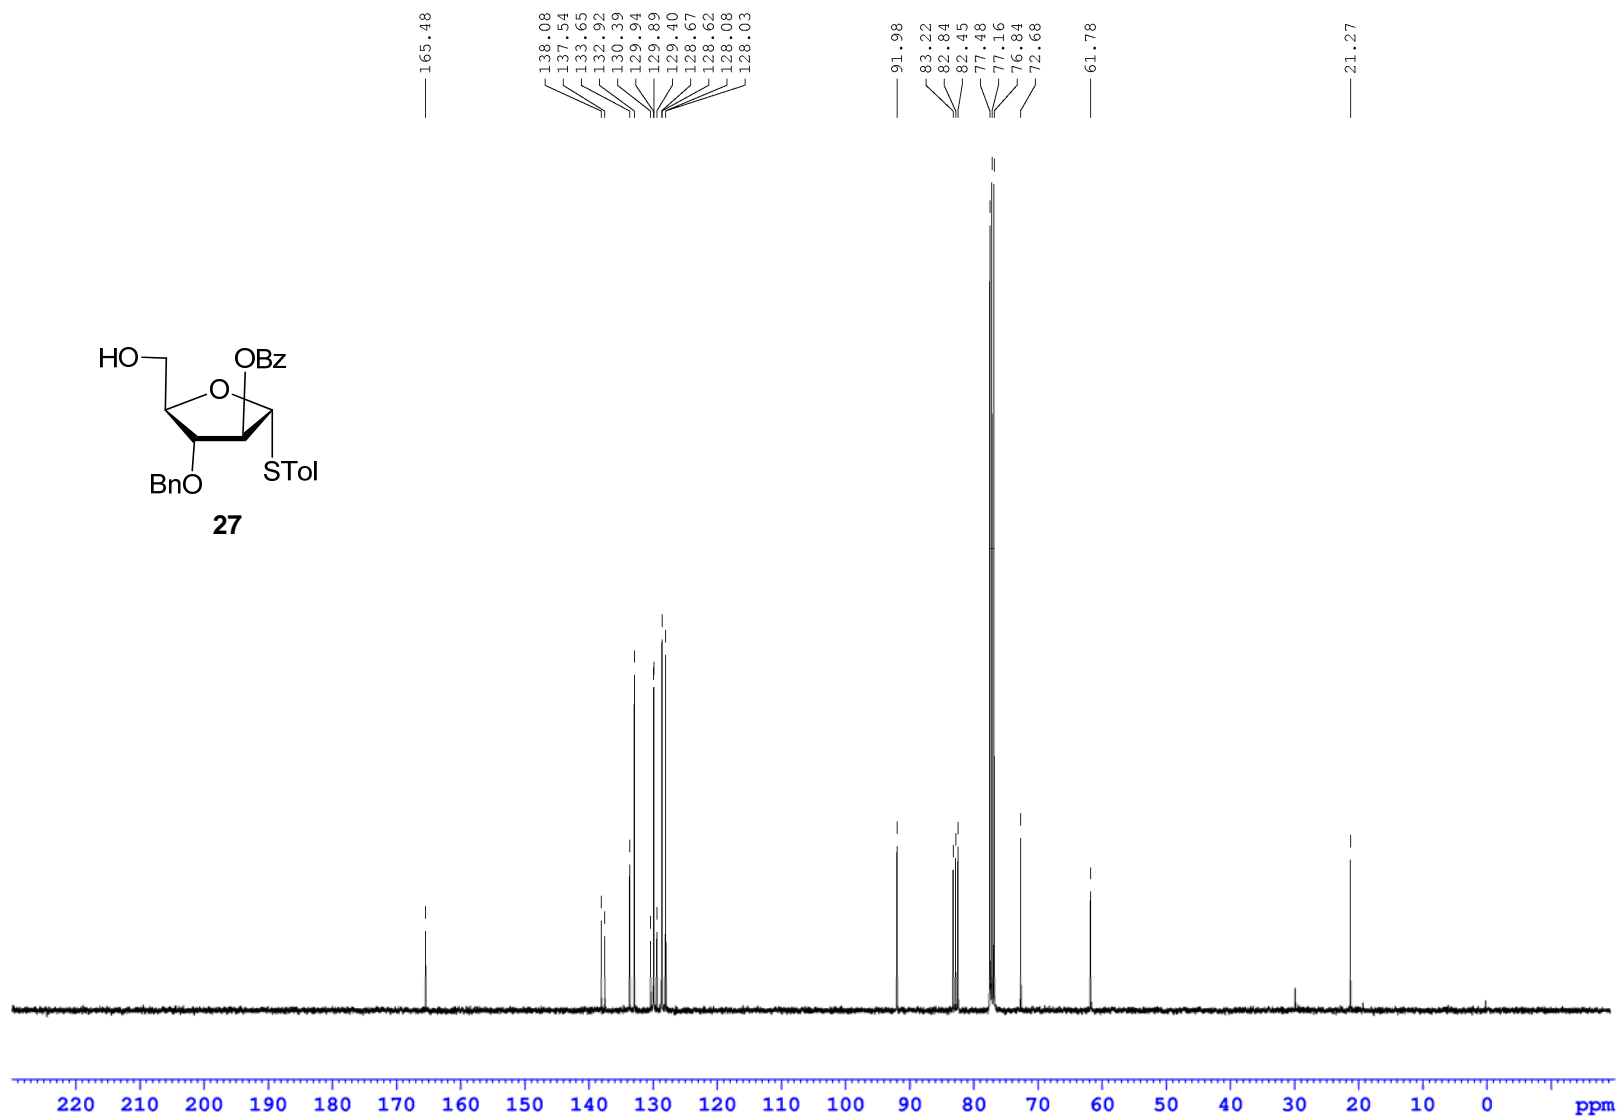

Supplementary Figure 77.  $^{13}\text{C}$  NMR spectrum of compound 27

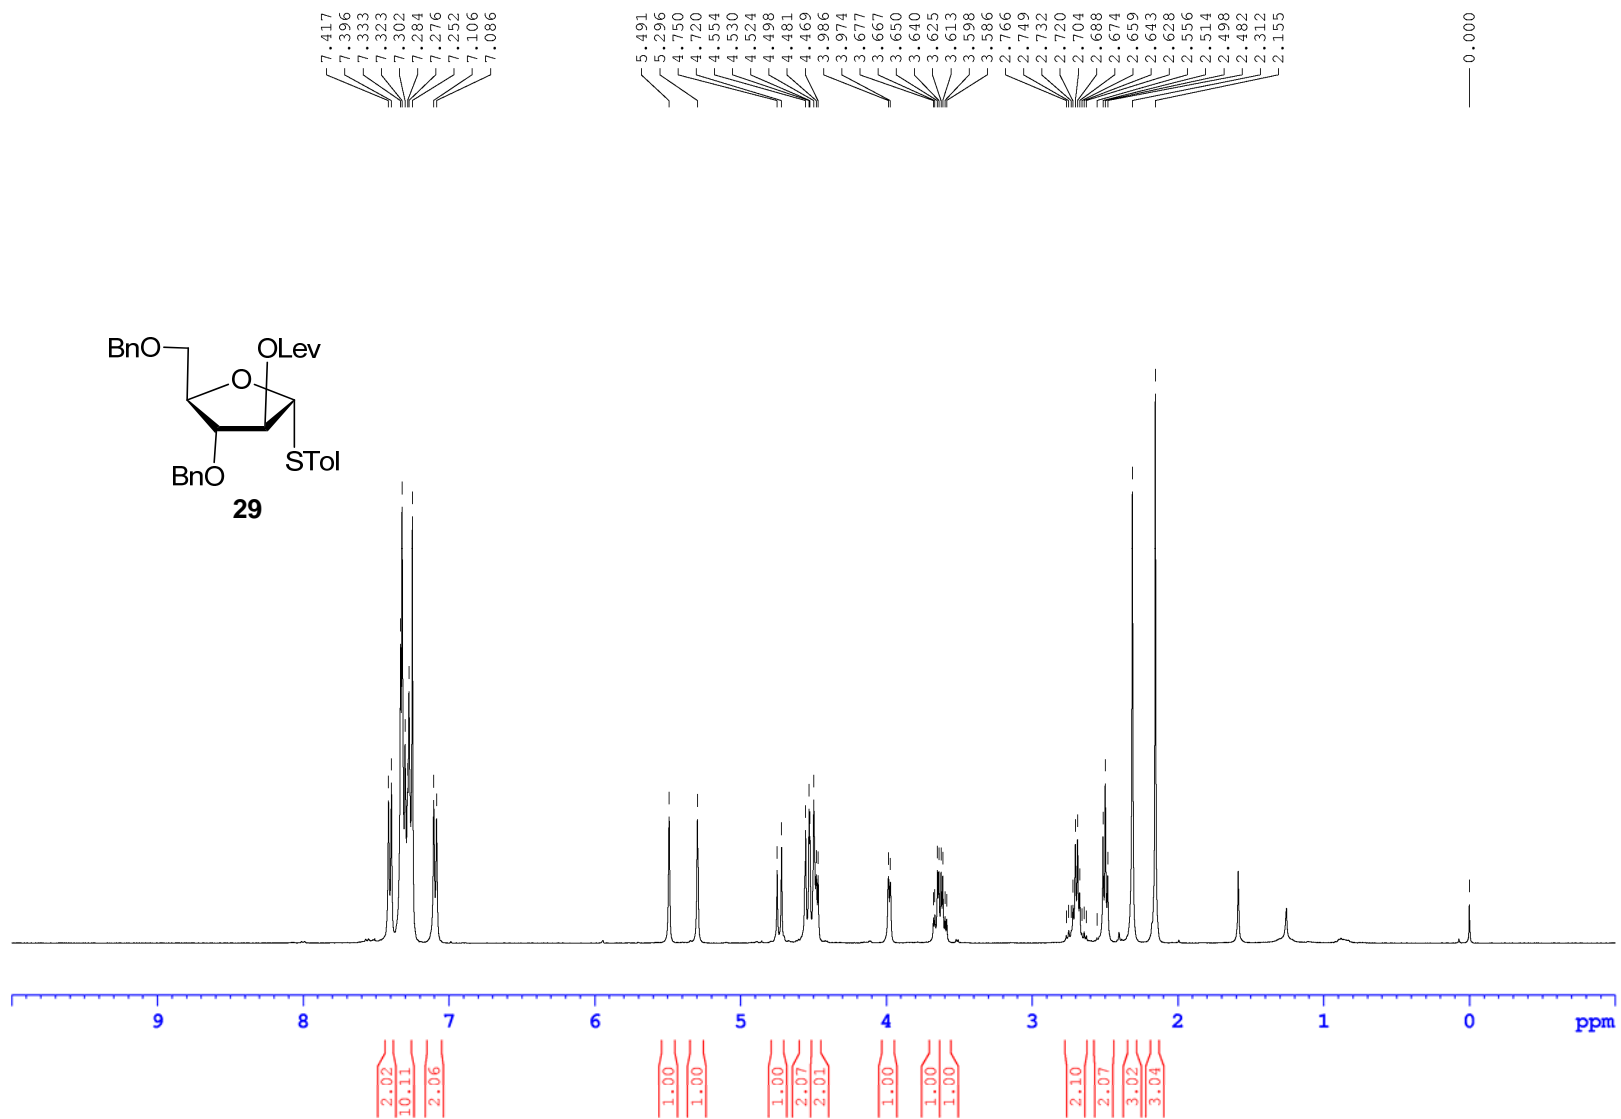

Supplementary Figure 78. <sup>1</sup>H NMR spectrum of compound 29

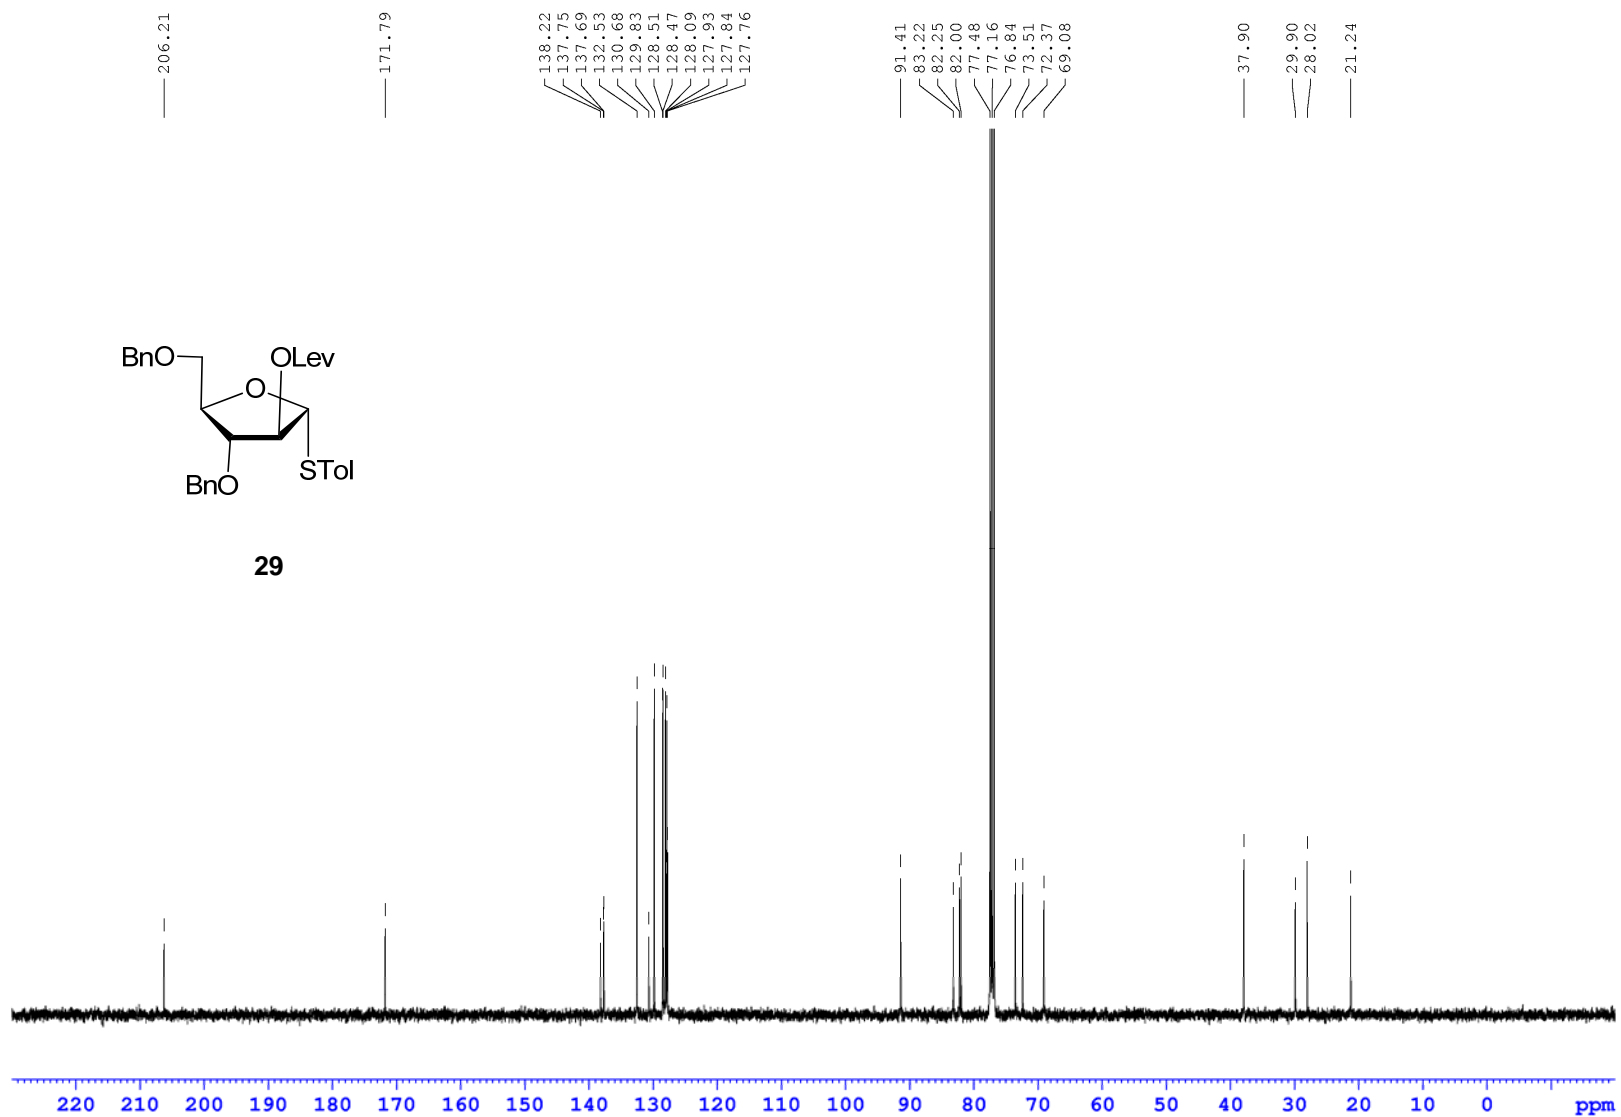

Supplementary Figure 79. <sup>13</sup>C NMR spectrum of compound 29





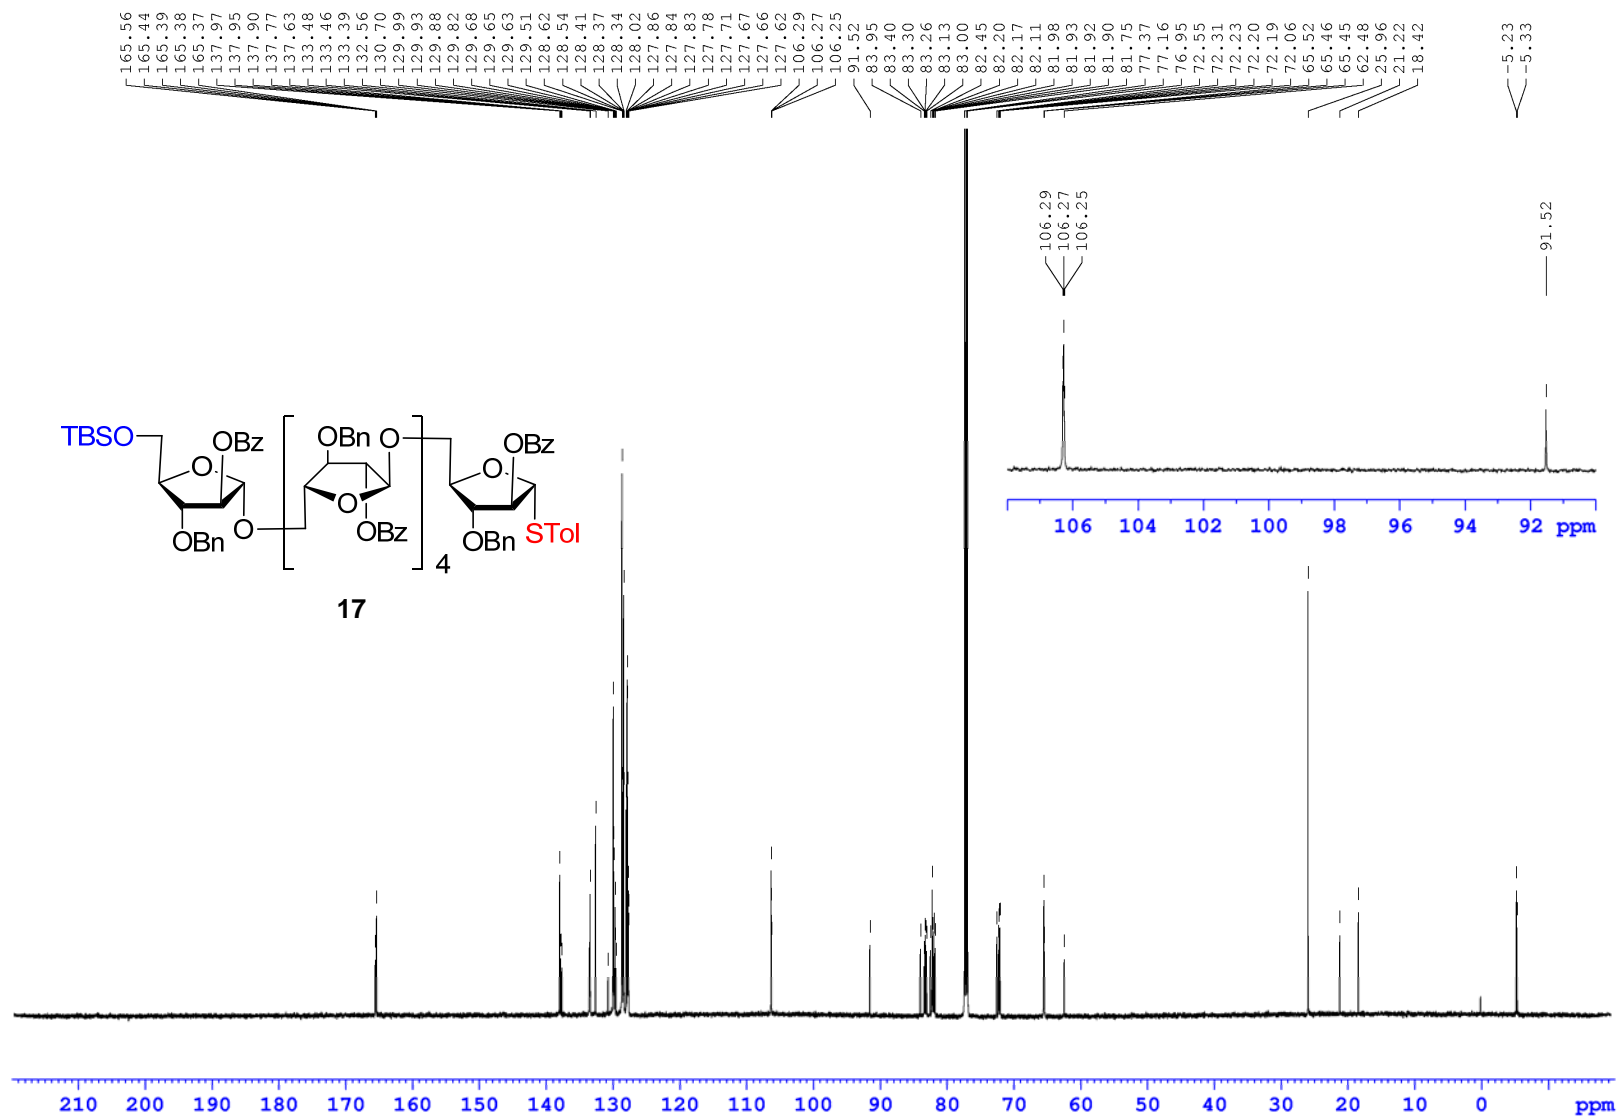

Supplementary Figure 81.  $^{13}\text{C}$  NMR spectrum of compound 17

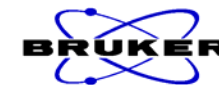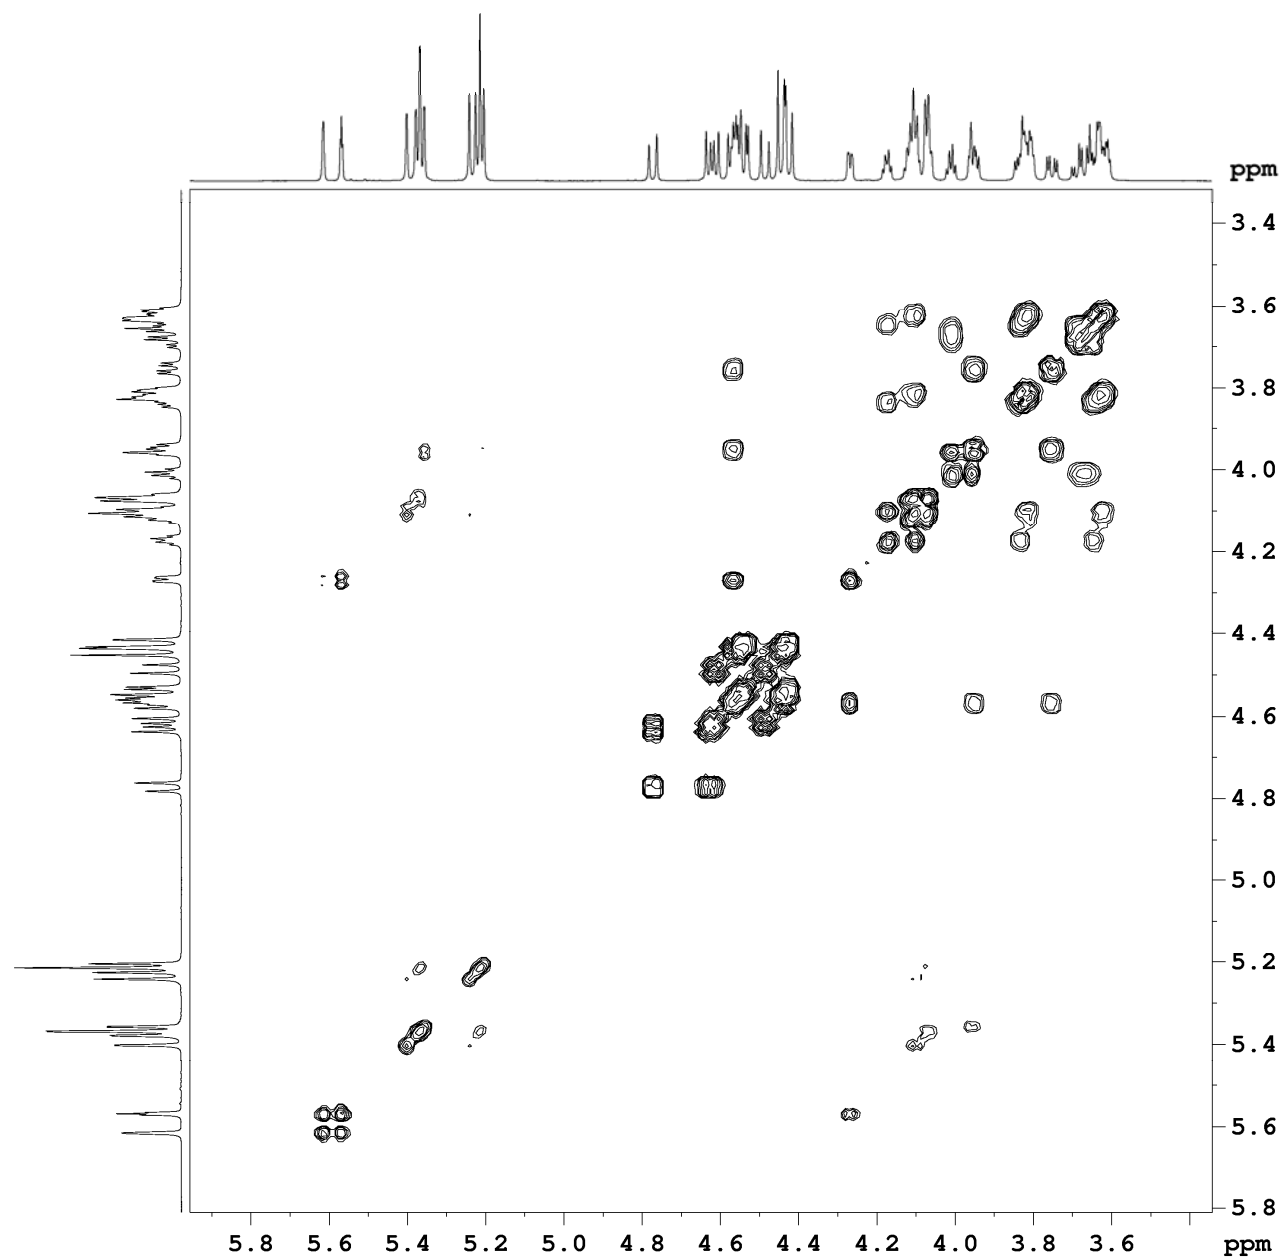

```
NAME          WY-0407
EXPNO         3
PROCNO        1
Date_         20151212
Time          11.02
INSTRUM       spect
PROBHD        5 mm CPTCI 1H-
PULPROG       cosygpmfzf
TD            2048
SOLVENT       CDC13
NS            4
DS            8
SWH           6631.300 Hz
FIDRES        3.237939 Hz
AQ            0.1544692 sec
RG            203
DW            75.400 usec
DE            10.00 usec
TE            300.4 K
D0            0.00000300 sec
D1            2.00000000 sec
D13           0.00000400 sec
D16           0.00020000 sec
IN0           0.00015080 sec
```

```
===== CHANNEL f1 =====
NUC1          1H
P1            12.00 usec
ND0           1
TD            1024
SFO1          600.1324 MHz
FIDRES        6.475875 Hz
SW            11.050 ppm
FnMODE        QF
SI            1024
SF            600.1300235 MHz
WDW           SINE
SSB           0
LB            0.00 Hz
GB            0
PC            1.40
SI            1024
MC2           QF
SF            600.1300232 MHz
WDW           SINE
SSB           0
LB            0.00 Hz
GB            0
```

Supplementary Figure 82. COSY NMR spectrum of compound 17

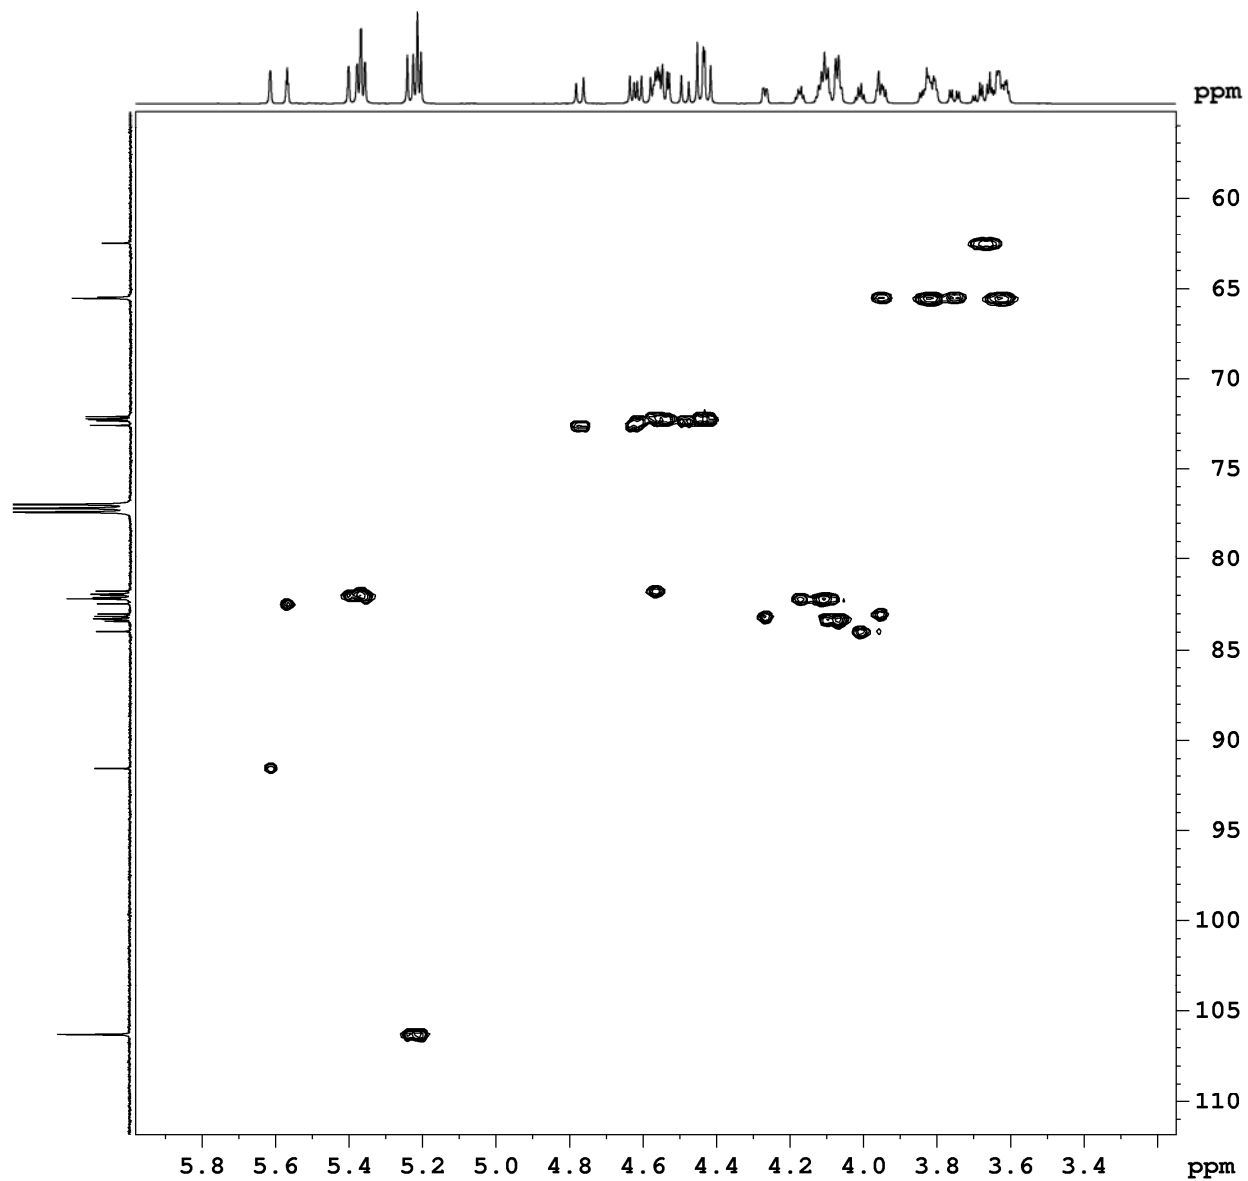

```

NAME          WY-0407
EXPNO         4
PROCNO        1
Date_         20151212
Time          13.36
INSTRUM       spect
PROBHD        5 mm CPTCI 1H-
PULPROG       hsqcetgp
TD            2048
SOLVENT       CDC13
NS            8
DS            16
SWH           6631.300 Hz
FIDRES        3.237939 Hz
AQ            0.1544692 sec
RG            203
DW            75.400 usec
DE            10.00 usec
TE            300.4 K
CNST2         145.0000000
D0            0.00000300 sec
D1            1.50000000 sec
D4            0.00172414 sec
D11           0.03000000 sec
D13           0.00000400 sec
D16           0.00020000 sec
INO           0.00002000 sec
ZGPTNS

```

```

===== CHANNEL f1 =====
NUC1          1H
P1            12.00 usec
P2            24.00 usec
P28           0.00 usec
ND0           2
TD            512
SF01          150.9141 MHz
FIDRES        48.822838 Hz
SW            165.639 ppm
FnMODE        Echo-Antiecho
SI            1024
SF            600.1300243 MHz
WDW           QSINE
SSB           2
LB            0.00 Hz
GB            0
PC            1.40
SI            1024
MC2           echo-antiecho
SF            150.9027794 MHz
WDW           QSINE
SSB           2
LB            0.00 Hz
GB            0

```

Supplementary Figure 83. HSQC NMR spectrum of compound 17

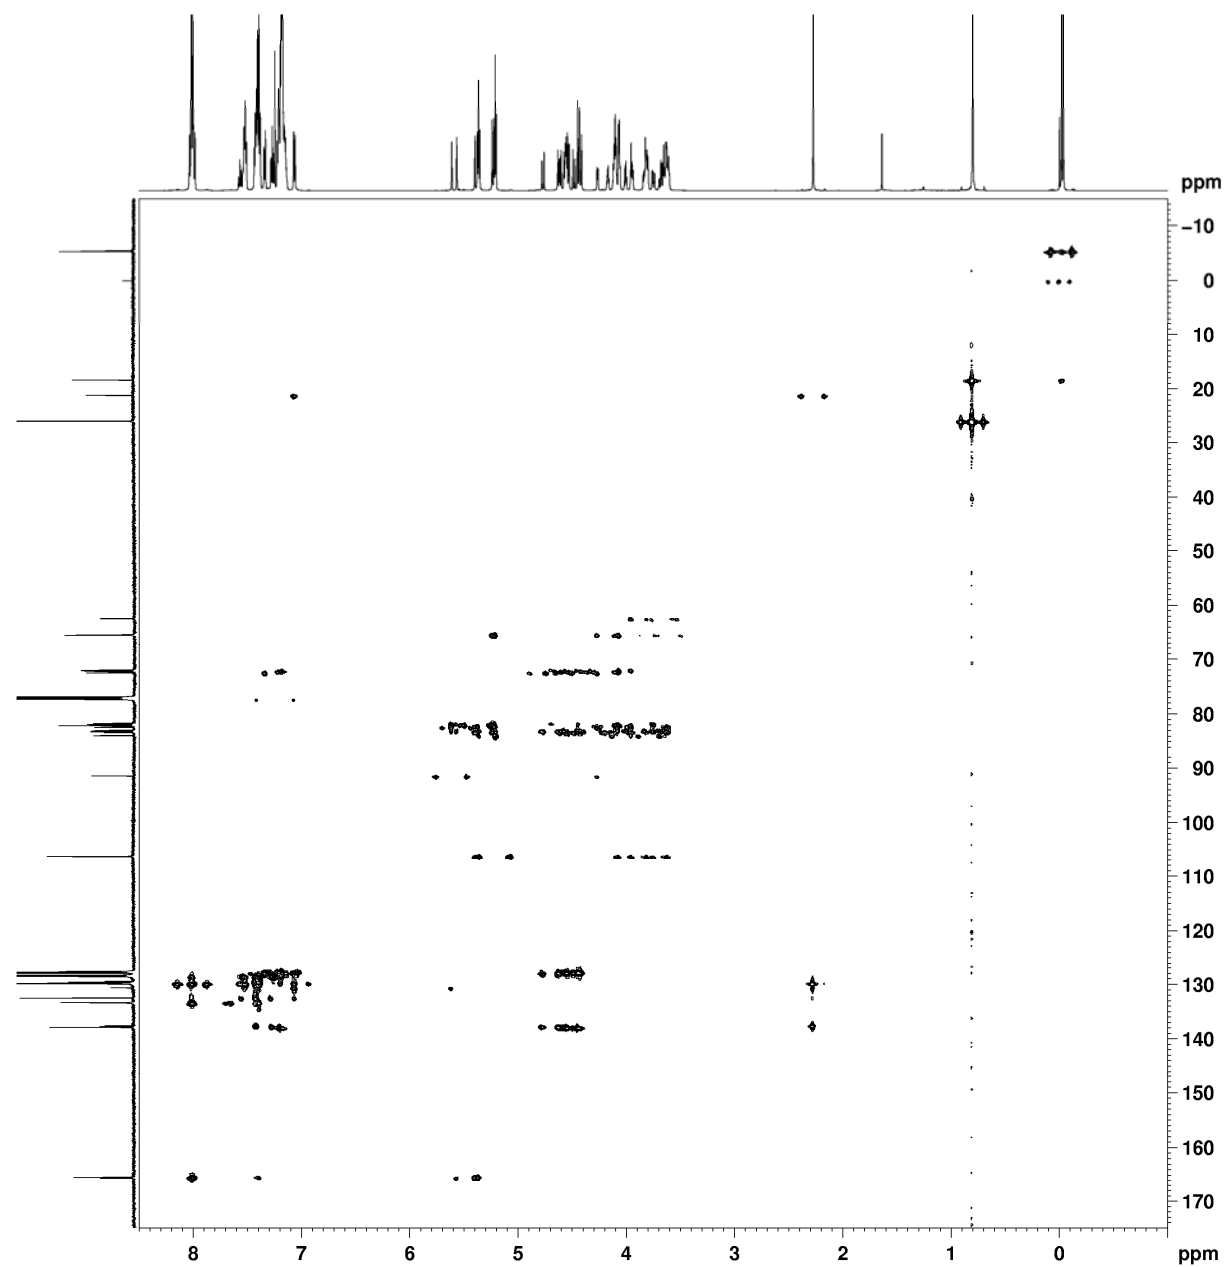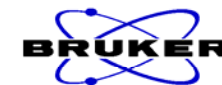

```

NAME          WY-0407
EXPNO         5
PROCNO        1
Date_         20151212
Time          15.31
INSTRUM       spect
PROBHD        5 mm CPTCI 1H-
PULPROG       hmbcgpndqf
TD            2048
SOLVENT       CDCl3
NS            16
DS            16
SWH           6631.300 Hz
FIDRES        3.237939 Hz
AQ            0.1544692 sec
RG            203
DW            75.400 usec
DE            10.00 usec
TE            300.5 K
CNST13        8.0000000
D0            0.00000300 sec
D1            1.50000000 sec
D6            0.06250000 sec
D16           0.00020000 sec
IN0           0.00001680 sec

```

```

===== CHANNEL f1 =====
NUC1          1H
P1            12.00 usec
P2            24.00 usec
ND0           2
TD            512
SFO1          150.9151 MHz
FIDRES        58.129791 Hz
SW            197.213 ppm
FhMODE        QF
SI            1024
SF            600.1300228 MHz
WDW           SINE
SSB           0
LB            0.00 Hz
GB            0
PC            1.40
SI            1024
MC2           QF
SF            150.9027799 MHz
WDW           STNF
SSB           0
LB            0.00 Hz
GB            0

```

Supplementary Figure 84. HMBC NMR spectrum of compound 17



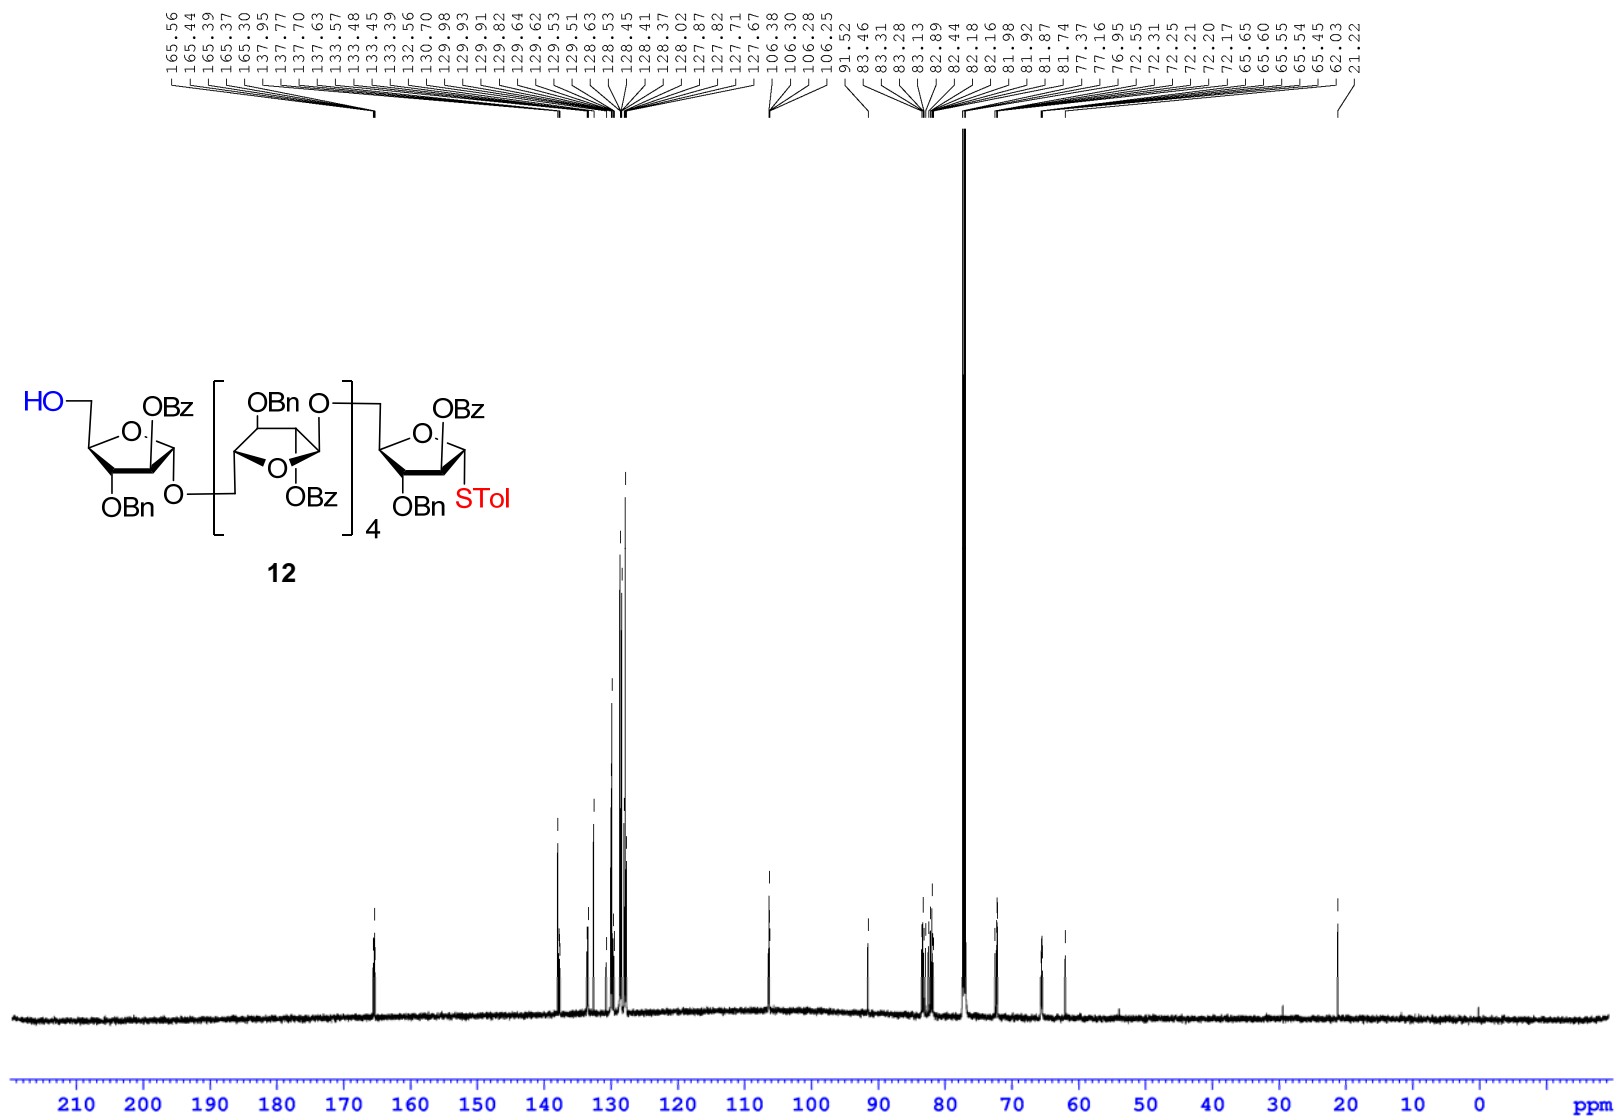

Supplementary Figure 86. <sup>13</sup>C NMR spectrum of compound 12

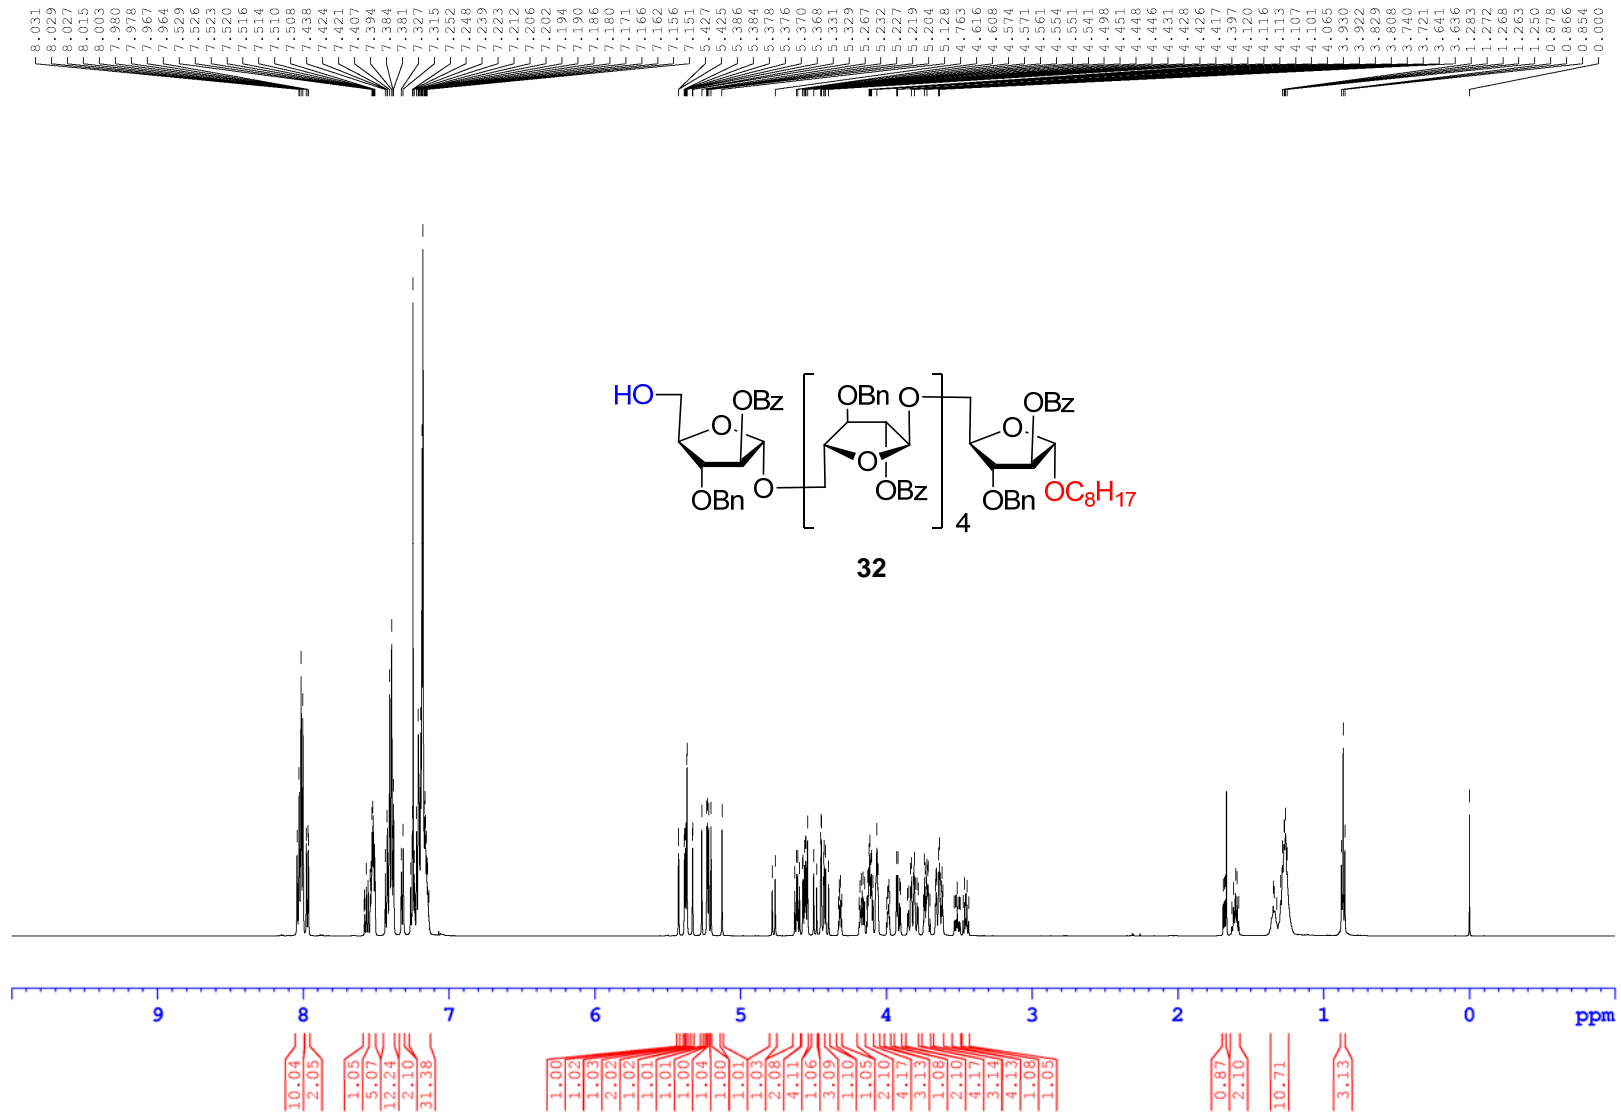

Supplementary Figure 87. <sup>1</sup>H NMR spectrum of compound 32

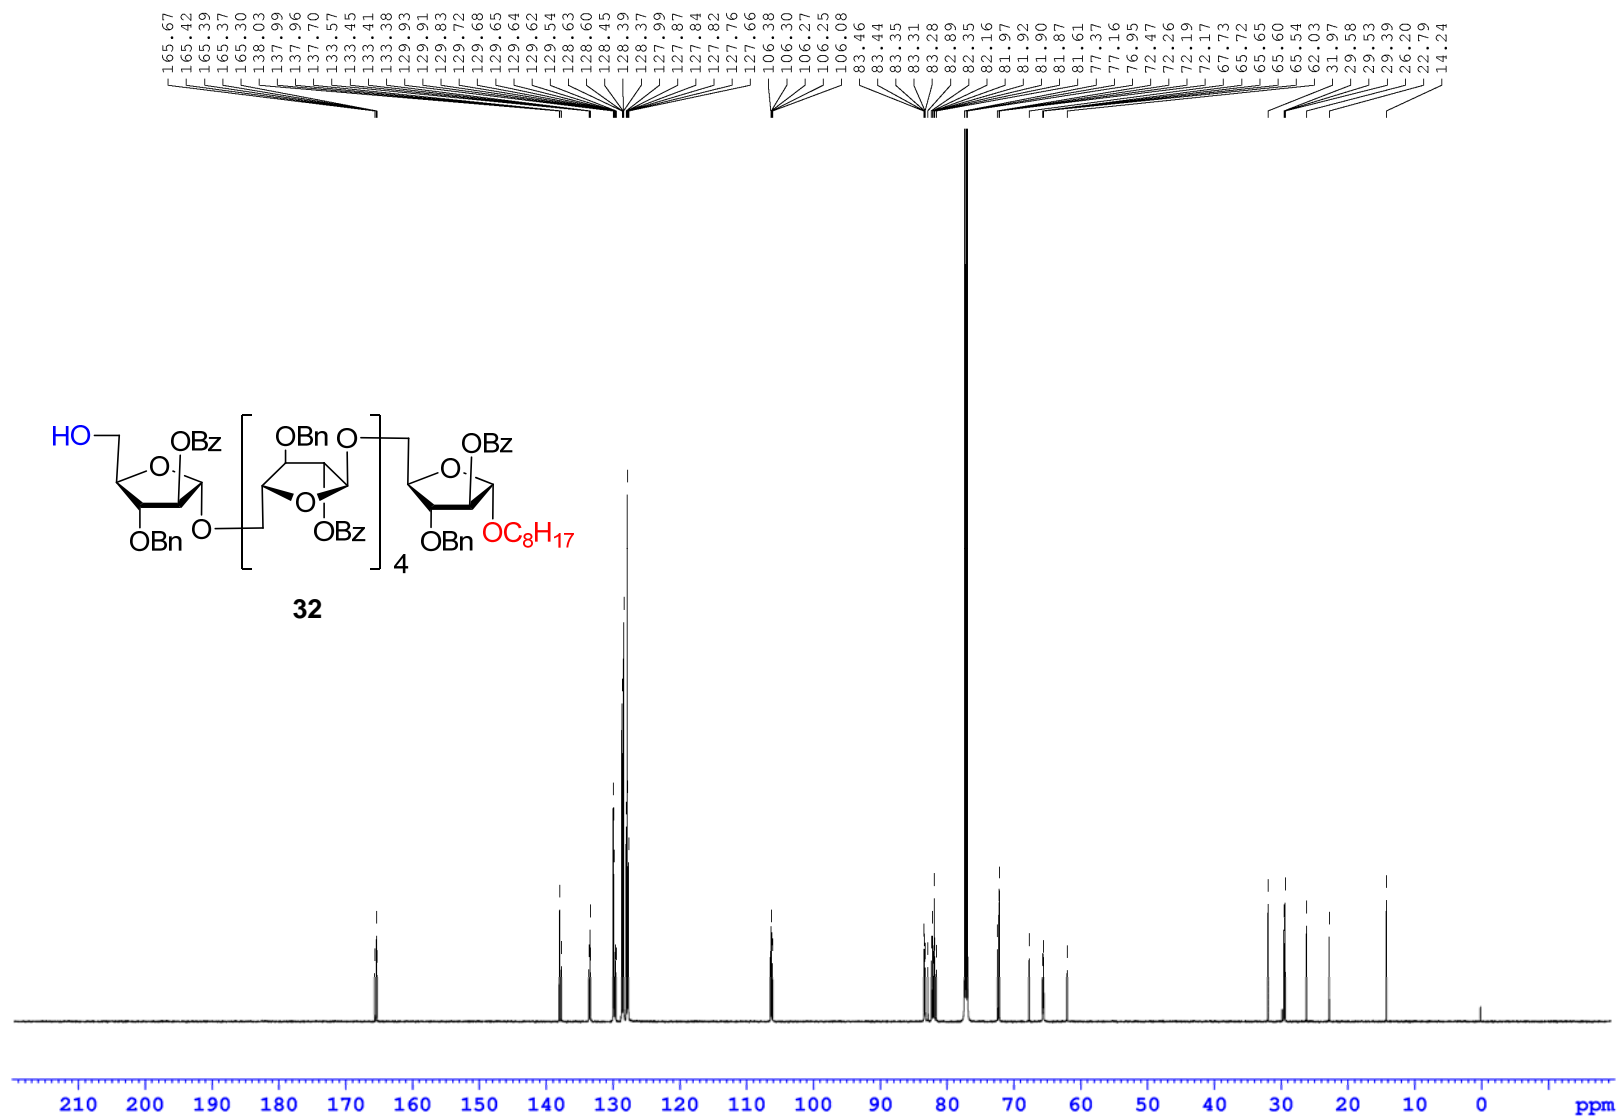

Supplementary Figure 88.  $^{13}\text{C}$  NMR spectrum of compound 32





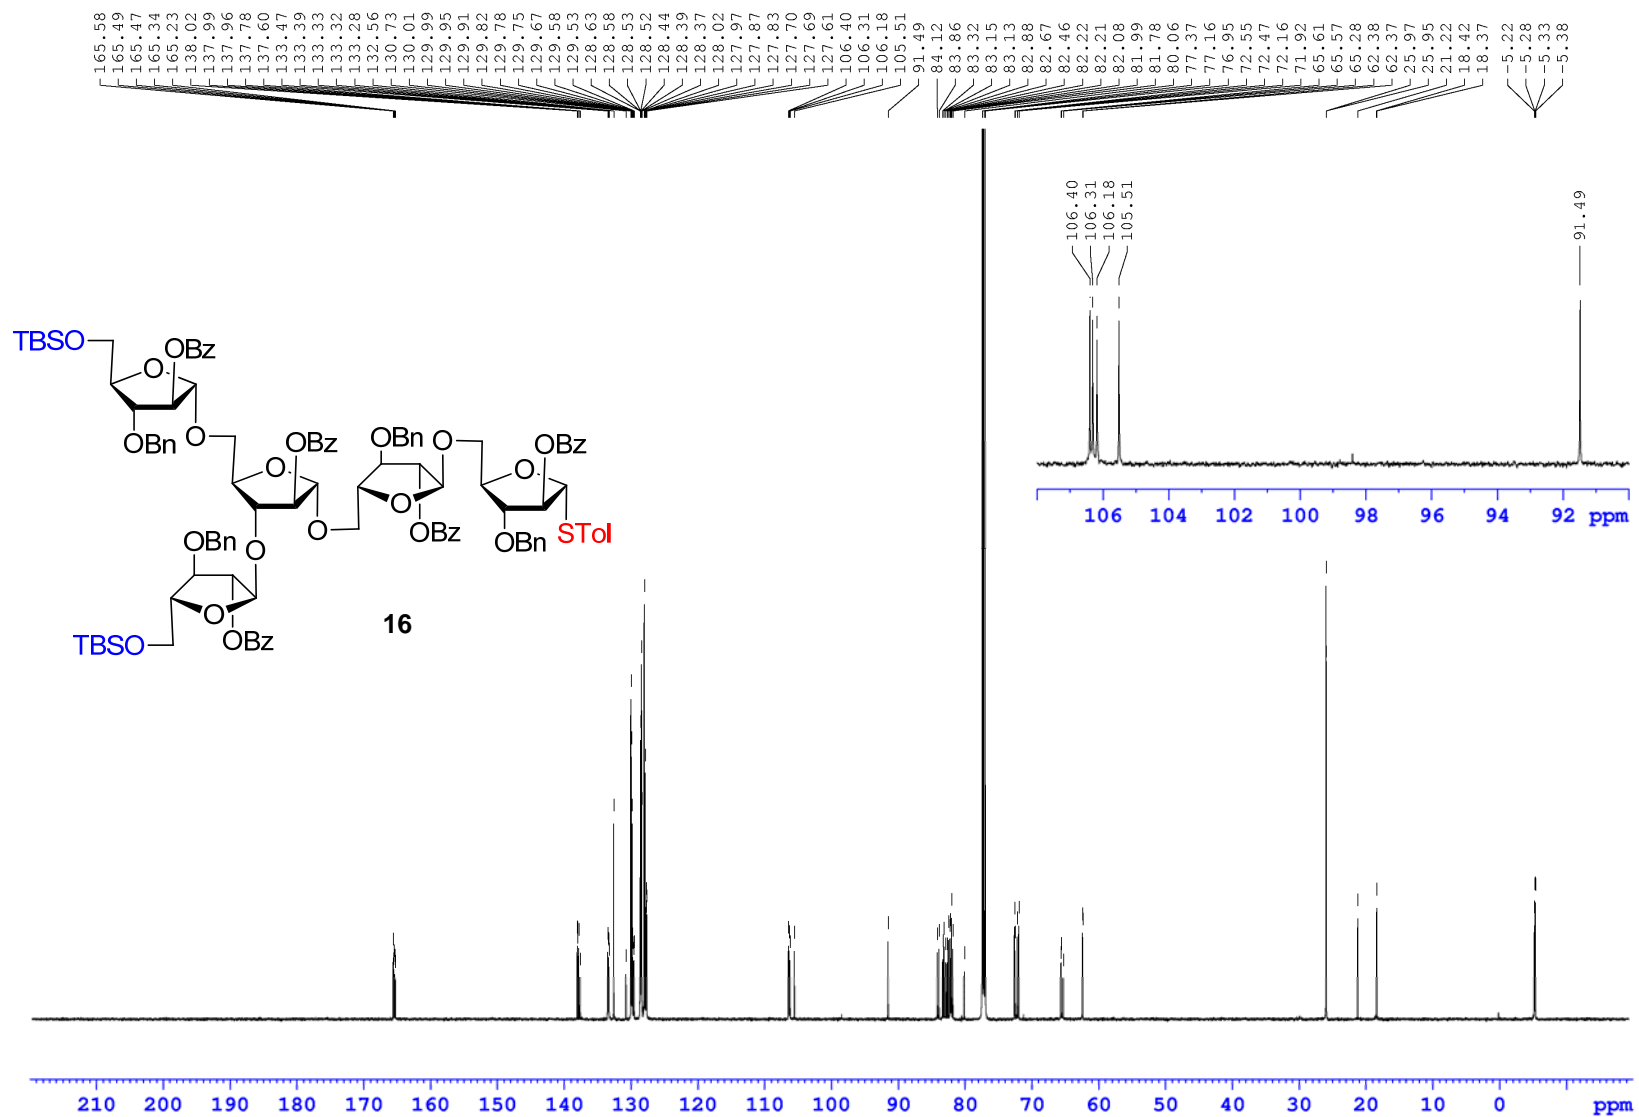

Supplementary Figure 90. <sup>13</sup>C NMR spectrum of compound 16

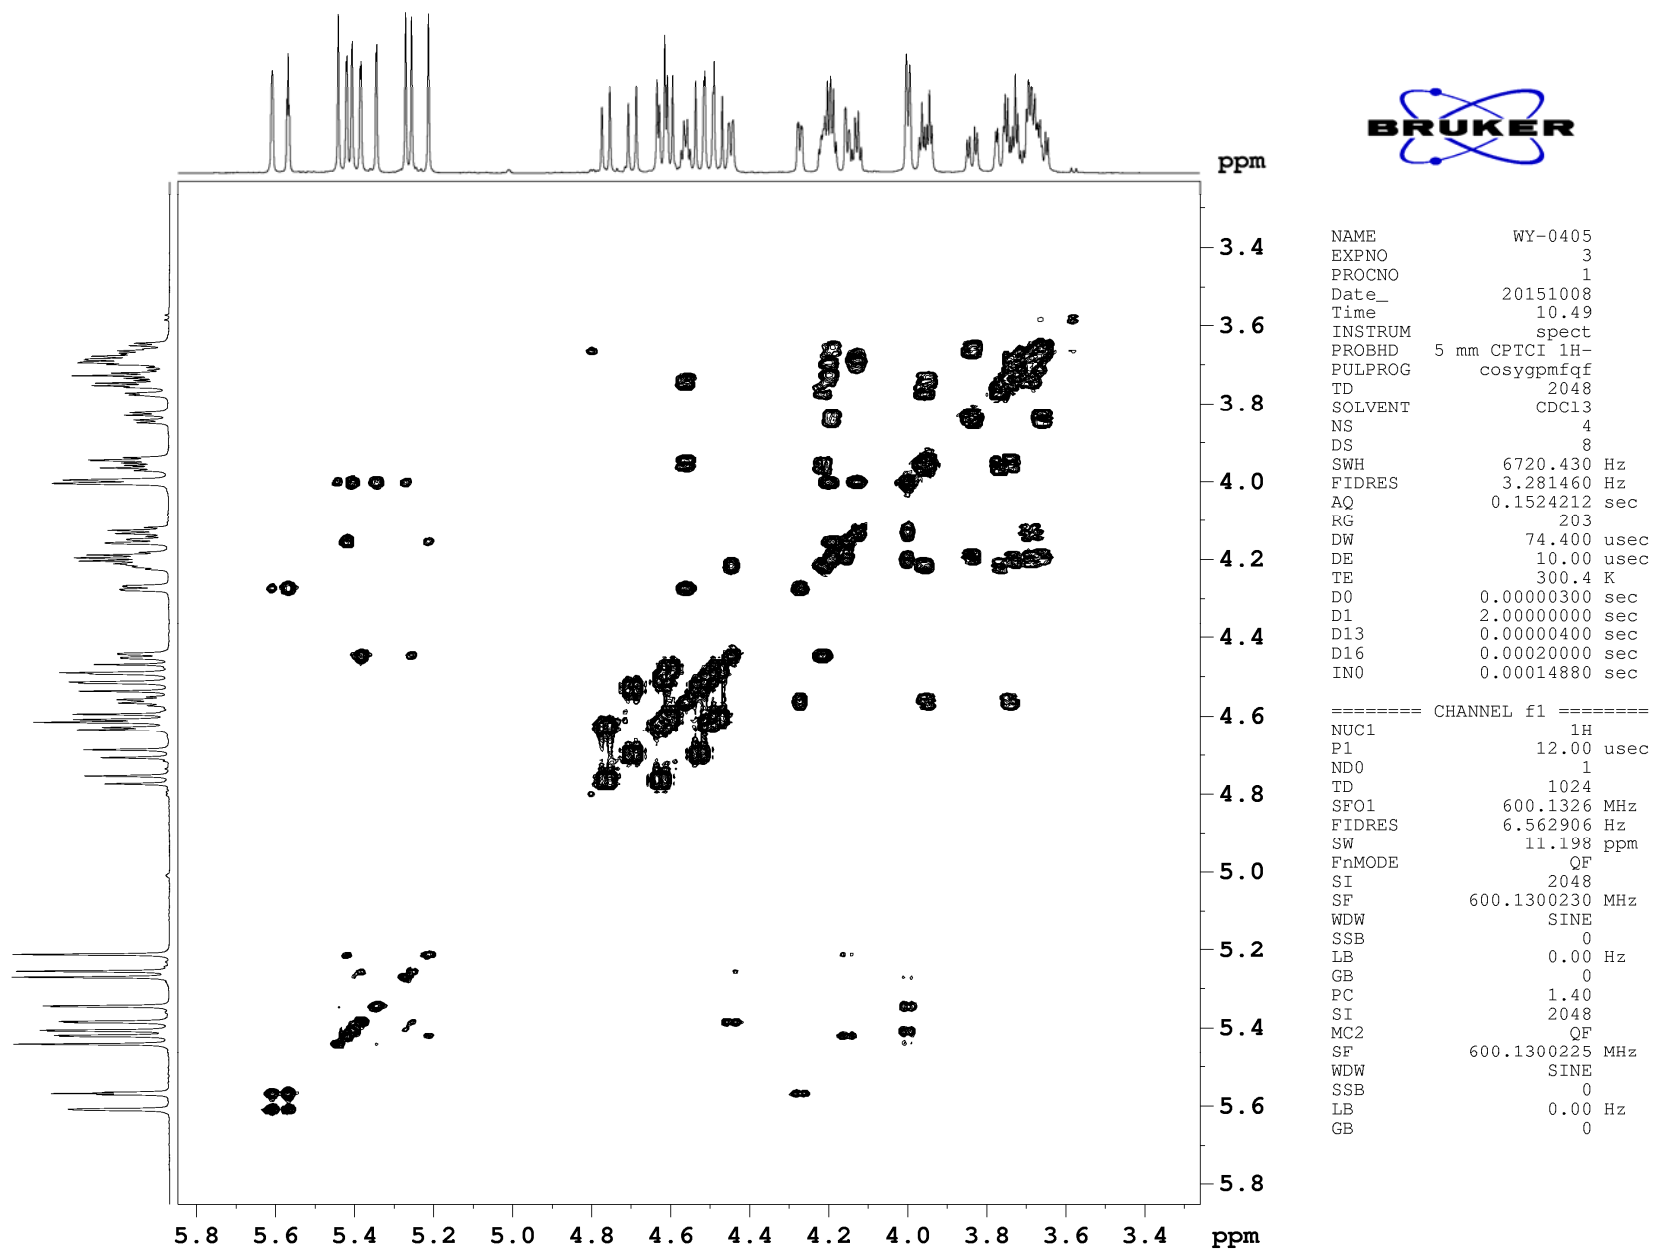

Supplementary Figure 91. COSY NMR spectrum of compound 16

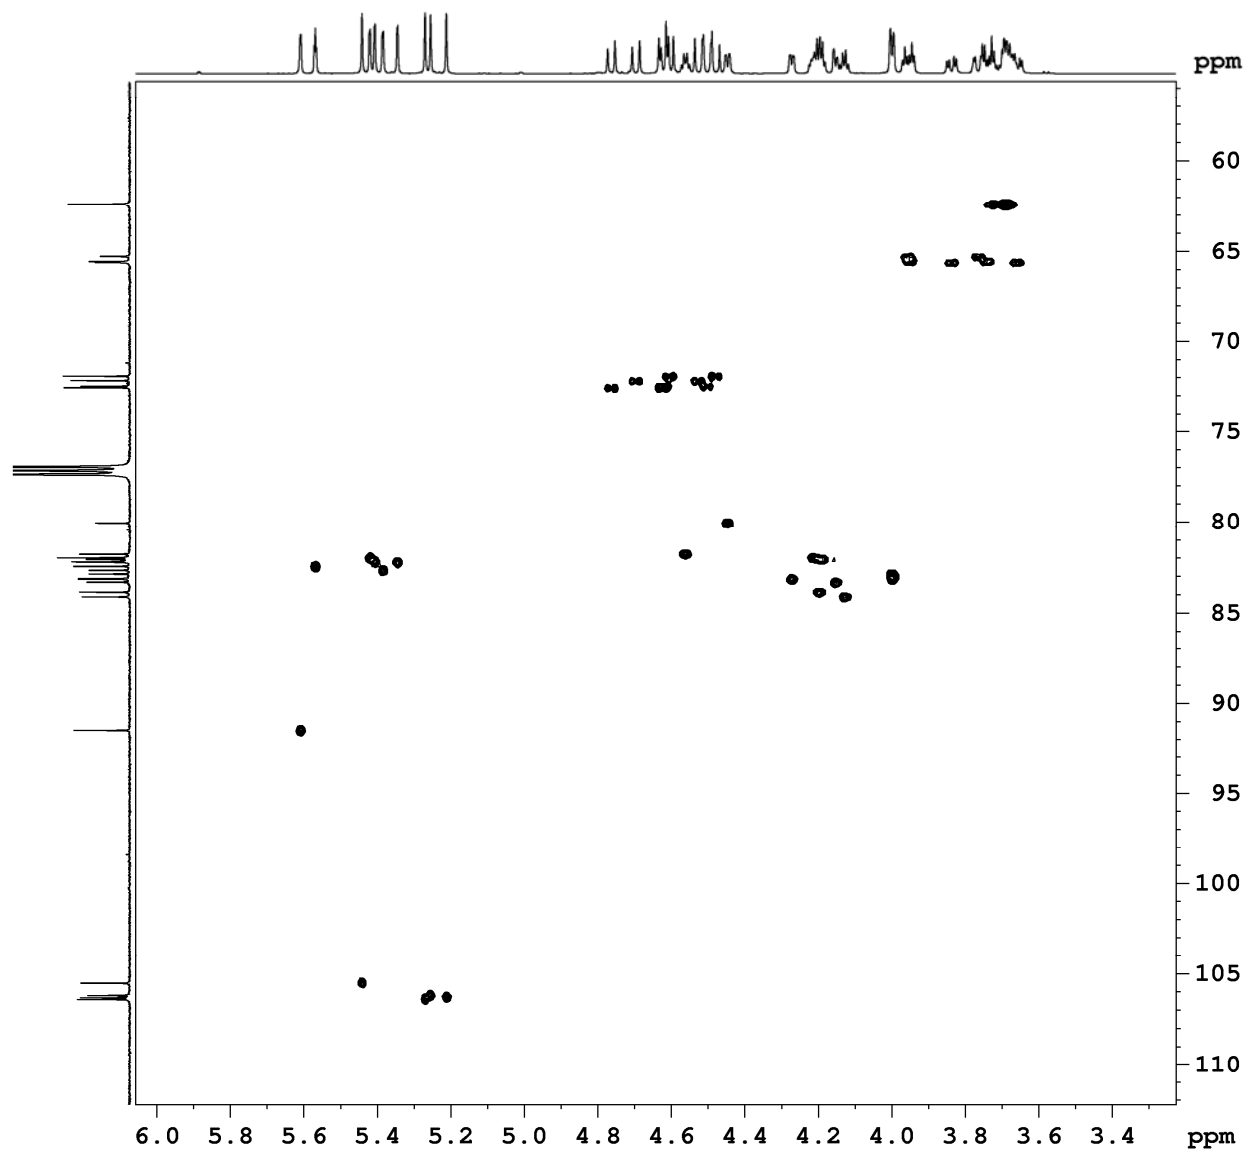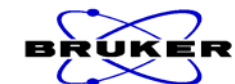

```

NAME           WY-0405
EXPNO          4
PROCNO         1
Date_          20151008
Time           17.21
INSTRUM        spect
PROBHD         5 mm CPTCI 1H-
PULPROG        hsqcetgpsi
TD             2048
SOLVENT        CDC13
NS             8
DS             16
SWH            6720.430 Hz
FIDRES         3.281460 Hz
AQ             0.1524212 sec
RG             203
DW             74.400 usec
DE             10.00 usec
TE             300.4 K
CNST2          145.0000000
D0             0.00000300 sec
D1             1.50000000 sec
D4             0.00172414 sec
D11            0.03000000 sec
D13            0.00000400 sec
D16            0.00020000 sec
D24            0.00110000 sec
INO            0.00002000 sec
ZGPTNS

```

```

===== CHANNEL f1 =====
NUC1           1H
P1             12.00 usec
P2             24.00 usec
P28            0.00 usec
ND0            ?
TD             512
SF01           150.9141 MHz
FIDRES         48.822838 Hz
SW             165.639 ppm
FnMODE         Echo-Antiecho
SI             2048
SF             600.1300221 MHz
WDW            QSINE
SSB            2
LB             0.00 Hz
GB             0
PC             1.40
SI             1024
MC2            echo-antiecho
SF             150.9027818 MHz
WDW            QSINE
SSB            2
LB             0.00 Hz
GB             0

```

Supplementary Figure 92. HSQC NMR spectrum of compound 16

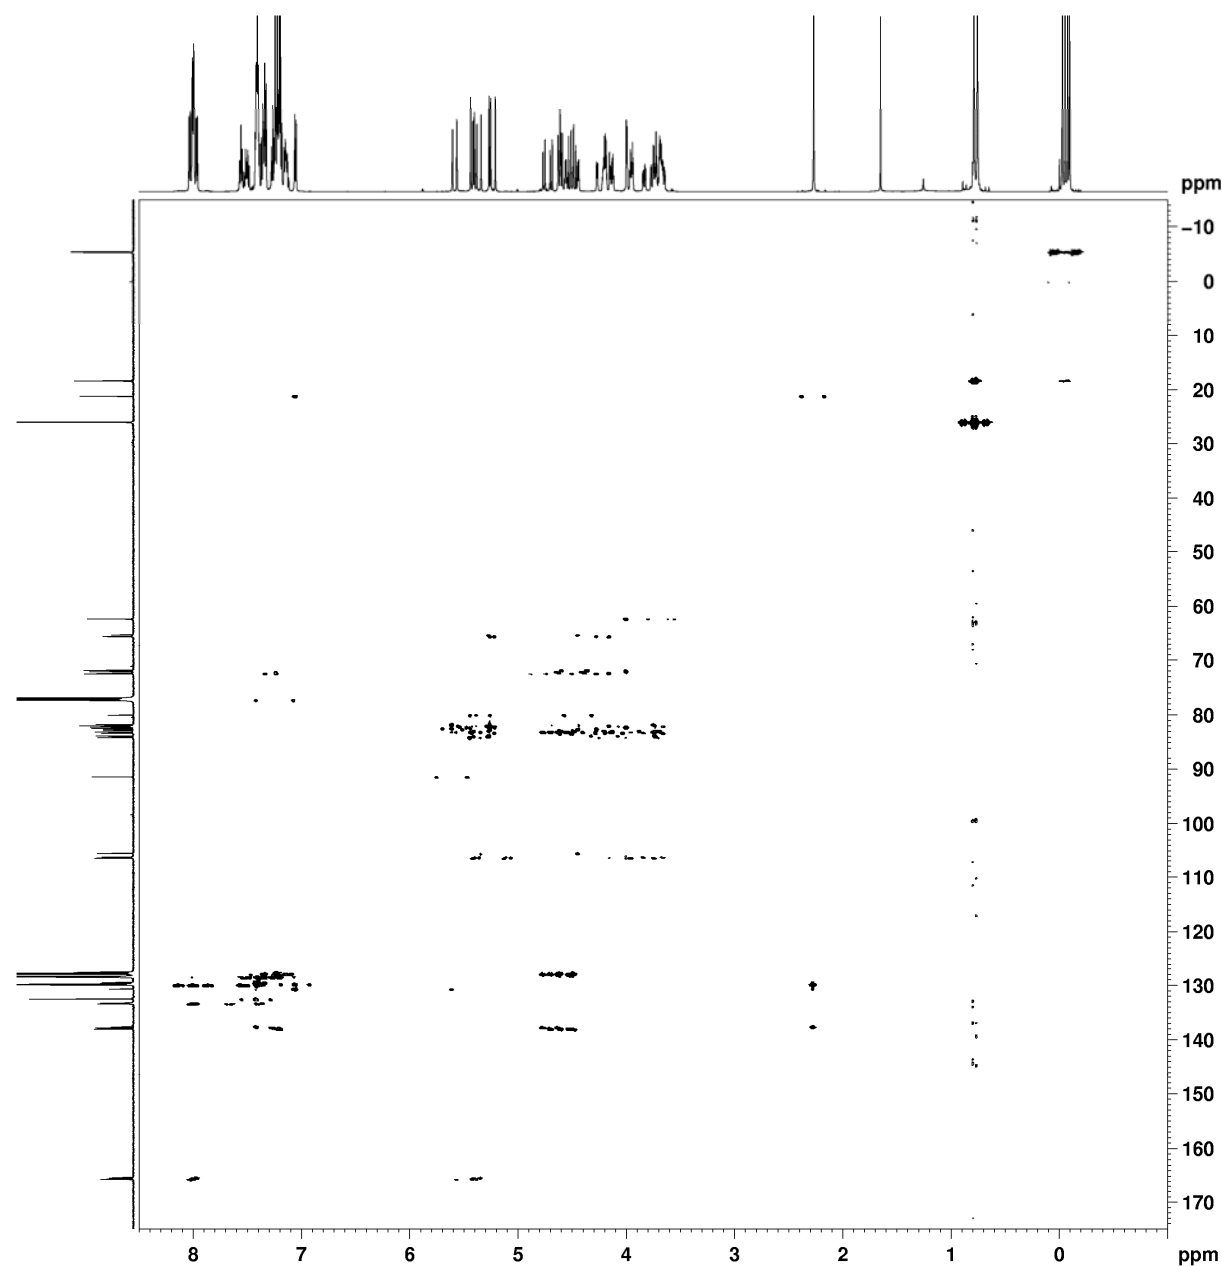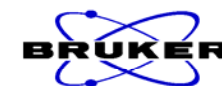

```

NAME          WY-0405
EXPNO         5
PROCNO        1
Date_         20151008
Time          13.23
INSTRUM       spect
PROBHD        5 mm CPTCI 1H-
PULPROG       hmbcgpndqf
TD            2048
SOLVENT       CDCl3
NS            16
DS            16
SWH           6720.430 Hz
FIDRES        3.281460 Hz
AQ            0.1524212 sec
RG            203
DW            74.400 usec
DE            10.00 usec
TE            300.4 K
CNST13        8.0000000
D0            0.00000300 sec
D1            1.50000000 sec
D6            0.06250000 sec
D16           0.00020000 sec
IN0           0.00001725 sec

```

```

===== CHANNEL f1 =====
NUC1          1H
P1            12.00 usec
P2            24.00 usec
ND0           2
TD            1024
SFO1          150.915 MHz
FIDRES        28.328051 Hz
SW            192.214 ppm
FhMODE        QF
SI            2048
SF            600.1300227 MHz
WDW           SINE
SSB           0
LB            0.00 Hz
GB            0
PC            1.40
SI            2048
MC2           QF
SF            150.9027860 MHz
WDW           STNF
SSB           0
LB            0.00 Hz
GB            0

```

Supplementary Figure 93. HMBC NMR spectrum of compound 16

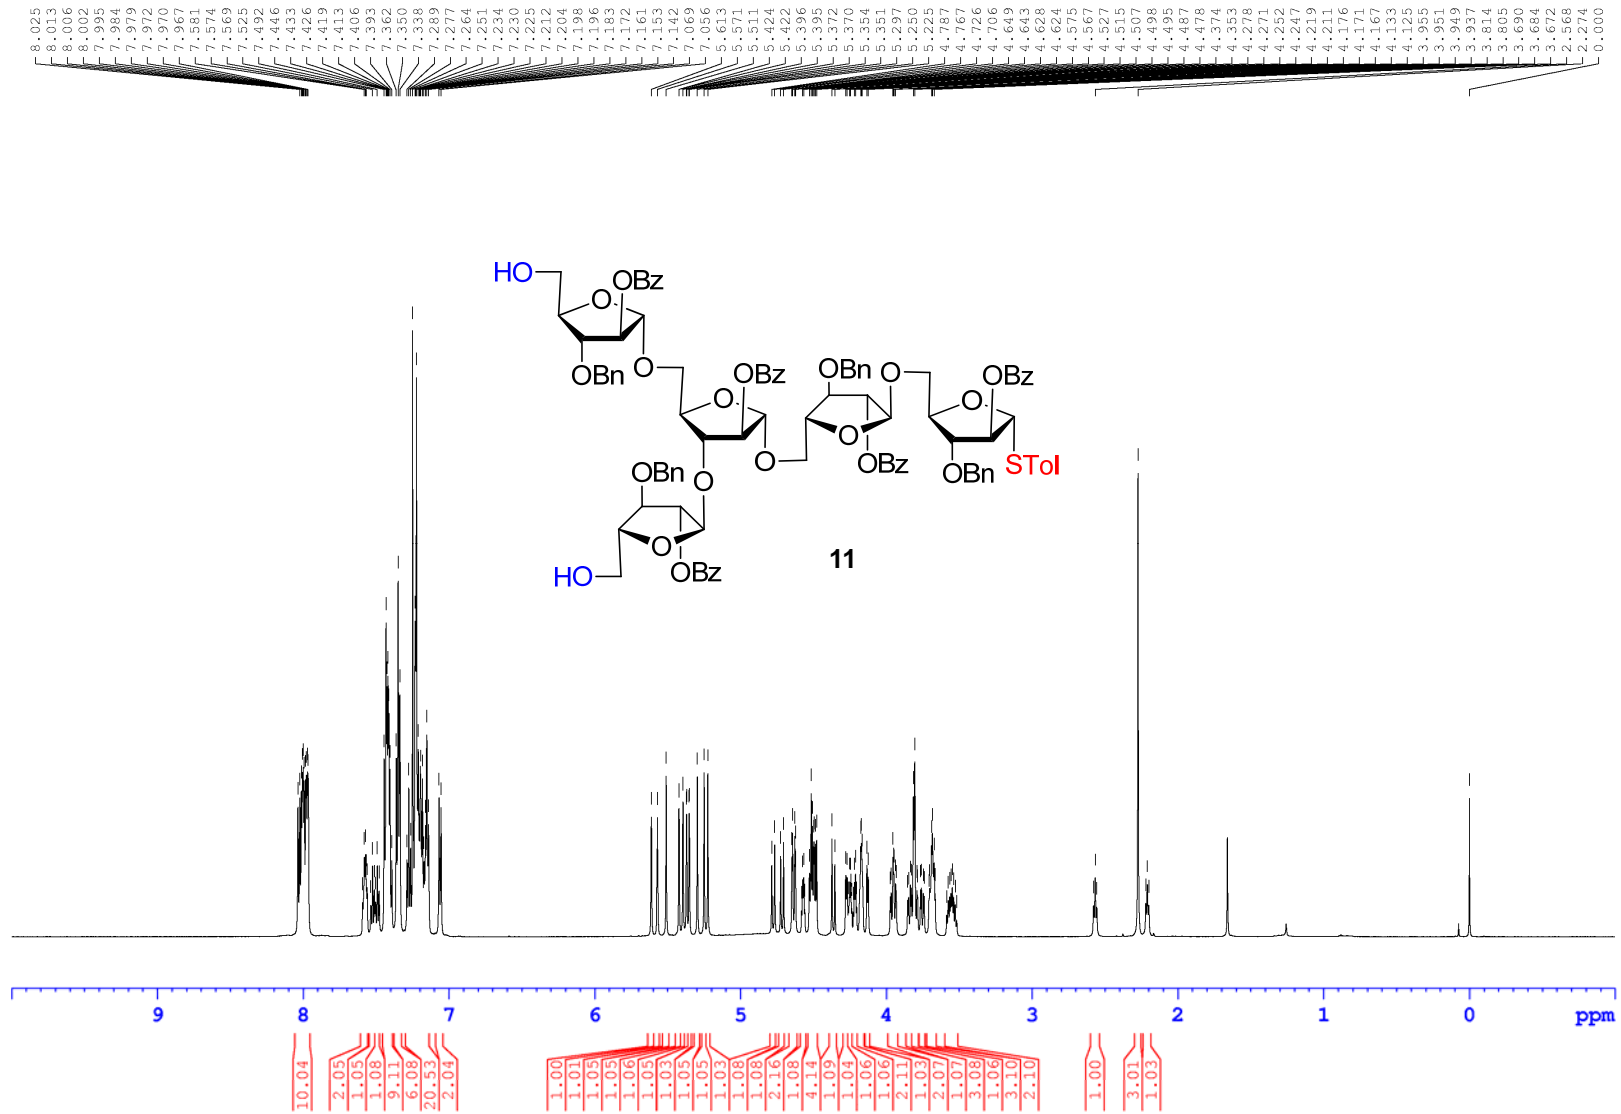

Supplementary Figure 94. <sup>1</sup>H NMR spectrum of compound 11

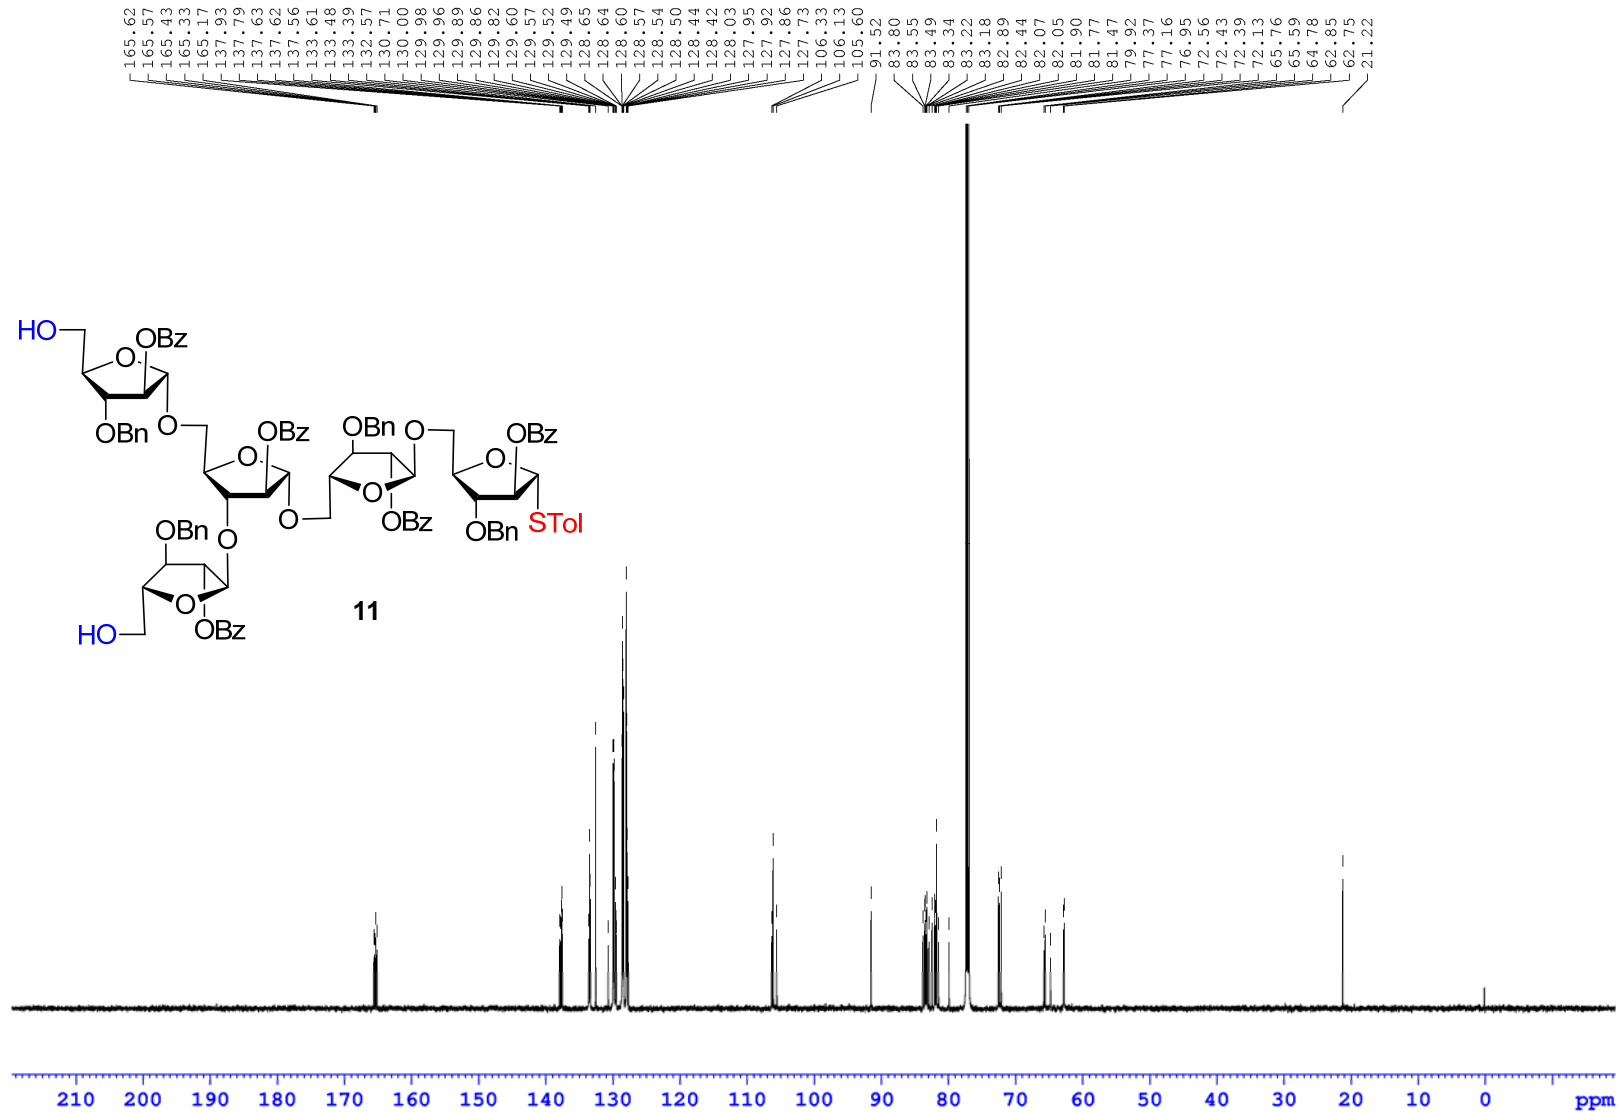

Supplementary Figure 95.  $^{13}\text{C}$  NMR spectrum of compound 11

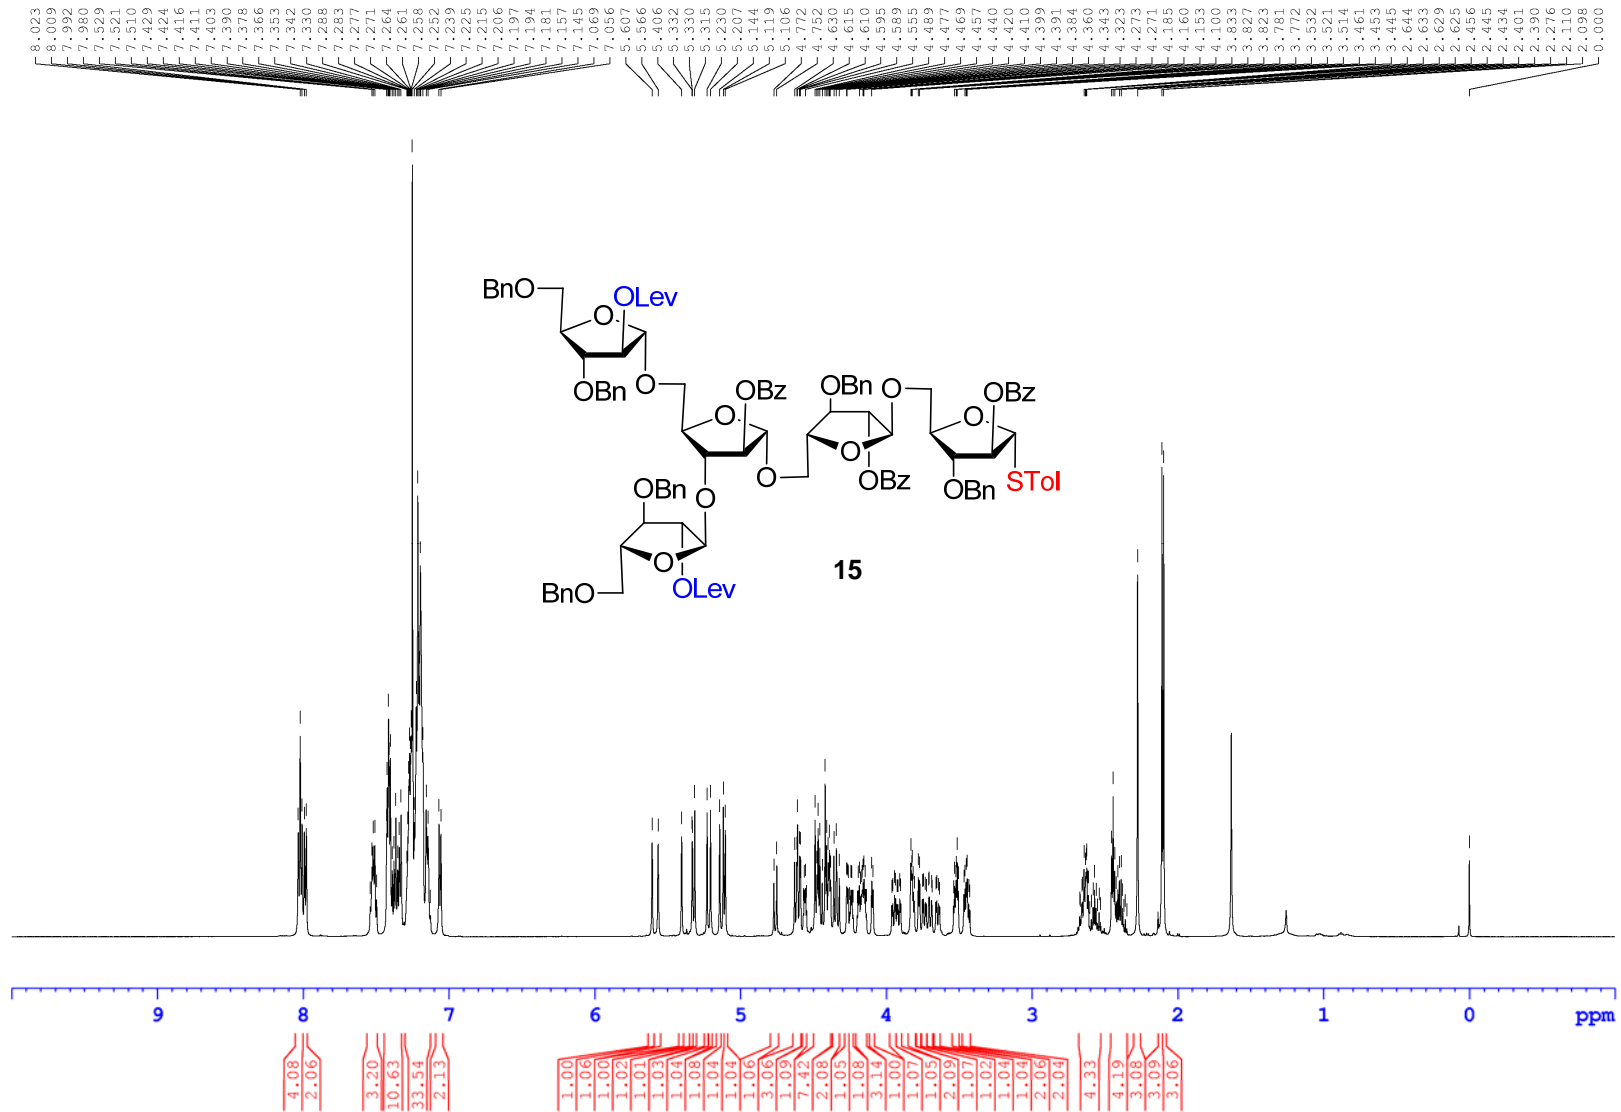

Supplementary Figure 96. <sup>1</sup>H NMR spectrum of compound 15



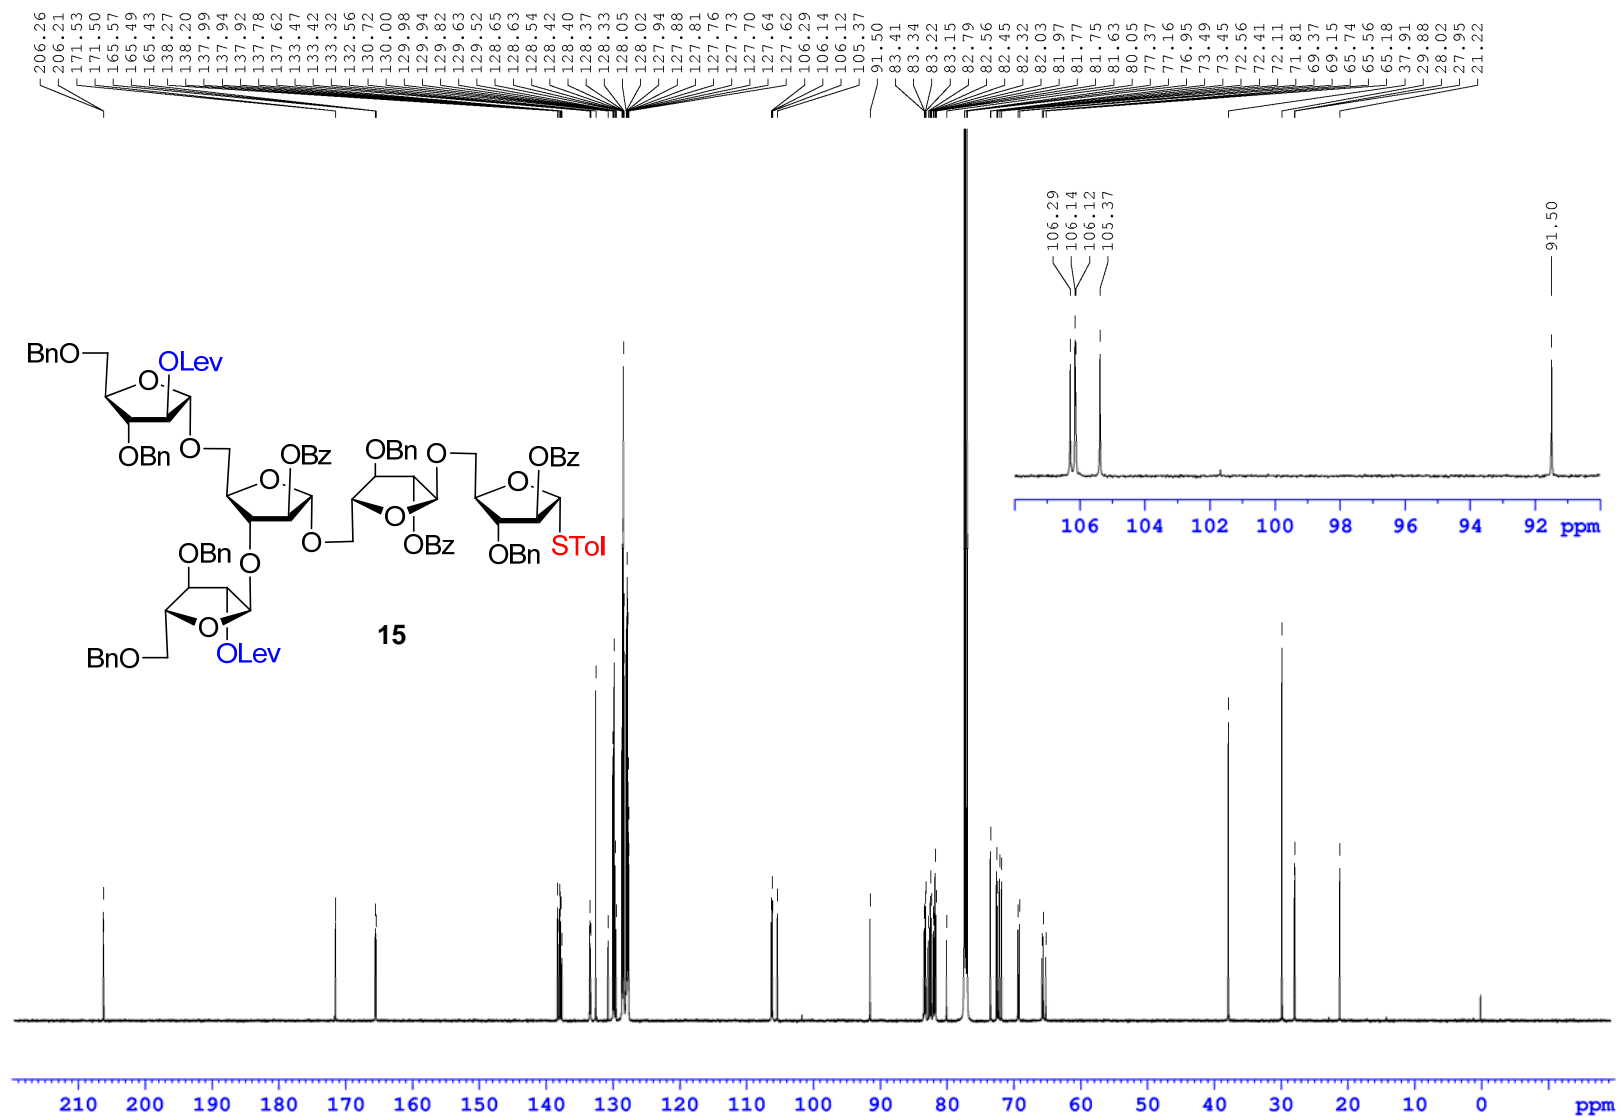

Supplementary Figure 97.  $^{13}\text{C}$  NMR spectrum of compound 15

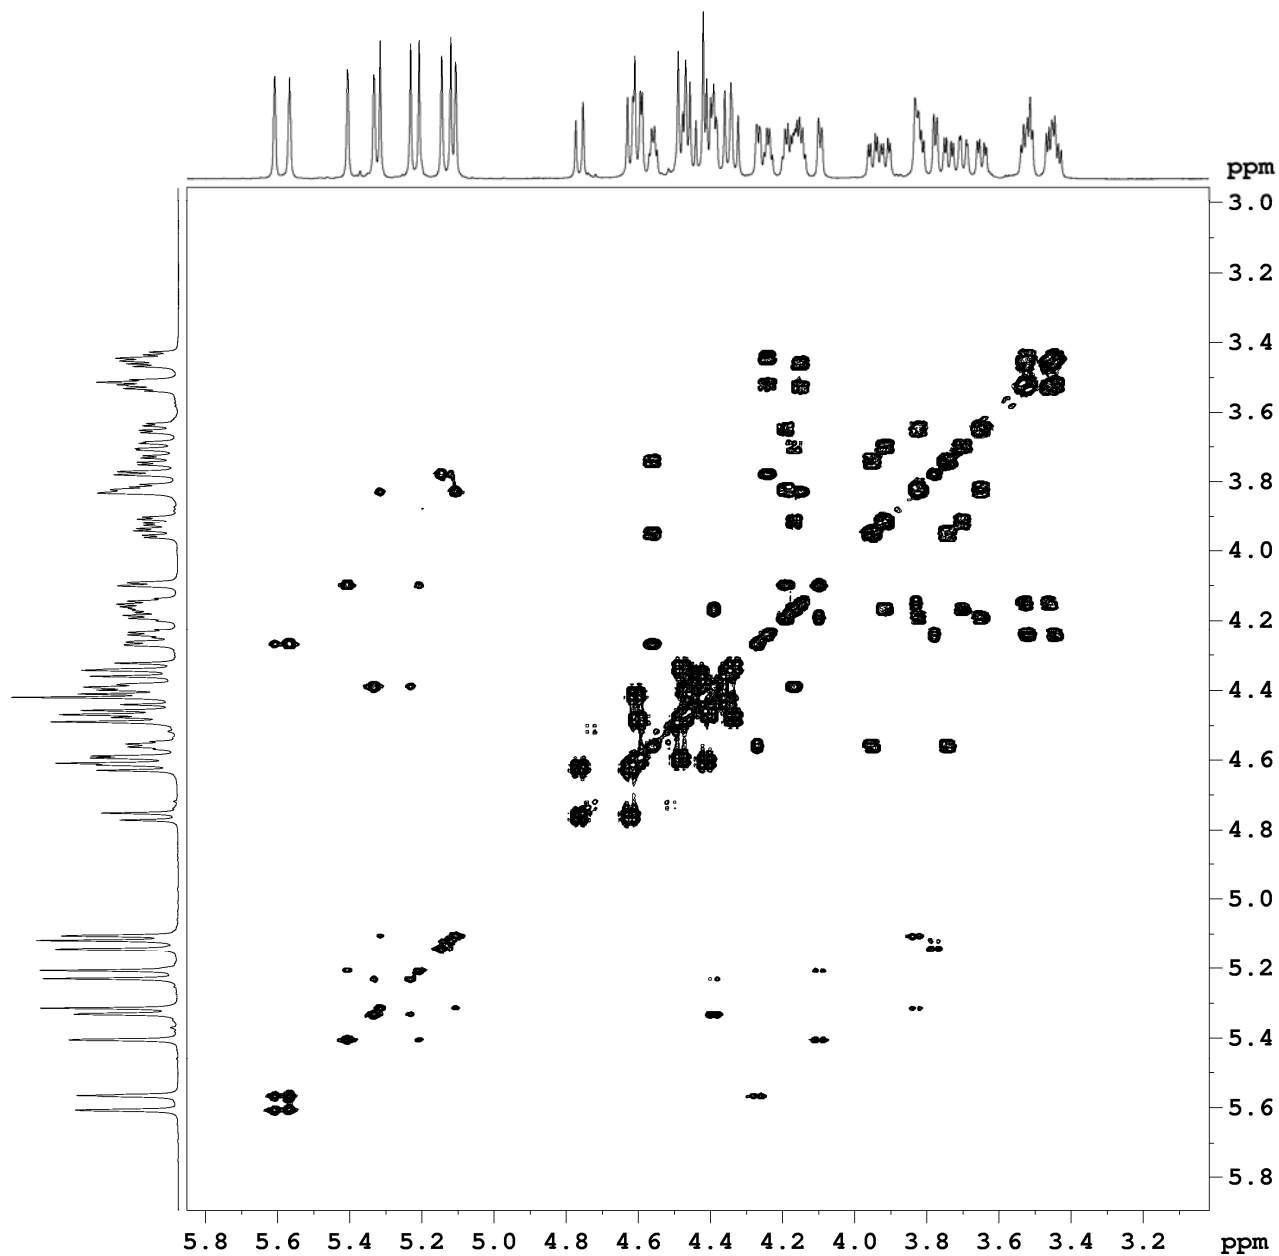

NAME WY-0401  
EXPNO 3  
PROCNO 1  
Date\_ 20151020  
Time 3.27  
INSTRUM spect  
PROBHD 5 mm CPTCI 1H-  
PULPROG cosygpmfzf  
TD 2048  
SOLVENT CDC13  
NS 4  
DS 8  
SWH 6157.635 Hz  
FIDRES 3.006658 Hz  
AQ 0.1663476 sec  
RG 203  
DW 81.200 usec  
DE 10.00 usec  
TE 300.4 K  
D0 0.00000300 sec  
D1 2.00000000 sec  
D13 0.00000400 sec  
D16 0.00020000 sec  
IN0 0.00016240 sec

===== CHANNEL f1 =====  
NUC1 1H  
P1 12.00 usec  
ND0 1  
TD 1024  
SFO1 600.1325 MHz  
FIDRES 6.013292 Hz  
SW 10.260 ppm  
FnMODE QF  
SI 2048  
SF 600.1300209 MHz  
WDW SINE  
SSB 0  
LB 0.00 Hz  
GB 0  
PC 1.40  
SI 2048  
MC2 QF  
SF 600.1300200 MHz  
WDW SINE  
SSB 0  
LB 0.00 Hz  
GB 0

Supplementary Figure 98. COSY NMR spectrum of compound 15

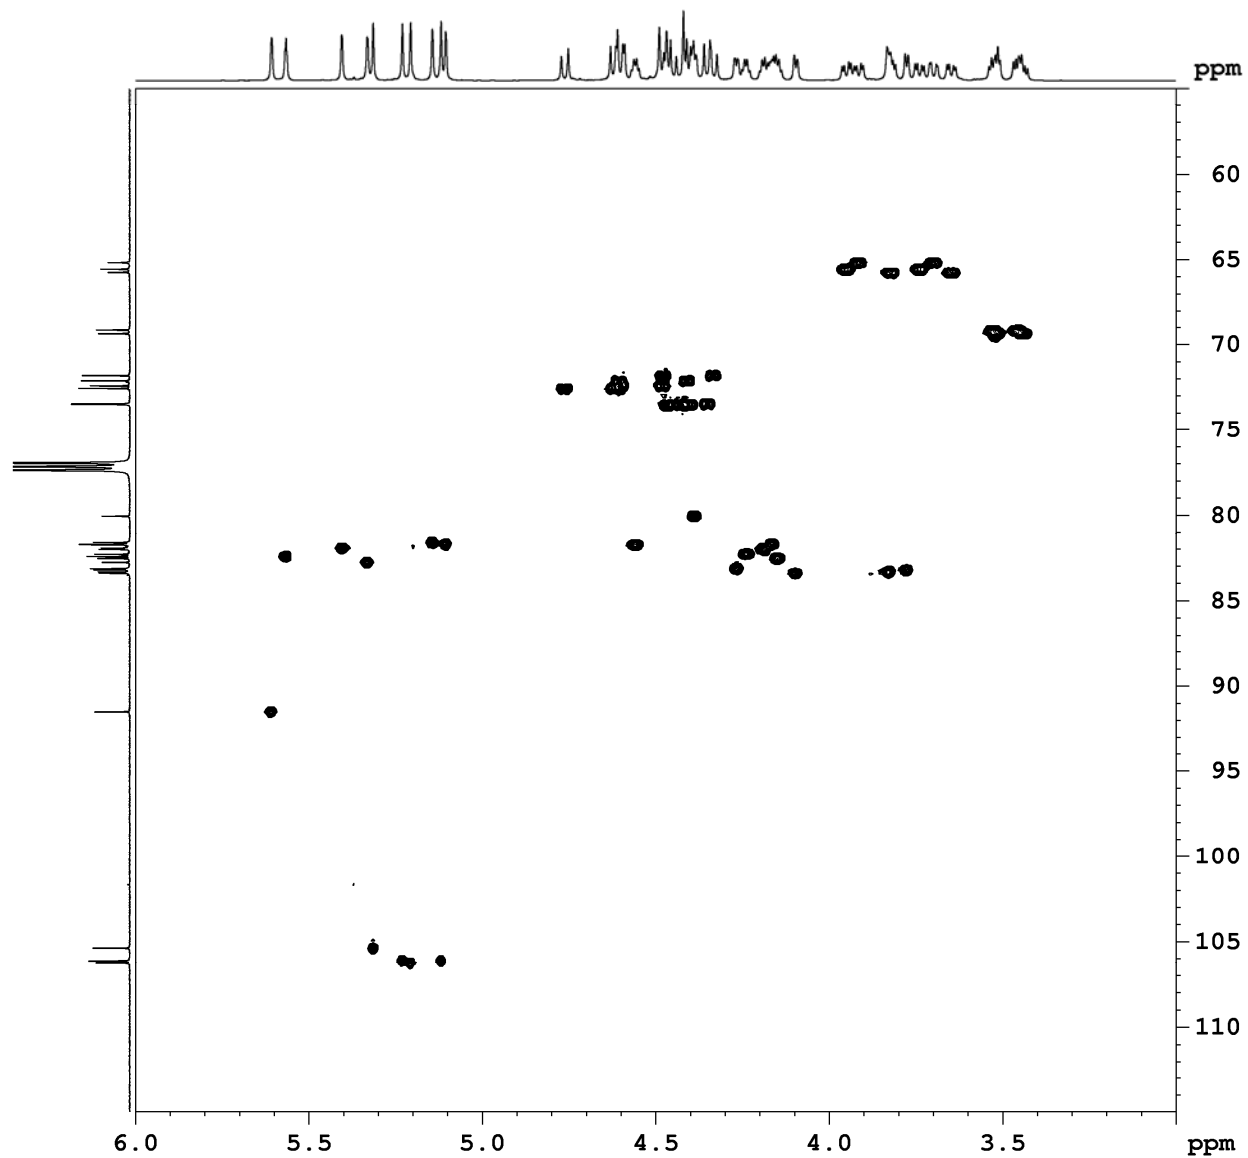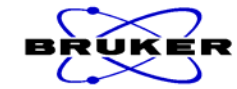

```

NAME          WY-0401
EXPNO         4
PROCNO        1
Date_         20151020
Time          10.18
INSTRUM       spect
PROBHD        5 mm CPTCI 1H-
PULPROG       hsqcetgp
TD            2048
SOLVENT       CDC13
NS            16
DS            16
SWH           6157.635 Hz
FIDRES        3.006658 Hz
AQ            0.1663476 sec
RG            203
DW            81.200 usec
DE            10.00 usec
TE            300.4 K
CNST2         145.0000000
D0            0.00000300 sec
D1            1.50000000 sec
D4            0.00172414 sec
D11           0.03000000 sec
D13           0.00000400 sec
D16           0.00020000 sec
INO           0.00002000 sec
ZGPTNS

```

```

===== CHANNEL f1 =====
NUC1          1H
P1            12.00 usec
P2            24.00 usec
P28           0.00 usec
ND0           2
TD            512
SF01         150.9141 MHz
FIDRES        48.822838 Hz
SW            165.639 ppm
FnMODE        Echo-Antiecho
SI            2048
SF            600.1300202 MHz
WDW           QSINE
SSB           2
LB            0.00 Hz
GB            0
PC            1.40
SI            1024
MC2           echo-antiecho
SF            150.9027824 MHz
WDW           QSINE
SSB           2
LB            0.00 Hz
GB            0

```

Supplementary Figure 99. HSQC NMR spectrum of compound 15

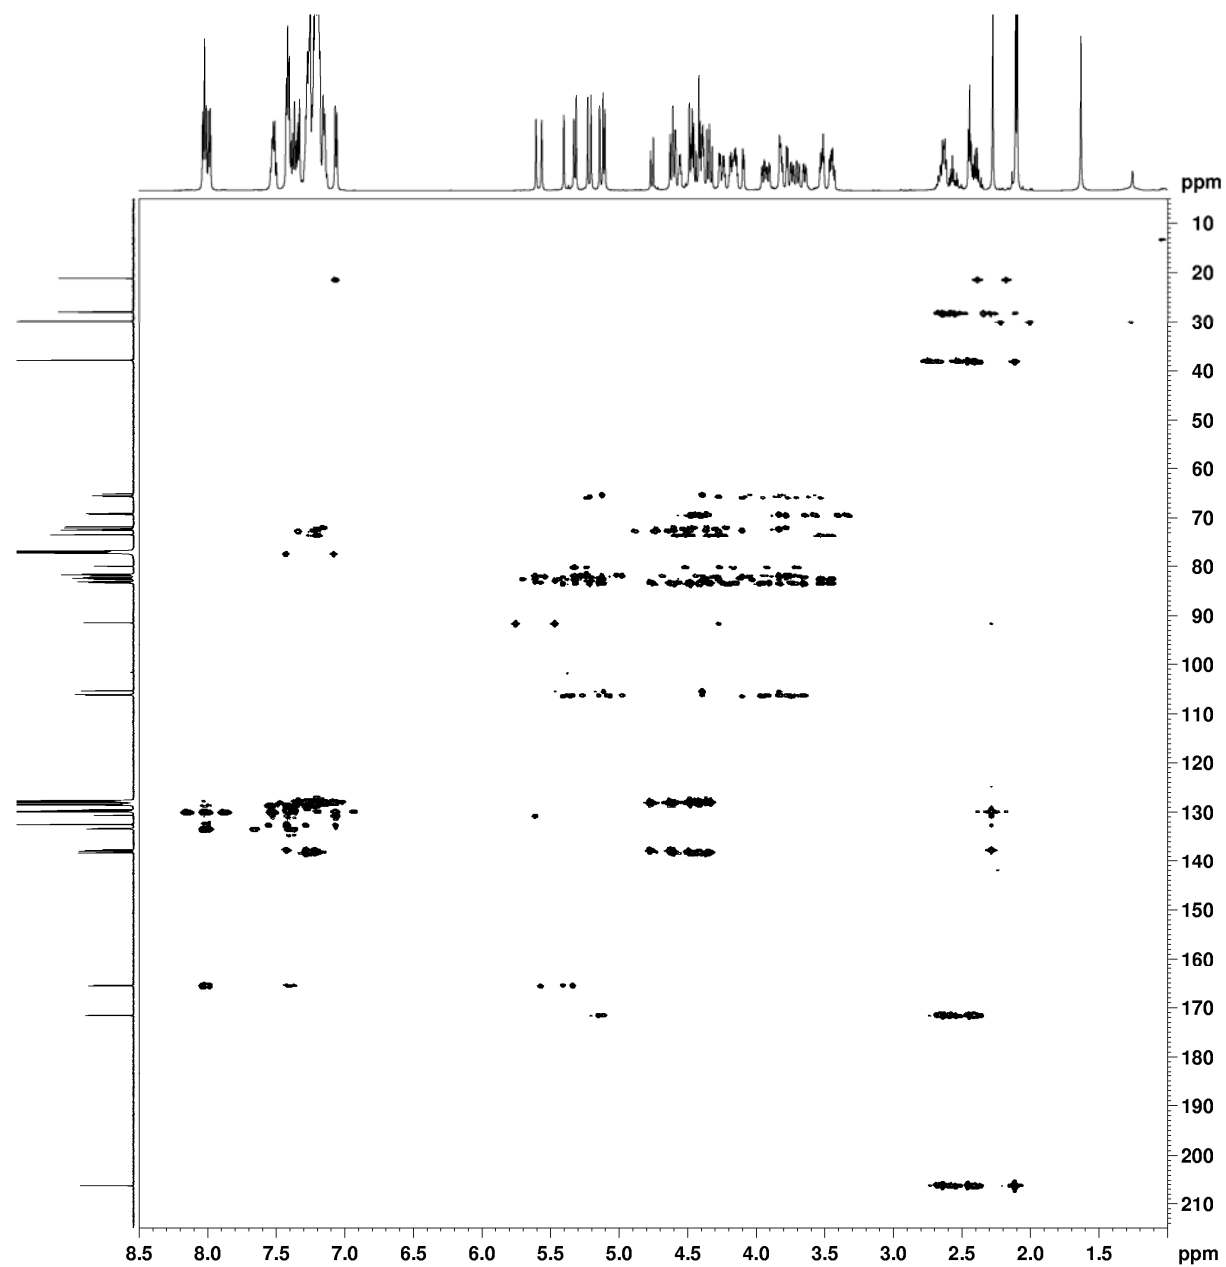

```

NAME          WY-0401
EXPNO         5
PROCNO        1
Date_         20151019
Time          17.37
INSTRUM       spect
PROBHD        5 mm CPTCI 1H-
PULPROG       hmbcgpndqf
TD            2048
SOLVENT       CDCl3
NS            12
DS            16
SWH           6157.635 Hz
FIDRES        3.006658 Hz
AQ            0.1663476 sec
RG            203
DW            81.200 usec
DE            10.00 usec
TE            300.4 K
CNST13        8.0000000
D0            0.0000300 sec
D1            1.5000000 sec
D6            0.0625000 sec
D16           0.0022000 sec
IN0           0.00001490 sec

```

```

===== CHANNEL f1 =====
NUC1          1H
P1            12.00 usec
P2            24.00 usec
ND0           2
TD            1024
SFO1          150.9179 MHz
FIDRES        32.732533 Hz
SW            222.095 ppm
FhMODE        QF
SI            2048
SF            600.1300196 MHz
WDW           SINE
SSB           0
LB            0.00 Hz
GB            0
PC            1.40
SI            1024
MC2           QF
SF            150.9027761 MHz
WDW           STNF
SSB           0
LB            0.00 Hz
GB            0

```

Supplementary Figure 100. HMBC NMR spectrum of compound 15

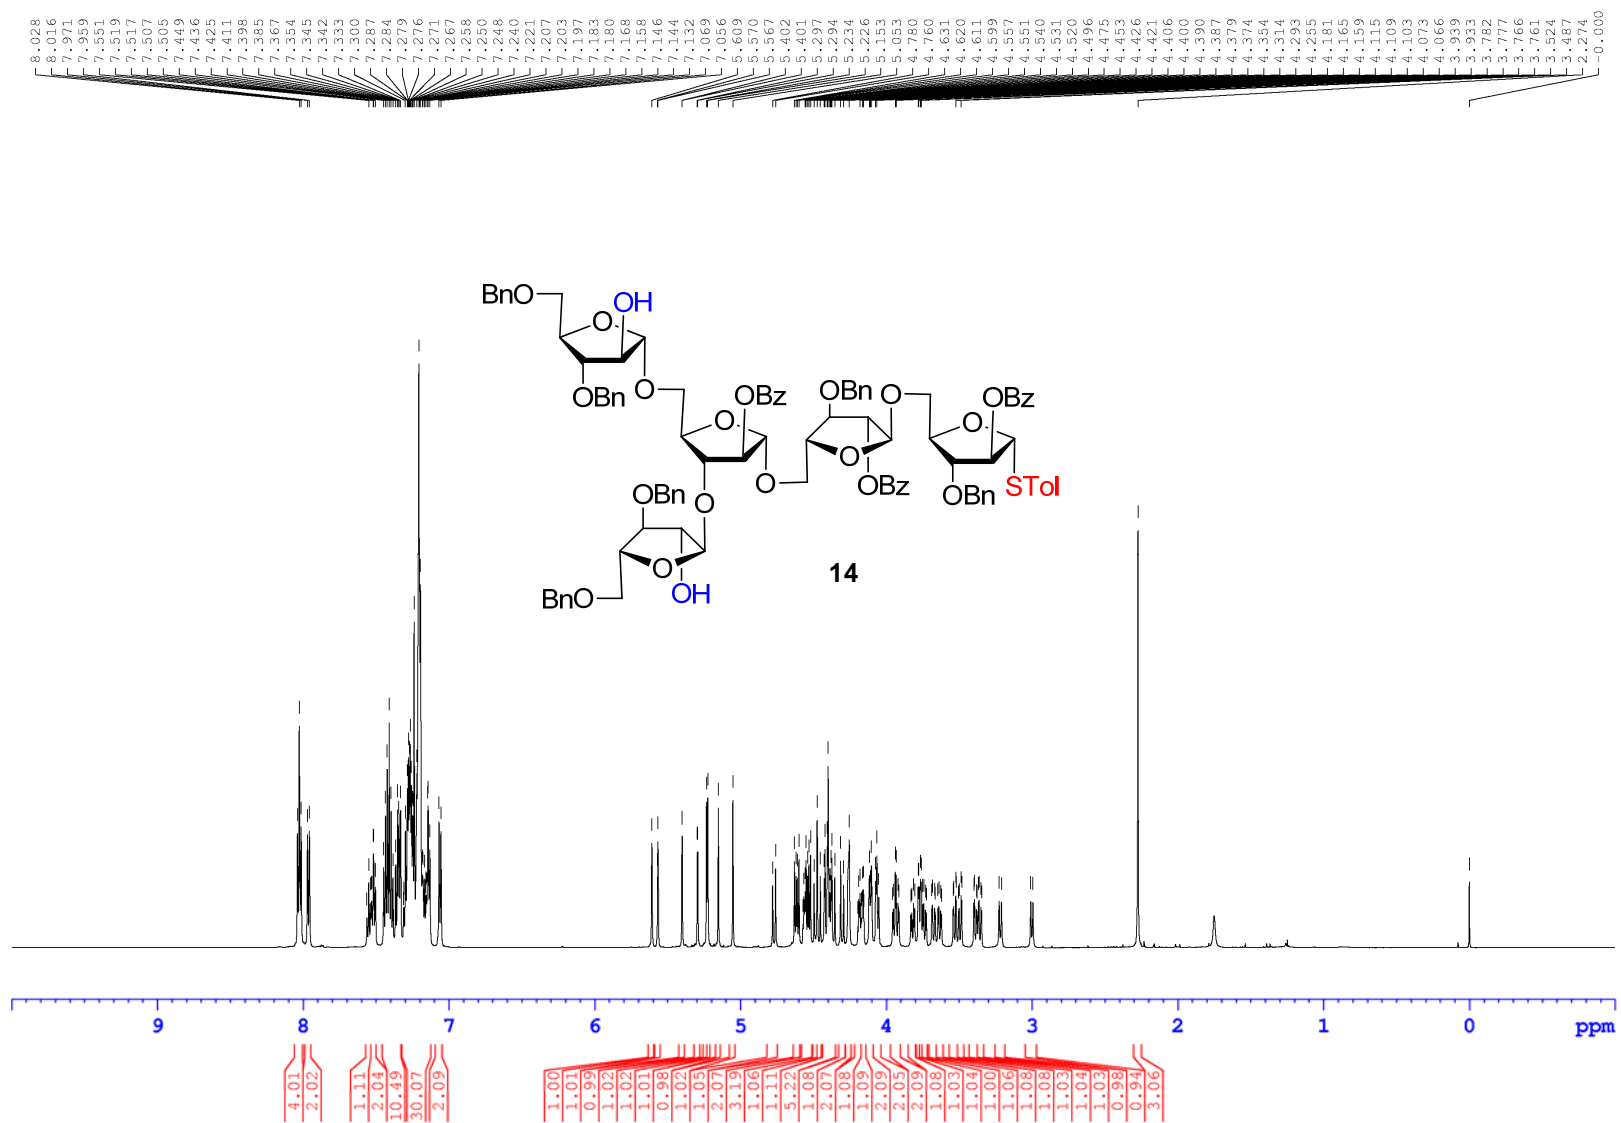

Supplementary Figure 101. <sup>1</sup>H NMR spectrum of compound 14









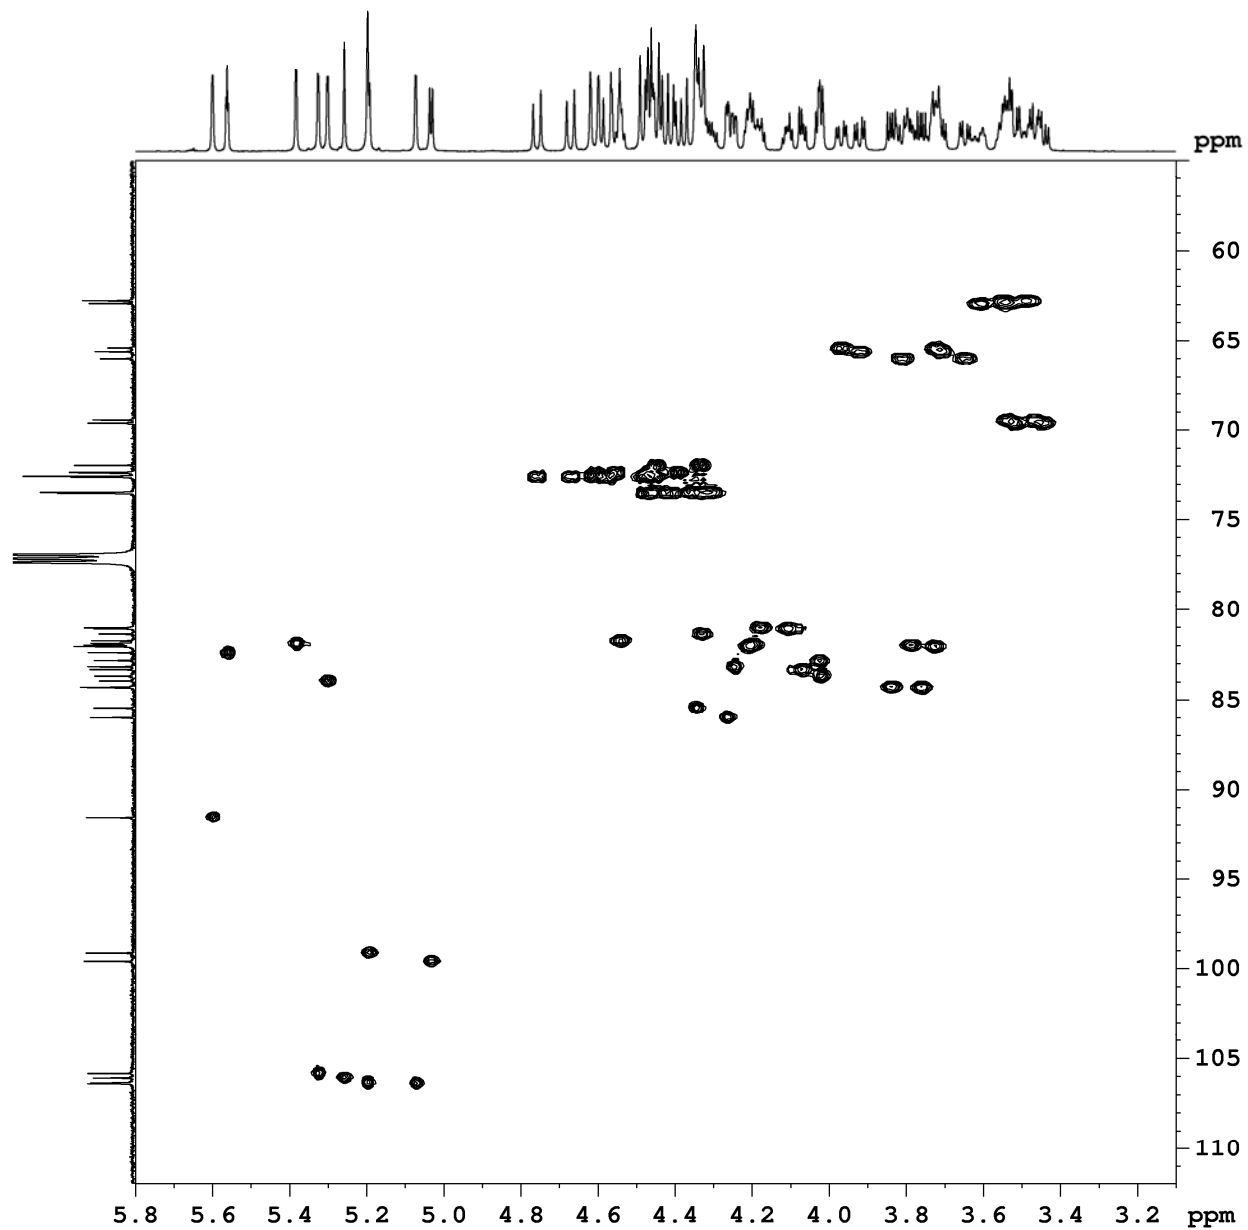

```

NAME          WY-0403
EXPNO         4
PROCNO        1
Date_         20151211
Time          17.56
INSTRUM       spect
PROBHD        5 mm CPTCI 1H-
PULPROG       hsqcetgp
TD            2048
SOLVENT       CDC13
NS            8
DS            16
SWH           5980.861 Hz
FIDRES        2.920342 Hz
AQ            0.1712628 sec
RG            203
DW            83.600 usec
DE            10.00 usec
TE            300.4 K
CNST2         145.0000000
D0            0.00000300 sec
D1            1.50000000 sec
D4            0.00172414 sec
D11           0.03000000 sec
D13           0.00000400 sec
D16           0.00020000 sec
INO           0.00002000 sec
ZGPTNS

```

```

===== CHANNEL f1 =====
NUC1          1H
P1            12.00 usec
P2            24.00 usec
P28           0.00 usec
ND0           2
TD            512
SF01          150.9141 MHz
FIDRES        48.822838 Hz
SW            165.639 ppm
FnMODE        Echo-Antiecho
SI            1024
SF            600.1300194 MHz
WDW           QSINE
SSB           2
LB            0.00 Hz
GB            0
PC            1.40
SI            1024
MC2           echo-antiecho
SF            150.9027815 MHz
WDW           QSINE
SSB           2
LB            0.00 Hz
GB            0

```

Supplementary Figure 105. HSQC NMR spectrum of compound 31

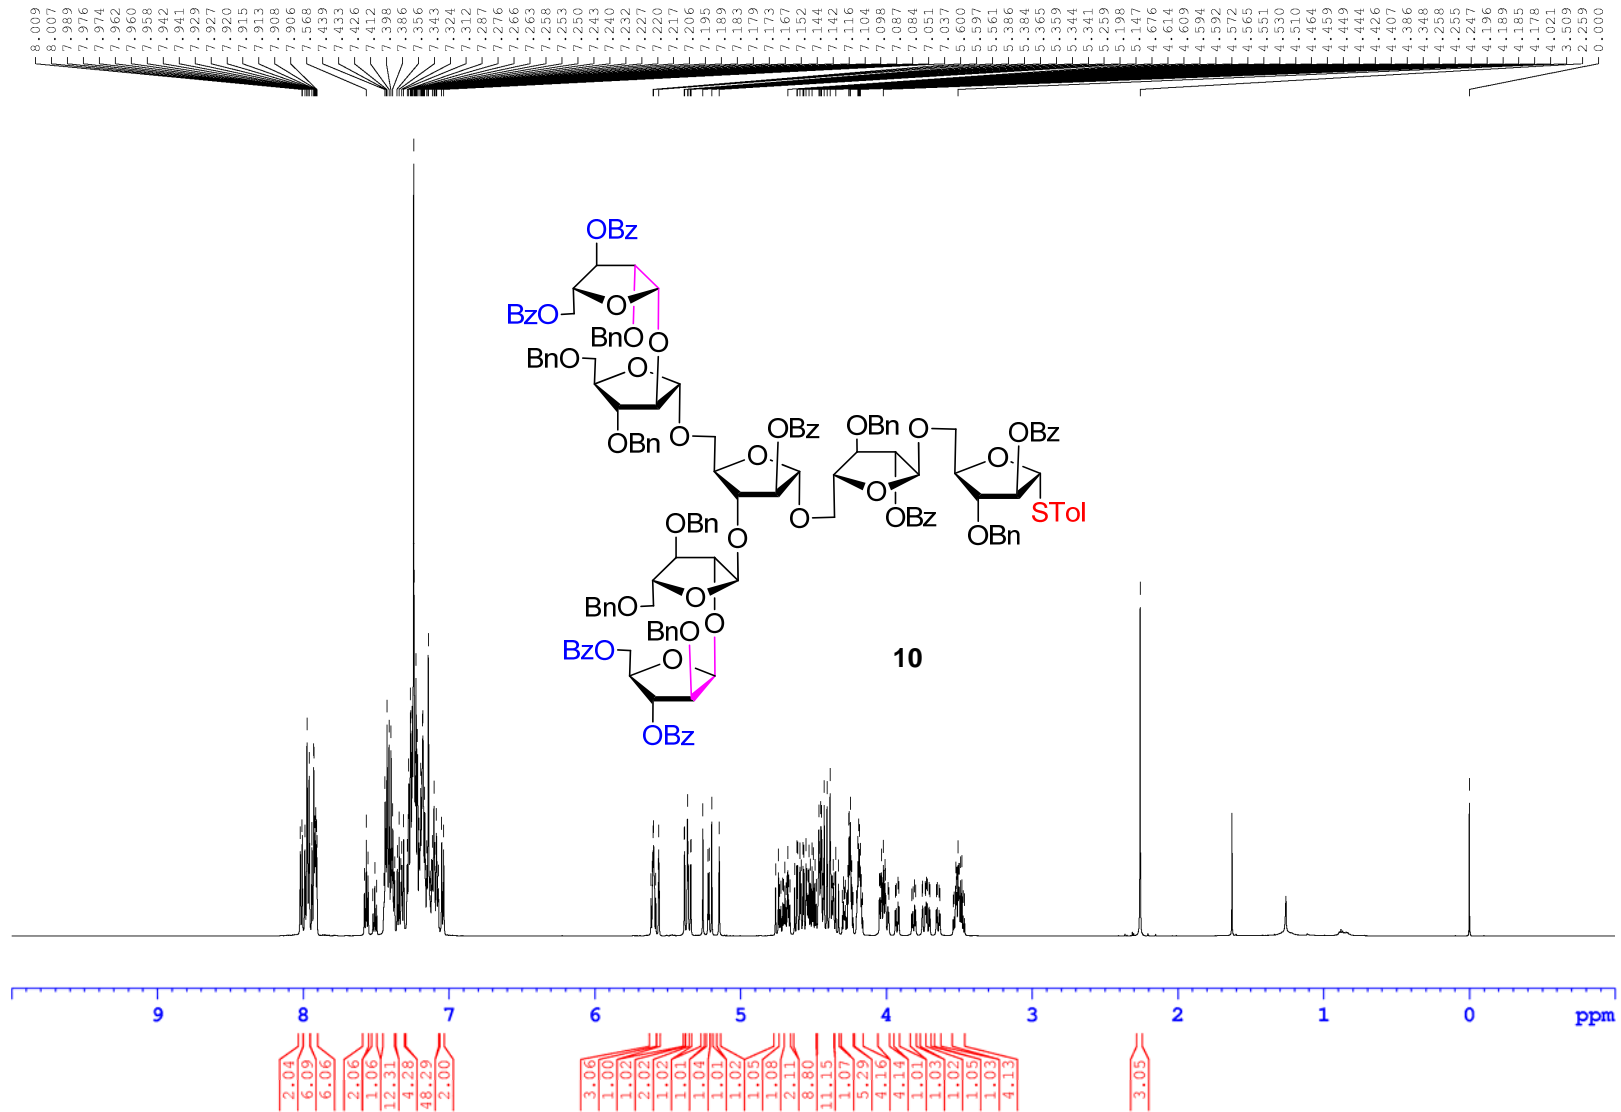

Supplementary Figure 106.  $^1\text{H}$  NMR spectrum of compound 10



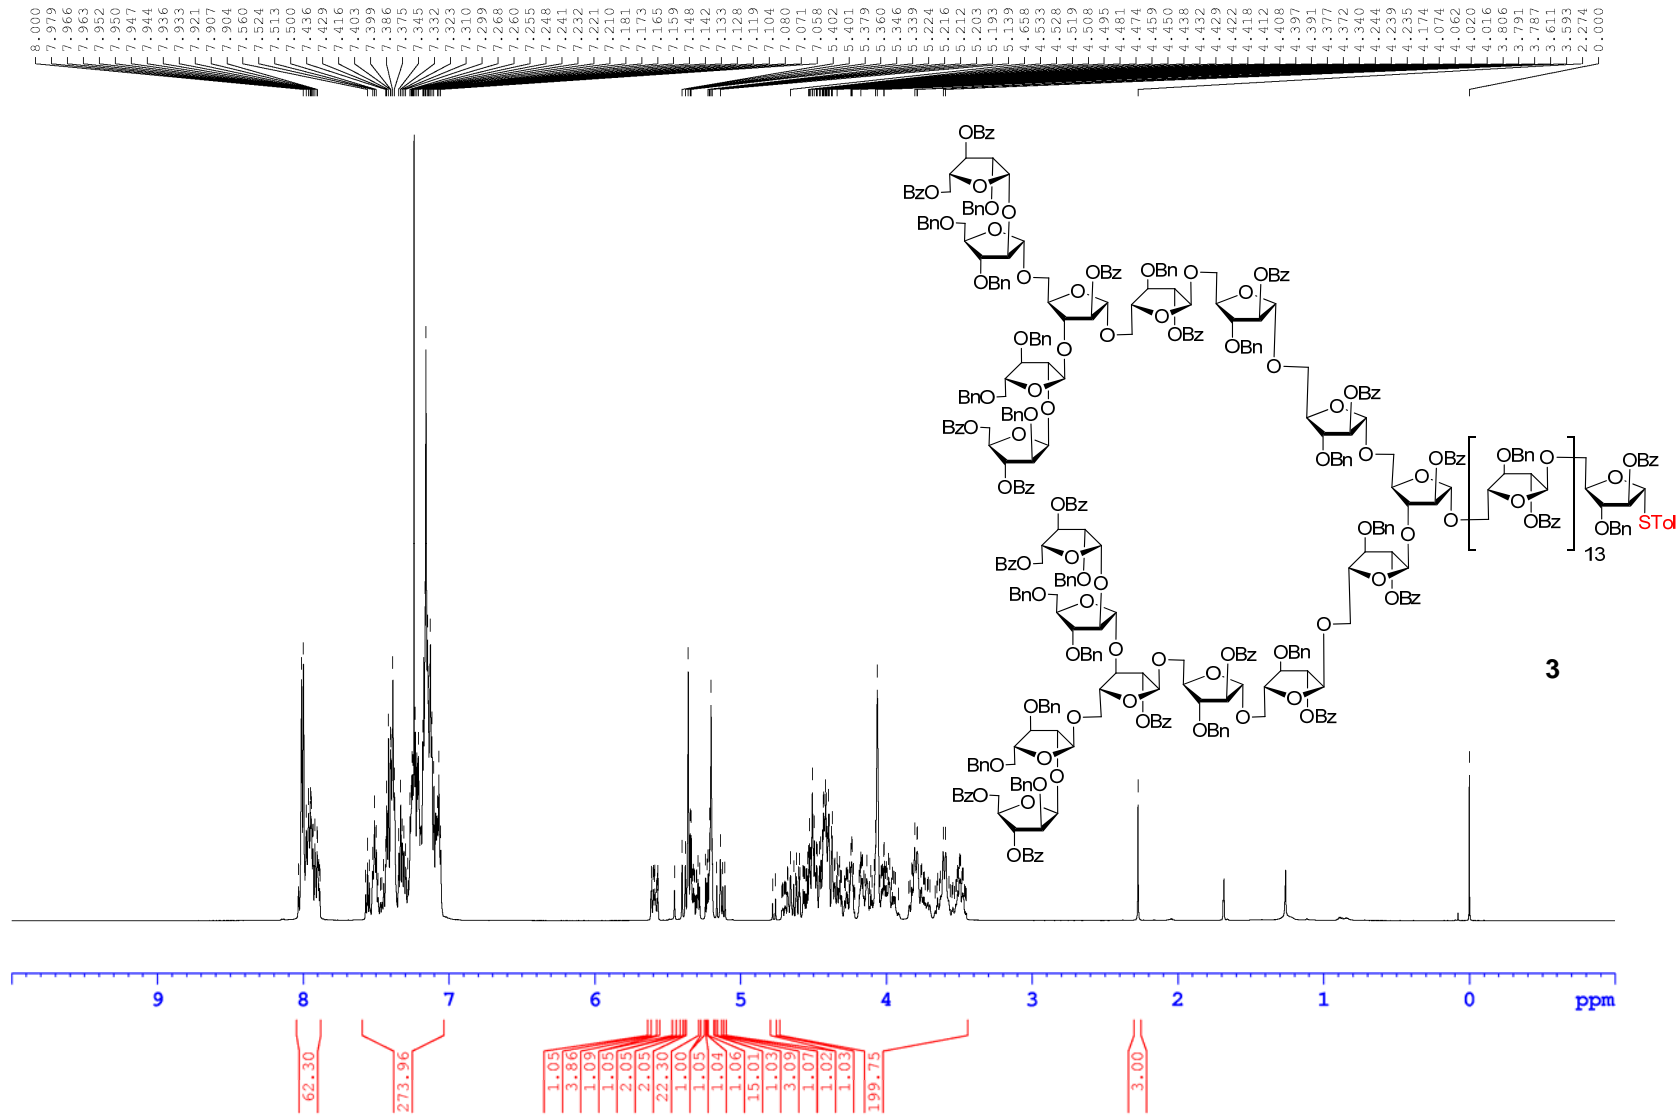

Supplementary Figure 108. <sup>1</sup>H NMR spectrum of compound 3



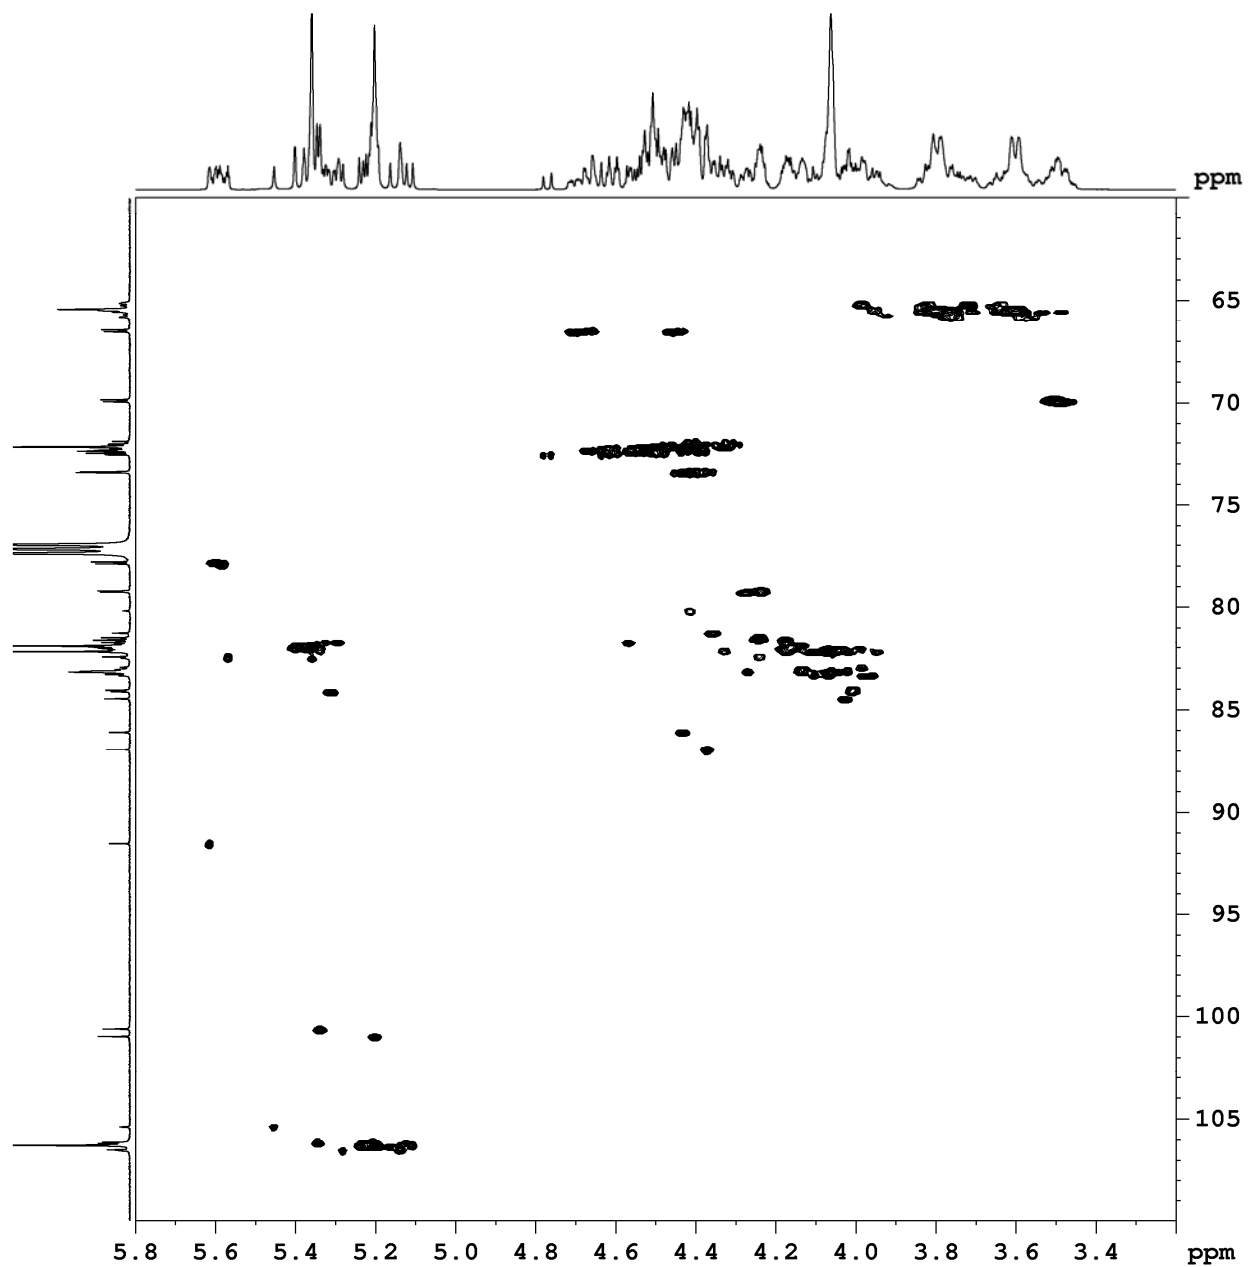

```

NAME          WY-0412
EXPNO         4
PROCNO        1
Date_         20160106
Time          15.39
INSTRUM       spect
PROBHD        5 mm CPTCI 1H-
PULPROG       hsqcetgpsi2
TD            2048
SOLVENT       CDCl3
NS            8
DS            16
SWH           6009.615 Hz
FIDRES        2.934382 Hz
AQ            0.1704436 sec
RG            203
DW            83.200 usec
DE            10.00 usec
TE            300.4 K
CNST2         145.0000000
D0            0.00000300 sec
D1            1.50000000 sec
D4            0.00172414 sec
D11           0.03000000 sec
D13           0.00000400 sec
D16           0.00020000 sec
D24           0.00086207 sec
IN0           0.00002000 sec
ZGPTNS

```

```

===== CHANNEL f1 =====
NUC1          1H
P1            12.00 usec
P2            24.00 usec
P28           0.00 usec
ND0           2
TD            1024
SF01          150.9141 MHz
FIDRES        24.413012 Hz
SW            165.650 ppm
FnMODE        Echo-Antiecho
SI            2048
SF            600.1300271 MHz
WDW           QSINE
SSB           2
LB            0.00 Hz
GB            0
PC            1.40
SI            1024
MC2           echo-antiecho
SF            150.9027798 MHz
WDW           QSINE
SSB           2
LB            0.00 Hz
GB            0

```

Supplementary Figure 110. HSQC NMR spectrum of compound 3

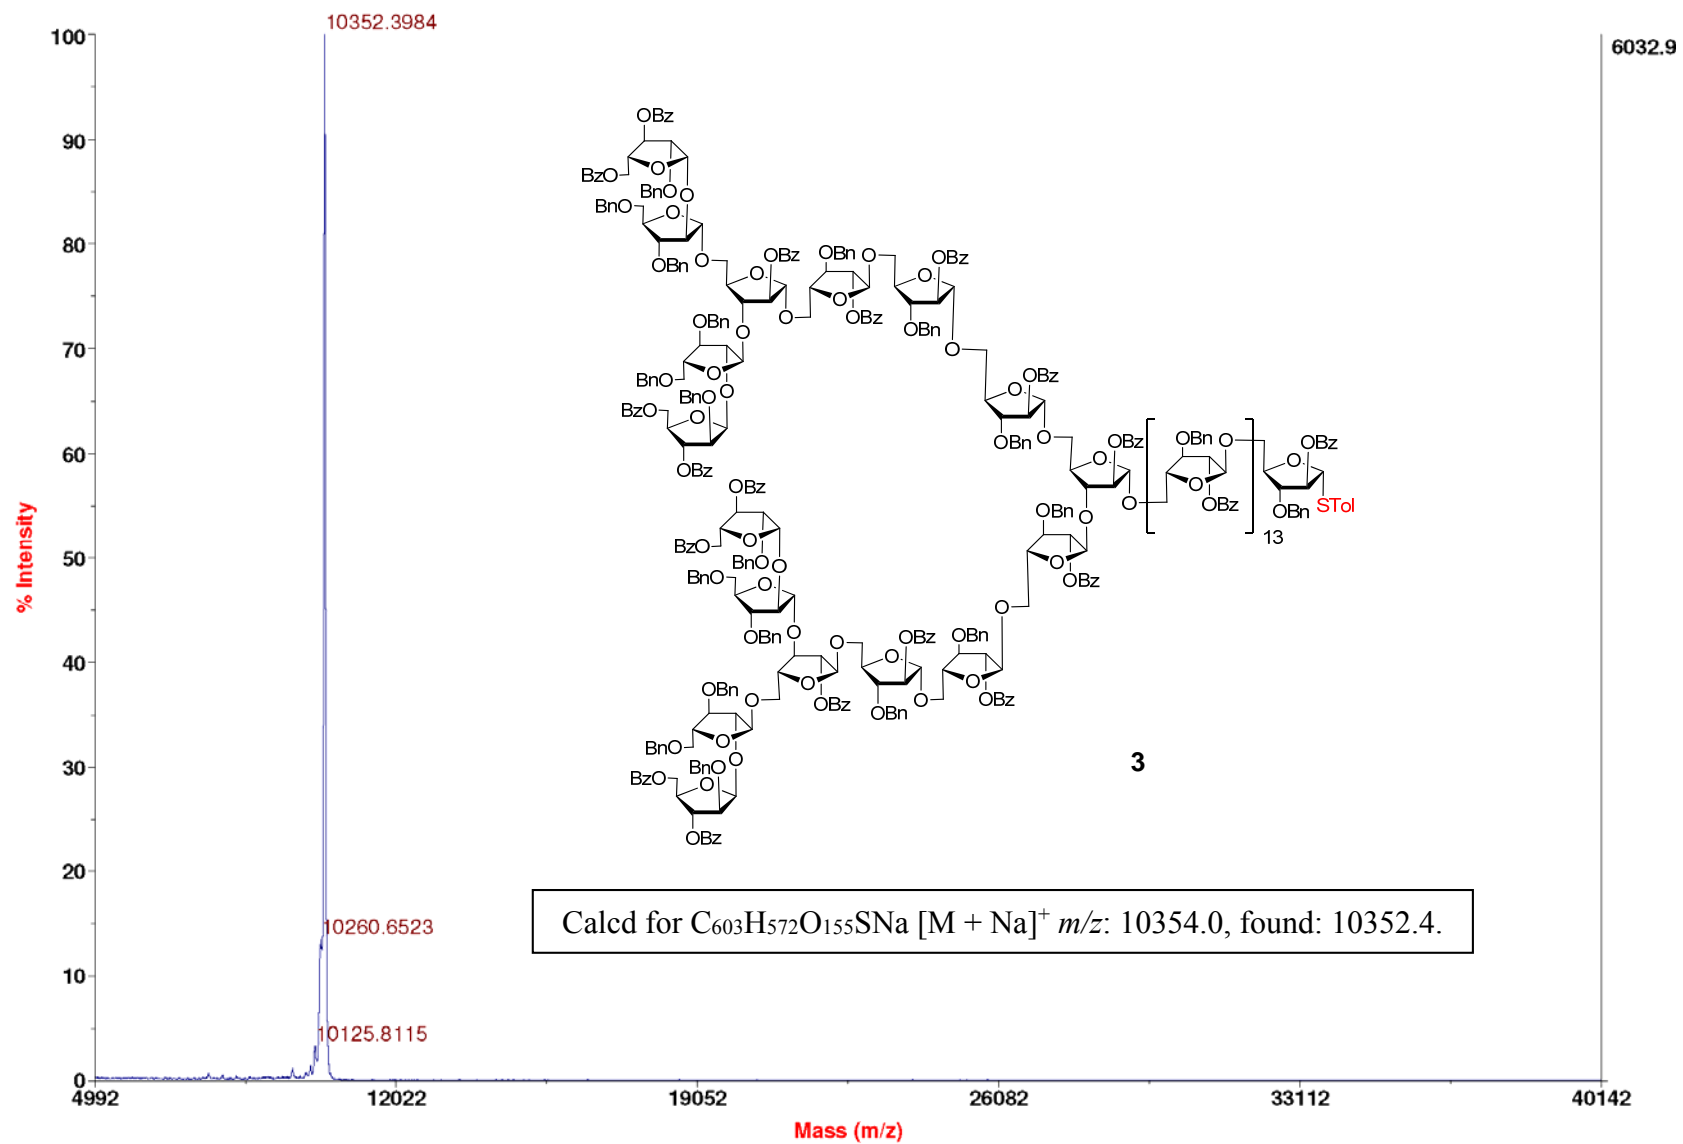

C:\AB SCIEX\TOFTOF Data\ExportT2D\zhong\20160225-2000\D5\_LINEAR.t2d

Printed: 16:03, March 16, 2016

Supplementary Figure 111. MALDI-TOF MS spectrum of compound 3

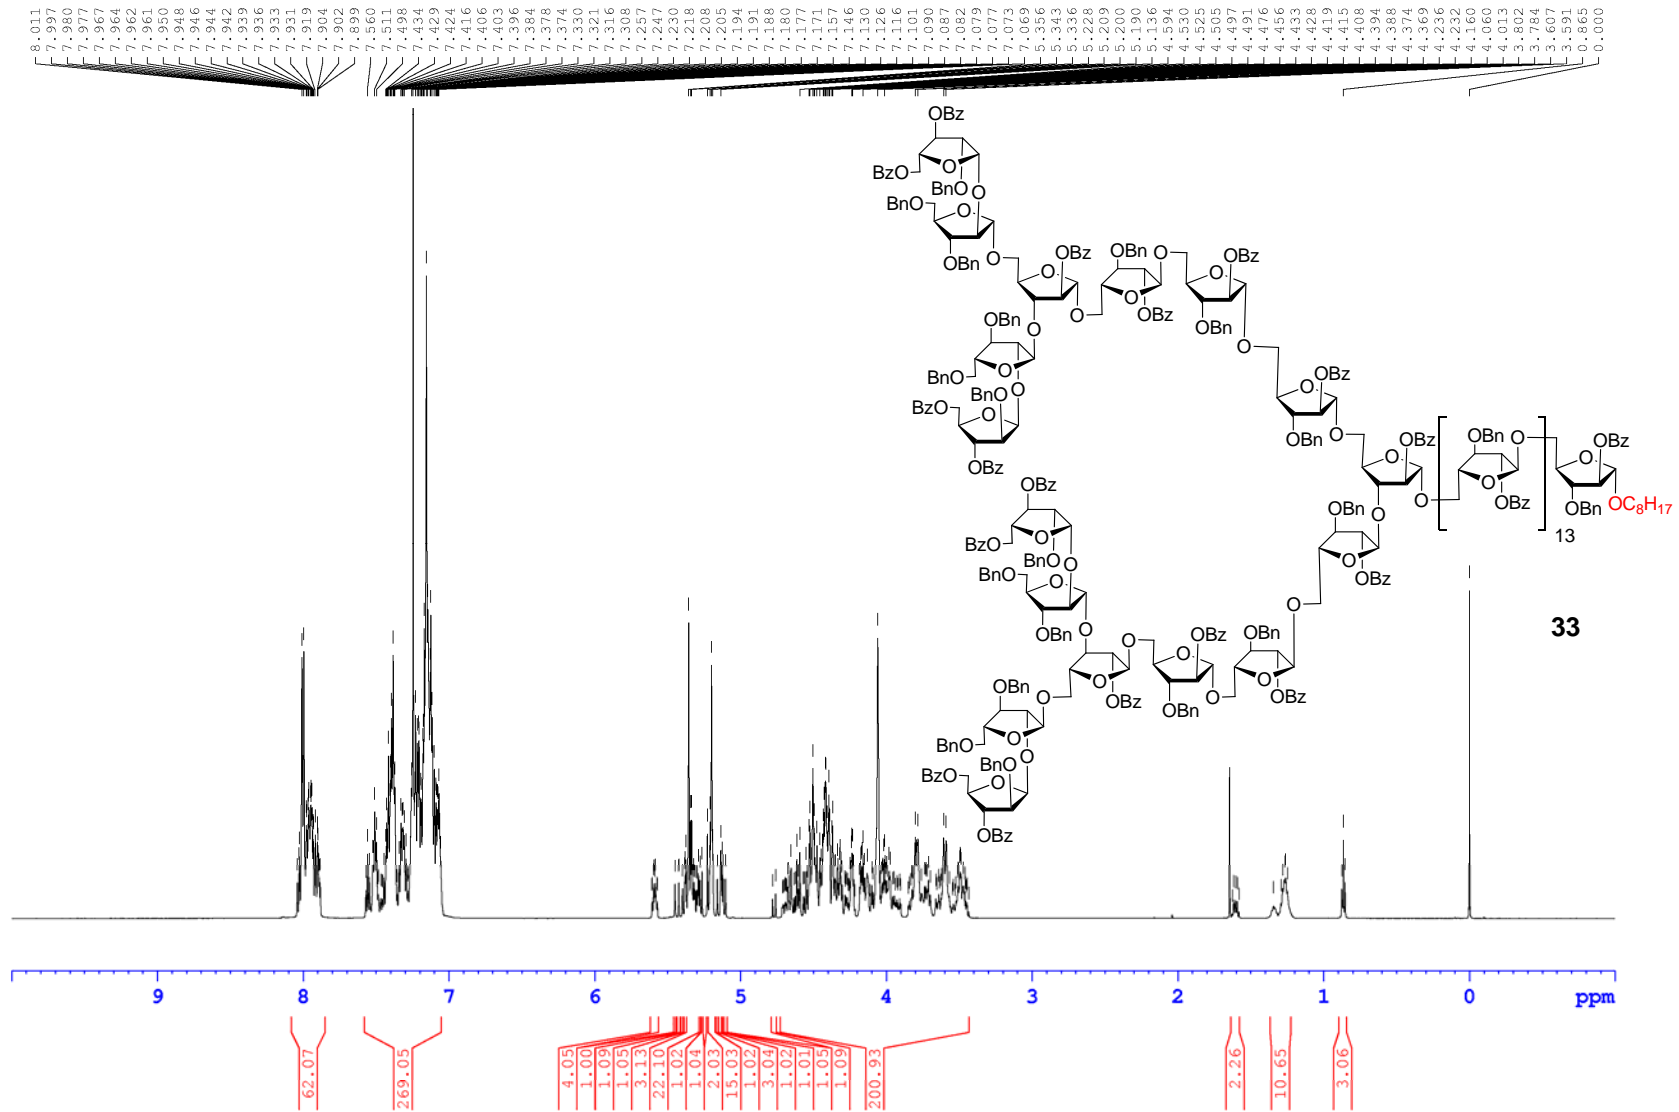

Supplementary Figure 112.  $^1H$  NMR spectrum of compound 33



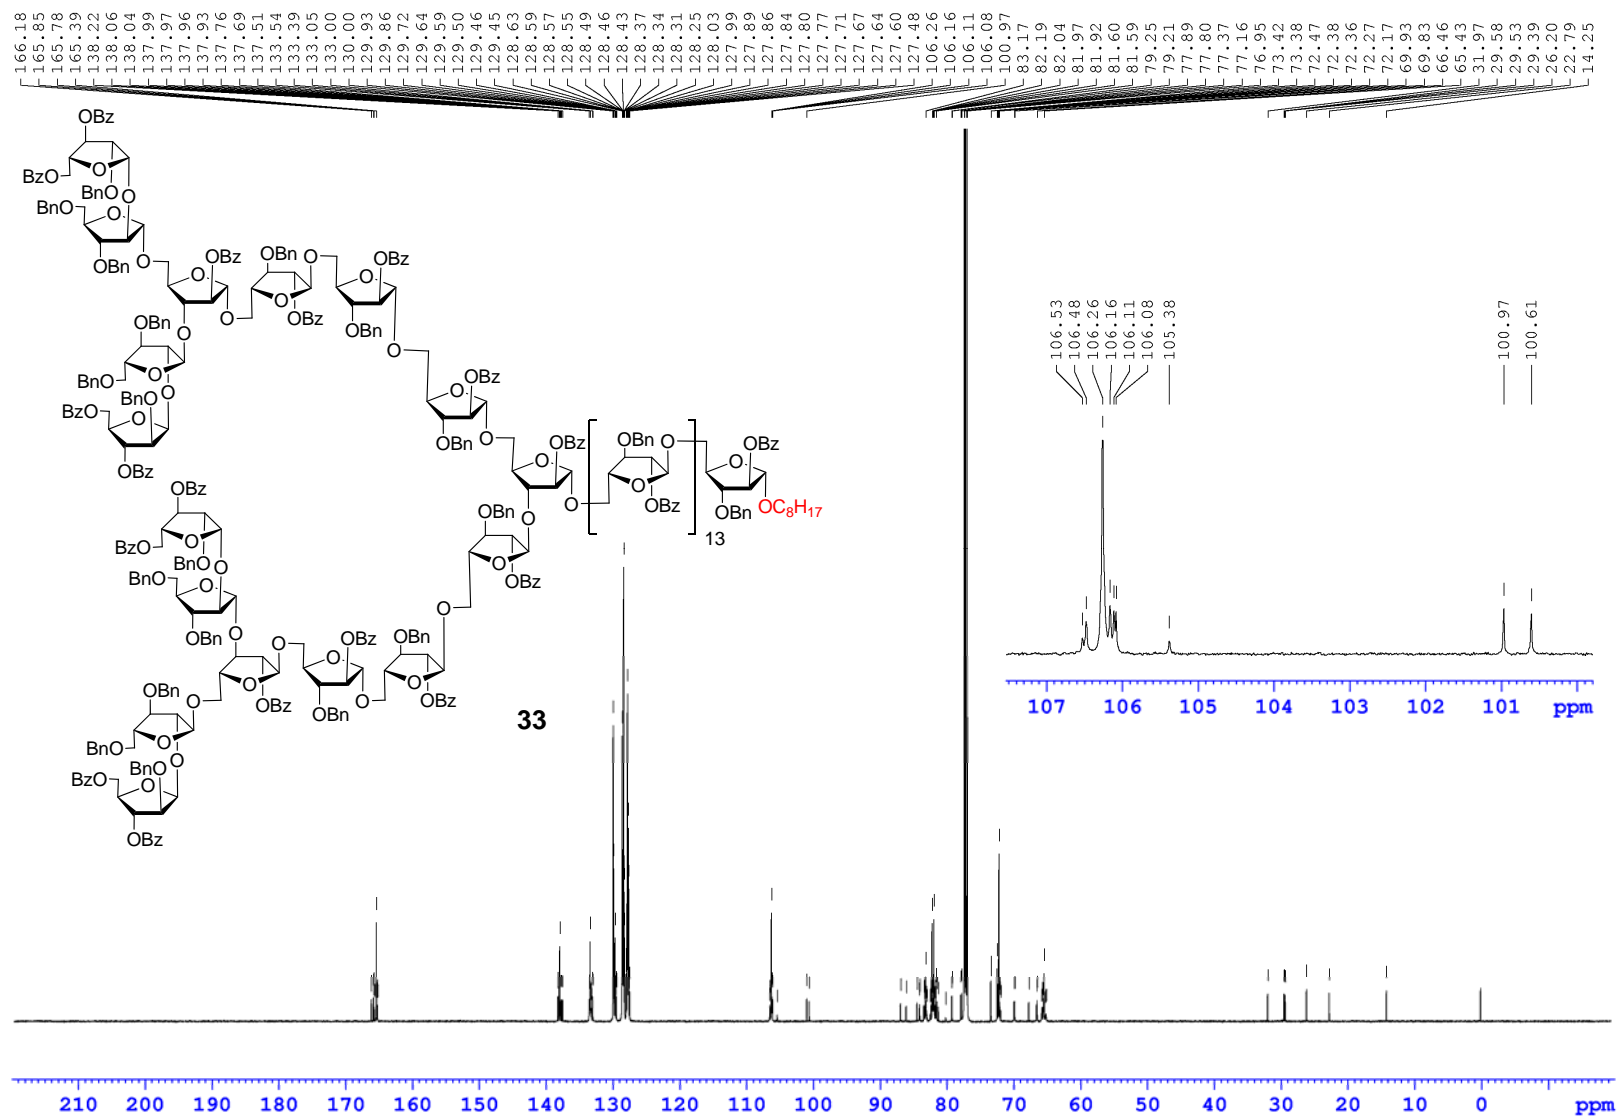

Supplementary Figure 113. <sup>13</sup>C NMR spectrum of compound 33

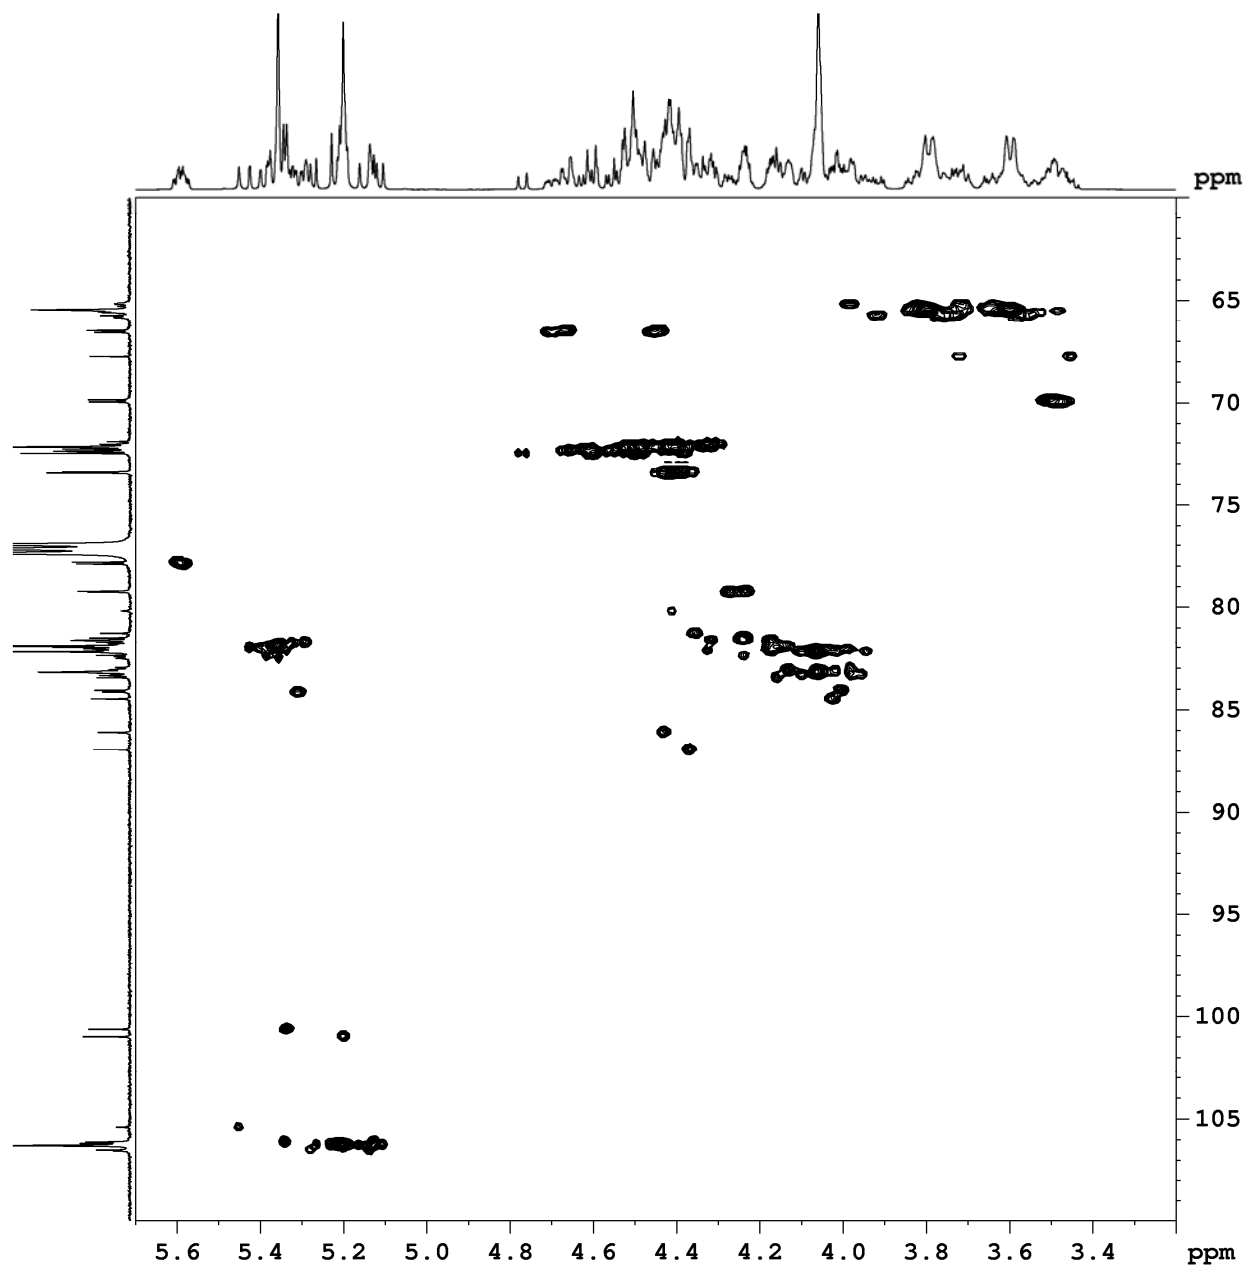

```

NAME          WY-0410
EXPNO         4
PROCNO        1
Date_         20160224
Time          9.43
INSTRUM       spect
PROBHD        5 mm CPTCI 1H-
PULPROG       hsqcetgp
TD            2048
SOLVENT       CDC13
NS            16
DS            16
SWH           6203.474 Hz
FIDRES        3.029040 Hz
AQ            0.1651188 sec
RG            203
DW            80.600 usec
DE            10.00 usec
TE            300.4 K
CNST2         145.0000000
D0            0.00000300 sec
D1            1.50000000 sec
D4            0.00172414 sec
D11           0.03000000 sec
D13           0.00000400 sec
D16           0.00020000 sec
INO           0.00002000 sec
ZGPTNS

```

```

===== CHANNEL f1 =====
NUC1          1H
P1            12.00 usec
P2            24.00 usec
P28           0.00 usec
ND0           2
TD            512
SF01          150.9141 MHz
FIDRES        48.822838 Hz
SW            165.639 ppm
FnMODE        Echo-Antiecho
SI            1024
SF            600.1300211 MHz
WDW           QSINE
SSB           2
LB            0.00 Hz
GB            0
PC            1.40
SI            1024
MC2           echo-antiecho
SF            150.9027843 MHz
WDW           QSINE
SSB           2
LB            0.00 Hz
GB            0

```

Supplementary Figure 114. HSQC NMR spectrum of compound 33

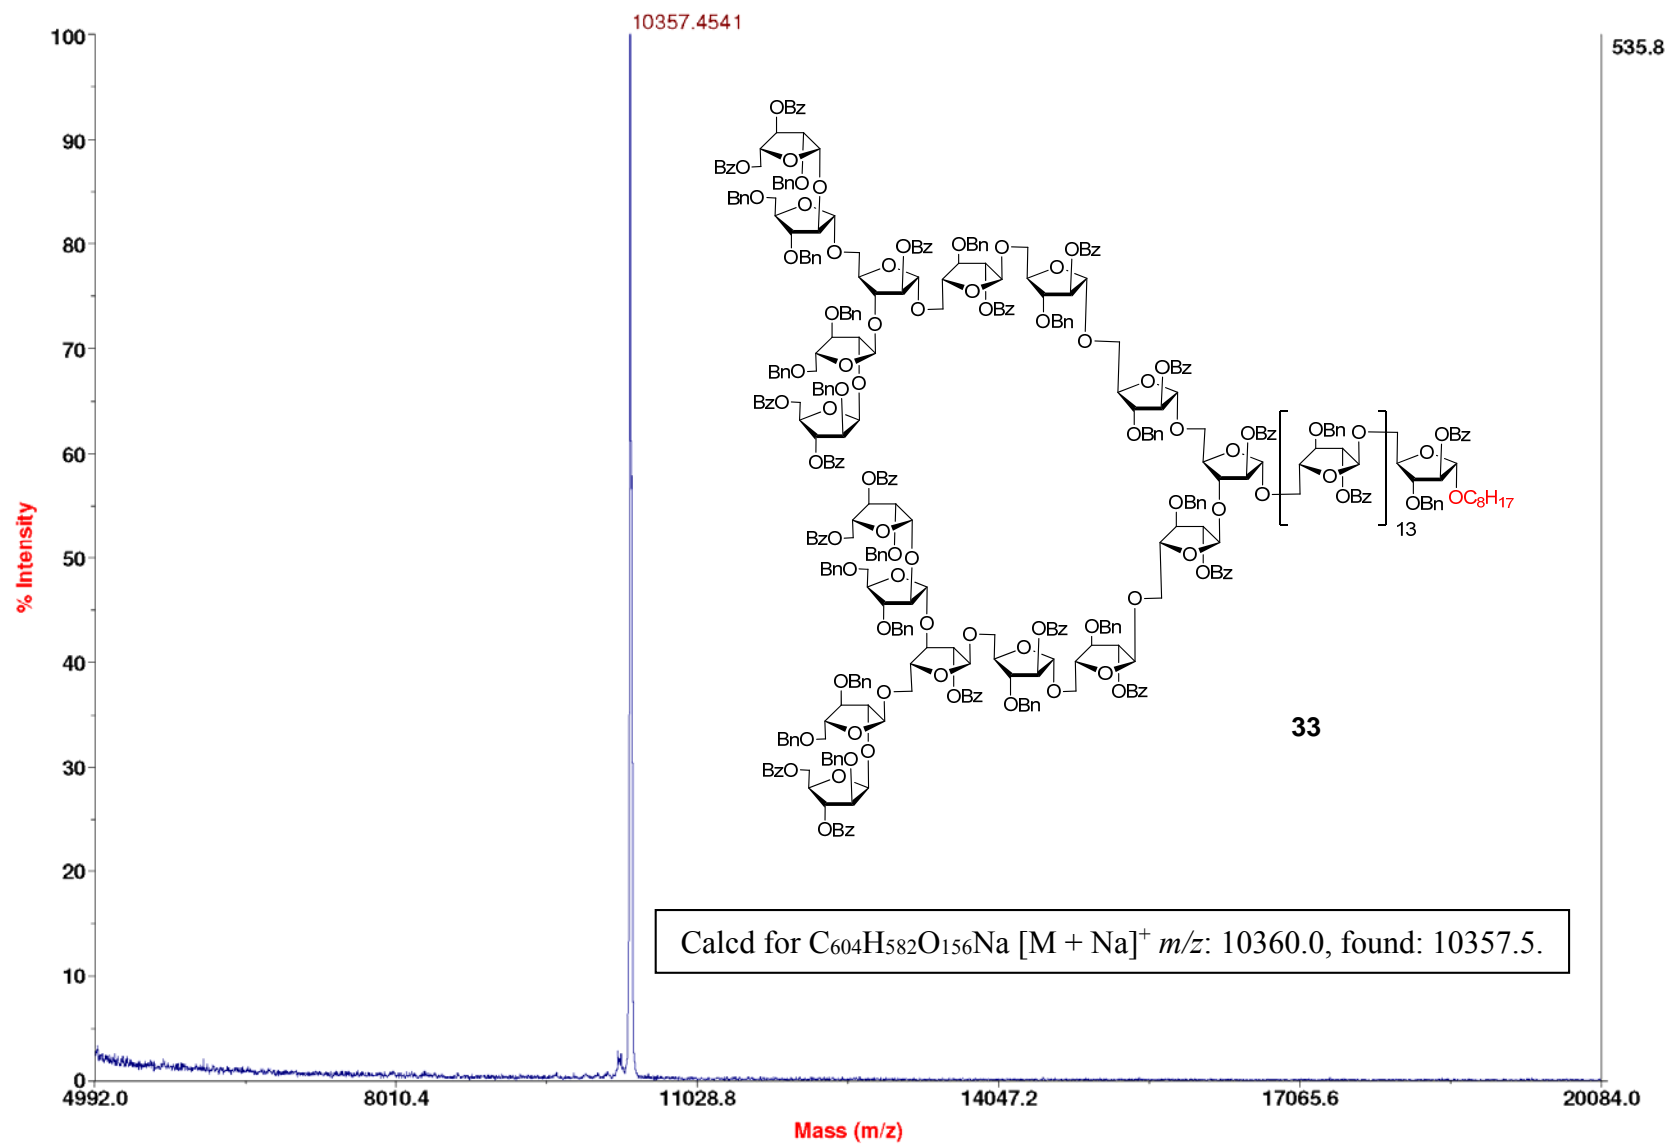

C:\AB SCIEX\TOFTOF Data\ExportT2D\zhong\20160225-2000\D4\_LINEAR.t2d

Printed: 16:02, March 16, 2016

Supplementary Figure 115. MALDI-TOF MS spectrum of compound 33

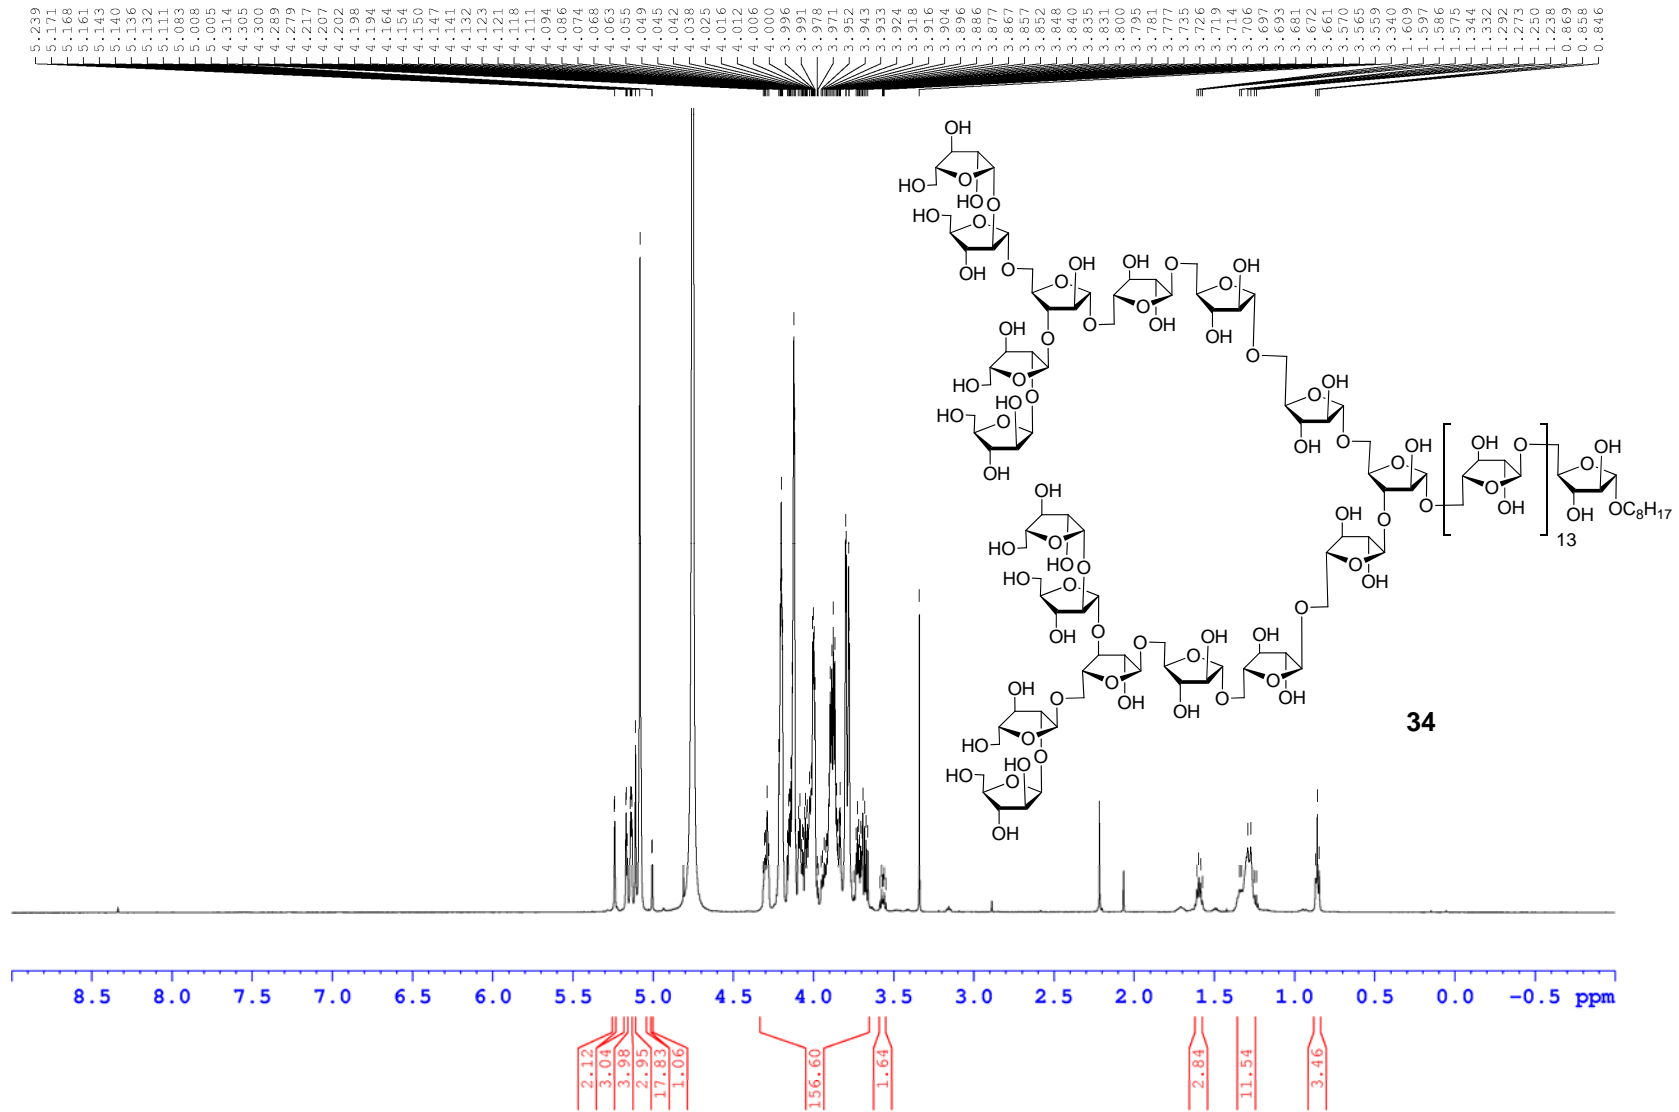

Supplementary Figure 116. <sup>1</sup>H NMR spectrum of compound 34

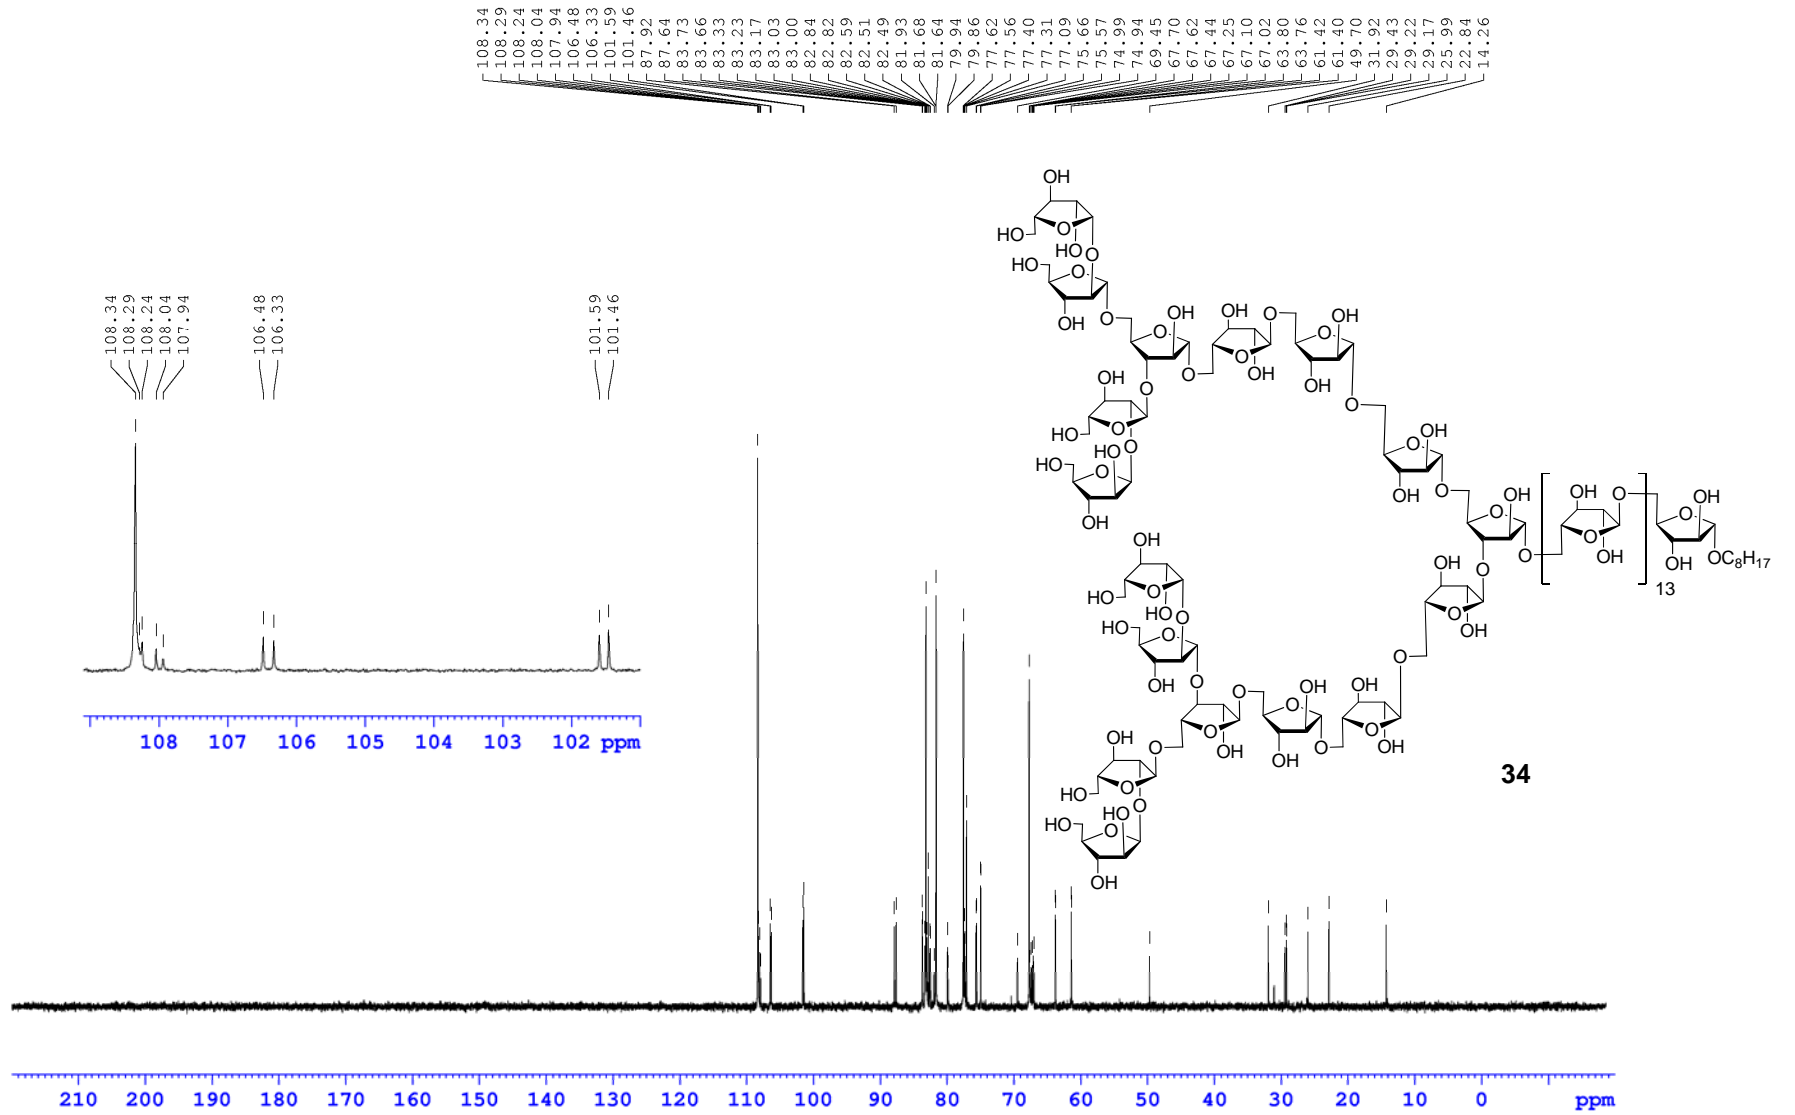

Supplementary Figure 117. <sup>13</sup>C NMR spectrum of compound 34

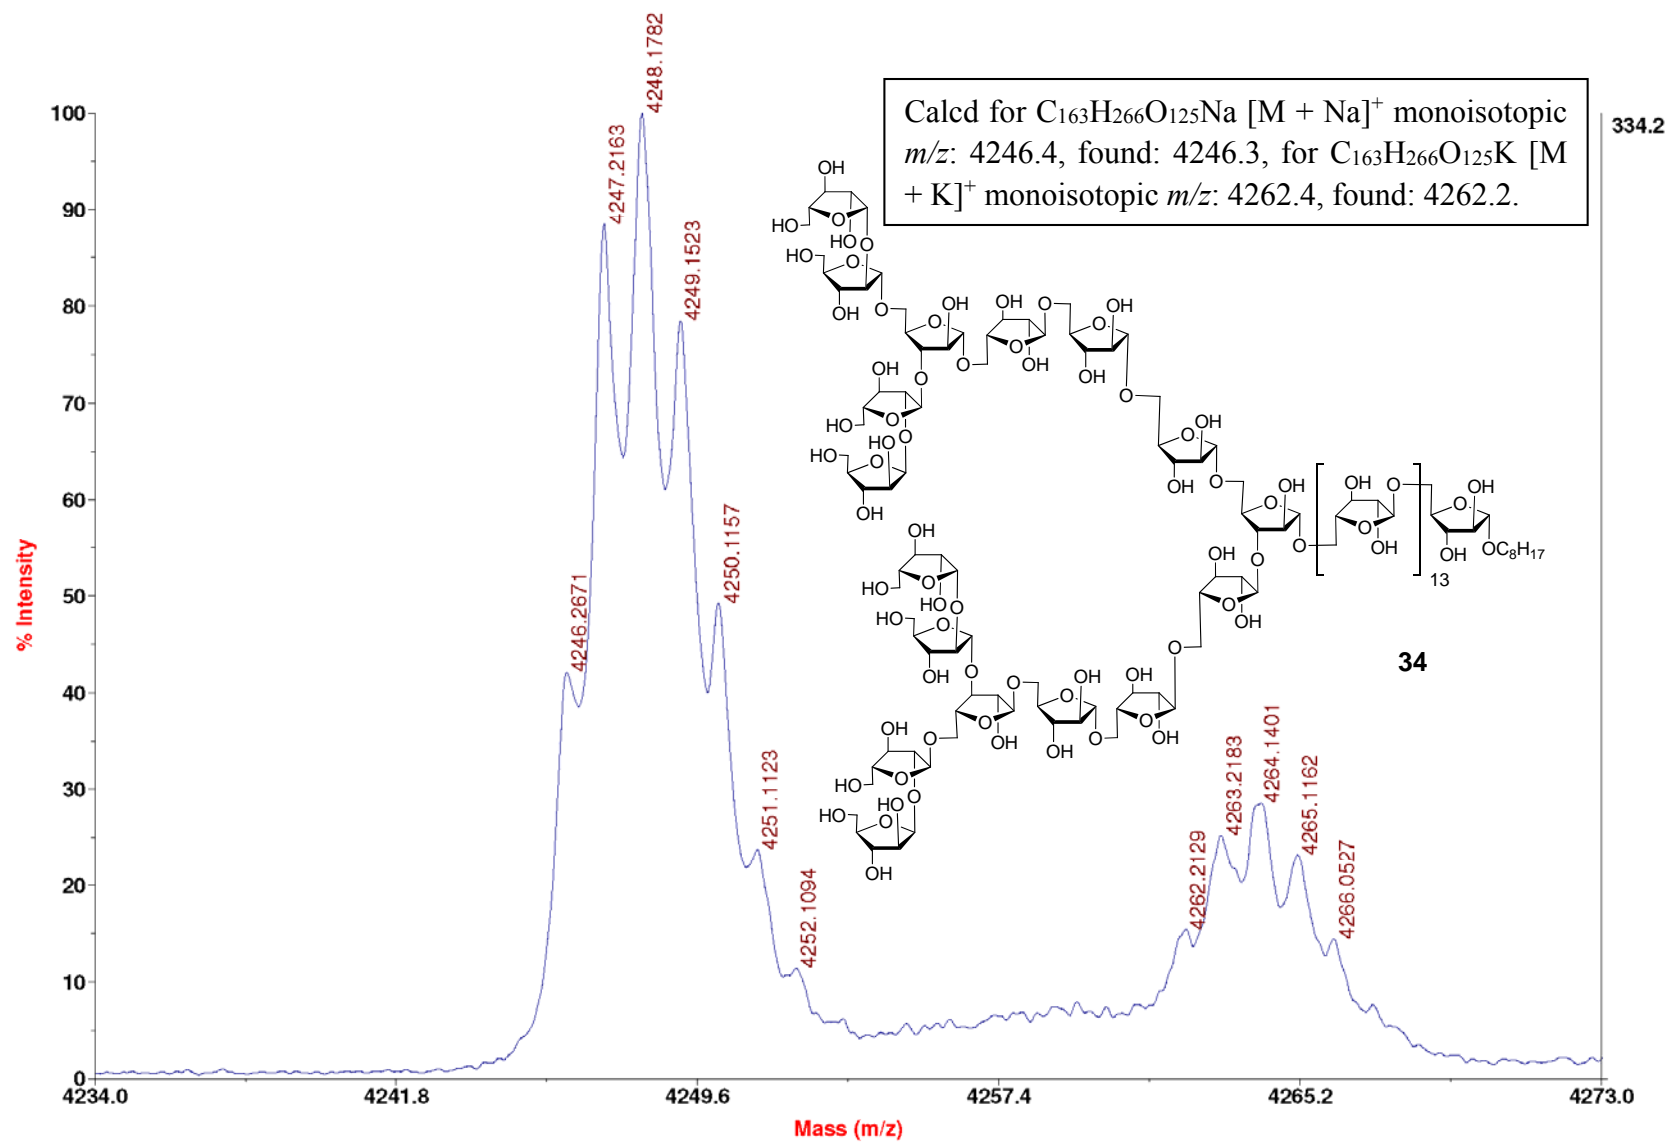

C:\AB SCIEX\TOFTOF Data\ExportT2D\zhong\20160223-1766\M10\_MS.t2d

Printed: 17:41, May 10, 2016

Supplementary Figure 118. MALDI-TOF MS spectrum of compound 34

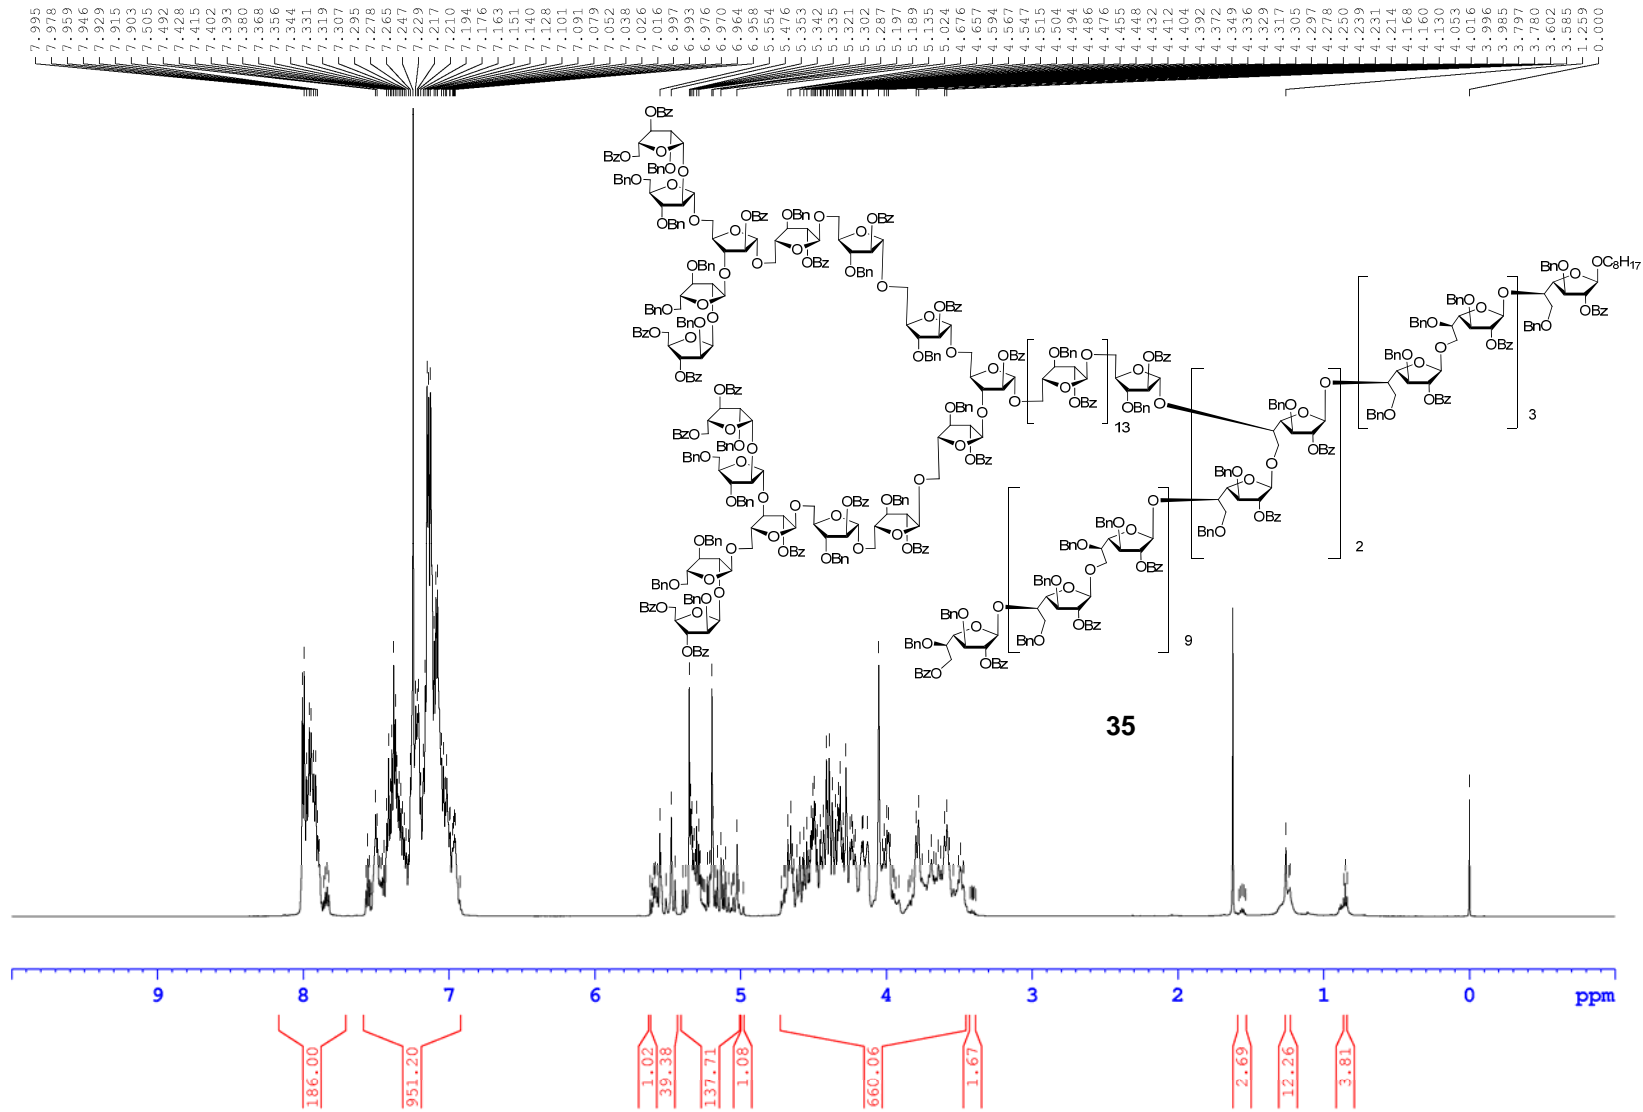

Supplementary Figure 119. <sup>1</sup>H NMR spectrum of compound 35

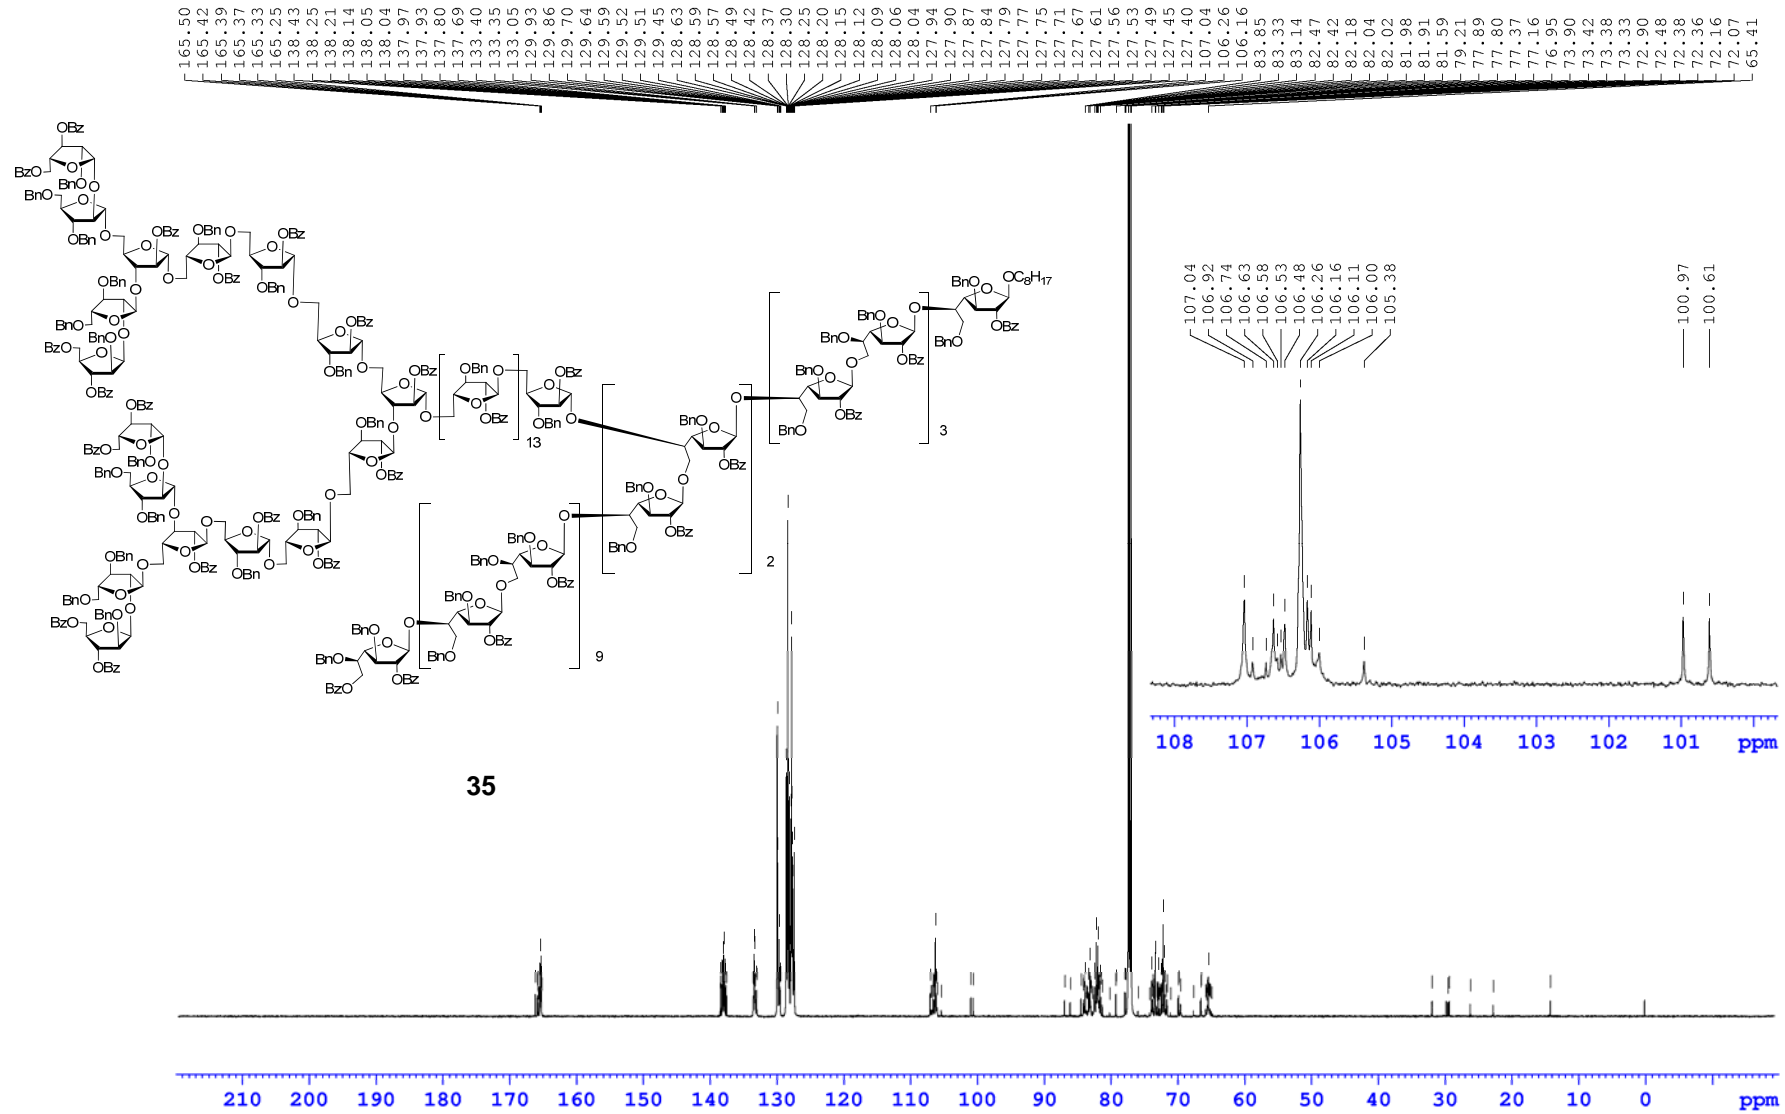

Supplementary Figure 120.  $^{13}\text{C}$  NMR spectrum of compound 35



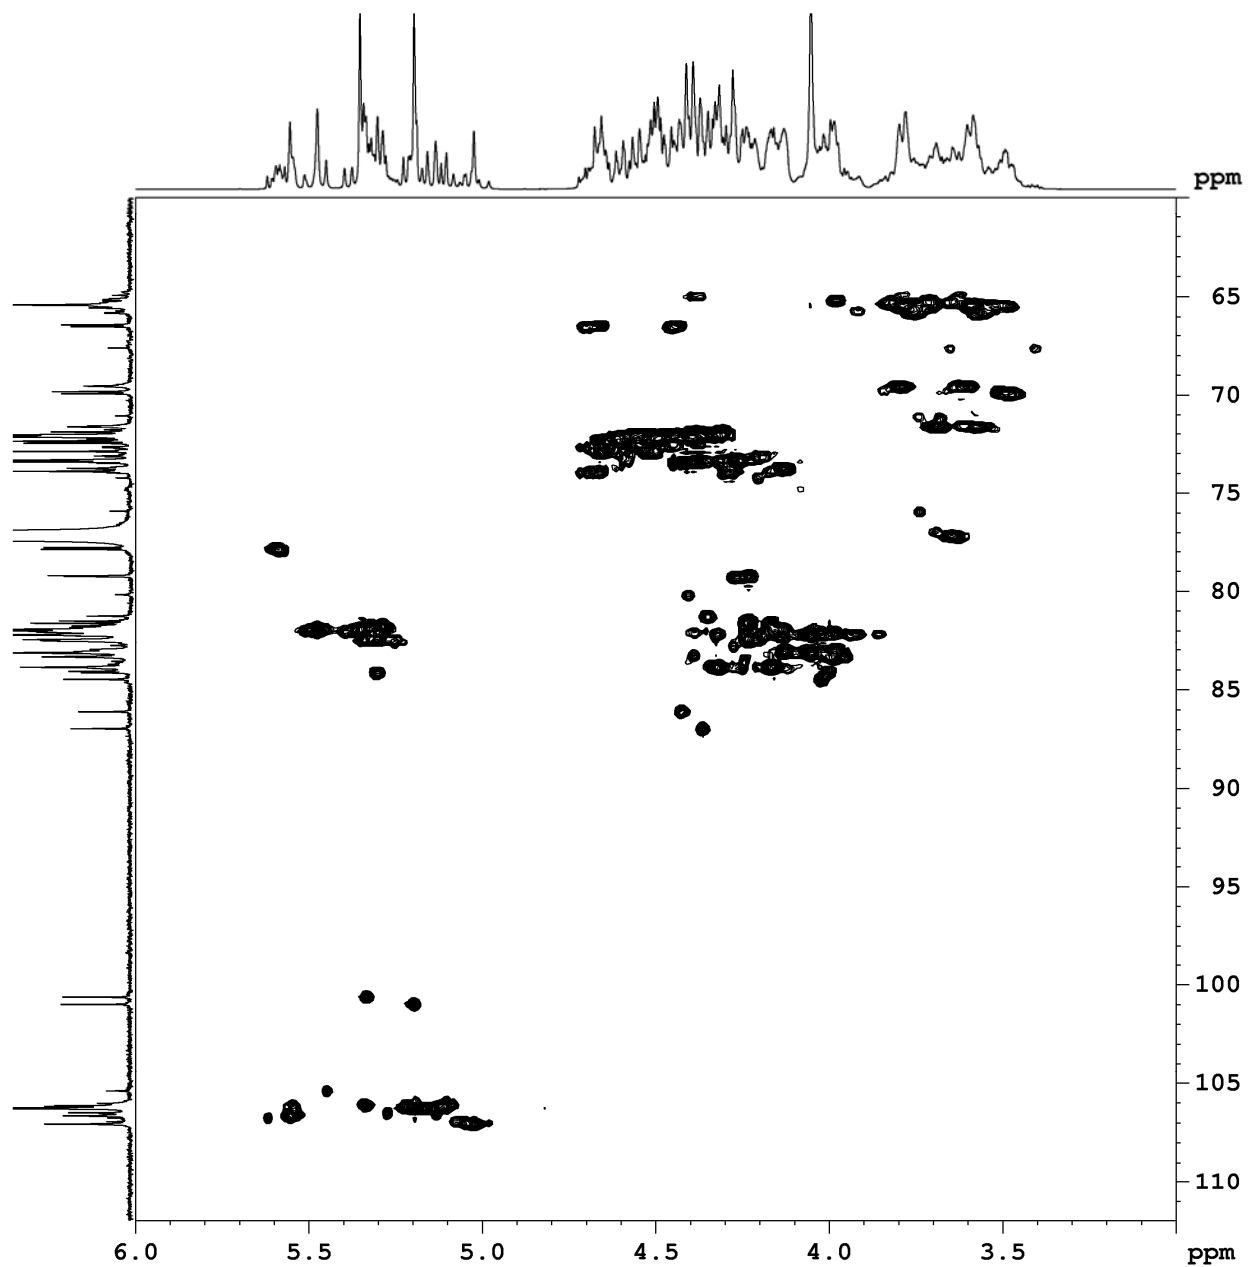

```

NAME          WY-0701
EXPNO         4
PROCNO        1
Date_         20160426
Time         11.36
INSTRUM       spect
PROBHD        5 mm CPTCI 1H-
PULPROG       hsqcetgpsi
TD            2048
SOLVENT       CDCl3
NS            16
DS            16
SWH           5733.945 Hz
FIDRES        2.799778 Hz
AQ            0.1786356 sec
RG            203
DW            87.200 usec
DE            10.00 usec
TE            300.4 K
CNST2         145.0000000
D0            0.00000300 sec
D1            1.50000000 sec
D4            0.00172414 sec
D11           0.03000000 sec
D13           0.00000400 sec
D16           0.00020000 sec
D24           0.00110000 sec
IN0           0.00002000 sec
ZGPTNS

```

```

===== CHANNEL f1 =====
NUC1          1H
P1            12.20 usec
P2            24.40 usec
P28           0.00 usec
ND0           ?
TD            512
SF01          150.9141 MHz
FIDRES        48.822838 Hz
SW            165.639 ppm
FnMODE        Echo-Antiecho
SI            1024
SF            600.1300241 MHz
WDW           QSINE
SSB           2
LB            0.00 Hz
GB            0
PC            1.40
SI            1024
MC2           echo-antiecho
SF            150.9027770 MHz
WDW           QSINE
SSB           2
LB            0.00 Hz
GB            0

```

Supplementary Figure 121. HSQC NMR spectrum of compound 35

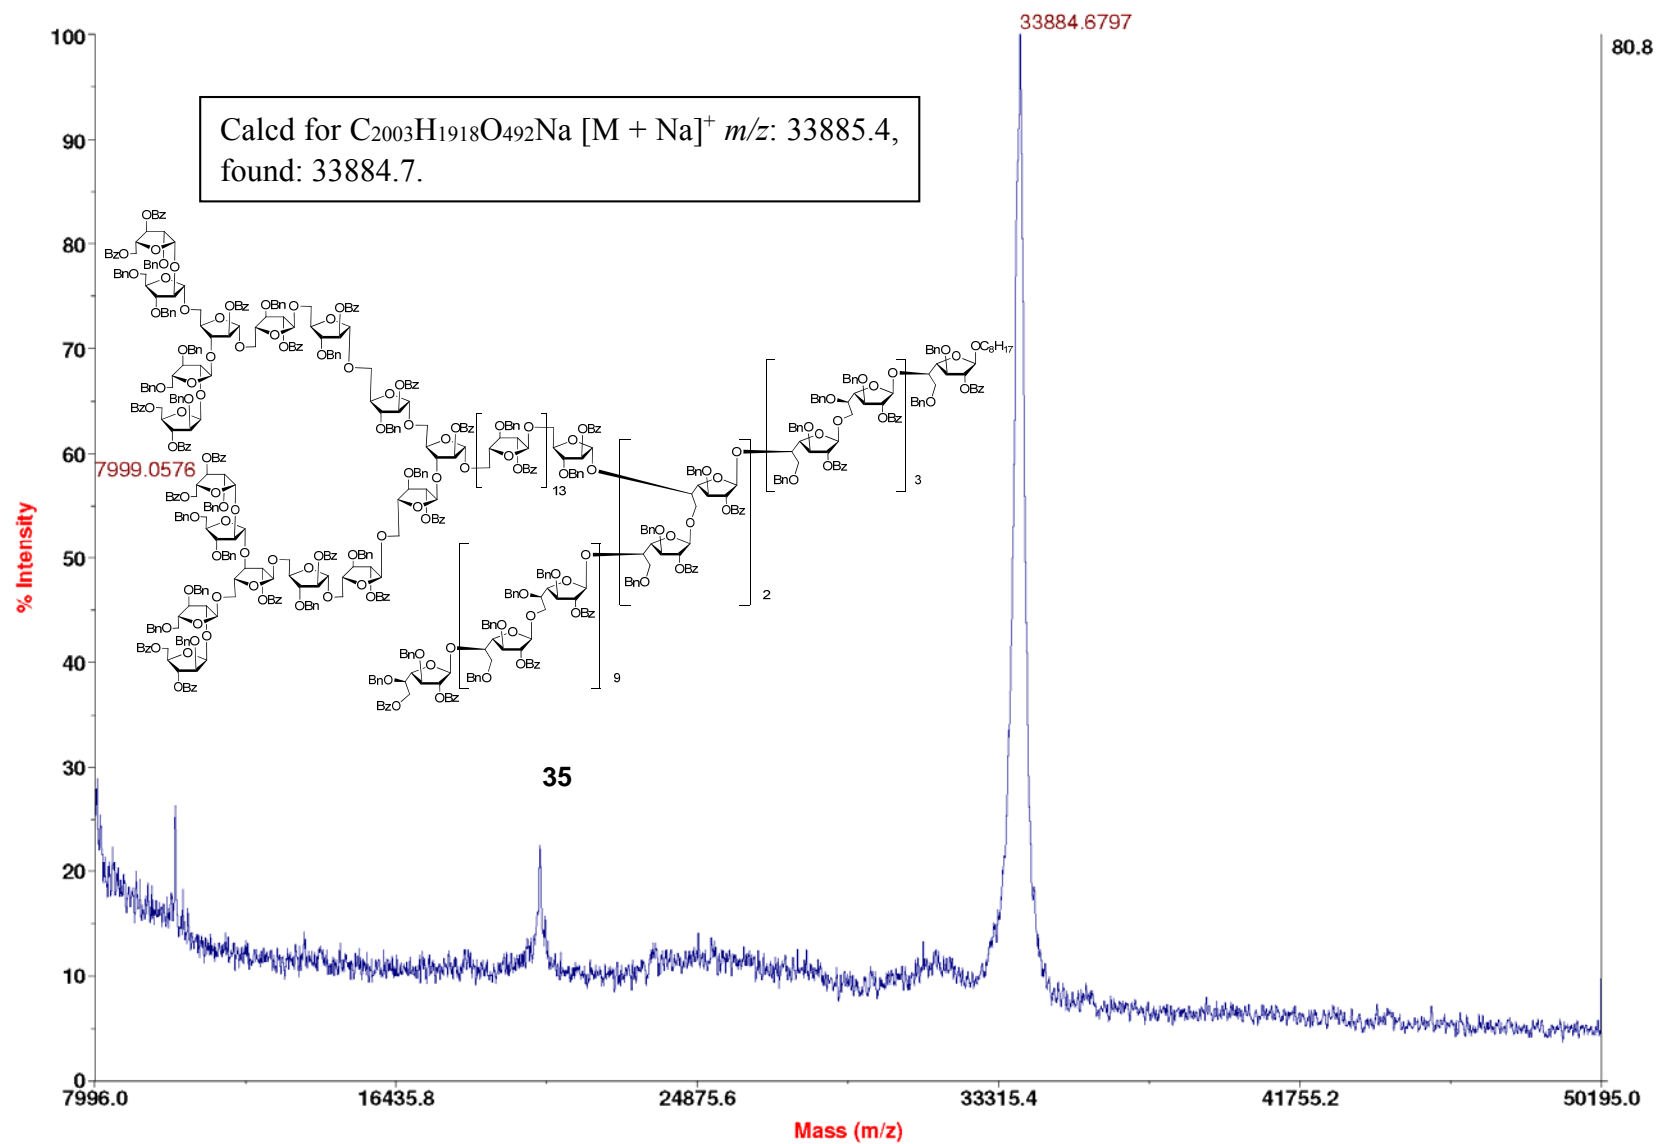

Supplementary Figure 122. MALDI-TOF MS spectrum of compound 35

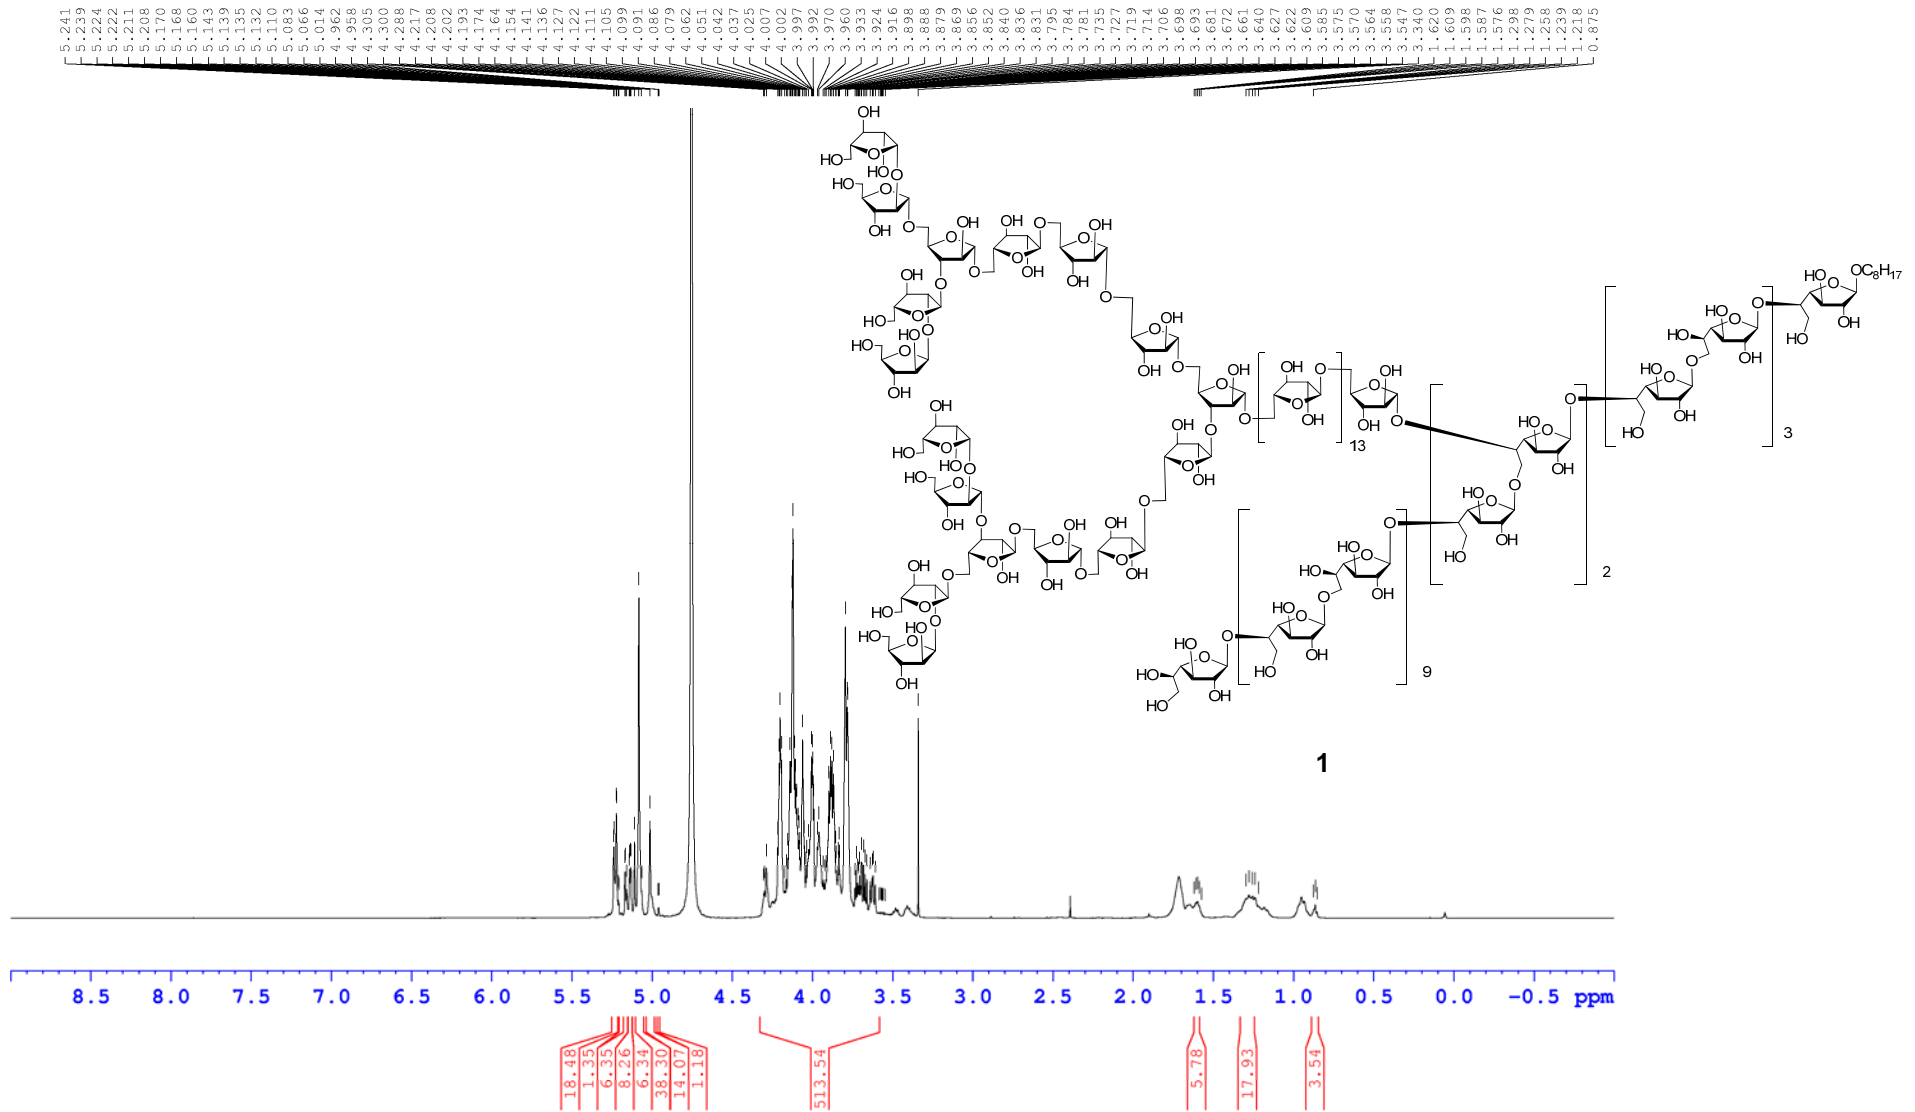

Supplementary Figure 123. <sup>1</sup>H NMR spectrum of compound 1

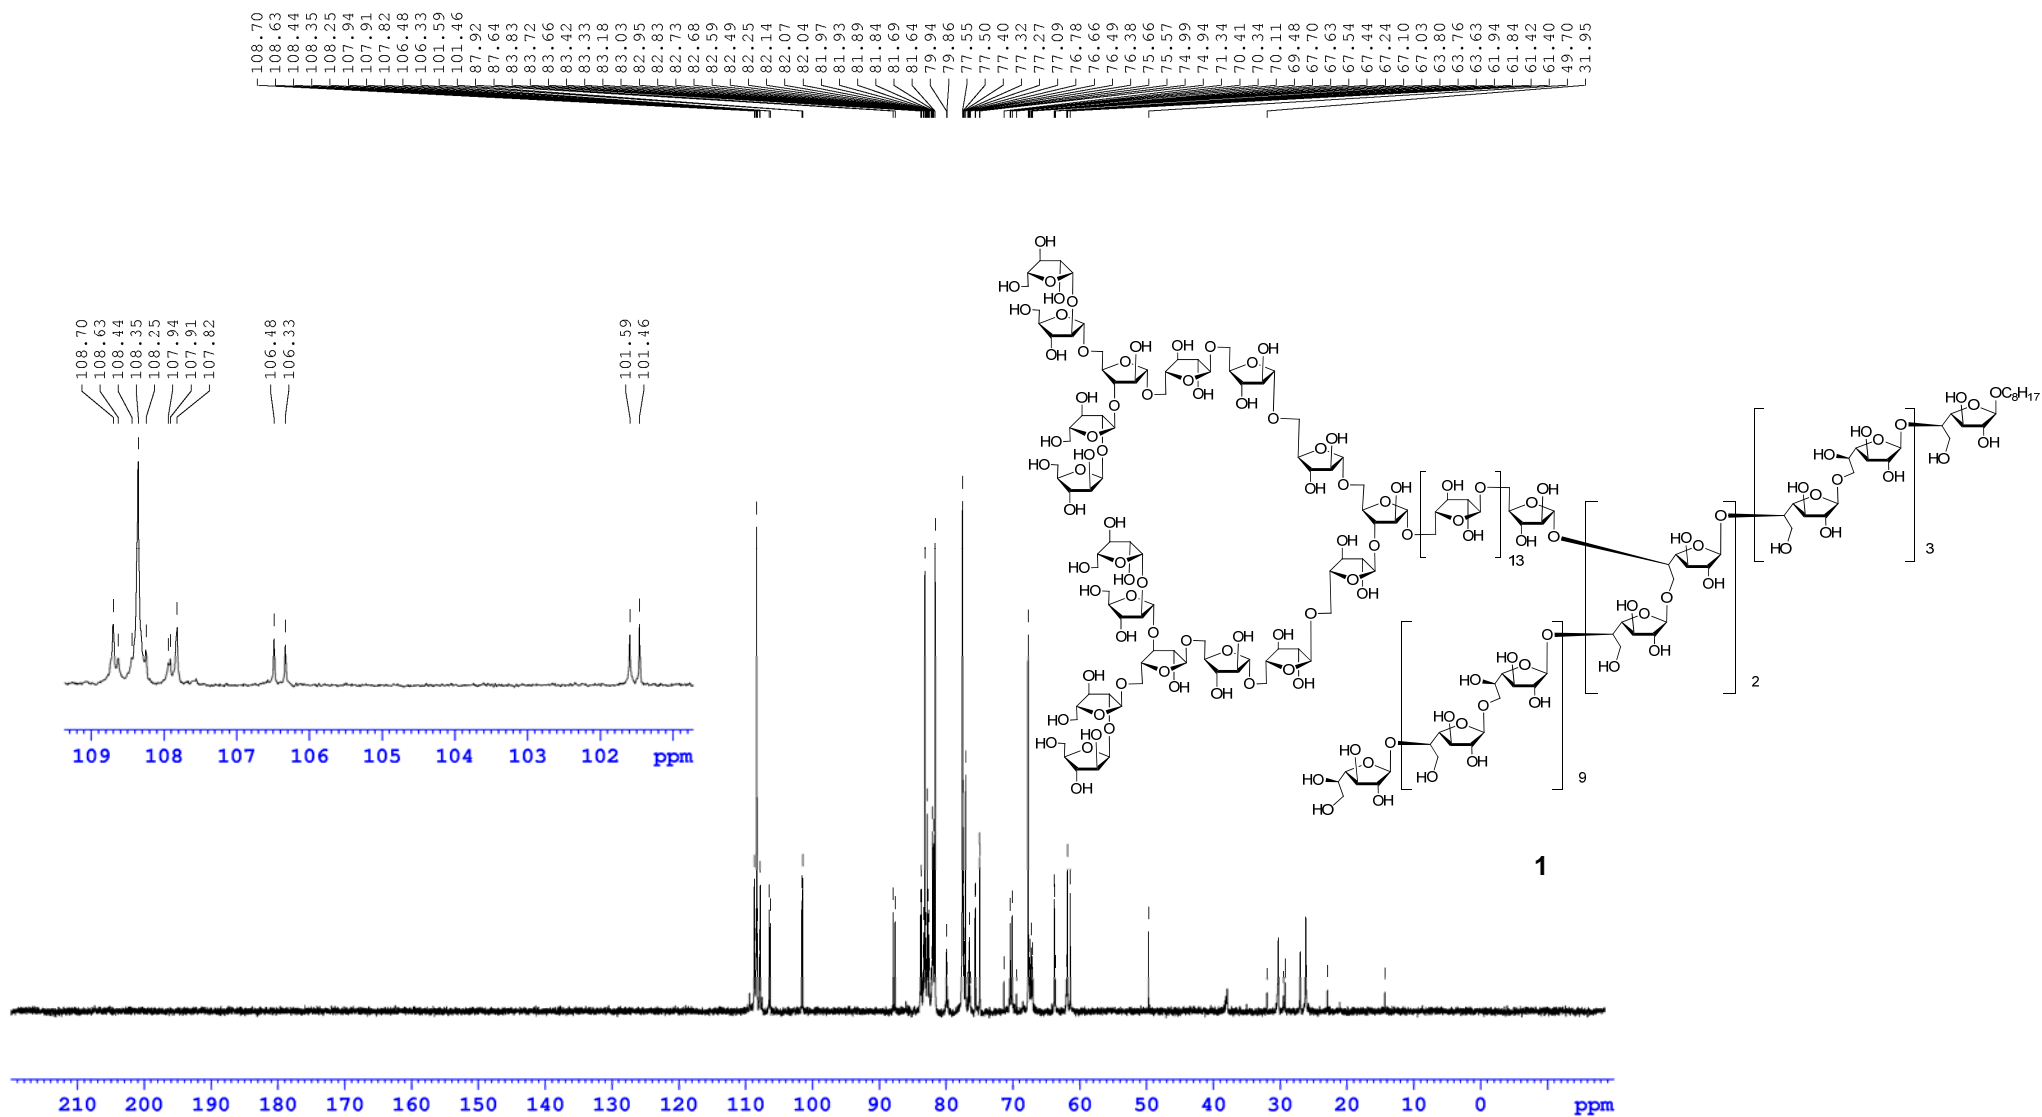

Supplementary Figure 124. <sup>13</sup>C NMR spectrum of compound 1

# Spectrum Report

Final - Shots 1200 - 160520; Run #22; Label L16

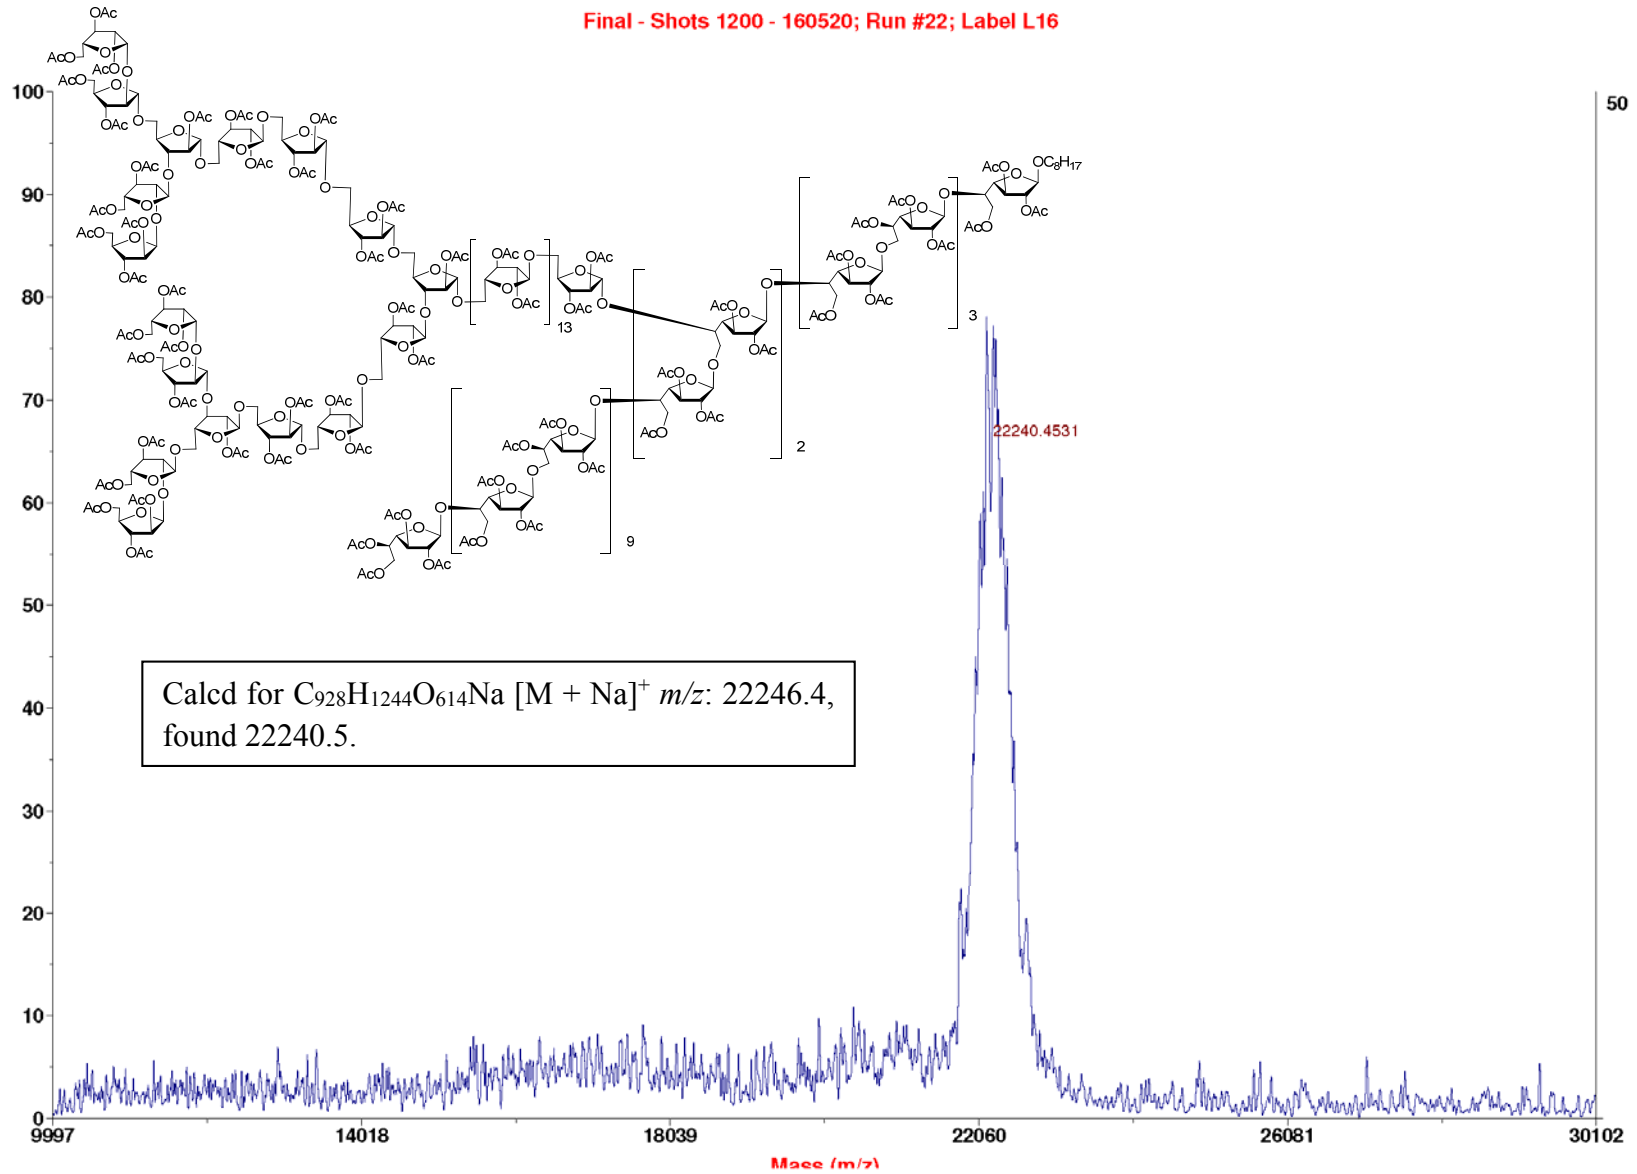

Supplementary Figure 125. MALDI-TOF MS spectrum of per-acetylated derivative of compound 1

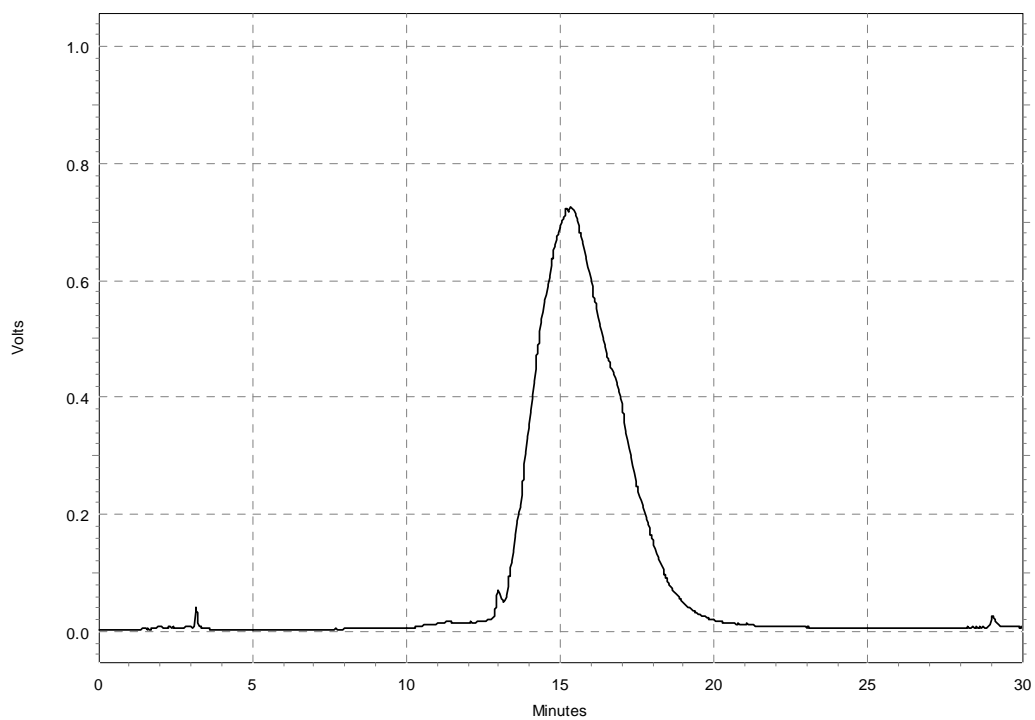

**Supplementary Figure 126. HPLC trace of compound 1.** Conditions: Waters XBridge<sup>®</sup> C18 5  $\mu$ m, 4.6  $\times$  250 mm column, 0-30 min linear gradient: 5-95% CH<sub>3</sub>CN, H<sub>2</sub>O, 1 mL/min flow.

**Supplementary Table 1. One-pot assembly of pentasaccharide 15.**

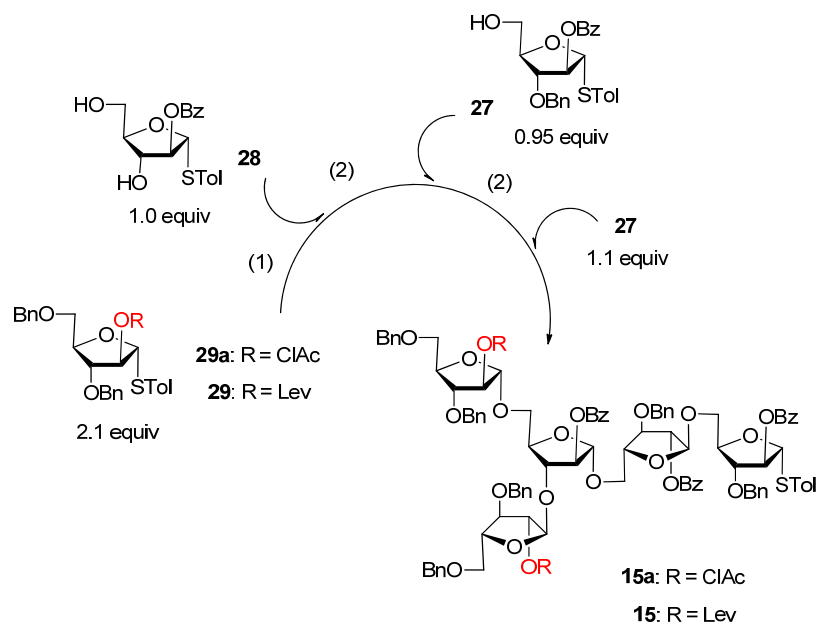

Reagents and conditions: (1) 4 Å molecular sieves, CH<sub>2</sub>Cl<sub>2</sub>, *p*-TolSCI, AgOTf, then **28**, -78 °C to room temperature; (2) *p*-TolSCI, AgOTf, then **27**, -78 °C to room temperature.

| Entry | Donor      | TTBP (equiv.)      | Product    | Yield (%) <sup>[c]</sup> |
|-------|------------|--------------------|------------|--------------------------|
| 1     | <b>29a</b> | 4.9 <sup>[a]</sup> | <b>15a</b> | 0                        |
| 2     | <b>29a</b> | 4.9 <sup>[b]</sup> | <b>15a</b> | 43                       |
| 3     | <b>29a</b> | 0                  | <b>15a</b> | 35                       |
| 4     | <b>29</b>  | 4.9 <sup>[a]</sup> | <b>15</b>  | 76                       |

[a] TTBP was added along with donor **29a** or **29**; [b] TTBP was added along with acceptor **28**; [c]

Isolated yield. TTBP, 2,4,6-tri-*tert*-butylpyrimidine.

Supplementary Table 2.  $\beta$ -Arabinofuranosylation by preactivation protocol.

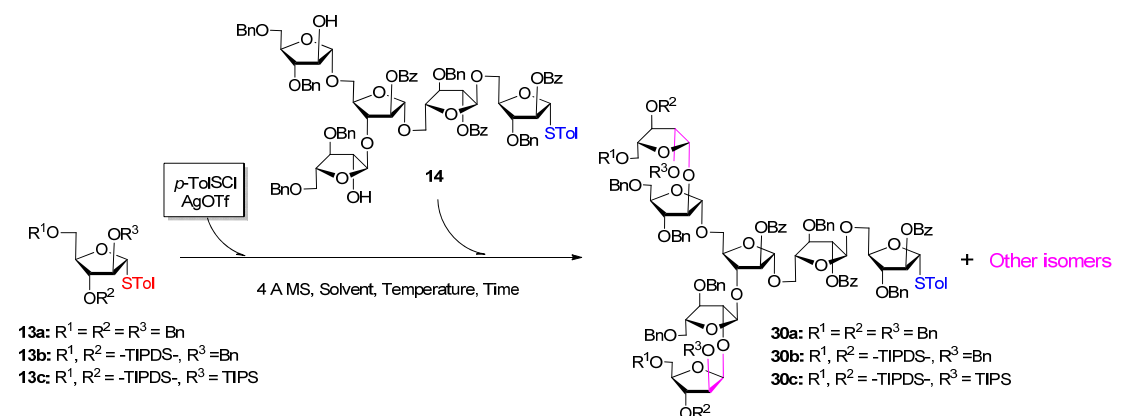

| Entry | Donor<br>( <b>13a-c</b> , equiv.) | Solvent                         | Temperature<br>(°C) | Time<br>(min) | Yield<br>(%) <sup>[a]</sup> | $\beta,\beta$ -isomer/other<br>isomers <sup>[b]</sup> |
|-------|-----------------------------------|---------------------------------|---------------------|---------------|-----------------------------|-------------------------------------------------------|
| 1     | <b>13a</b> , 4.0                  | CH <sub>2</sub> Cl <sub>2</sub> | -78 to r.t.         | 120           | 94                          | — <sup>[c]</sup>                                      |
| 2     | <b>13b</b> , 4.0                  | CH <sub>2</sub> Cl <sub>2</sub> | -78 to r.t.         | 120           | 51                          | 9:1                                                   |
| 3     | <b>13c</b> , 4.0                  | CH <sub>2</sub> Cl <sub>2</sub> | -78 to r.t.         | 120           | 22                          | <2:1                                                  |
| 4     | <b>13b</b> , 4.0                  | CH <sub>2</sub> Cl <sub>2</sub> | -78                 | 10            | 88                          | 9:1                                                   |
| 5     | <b>13b</b> , 3.0                  | CH <sub>2</sub> Cl <sub>2</sub> | -78                 | 10            | 81                          | 9:1                                                   |
| 6     | <b>13b</b> , 4.0                  | Et <sub>2</sub> O               | -78                 | 10            | 92                          | 1.5:1                                                 |

[a] Isolated yield of all the anomeric isomers; [b] Determined by <sup>1</sup>H NMR; [c] Beyond calculation due to peak overlapping.



### Supplementary Table 3. Assembly of fully protected arabinogalactan 35.

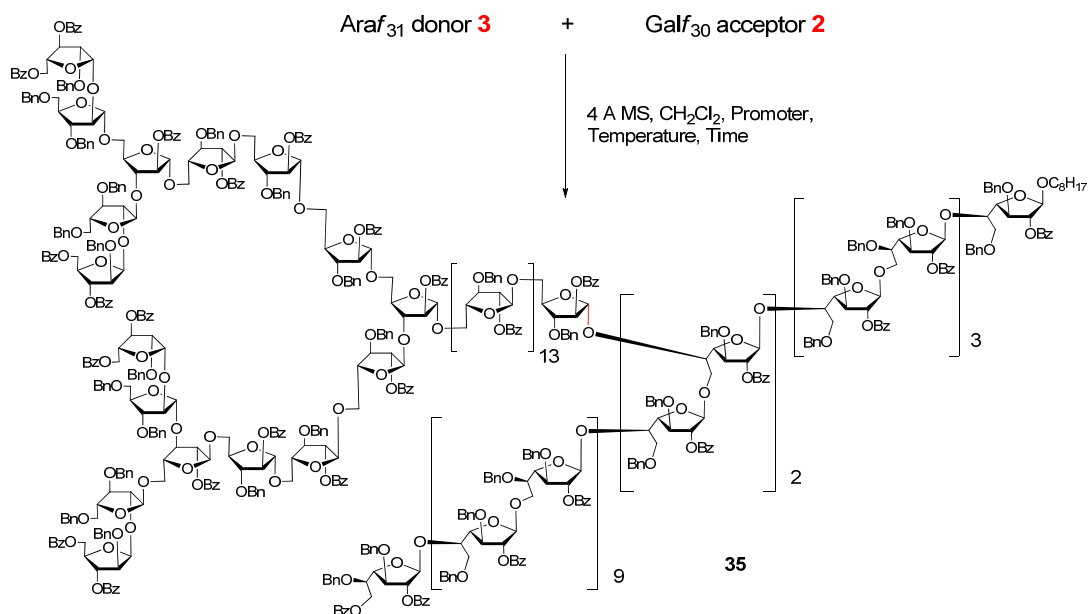

| Entry <sup>[a]</sup> | Promoter system                                                                    | Temperature (°C) | Time (h) | Yield (%) <sup>[e]</sup> |
|----------------------|------------------------------------------------------------------------------------|------------------|----------|--------------------------|
| 1 <sup>[b]</sup>     | <i>p</i> -TolSCl/AgOTf                                                             | -40              | 10       | 0                        |
| 2                    | <i>p</i> -TolSCl/AgOTf                                                             | -40              | 10       | 0                        |
| 3                    | NIS/AgOTf                                                                          | -40              | 10       | 0                        |
| 4                    | NIS/AgOTf                                                                          | -20              | 10       | 0                        |
| 5                    | NIS/AgOTf                                                                          | 0                | 10       | 0                        |
| 6                    | NIS/TfOH                                                                           | -40 to 0         | 2        | 0                        |
| 7 <sup>[c]</sup>     | NIS/TfOH                                                                           | -40 to 0         | 2        | 0                        |
| 8                    | <i>N</i> -( <i>p</i> -methylphenylthio)- $\epsilon$ -caprolactam/Tf <sub>2</sub> O | -40              | 4        | 0                        |
| 9                    | <i>N</i> -( <i>p</i> -methylphenylthio)- $\epsilon$ -caprolactam/Tf <sub>2</sub> O | r.t.             | 0.1      | 0                        |
| 10 <sup>[d]</sup>    | TBPA                                                                               | 0                | 4        | 0                        |
| 11                   | Ph <sub>3</sub> Bi(OTf) <sub>2</sub>                                               | r.t.             | 10       | <10                      |
| 12                   | BSP/Tf <sub>2</sub> O                                                              | -40              | 10       | 0                        |
| 13                   | Ph <sub>2</sub> SO/Tf <sub>2</sub> O                                               | -40              | 10       | trace <sup>[f]</sup>     |
| 14                   | BSM/Tf <sub>2</sub> O                                                              | -40              | 10       | 84                       |

[a] Reaction conditions: **3** (5.0 equiv.), **2** (1.0 equiv.); [b] The donor was pre-activated in the absence of acceptor; [c] The reaction was conducted by inverse procedure<sup>4</sup>; [d] The solvent was CH<sub>2</sub>Cl<sub>2</sub>/CH<sub>3</sub>CN (1:1); [e] Isolated yield. [f] Some monoglycosylation product was observed. TBPA, tris(4-bromophenyl)ammoniumyl hexachloroantimonate. BSP, 1-benzenesulfinyl piperidine. BSM, benzenesulfinyl morpholine.

## Supplementary Methods

### I. General methods

Reactions were carried out in oven-dried glassware. Substrates for glycosylation were dried by azeotropic removal with toluene. All chemicals were purchased as reagent grade and used without further purification, unless otherwise noted. All solvents were purified before use.  $\text{CH}_2\text{Cl}_2$ ,  $\text{CH}_3\text{CN}$ , and pyridine were distilled over  $\text{CaH}_2$ . Methanol was distilled from magnesium. DMF was stirred with  $\text{CaH}_2$  and distilled under reduced pressure. Toluene was distilled over sodium. Ether was distilled with potassium and sodium. All reactions were carried out under anhydrous conditions with freshly distilled solvents under a positive pressure of argon, unless otherwise noted. Reactions were monitored by thin-layer chromatography (TLC) on silica gel-coated aluminum plates (60 F<sub>254</sub>, E. Merck). Spots were visualized by UV light (254 nm) and charring with a solution of  $(\text{NH}_4)_6\text{Mo}_7\text{O}_{24}\cdot 4\text{H}_2\text{O}$  (24.00 g, 19.4 mmol) and  $\text{Ce}(\text{NH}_4)_2(\text{NO}_3)_6$  (0.50 g, 0.9 mmol) in sulfuric acid (5%, 500 mL). Column chromatography was performed on silica gel (200—300 mesh). Gel filtration was performed on Bio-Beads S-X1 or Sephadex LH-20 (Pharmacia). Optical rotations were obtained on a Hanon P850 Automatic Polarimeter.  $^1\text{H}$  NMR spectra were recorded at room temperature for solutions in  $\text{CDCl}_3$  or  $\text{D}_2\text{O}$  with the Avance III-400 or III-600 instruments (Bruker), and the chemical shifts were referenced to the peak for TMS (0 ppm,  $\text{CDCl}_3$ ) or external  $\text{CH}_3\text{OH}$  (3.34 ppm,  $\text{D}_2\text{O}$ ).  $^{13}\text{C}$  NMR spectra were recorded using the same NMR spectrometers and the chemical shifts were reported relative to internal  $\text{CDCl}_3$  ( $\delta = 77.16$  ppm) or external  $\text{CH}_3\text{OH}$  (49.70 ppm,  $\text{D}_2\text{O}$ ). Assignments of resonances in  $^1\text{H}$  and  $^{13}\text{C}$  NMR spectra were done using  $^1\text{H}$ - $^1\text{H}$  COSY, HSQC and HMBC experiments (600 MHz for all the oligosaccharides synthesized in this study). The following standard abbreviations are used to indicate multiplicity: s = singlet, d = doublet, t = triplet, m = multiplet, dd = doublet of doublets, dt = doublet of triplets, td = triplet of doublets and br = broad. HRMS experiments were performed on a Waters Xevo G2 Q-TOF spectrometer or a Bruker APEX IV FTMS instrument. MALDI-TOF mass spectra were performed on an AB

SCIEX 5800 spectrometer with 2,5-dihydroxybenzoic acid as the matrix. Analytical HPLC was performed on a Shimadzu LC-10AT liquid chromatograph equipped with ELSD detector (ELSD 2000ES).

## II. Synthetic methods and characterization data

### Synthesis of Gal<sub>f</sub><sub>30</sub> acceptor 2:

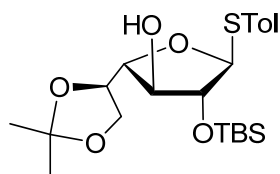

***p*-Tolyl 2-*O*-*tert*-butyldimethylsilyl-5,6-*O*-isopropylidene-1-thio- $\beta$ -D-galactofuranoside (**18b**):** To a solution of **18a**<sup>1</sup> (18.0 g, 55.1 mmol) and imidazole (11.3 g, 165.3 mmol) in anhydrous CH<sub>2</sub>Cl<sub>2</sub> (150 mL) was added TBSCl (10.0 g, 66.1 mmol) at 0 °C. After stirring for 2 h at the same temperature, the solution was quenched with CH<sub>3</sub>OH (5 mL) and stirred for another 30 min at room temperature. The reaction mixture was then concentrated under reduced pressure, and the residue was purified by column chromatography on silica gel (petroleum ether/ethyl acetate, 5:1) to afford **18b** (16.0 g, 66%) as colorless oil. *R*<sub>f</sub> = 0.50 (petroleum ether/ethyl acetate, 3:1); [ $\alpha$ ]<sub>D</sub><sup>30</sup> -123.5 (*c* 1.6, CH<sub>2</sub>Cl<sub>2</sub>); <sup>1</sup>H NMR (400 MHz, CDCl<sub>3</sub>)  $\delta$  7.39 (d, *J* = 8.1 Hz, 2H, Ar), 7.12 (d, *J* = 7.9 Hz, 2H, Ar), 5.25 (d, *J* = 3.3 Hz, 1H, H-1), 4.33 (dd, *J* = 12.2, 6.5 Hz, 1H, H-5), 4.13 (t, *J* = 3.4 Hz, 1H, H-2), 4.10 (t, *J* = 5.7 Hz, 1H, H-4), 4.02 (dd, *J* = 8.5, 6.9 Hz, 1H, H-6a), 3.97 – 3.93 (m, 2H, H-3, H-6b), 2.33 (s, 3H, tolyl CH<sub>3</sub>), 2.22 (d, *J* = 7.1 Hz, 1H, -OH), 1.44 (s, 3H, *i*-Pr), 1.36 (s, 3H, *i*-Pr), 0.89 (s, 9H, *t*-Bu), 0.10 (s, 3H, CH<sub>3</sub>), 0.09 (s, 3H, CH<sub>3</sub>); <sup>13</sup>C NMR (100 MHz, CDCl<sub>3</sub>)  $\delta$  137.95 (Ar), 132.79 (Ar), 130.02 (Ar), 129.90 (Ar), 109.81 (*i*-Pr), 92.76 (C-1), 83.88 (C-4), 82.96 (C-2), 78.95 (C-3), 75.28 (C-5), 65.45 (C-6), 26.51 (*i*-Pr), 25.81 (*t*-Bu), 25.25 (*i*-Pr), 21.23 (tolyl CH<sub>3</sub>), 18.06 (*t*-Bu), -4.52 (CH<sub>3</sub>), -4.59 (CH<sub>3</sub>); HRMS (ESI) Calcd for C<sub>22</sub>H<sub>40</sub>NO<sub>5</sub>SSi [M + NH<sub>4</sub>]<sup>+</sup>: 458.2391, found: 458.2386.

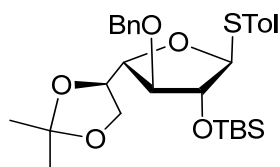

***p*-Tolyl 2-*O*-*tert*-butyldimethylsilyl-3-*O*-benzyl-5,6-*O*-isopropylidene-1-thio- $\beta$ -D-galactofuranoside (**18c**):** To a solution of **18b** (15.0 g, 34.0 mmol) and BnBr (4.8 mL, 40.8 mmol) in anhydrous DMF (50 mL) was slowly added NaH (1.5 g, 37.4 mmol, 60% in mineral oil) at 0 °C. The reaction mixture was slowly warmed to room temperature and stirred for 1 h, quenched with ice water, and extracted with CH<sub>2</sub>Cl<sub>2</sub> (2 × 150 mL). The combined organic layer, after being washed with a saturated aqueous NH<sub>4</sub>Cl solution (150 mL) and brine (150 mL), was dried over Na<sub>2</sub>SO<sub>4</sub>, filtered, and concentrated. The residue was purified by column chromatography on silica gel (petroleum ether/ethyl acetate, 25:1) to afford **18c** (14.6 g, 81%) as colorless syrup. *R*<sub>f</sub> = 0.44 (petroleum ether/ethyl acetate, 8:1);  $[\alpha]_{\text{D}}^{30}$  -159.6 (*c* 4.5, CH<sub>2</sub>Cl<sub>2</sub>); <sup>1</sup>H NMR (400 MHz, CDCl<sub>3</sub>)  $\delta$  7.43 (d, *J* = 8.0 Hz, 2H, Ar), 7.39 – 7.30 (m, 5H, Ar), 7.12 (d, *J* = 7.9 Hz, 2H, Ar), 5.30 (d, *J* = 2.3 Hz, 1H, H-1), 4.72 (d, *J* = 11.8 Hz, 1H, PhCH<sub>2</sub>), 4.58 (d, *J* = 11.8 Hz, 1H, PhCH<sub>2</sub>), 4.37 (t, *J* = 2.4 Hz, 1H, H-2), 4.30 – 4.25 (m, 2H, H-4, H-5), 3.95 – 3.88 (m, 2H, H-6a, H-6b), 3.84 (dd, *J* = 4.3, 2.6 Hz, 1H, H-3), 2.34 (s, 3H, tolyl CH<sub>3</sub>), 1.42 (s, 3H, *i*-Pr), 1.37 (s, 3H, *i*-Pr), 0.92 (s, 9H, *t*-Bu), 0.15 (s, 6H, CH<sub>3</sub>); <sup>13</sup>C NMR (100 MHz, CDCl<sub>3</sub>)  $\delta$  137.73 (Ar), 137.45 (Ar), 132.40 (Ar), 131.27 (Ar), 129.76 (Ar), 128.53 (Ar), 127.95 (Ar), 127.84 (Ar), 109.63 (*i*-Pr), 94.13 (C-1), 86.12 (C-3), 82.33 (C-4), 82.00 (C-2), 75.55 (C-5), 72.43 (PhCH<sub>2</sub>), 65.59 (C-6), 26.47 (*i*-Pr), 25.80 (*t*-Bu), 25.38 (*i*-Pr), 21.17 (tolyl CH<sub>3</sub>), 17.96 (*t*-Bu), -4.22 (CH<sub>3</sub>), -4.77 (CH<sub>3</sub>); HRMS (ESI) Calcd for C<sub>29</sub>H<sub>46</sub>NO<sub>5</sub>SSi [M + NH<sub>4</sub>]<sup>+</sup>: 548.2861, found: 548.2862.

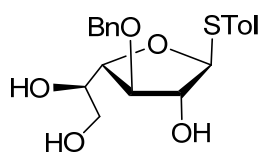

***p*-Tolyl 3-*O*-benzyl-1-thio- $\beta$ -D-galactofuranoside (**18d**):** To a solution of **18c** (18.0 g, 33.9 mmol) in THF (50 mL) was added TBAF (37.3 mL, 37.3 mmol, 1 M in THF) at

room temperature. After stirring for 30 min, the reaction mixture was concentrated to give a crude residue, which was dissolved in 70% AcOH aqueous solution (100 mL). The resulting mixture was stirred overnight at 50 °C, and concentrated *in vacuo*. The residue was then purified by column chromatography on silica gel (petroleum ether/acetone, 2:1) to afford **18d** (12.1 g, 94% for two steps) as colorless syrup.  $R_f = 0.37$  (petroleum ether/acetone, 1:1);  $[\alpha]_D^{30} -233.1$  ( $c$  0.8, CH<sub>2</sub>Cl<sub>2</sub>); <sup>1</sup>H NMR (400 MHz, CDCl<sub>3</sub>)  $\delta$  7.38 – 7.29 (m, 7H, Ar), 7.12 (d,  $J = 7.9$  Hz, 2H, Ar), 5.39 (d,  $J = 2.0$  Hz, 1H, H-1), 4.76 (d,  $J = 11.9$  Hz, 1H, PhCH<sub>2</sub>), 4.61 (d,  $J = 11.9$  Hz, 1H, PhCH<sub>2</sub>), 4.35 – 4.31 (m, 2H, H-2, H-4), 4.04 (dd,  $J = 4.2, 2.2$  Hz, 1H, H-3), 3.84 – 3.79 (m, 2H, H-5, H-6a), 3.76 – 3.70 (m, 1H, H-6b), 3.31 (d,  $J = 8.4$  Hz, 1H, -OH), 2.79 (d,  $J = 5.4$  Hz, 1H, -OH), 2.33 (s, 3H, tolyl CH<sub>3</sub>), 2.08 (dd,  $J = 8.2, 3.6$  Hz, 1H, -OH); <sup>13</sup>C NMR (100 MHz, CDCl<sub>3</sub>)  $\delta$  137.83 (Ar), 137.58 (Ar), 132.39 (Ar), 131.09 (Ar), 129.95 (Ar), 128.73 (Ar), 128.19 (Ar), 128.04 (Ar), 95.07 (C-1), 85.53 (C-3), 84.57 (C-4), 79.51 (C-2), 72.48 (PhCH<sub>2</sub>), 70.95 (C-5), 64.61 (C-6), 21.24 (tolyl CH<sub>3</sub>); HRMS (ESI) Calcd for C<sub>20</sub>H<sub>28</sub>NO<sub>5</sub>S [M + NH<sub>4</sub>]<sup>+</sup>: 394.1683, found: 394.1681.

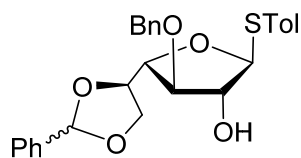

***p*-Tolyl 3-*O*-benzyl-5,6-*O*-(*R/S*)-benzylidene-1-thio- $\beta$ -D-galactofuranoside (**18e**):**

To a solution of **18d** (13.0 g, 34.5 mmol) in anhydrous DMF (60 mL) was added benzaldehyde dimethyl acetal (5.7 mL, 38.0 mmol) and a catalytic amount of PPTS (170 mg, 0.69 mmol). The reaction was conducted under reduced pressure at 60 °C for 1 h, quenched with Et<sub>3</sub>N (1 mL) and concentrated. The residue was purified by column chromatography on silica gel (petroleum ether/acetone, 8:1) to afford **18e** (14.9 g, 93%) as colorless syrup.  $R_f = 0.40$  (petroleum ether/acetone, 3:1); <sup>1</sup>H NMR (400 MHz, CDCl<sub>3</sub>)  $\delta$  7.46 – 7.28 (m, 24H), 7.13 (m, 4H), 5.85 (s, 1H), 5.78 (s, 1H), 5.46 (d,  $J = 2.0$  Hz, 1H), 5.39 (d,  $J = 2.0$  Hz, 1H), 4.76 (d,  $J = 11.9$  Hz, 1H), 4.72 (d,  $J = 11.9$  Hz, 1H), 4.58 (d,  $J = 11.7$  Hz, 1H), 4.55 (d,  $J = 11.8$  Hz, 1H), 4.39 – 4.35 (m, 4H), 4.32 (dd,  $J = 3.7, 1.5$  Hz, 1H), 4.28 – 4.21 (m, 3H), 4.12 – 4.04 (m, 3H), 4.01 (dd,

$J = 3.2, 1.9$  Hz, 1H), 3.46 (d,  $J = 8.5$  Hz, 1H), 3.02 (d,  $J = 7.7$  Hz, 1H), 2.33 (s, 3H), 2.33 (s, 3H);  $^{13}\text{C}$  NMR (100 MHz,  $\text{CDCl}_3$ )  $\delta$  137.62, 137.56, 137.46, 136.98, 136.73, 132.21, 132.08, 131.51, 131.49, 129.90, 129.87, 129.84, 129.67, 128.68, 128.65, 128.60, 128.53, 128.13, 128.08, 127.99, 127.95, 126.85, 126.66, 104.94, 104.73, 95.02, 94.79, 85.75, 85.48, 82.74, 82.60, 79.50, 79.26, 76.56, 76.04, 72.38, 72.33, 67.23, 66.75, 21.22; HRMS (ESI) Calcd for  $\text{C}_{27}\text{H}_{32}\text{NO}_5\text{S}$   $[\text{M} + \text{NH}_4]^+$ : 482.1996, found: 482.1992.

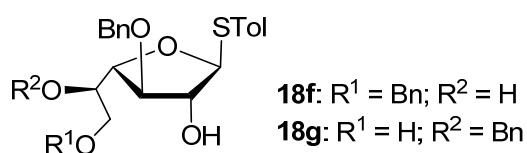

***p*-Tolyl 3,6-di-*O*-benzyl-1-thio- $\beta$ -D-galactofuranoside (18f) and *p*-Tolyl 3,5-di-*O*-benzyl-1-thio- $\beta$ -D-galactofuranoside (18g):** To a solution of **18e** (15.0 g, 32.3 mmol) in anhydrous  $\text{CH}_2\text{Cl}_2$  (65 mL) charged with argon gas was added DIBAL-H (65 mL, 96.6 mmol, 1.5 M in toluene) at  $-40$  °C. After stirring for 24 h at the same temperature, the reaction mixture was allowed to warm to room temperature, quenched with a saturated aqueous  $\text{NH}_4\text{Cl}$  solution, and filtered. Then the aqueous layer was extracted by  $\text{CH}_2\text{Cl}_2$  ( $2 \times 150$  mL), the combined organic layer was dried over  $\text{Na}_2\text{SO}_4$ , filtered, and concentrated to give a crude residue, which was purified by column chromatography on silica gel ( $\text{CH}_2\text{Cl}_2/\text{CH}_3\text{OH}$ , 100:1) to afford **18f** (4.2 g, 28%) and **18g** (9.0 g, 60%) as colorless syrup.

For compound **18f**:  $R_f = 0.30$  ( $\text{CH}_2\text{Cl}_2/\text{CH}_3\text{OH}$ , 30:1);  $[\alpha]_D^{30} -188.9$  ( $c$  5.2,  $\text{CH}_2\text{Cl}_2$ );  $^1\text{H}$  NMR (400 MHz,  $\text{CDCl}_3$ )  $\delta$  7.39 – 7.28 (m, 12H, Ar), 7.09 (d,  $J = 9.0$  Hz, 2H, Ar), 5.44 (s, 1H, H-1), 4.74 (d,  $J = 12.0$  Hz, 1H,  $\text{PhCH}_2$ ), 4.59 – 4.51 (m, 3H,  $\text{PhCH}_2$ ), 4.35 (dt,  $J = 9.8, 1.5$  Hz, 1H, H-2), 4.30 (t,  $J = 1.4$  Hz, 1H, H-3), 4.04 – 4.04 (m, 1H, H-4), 4.00 – 3.95 (m, 1H, H-5), 3.79 (d,  $J = 9.8$  Hz, 1H, -OH), 3.65 – 3.57 (m, 2H, H-6a, H-6b), 2.80 (dd,  $J = 3.3, 1.2$  Hz, 1H, -OH), 2.32 (s, 3H, tolyl  $\text{CH}_3$ );  $^{13}\text{C}$  NMR (100 MHz,  $\text{CDCl}_3$ )  $\delta$  137.78 (Ar), 137.69 (Ar), 137.32 (Ar), 131.94 (Ar), 131.91 (Ar), 129.82 (Ar), 128.67 (Ar), 128.09 (Ar), 128.06 (Ar), 127.97 (Ar), 127.96 (Ar), 95.50 (C-1), 85.84 (C-4), 83.53 (C-3), 79.14 (C-2), 73.67 ( $\text{PhCH}_2$ ), 72.28 ( $\text{PhCH}_2$ ), 71.54

(C-6), 70.55 (C-5), 21.22 (tolyl CH<sub>3</sub>); HRMS (ESI) Calcd for C<sub>27</sub>H<sub>34</sub>NO<sub>5</sub>S [M + NH<sub>4</sub>]<sup>+</sup>: 484.2152, found: 484.2148.

For compound **18g**:  $R_f = 0.35$  (CH<sub>2</sub>Cl<sub>2</sub>/CH<sub>3</sub>OH, 30:1);  $[\alpha]_D^{30} -196.7$  ( $c$  1.9, CH<sub>2</sub>Cl<sub>2</sub>); <sup>1</sup>H NMR (400 MHz, CDCl<sub>3</sub>)  $\delta$  7.38 – 7.26 (m, 12H, Ar), 7.09 (d,  $J = 7.9$  Hz, 2H, Ar), 5.43 (s, 1H, H-1), 4.71 – 4.67 (m, 2H, PhCH<sub>2</sub>), 4.51 – 4.47 (m, 3H, H-4, PhCH<sub>2</sub>), 4.30 (d,  $J = 9.6$  Hz, 1H, H-2), 3.93 (d,  $J = 3.2$  Hz, 1H), 3.90 – 3.81 (m, 2H, H-6a, H-6b), 3.65 (d,  $J = 9.8$  Hz, 1H, -OH), 3.60 (dd,  $J = 7.3, 4.1$  Hz, 1H, H-5), 2.3 – 2.31 (m, 4H, -OH, tolyl CH<sub>3</sub>); <sup>13</sup>C NMR (100 MHz, CDCl<sub>3</sub>)  $\delta$  137.56 (Ar), 137.53 (Ar), 137.07 (Ar), 132.13 (Ar), 131.55 (Ar), 129.88 (Ar), 128.80 (Ar), 128.67 (Ar), 128.55 (Ar), 128.48 (Ar), 128.11 (Ar), 128.08 (Ar), 95.32 (C-1), 85.32 (C-3), 85.10 (C-4), 79.33 (C-2), 77.06 (C-5), 72.51 (PhCH<sub>2</sub>), 72.25 (PhCH<sub>2</sub>), 62.00 (C-6), 21.23 (tolyl CH<sub>3</sub>); HRMS (ESI) Calcd for C<sub>27</sub>H<sub>34</sub>NO<sub>5</sub>S [M + NH<sub>4</sub>]<sup>+</sup>: 484.2152, found: 484.2144.

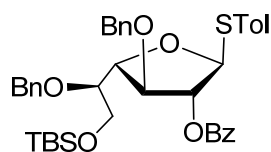

***p*-Tolyl 2-*O*-benzoyl-3,5-di-*O*-benzyl-6-*O*-*tert*-butyldimethylsilyl-1-thio- $\beta$ -D-**

**galactofuranoside (18)**: To a solution of **18g** (6.5 g, 13.9 mmol) and imidazole (2.8 g, 41.7 mmol) in anhydrous CH<sub>2</sub>Cl<sub>2</sub> (30 mL) was added TBSCl (2.3 g, 15.3 mmol) at 0 °C, the mixture was stirred for 2 h at the same temperature. When TLC indicated the disappearance of **18g**, pyridine (11.2 mL, 139.3 mmol) and BzCl (1.9 mL, 16.7 mmol) was then added. The resulting solution was stirred overnight at room temperature, and quenched with CH<sub>3</sub>OH (5 mL) and stirred for another 30 min. The solvent was removed under reduced pressure, and the residue was purified by column chromatography on silica gel (petroleum ether/acetone, 200:1) to afford **18** (8.3 g, 87% for two steps) as colorless syrup.  $R_f = 0.46$  (petroleum ether/ethyl acetate, 8:1);  $[\alpha]_D^{30} -107.7$  ( $c$  1.9, CH<sub>2</sub>Cl<sub>2</sub>); <sup>1</sup>H NMR (400 MHz, CDCl<sub>3</sub>)  $\delta$  7.98 – 7.96 (m, 2H, Ar), 7.57 (t,  $J = 7.5$  Hz, 1H, Ar), 7.42 – 7.38 (m, 4H, Ar), 7.32 – 7.28 (m, 4H, Ar), 7.25 – 7.14 (m, 6H, Ar), 7.07 (d,  $J = 8.0$  Hz, 2H, Ar), 5.64 (s, 1H, H-1), 5.48 (t,  $J = 1.6$  Hz, 1H, H-2), 4.72 (d,  $J = 12.0$  Hz, 1H, PhCH<sub>2</sub>), 4.68 (d,  $J = 11.5$  Hz, 1H, PhCH<sub>2</sub>), 4.51 (dd,  $J = 6.2,$

2.5 Hz, 1H, H-4), 4.42 (d,  $J = 12.0$  Hz, 1H, PhCH<sub>2</sub>), 4.34 (d,  $J = 11.6$  Hz, 1H, PhCH<sub>2</sub>), 4.11 (d,  $J = 6.0$  Hz, 1H, H-3), 3.82 (dd,  $J = 10.3, 6.7$  Hz, 1H, H-6a), 3.77 (dd,  $J = 10.3, 5.8$  Hz, 1H, H-6b), 3.64 (td,  $J = 6.1, 2.6$  Hz, 1H, H-5), 2.31 (s, 3H, tolyl CH<sub>3</sub>), 0.89 (s, 9H, *t*-Bu), 0.04 (s, 6H, Me); <sup>13</sup>C NMR (100 MHz, CDCl<sub>3</sub>) δ 165.60 (C=O), 138.45 (Ar), 137.75 (Ar), 137.53 (Ar), 133.47 (Ar), 132.44 (Ar), 130.70 (Ar), 129.99 (Ar), 129.70 (Ar), 129.57 (Ar), 128.59 (Ar), 128.55 (Ar), 128.36 (Ar), 128.29 (Ar), 128.02 (Ar), 127.76 (Ar), 91.34 (C-1), 83.06 (C-3), 82.82 (C-2), 81.83 (C-4), 78.33 (C-5), 73.92 (PhCH<sub>2</sub>), 72.45 (PhCH<sub>2</sub>), 63.38 (C-6), 26.06 (*t*-Bu), 21.23 (tolyl CH<sub>3</sub>), 18.40 (*t*-Bu), -5.25 (CH<sub>3</sub>), -5.28 (CH<sub>3</sub>); HRMS (ESI) Calcd for C<sub>40</sub>H<sub>52</sub>NO<sub>6</sub>SSi [M + NH<sub>4</sub>]<sup>+</sup>: 702.3279, found: 702.3279.

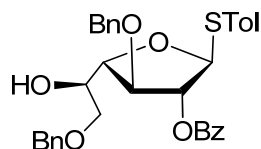

***p*-Tolyl 2-*O*-benzoyl-3,6-di-*O*-benzyl-1-thio-β-*D*-galactofuranoside (19):** To a solution of **18f** (6.9 g, 14.8 mmol) in anhydrous pyridine (50 mL) was added Bz<sub>2</sub>O (4.0 g, 17.8 mmol) and a catalytic amount of DMAP (18 mg, 0.15 mmol). After stirring for 4 h at the room temperature, the solution was quenched with CH<sub>3</sub>OH (5 mL) and stirred for another 30 min. The reaction mixture was then concentrated and the residue was purified by column chromatography on silica gel (petroleum ether/acetone, 12:1) to give a crude product, which was further purified by column chromatography on silica gel (CH<sub>2</sub>Cl<sub>2</sub>) to afford **19** (5.3 g, 63%) as colorless syrup.  $R_f = 0.39$  (petroleum ether/ethyl acetate, 3:1);  $[\alpha]_D^{30} -132.7$  ( $c$  2.2, CH<sub>2</sub>Cl<sub>2</sub>); <sup>1</sup>H NMR (400 MHz, CDCl<sub>3</sub>) δ 8.02 – 8.00 (m, 2H, Ar), 7.58 (t,  $J = 7.4$  Hz, 1H, Ar), 7.46 – 7.40 (m, 4H, Ar), 7.36 – 7.26 (m, 10H, Ar), 7.09 (d,  $J = 8.0$  Hz, 2H, Ar), 5.60 (s, 1H, H-1), 5.53 (t,  $J = 1.6$  Hz, 1H, H-2), 4.81 (d,  $J = 11.9$  Hz, 1H, PhCH<sub>2</sub>), 4.61 (d,  $J = 11.9$  Hz, 1H, PhCH<sub>2</sub>), 4.54 (d,  $J = 12.0$  Hz, 1H, PhCH<sub>2</sub>), 4.50 (d,  $J = 12.0$  Hz, 1H, PhCH<sub>2</sub>), 4.46 (dd,  $J = 5.8, 3.4$  Hz, 1H, H-4), 4.25 (d,  $J = 5.8$  Hz, 1H, H-3), 4.00 – 3.95 (m, 1H, H-5), 3.59 – 3.50 (m, 2H, H-6a, H-6b), 2.32 (s, 3H, tolyl CH<sub>3</sub>), 2.30 (d,  $J = 6.5$  Hz, 1H, -OH); <sup>13</sup>C NMR (100 MHz, CDCl<sub>3</sub>) δ 165.51 (C=O), 138.01 (Ar), 137.96 (Ar),



137.50 (Ar), 133.63 (Ar), 132.99 (Ar), 130.31 (Ar), 129.94 (Ar), 129.85 (Ar), 129.40 (Ar), 128.63 (Ar), 128.58 (Ar), 128.14 (Ar), 128.07 (Ar), 127.90 (Ar), 127.85 (Ar), 91.78 (C-1), 83.35 (C-3), 82.53 (C-4), 82.15 (C-2), 73.62 (PhCH<sub>2</sub>), 72.65 (PhCH<sub>2</sub>), 71.68 (C-6), 69.75 (C-5), 21.26 (tolyl CH<sub>3</sub>); HRMS (ESI) Calcd for C<sub>34</sub>H<sub>38</sub>NO<sub>6</sub>S [M + NH<sub>4</sub>]<sup>+</sup>: 588.2414, found: 588.2424.

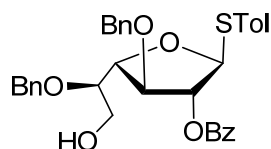

***p*-Tolyl 2-*O*-benzoyl-3,5-di-*O*-benzyl-1-thio- $\beta$ -D-galactofuranoside (20):** To a solution of **18** (2.0 g, 2.92 mmol) in THF (10 mL) and H<sub>2</sub>O (1 mL) was added 70% HF-pyridine (1 mL) at 0 °C, the resulting mixture was warmed to 35 °C and stirred for 4 h. Then the reaction solution was quenched with a saturated aqueous NaHCO<sub>3</sub> solution (40 mL), and extracted with EtOAc (2 × 60 mL). The combined organic layer, after being washed with 0.1 N HCl (2 × 40 mL), saturated aqueous NaHCO<sub>3</sub> solution (50 mL) and brine (40 mL), was dried over Na<sub>2</sub>SO<sub>4</sub>, filtered, and concentrated. The residue was purified by column chromatography on silica gel (petroleum ether/acetone, 6:1) to afford **20** (1.6 g, 96%) as colorless syrup. *R*<sub>f</sub> = 0.41 (petroleum ether/ethyl acetate, 2:1); [α]<sub>D</sub><sup>30</sup> -126.4 (*c* 2.2, CH<sub>2</sub>Cl<sub>2</sub>); <sup>1</sup>H NMR (400 MHz, CDCl<sub>3</sub>) δ 8.01 (d, *J* = 8.2 Hz, 2H, Ar), 7.59 (t, *J* = 7.4 Hz, 1H, Ar), 7.45 – 7.26 (m, 9H, Ar), 7.23 – 7.21 (m, 5H, Ar), 7.10 (d, *J* = 8.1 Hz, 2H, Ar), 5.63 (s, 1H, H-1), 5.50 (d, *J* = 1.4 Hz, 1H, H-2), 4.79 (d, *J* = 11.8 Hz, 1H, PhCH<sub>2</sub>), 4.61 – 4.58 (m, 2H, H-4, PhCH<sub>2</sub>), 4.50 (d, *J* = 11.6 Hz, 2H, PhCH<sub>2</sub>), 4.16 (d, *J* = 6.1 Hz, 1H, H-3), 3.80 – 3.69 (m, 3H, H-6a, H-6b, H-5), 2.31 (s, 3H, tolyl CH<sub>3</sub>), 2.03 (br s, 1H, -OH); <sup>13</sup>C NMR (100 MHz, CDCl<sub>3</sub>) δ 165.55 (C=O), 138.12 (Ar), 138.05 (Ar), 137.29 (Ar), 133.63 (Ar), 132.99 (Ar), 130.13 (Ar), 129.95 (Ar), 129.88 (Ar), 129.39 (Ar), 128.66 (Ar), 128.61 (Ar), 128.51 (Ar), 128.38 (Ar), 128.18 (Ar), 128.11 (Ar), 127.93 (Ar), 91.58 (C-1), 83.22 (C-3), 82.93 (C-4), 82.24 (C-2), 77.75 (C-5), 73.09 (PhCH<sub>2</sub>), 72.58 (PhCH<sub>2</sub>), 62.51 (C-6), 21.25 (tolyl CH<sub>3</sub>); HRMS (ESI) Calcd for C<sub>34</sub>H<sub>38</sub>NO<sub>6</sub>S [M + NH<sub>4</sub>]<sup>+</sup>: 588.2414, found: 588.2408.

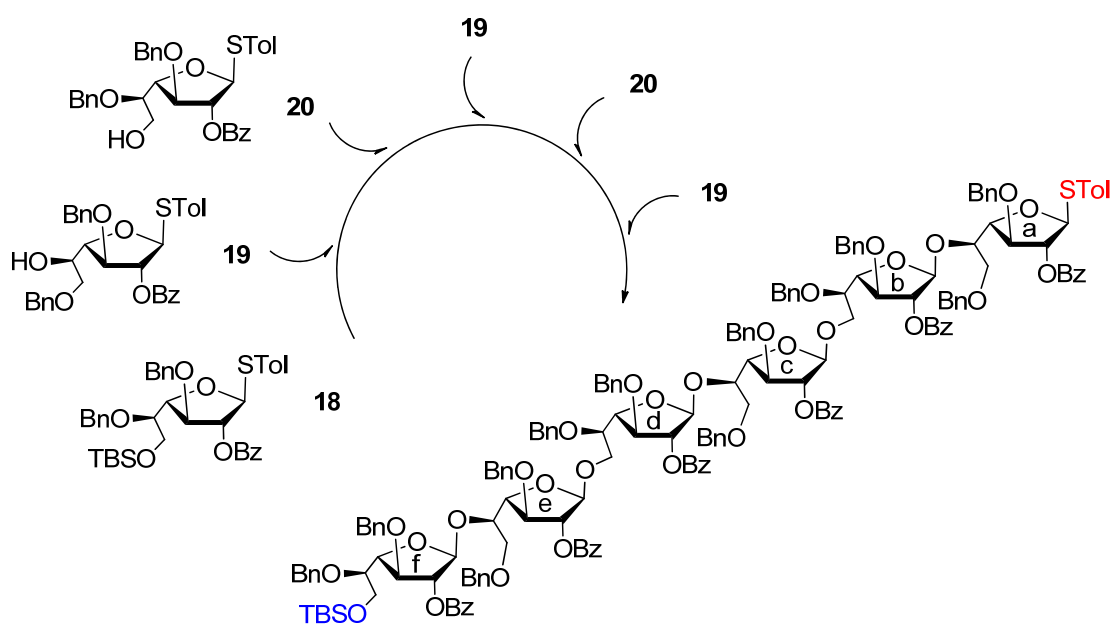

*p*-Tolyl                      2-*O*-benzoyl-3,5-di-*O*-benzyl-6-*O*-*tert*-butyldimethylsilyl- $\beta$ -D-galactofuranosyl<sup>f</sup>-(1 $\rightarrow$ 5)-2-*O*-benzoyl-3,6-di-*O*-benzyl- $\beta$ -D-galactofuranosyl<sup>e</sup>-(1 $\rightarrow$ 6)-2-*O*-benzoyl-3,5-di-*O*-benzyl- $\beta$ -D-galactofuranosyl<sup>d</sup>-(1 $\rightarrow$ 5)-2-*O*-benzoyl-3,6-di-*O*-benzyl- $\beta$ -D-galactofuranosyl<sup>c</sup>-(1 $\rightarrow$ 6)-2-*O*-benzoyl-3,5-di-*O*-benzyl- $\beta$ -D-galactofuranosyl<sup>b</sup>-(1 $\rightarrow$ 5)-2-*O*-benzoyl-3,6-di-*O*-benzyl-1-thio- $\beta$ -D-galactofuranoside<sup>a</sup> (**8**):

A mixture of **18** (550.0 mg, 802.97  $\mu$ mol), TTBP (1.05 g, 4.22 mmol) and freshly activated 4 Å molecular sieves (7.0 g) in anhydrous CH<sub>2</sub>Cl<sub>2</sub> (40 mL) under argon atmosphere was stirred for 20 min at room temperature, and cooled to -78 °C. 5 min later, stoichiometric *p*-TolSCl (110.8  $\mu$ L, 802.97  $\mu$ mol) was added, followed by dropwise addition of AgOTf (4.0 mL, 1.61 mmol, 0.4 mol/L in anhydrous toluene/CH<sub>2</sub>Cl<sub>2</sub>, 3:1). After another 5 min, a solution of **19** (436.4 mg, 764.73  $\mu$ mol) in anhydrous CH<sub>2</sub>Cl<sub>2</sub> (4 mL) was slowly added. The resulting mixture was slowly warmed to room temperature within 2 h and cooled back to -78 °C. 5 min later, stoichiometric *p*-TolSCl (105.5  $\mu$ L, 764.73  $\mu$ mol) was added, followed by dropwise addition of AgOTf (3.8 mL, 1.53 mmol, 0.4 mol/L in anhydrous toluene/CH<sub>2</sub>Cl<sub>2</sub>, 3:1). After another 5 min, a solution of **20** (414.6 mg, 726.49  $\mu$ mol) in anhydrous CH<sub>2</sub>Cl<sub>2</sub> (4 mL) was slowly added. The resulting mixture was stirred at -78 °C for 10 min, warmed to room temperature, and cooled back to -78 °C. 5 min later, stoichiometric *p*-TolSCl (100.2  $\mu$ L, 726.49  $\mu$ mol) was added, followed by dropwise addition of

AgOTf (3.6 mL, 1.45 mmol, 0.4 mol/L in anhydrous toluene/CH<sub>2</sub>Cl<sub>2</sub>, 3:1). After another 5 min, a solution of **19** (366.6 mg, 642.37 μmol) in anhydrous CH<sub>2</sub>Cl<sub>2</sub> (4 mL) was slowly added. The resulting mixture was slowly warmed to room temperature within 2 h and cooled back to -78 °C. 5 min later, stoichiometric *p*-TolSCL (88.6 μL, 642.37 μmol) was added, followed by dropwise addition of AgOTf (3.2 mL, 1.28 mmol, 0.4 mol/L in anhydrous toluene/CH<sub>2</sub>Cl<sub>2</sub>, 3:1). After another 5 min, a solution of **20** (331.7 mg, 581.19 μmol) in anhydrous CH<sub>2</sub>Cl<sub>2</sub> (4 mL) was slowly added. The resulting mixture was stirred at -78 °C for 10 min, warmed to room temperature, and cooled back to -78 °C. 5 min later, stoichiometric *p*-TolSCL (80.2 μL, 581.19 μmol) was added, followed by dropwise addition of AgOTf (2.9 mL, 1.16 mmol, 0.4 mol/L in anhydrous toluene/CH<sub>2</sub>Cl<sub>2</sub>, 3:1). After another 5 min, a solution of **19** (392.8 mg, 688.26 μmol) in anhydrous CH<sub>2</sub>Cl<sub>2</sub> (0.6 mL) was slowly added. The resulting mixture was slowly warmed to room temperature within 2 h, quenched with Et<sub>3</sub>N (1 mL) and filtered through Celite. After removal of the solvent, the desired product was purified by column chromatography on silica gel (petroleum ether/ethyl acetate, 5:1) to afford **8** (1.07 g, 63%) as white foam. *R*<sub>f</sub> = 0.36 (petroleum ether/ethyl acetate, 3:1); [α]<sub>D</sub><sup>30</sup> -72.2 (*c* 1.8, CH<sub>2</sub>Cl<sub>2</sub>); <sup>1</sup>H NMR (600 MHz, CDCl<sub>3</sub>) δ 8.00 – 7.93 (m, 12H, Ar), 7.58 – 6.96 (m, 82H, Ar), 5.62 (s, 1H, H-1<sup>f</sup>), 5.58 (br s, 2H, H-1<sup>a,d</sup>), 5.51 (s, 1H, H-1<sup>b</sup>), 5.48 (br s, 3H, H-2<sup>a,d,f</sup>), 5.44 (s, 1H, H-2<sup>b</sup>), 5.34 (s, 1H, H-2<sup>e</sup>), 5.32 (d, *J* = 1.0 Hz, 1H, H-2<sup>c</sup>), 5.04 (br s, 2H, H-1<sup>c,e</sup>), 4.72 – 4.52 (m, 13H, PhCH<sub>2</sub>, H-4<sup>a</sup>), 4.43 (t, *J* = 11.8 Hz, 2H, PhCH<sub>2</sub>), 4.37 – 4.22 (m, 17H, PhCH<sub>2</sub>, H-3<sup>a,c,e</sup>, H-4<sup>b,c,e,f</sup>, H-5<sup>a,c,e</sup>), 4.20 – 4.15 (m, 4H, H-4<sup>d</sup>, H-5<sup>a,c,e</sup>), 4.02 – 3.99 (m, 3H, H-3<sup>b,d,f</sup>), 3.82 – 3.58 (m, 14H, H-5<sup>b,d</sup>, H-6<sup>a,b,c,d,e,f</sup>), 3.48 – 3.46 (m, 1H, H-5<sup>f</sup>), 2.25 (s, 3H, tolyl CH<sub>3</sub>), 0.79 (s, 9H, *t*-Bu), -0.09 (s, 3H, CH<sub>3</sub>), -0.11 (s, 3H, CH<sub>3</sub>); <sup>13</sup>C NMR (150 MHz, CDCl<sub>3</sub>) δ 165.53 (C=O), 165.51 (C=O), 165.48 (C=O), 165.43 (C=O), 165.37 (C=O), 165.33 (C=O), 138.54 (Ar), 138.47 (Ar), 138.41 (Ar), 138.17 (Ar), 138.09 (Ar), 138.04 (Ar), 137.91 (Ar), 137.82 (Ar), 137.80 (Ar), 137.67 (Ar), 133.47 (Ar), 133.35 (Ar), 133.33 (Ar), 133.31 (Ar), 132.80 (Ar), 130.45 (Ar), 129.99 (Ar), 129.96 (Ar), 129.95 (Ar), 129.78 (Ar), 129.69 (Ar), 129.64 (Ar), 129.62 (Ar), 129.57 (Ar), 129.54 (Ar), 129.41 (Ar), 128.60 (Ar), 128.58 (Ar), 128.54 (Ar), 128.53 (Ar), 128.48 (Ar), 128.42 (Ar), 128.39 (Ar),

128.37 (Ar), 128.31 (Ar), 128.29 (Ar), 128.28 (Ar), 128.20 (Ar), 128.15 (Ar), 128.13 (Ar), 127.96 (Ar), 127.91 (Ar), 127.81 (Ar), 127.76 (Ar), 127.71 (Ar), 127.54 (Ar), 127.45 (Ar), 127.42 (Ar), 127.37 (Ar), 107.04 (C-1<sup>c</sup>), 107.00 (C-1<sup>e</sup>), 106.85 (C-1<sup>f</sup>), 106.62 (C-1<sup>d</sup>), 106.24 (C-1<sup>b</sup>), 91.18 (C-1<sup>a</sup>), 84.00 (C-3<sup>e</sup>), 83.81 (C-3<sup>c</sup>), 83.79 (C-4<sup>d</sup>), 83.57 (C-3<sup>a</sup>), 83.46 (×2, C-4<sup>b,f</sup>), 83.31 (C-3), 83.26 (×2, C-3), 83.75 (C-4<sup>e</sup>), 82.53 (C-4<sup>c</sup>), 82.42 (C-2<sup>c</sup>), 82.31 (C-2), 82.28 (C-2), 82.18 (C-2), 82.05 (×2, C-4<sup>a</sup>, C-2), 81.98 (C-2), 78.91 (C-5<sup>f</sup>), 77.08 (C-5<sup>d</sup>), 76.76 (C-5<sup>b</sup>), 74.20 (C-5<sup>a</sup>), 74.12 (C-5<sup>e</sup>), 74.11 (PhCH<sub>2</sub>), 73.98 (PhCH<sub>2</sub>), 73.92 (PhCH<sub>2</sub>), 73.76 (C-5<sup>c</sup>), 73.52 (×2, PhCH<sub>2</sub>), 73.35 (PhCH<sub>2</sub>), 72.98 (PhCH<sub>2</sub>), 72.87 (PhCH<sub>2</sub>), 72.68 (PhCH<sub>2</sub>), 72.18 (PhCH<sub>2</sub>), 72.08 (×2, PhCH<sub>2</sub>), 71.62 (C-6), 71.60 (C-6), 70.73 (C-6<sup>a</sup>), 69.87 (C-6<sup>b</sup>), 69.51 (C-6<sup>d</sup>), 64.77 (C-6<sup>f</sup>), 25.94 (*t*-Bu), 21.21 (tolyl CH<sub>3</sub>), 18.21 (*t*-Bu), -5.35 (×2, CH<sub>3</sub>); HRMS (ESI) Calcd for C<sub>175</sub>H<sub>178</sub>O<sub>36</sub>SSiNa<sub>2</sub> [M + 2Na]<sup>2+</sup>: 1480.5686, found: 1480.5724.

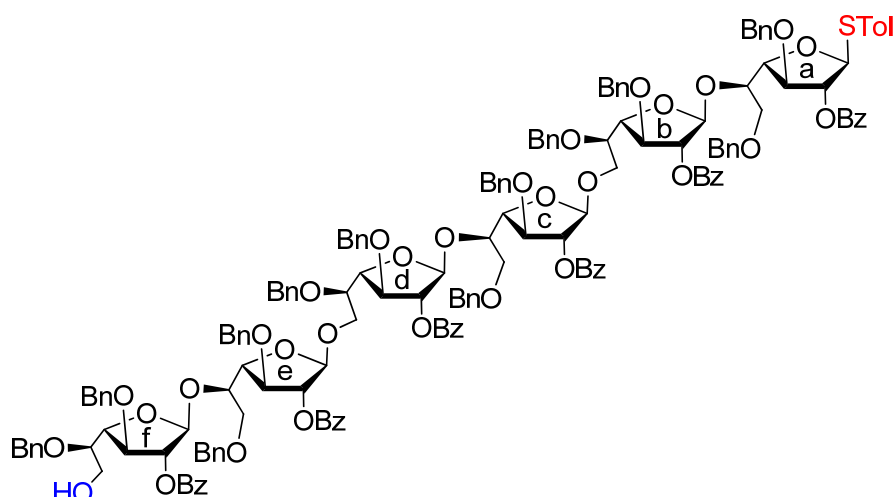

***p*-Tolyl 2-*O*-benzoyl-3,5-di-*O*-benzyl- $\beta$ -D-galactofuranosyl<sup>f</sup>-(1→5)-2-*O*-benzoyl-3,6-di-*O*-benzyl- $\beta$ -D-galactofuranosyl<sup>e</sup>-(1→6)-2-*O*-benzoyl-3,5-di-*O*-benzyl- $\beta$ -D-galactofuranosyl<sup>d</sup>-(1→5)-2-*O*-benzoyl-3,6-di-*O*-benzyl- $\beta$ -D-galactofuranosyl<sup>c</sup>-(1→6)-2-*O*-benzoyl-3,5-di-*O*-benzyl- $\beta$ -D-galactofuranosyl<sup>b</sup>-(1→5)-2-*O*-benzoyl-3,6-di-*O*-benzyl-1-thio- $\beta$ -D-galactofuranoside<sup>a</sup> (5):** To a solution of **8** (1.0 g, 0.343 mmol) in THF (10 mL) and H<sub>2</sub>O (1 mL) was added 70% HF-pyridine (1 mL) at 0 °C, the resulting mixture was warmed to 35 °C and stirred for 4 h. Then the reaction solution was quenched with a saturated aqueous NaHCO<sub>3</sub> solution (30 mL), and extracted with EtOAc (2 × 50 mL). The combined organic layer, after being washed with 0.1 N HCl

(2 × 30 mL), saturated aqueous NaHCO<sub>3</sub> solution (40 mL) and brine (40 mL), was dried over Na<sub>2</sub>SO<sub>4</sub>, filtered, and concentrated. The residue was purified by column chromatography on silica gel (petroleum ether/acetone, 4:1) to afford **5** (0.83 g, 85%) as white foam. *R<sub>f</sub>* = 0.29 (petroleum ether/ethyl acetate, 2:1); [α]<sub>D</sub><sup>30</sup> -79.8 (*c* 1.6, CH<sub>2</sub>Cl<sub>2</sub>); <sup>1</sup>H NMR (600 MHz, CDCl<sub>3</sub>) δ 8.00 – 7.93 (m, 12H, Ar), 7.59 – 6.98 (m, 82H, Ar), 5.58 (br s, 2H, H-1<sup>a</sup>, H-1<sup>d</sup>), 5.55 (s, 1H, H-1<sup>f</sup>), 5.51 (s, 1H, H-1<sup>b</sup>), 5.48 (br s, 3H, H-2<sup>a,d,f</sup>), 5.44 (s, 1H, H-2<sup>b</sup>), 5.33 (s, 1H, H-2<sup>c</sup>), 5.30 (s, 1H, H-2<sup>e</sup>), 5.05 (br s, 2H, H-1<sup>c,e</sup>), 4.73 – 4.66 (m, 5H, PhCH<sub>2</sub>), 4.62 – 4.53 (m, 7H, PhCH<sub>2</sub>, H-4<sup>a</sup>), 4.45 – 4.24 (m, 20H, PhCH<sub>2</sub>, H-3<sup>a,c,e</sup>, H-4<sup>b,c,e,f</sup>), 4.19 – 4.15 (m, 4H, H-4<sup>d</sup>, H-5<sup>a,c,e</sup>), 4.01 (br s, 3H, H-3<sup>b,d,f</sup>), 3.83 – 3.79 (m, 2H, H-6<sup>b,d</sup>), 3.73 – 3.59 (m, 11H, H-5<sup>b,d</sup>, H-6<sup>a,b,c,d,e,f</sup>), 3.53 (dd, *J* = 11.0, 4.8 Hz, 1H, H-6<sup>f</sup>), 3.433 – 3.427 (m, 1H, H-5<sup>f</sup>), 2.25 (s, 3H, tolyl CH<sub>3</sub>), 2.02 (br s, 1H, -OH); <sup>13</sup>C NMR (150 MHz, CDCl<sub>3</sub>) δ 165.55 (C=O), 165.52 (C=O), 165.44 (C=O), 165.43 (C=O), 165.36 (C=O), 165.32 (C=O), 138.46 (Ar), 138.43 (Ar), 138.17 (Ar), 138.16 (Ar), 138.12 (Ar), 138.09 (Ar), 137.96 (Ar), 137.84 (Ar), 137.81 (Ar), 137.67 (Ar), 137.57 (Ar), 133.47 (Ar), 133.43 (Ar), 133.35 (Ar), 133.32 (Ar), 132.80 (Ar), 130.44 (Ar), 129.99 (Ar), 129.95 (Ar), 129.78 (Ar), 129.65 (Ar), 129.62 (Ar), 129.54 (Ar), 129.53 (Ar), 129.41 (Ar), 128.58 (Ar), 128.49 (Ar), 128.42 (Ar), 128.39 (Ar), 128.37 (Ar), 128.35 (Ar), 128.33 (Ar), 128.31 (Ar), 128.28 (Ar), 128.20 (Ar), 128.15 (Ar), 128.04 (Ar), 128.01 (Ar), 127.95 (Ar), 127.81 (Ar), 127.79 (Ar), 127.77 (Ar), 127.74 (Ar), 127.70 (Ar), 127.54 (Ar), 127.50 (Ar), 127.45 (Ar), 127.41 (Ar), 107.04 (C-1<sup>c</sup>), 106.77 (C-1<sup>f</sup>), 106.72 (C-1<sup>e</sup>), 106.66 (C-1<sup>d</sup>), 106.25 (C-1<sup>b</sup>), 91.18 (C-1<sup>a</sup>), 83.89 (C-3<sup>c</sup>), 83.69, 83.66, 83.57, 83.43, 83.25 (×2, C-3), 82.94, 82.93, 82.84 (C-4), 82.60 (C-4<sup>b</sup>), 82.40 (C-2<sup>c</sup>), 82.28 (C-2), 82.13 (C-2), 82.06 (×2, C-4<sup>a</sup>, C-2<sup>b</sup>), 82.01 (C-2), 81.85 (C-2<sup>e</sup>), 77.53 (C-5<sup>f</sup>), 77.07 (C-5<sup>d</sup>), 76.75 (C-5<sup>b</sup>), 74.83 (C-5<sup>e</sup>), 74.22 (C-5<sup>a</sup>), 73.99 (PhCH<sub>2</sub>), 73.95 (PhCH<sub>2</sub>), 73.88 (C-5<sup>c</sup>), 73.52 (PhCH<sub>2</sub>), 73.39 (PhCH<sub>2</sub>), 73.36 (PhCH<sub>2</sub>), 72.92 (PhCH<sub>2</sub>), 72.90 (PhCH<sub>2</sub>), 72.67 (PhCH<sub>2</sub>), 72.59 (PhCH<sub>2</sub>), 72.21 (PhCH<sub>2</sub>), 72.18 (PhCH<sub>2</sub>), 72.07 (PhCH<sub>2</sub>), 71.65 (C-6), 71.47 (C-6), 70.73 (C-6<sup>a</sup>), 69.87 (C-6<sup>b</sup>), 69.41 (C-6<sup>d</sup>), 62.01 (C-6<sup>f</sup>), 21.21 (tolyl CH<sub>3</sub>); HRMS (ESI) Calcd for C<sub>169</sub>H<sub>164</sub>O<sub>36</sub>SNa<sub>2</sub> [M + 2Na]<sup>2+</sup>: 1423.5254, found: 1423.5251.

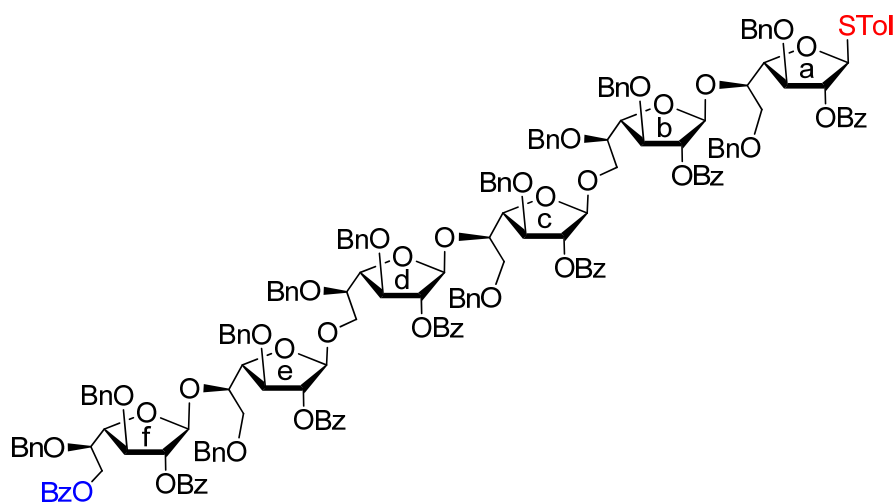

*p*-Tolyl 2,6-di-*O*-benzoyl-3,5-di-*O*-benzyl- $\beta$ -D-galactofuranosyl<sup>f</sup>-(1 $\rightarrow$ 5)-2-*O*-benzoyl-3,6-di-*O*-benzyl- $\beta$ -D-galactofuranosyl<sup>e</sup>-(1 $\rightarrow$ 6)-2-*O*-benzoyl-3,5-di-*O*-benzyl- $\beta$ -D-galactofuranosyl<sup>d</sup>-(1 $\rightarrow$ 5)-2-*O*-benzoyl-3,6-di-*O*-benzyl- $\beta$ -D-galactofuranosyl<sup>c</sup>-(1 $\rightarrow$ 6)-2-*O*-benzoyl-3,5-di-*O*-benzyl- $\beta$ -D-galactofuranosyl<sup>b</sup>-(1 $\rightarrow$ 5)-2-*O*-benzoyl-3,6-di-*O*-benzyl-1-thio- $\beta$ -D-galactofuranoside<sup>a</sup> (**4**): To a solution of **5** (540 mg, 0.193 mmol) in anhydrous CH<sub>2</sub>Cl<sub>2</sub> (10 mL) was added pyridine (310  $\mu$ L, 3.853 mmol), Bz<sub>2</sub>O (218 mg, 0.964 mmol) and a catalytic amount of DMAP (2.5 mg, 0.02 mmol), the reaction mixture was refluxed overnight. Then the reaction was quenched with CH<sub>3</sub>OH (100  $\mu$ L) and stirred for another 30 min. After removal of the solvent, the residue was dissolved in EtOAc (60 mL), washed with 0.1 N HCl (30 mL), saturated aqueous NaHCO<sub>3</sub> solution (30 mL) and brine (30 mL). The organic layer was dried over Na<sub>2</sub>SO<sub>4</sub>, filtered, and concentrated. The residue was purified by column chromatography on silica gel (petroleum ether/acetone, 4.5:1) to afford **4** (536 mg, 96%) as white foam.  $R_f$  = 0.39 (petroleum ether/ethyl acetate, 2:1);  $[\alpha]_D^{30}$  -67.8 (*c* 1.2, CH<sub>2</sub>Cl<sub>2</sub>); <sup>1</sup>H NMR (600 MHz, CDCl<sub>3</sub>)  $\delta$  8.00 – 7.93 (m, 12H, Ar), 7.86 (d, *J* = 7.3 Hz, 2H, Ar), 7.57 – 6.97 (m, 85H, Ar), 5.62 (s, 1H, H-1<sup>f</sup>), 5.58 (br s, 2H, H-1<sup>a</sup>, H-1<sup>d</sup>), 5.513 – 5.509 (m, 2H, H-2<sup>f</sup>, H-1<sup>b</sup>), 5.48 (br s, 2H, H-2<sup>a</sup>, H-2<sup>d</sup>), 5.44 (s, 1H, H-2<sup>b</sup>), 5.32 (d, *J* = 1.0 Hz, 2H, H-2<sup>c,e</sup>), 5.052 (s, 1H, H-1<sup>e</sup>), 5.047 (s, 1H, H-1<sup>c</sup>), 4.72 – 4.67 (m, 5H, PhCH<sub>2</sub>), 4.64 – 4.52 (m, 8H, PhCH<sub>2</sub>, H-4<sup>a</sup>), 4.43 – 4.27 (m, 19H, PhCH<sub>2</sub>, H-6<sup>f</sup>, H-3<sup>a,c,e</sup>, H-4<sup>f</sup>, H-4<sup>c</sup>/H-4<sup>e</sup>), 4.24 – 4.15 (m, 6H, H-4<sup>b,d</sup>, H-4<sup>c</sup>/H-4<sup>e</sup>), 4.07 (d, *J* = 5.6 Hz, 1H, H-3<sup>f</sup>), 4.02 – 4.00 (m, 2H, H-3<sup>b</sup>, H-3<sup>d</sup>), 3.83 – 3.77 (m, 2H, H-6<sup>b,d</sup>), 3.75 – 3.58 (m, 11H, H-5<sup>b,d,f</sup>, H-6<sup>a,b,c,d,e,f</sup>), 2.25 (s, 3H, tolyl CH<sub>3</sub>); <sup>13</sup>C NMR (150 MHz, CDCl<sub>3</sub>)  $\delta$

166.19 (C=O), 165.53 (C=O), 165.52 (C=O), 165.45 (C=O), 165.44 (C=O), 165.35 (C=O), 165.33 (C=O), 138.47 (Ar), 138.18 (Ar), 138.17 (Ar), 138.11 (Ar), 138.04 (Ar), 137.89 (Ar), 137.84 (Ar), 137.81 (Ar), 137.68 (Ar), 137.64 (Ar), 133.48 (Ar), 133.37 (Ar), 133.34 (Ar), 133.06 (Ar), 132.80 (Ar), 130.46 (Ar), 129.99 (Ar), 129.96 (Ar), 129.78 (Ar), 129.67 (Ar), 129.63 (Ar), 129.57 (Ar), 129.55 (Ar), 129.41 (Ar), 128.60 (Ar), 128.57 (Ar), 128.49 (Ar), 128.45 (Ar), 128.42 (Ar), 128.40 (Ar), 128.37 (Ar), 128.33 (Ar), 128.31 (Ar), 128.28 (Ar), 128.26 (Ar), 128.20 (Ar), 128.17 (Ar), 128.15 (Ar), 128.09 (Ar), 127.96 (Ar), 127.94 (Ar), 127.91 (Ar), 127.88 (Ar), 127.81 (Ar), 127.76 (Ar), 127.71 (Ar), 127.65 (Ar), 127.55 (Ar), 127.50 (Ar), 127.44 (Ar), 127.42 (Ar), 127.39 (Ar), 107.05 (C-1<sup>c</sup>), 106.93 (C-1<sup>e</sup>), 106.74 (C-1<sup>f</sup>), 106.63 (C-1<sup>d</sup>), 106.25 (C-1<sup>b</sup>), 91.18 (C-1<sup>a</sup>), 83.84, 83.79, 83.71, 83.58, 83.46, 83.36 (C-3), 83.26, 83.25, 82.97 (C-3<sup>f</sup>), 82.78, 82.56, 82.42 (C-2), 82.29 (C-2), 82.18 (C-2), 82.06 (×2, C-4<sup>a</sup>, C-2), 82.01 (×2, C-2), 76.77 (C-5<sup>b</sup>), 75.91 (C-5<sup>f</sup>), 74.24 (C-5<sup>e</sup>), 74.21 (C-5<sup>a</sup>), 73.99 (PhCH<sub>2</sub>), 73.94 (PhCH<sub>2</sub>), 73.79 (C-5<sup>c</sup>), 73.52 (PhCH<sub>2</sub>), 73.44 (PhCH<sub>2</sub>), 73.40 (PhCH<sub>2</sub>), 73.37 (PhCH<sub>2</sub>), 72.89 (PhCH<sub>2</sub>), 72.71 (PhCH<sub>2</sub>), 72.68 (PhCH<sub>2</sub>), 72.18 (PhCH<sub>2</sub>), 72.11 (PhCH<sub>2</sub>), 72.10 (PhCH<sub>2</sub>), 71.64 (C-6), 71.57 (C-6), 70.74 (C-6<sup>a</sup>), 69.87 (C-6<sup>b</sup>), 69.50 (C-6<sup>d</sup>), 64.92 (C-6<sup>f</sup>), 21.22 (tolyl CH<sub>3</sub>); HRMS (ESI) Calcd for C<sub>176</sub>H<sub>168</sub>O<sub>37</sub>SNa<sub>2</sub> [M + 2Na]<sup>2+</sup>: 1475.5385, found: 1475.5365.

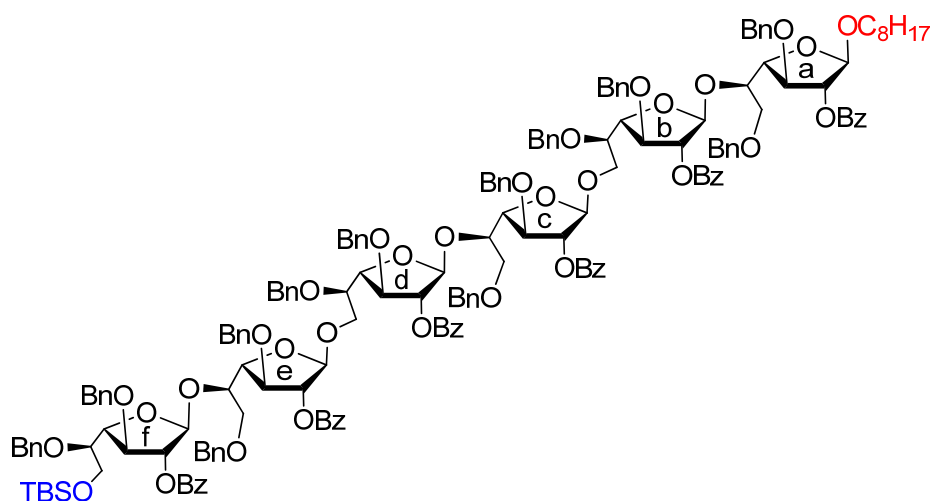

**Octyl**                      **2-O-benzoyl-3,5-di-O-benzyl-6-O-tert-butylidimethylsilyl<sup>f</sup>-β-D-galactofuranosyl-(1→5)-2-O-benzoyl-3,6-di-O-benzyl-β-D-galactofuranosyl<sup>e</sup>-(1→6)-2-O-benzoyl-3,5-di-O-benzyl-β-D-galactofuranosyl<sup>d</sup>-(1→5)-2-O-benzoyl-3,6-di-**

***O*-benzyl- $\beta$ -D-galactofuranosyl<sup>c</sup>-(1 $\rightarrow$ 6)-2-*O*-benzoyl-3,5-di-*O*-benzyl- $\beta$ -D-galactofuranosyl<sup>b</sup>-(1 $\rightarrow$ 5)-2-*O*-benzoyl-3,6-di-*O*-benzyl- $\beta$ -D-galactofuranoside<sup>a</sup> (**21**):** A mixture of **8** (500 mg, 0.171 mmol), TTBP (51 mg, 0.205 mmol) and freshly activated 4 Å molecular sieves (2.0 g) in anhydrous CH<sub>2</sub>Cl<sub>2</sub> (20 mL) under argon atmosphere was stirred for 20 min at room temperature, and cooled to -78 °C. 5 min later, stoichiometric *p*-TolSCl (23.6  $\mu$ L, 0.171 mmol) was added, followed by dropwise addition of AgOTf (0.86 mL, 0.342 mmol, 0.4 mol/L in anhydrous toluene/CH<sub>2</sub>Cl<sub>2</sub>, 3:1). After another 5 min, 1-octanol (54  $\mu$ L, 0.343 mmol) was added. The reaction mixture was warmed to room temperature in 10 min, quenched with Et<sub>3</sub>N (0.5 mL) and filtered through Celite. After removal of the solvent, the desired product was purified by column chromatography on silica gel (petroleum ether/acetone, 6:1) to afford **21** (457 mg, 91%) as white foam. *R*<sub>f</sub> = 0.44 (petroleum ether/ethyl acetate, 3:1); [ $\alpha$ ]<sub>D</sub><sup>30</sup> -59.4 (*c* 0.9, CH<sub>2</sub>Cl<sub>2</sub>); <sup>1</sup>H NMR (600 MHz, CDCl<sub>3</sub>)  $\delta$  8.02 – 7.92 (m, 12H, Ar), 7.58 – 7.48 (m, 4H, Ar), 7.44 – 6.96 (m, 74H, Ar), 5.62 (s, 1H, H-1<sup>f</sup>), 5.57 (s, 1H, H-1<sup>d</sup>), 5.55 (s, 1H, H-1<sup>b</sup>), 5.48 – 5.47 (m, 3H, H-2<sup>b,d,f</sup>), 5.33 – 5.33 (m, 3H, H-2<sup>a,c,e</sup>), 5.11 (s, 1H, H-1<sup>a</sup>), 5.06 (s, 1H, H-1<sup>c</sup>), 5.04 (s, 1H, H-1<sup>e</sup>), 4.72 – 4.65 (m, 6H, PhCH<sub>2</sub>), 4.62 – 4.52 (m, 6H, PhCH<sub>2</sub>), 4.47 (d, *J* = 12.0 Hz, 1H, PhCH<sub>2</sub>), 4.44 (d, *J* = 12.0 Hz, 1H, PhCH<sub>2</sub>), 4.37 – 4.23 (m, 18H, PhCH<sub>2</sub>, H-3<sup>a,c,e</sup>, H-4<sup>a,b,c,e,f</sup>), 4.19 – 4.14 (m, 4H, H-4<sup>d</sup>, H-5<sup>a,c,e</sup>), 4.01 – 3.99 (m, 3H, H-3<sup>b,d,f</sup>), 3.85 – 3.60 (m, 15H, H-5<sup>b,d</sup>, H-6<sup>a,b,c,d,e,f</sup>, octyl OCH<sub>2</sub>), 3.48 – 3.46 (m, 1H, H-5<sup>f</sup>), 3.41 (dt, *J* = 9.7, 6.5 Hz, 1H, octyl OCH<sub>2</sub>), 1.57 – 1.54 (m, 2H, octyl CH<sub>2</sub>), 1.30 – 1.23 (m, 10H, octyl CH<sub>2</sub>), 0.85 (t, *J* = 6.9 Hz, 3H, octyl CH<sub>3</sub>), 0.79 (s, 9H, *t*-Bu), -0.09 (s, 3H, CH<sub>3</sub>), -0.11 (s, 3H, CH<sub>3</sub>); <sup>13</sup>C NMR (150 MHz, CDCl<sub>3</sub>)  $\delta$  165.68 (C=O), 165.51 (C=O), 165.48 (C=O), 165.42 (C=O), 165.38 (C=O), 165.34 (C=O), 138.54 (Ar), 138.47 (Ar), 138.42 (Ar), 138.22 (Ar), 138.17 (Ar), 138.07 (Ar), 138.05 (Ar), 137.92 (Ar), 137.87 (Ar), 137.82 (Ar), 133.37 (Ar), 133.34 (Ar), 133.32 (Ar), 130.01 (Ar), 130.00 (Ar), 129.97 (Ar), 129.95 (Ar), 129.70 (Ar), 129.66 (Ar), 129.65 (Ar), 129.62 (Ar), 129.58 (Ar), 129.55 (Ar), 128.59 (Ar), 128.58 (Ar), 128.55 (Ar), 128.53 (Ar), 128.42 (Ar), 128.39 (Ar), 128.37 (Ar), 128.33 (Ar), 128.30 (Ar), 128.26 (Ar), 128.21 (Ar), 128.17 (Ar), 128.14 (Ar), 127.98 (Ar), 127.95 (Ar), 127.92 (Ar), 127.81 (Ar), 127.77 (Ar), 127.71 (Ar), 127.53 (Ar),



127.47 (Ar), 127.45 (Ar), 127.43 (Ar), 127.40 (Ar), 127.38 (Ar), 107.04 (C-1<sup>c</sup>), 107.01 (C-1<sup>e</sup>), 106.85 (C-1<sup>f</sup>), 106.59 (C-1<sup>d</sup>), 106.25 (C-1<sup>b</sup>), 106.00 (C-1<sup>a</sup>), 84.01, 83.93, 83.82, 83.79, 83.52, 83.47, 83.31 (C-3), 83.30 (C-3), 83.28 (C-3), 82.76, 82.52, 82.48 (C-2), 82.42 (C-2), 82.32 (C-2), 82.19 (C-2), 82.08 (C-2), 82.00, 81.96, 78.92 (C-5<sup>f</sup>), 77.09 (C-5<sup>d</sup>), 74.13 (C-5<sup>e</sup>), 74.11 (PhCH<sub>2</sub>), 74.00 (C-5<sup>a</sup>), 73.95 (PhCH<sub>2</sub>), 73.94 (PhCH<sub>2</sub>), 73.72 (C-5<sup>c</sup>), 73.50 (PhCH<sub>2</sub>), 73.38 (PhCH<sub>2</sub>), 73.35 (PhCH<sub>2</sub>), 72.99 (PhCH<sub>2</sub>), 72.88 (PhCH<sub>2</sub>), 72.67 (PhCH<sub>2</sub>), 72.13 (PhCH<sub>2</sub>), 72.09 (×2, PhCH<sub>2</sub>), 71.60 (C-6), 71.57 (C-6), 71.06 (C-6<sup>a</sup>), 69.85 (C-6<sup>b</sup>), 69.52 (C-6<sup>d</sup>), 67.64 (octyl OCH<sub>2</sub>), 64.78 (C-6<sup>f</sup>), 31.99 (octyl CH<sub>2</sub>), 29.59 (octyl CH<sub>2</sub>), 29.56 (octyl OCH<sub>2</sub>CH<sub>2</sub>), 29.39 (octyl CH<sub>2</sub>), 26.24 (octyl CH<sub>2</sub>), 25.95 (*t*-Bu), 22.80 (octyl CH<sub>2</sub>), 18.22 (*t*-Bu), 14.25 (octyl CH<sub>3</sub>), -5.35(×2, CH<sub>3</sub>); HRMS (ESI) Calcd for C<sub>176</sub>H<sub>188</sub>O<sub>37</sub>SiNa<sub>2</sub> [M + 2Na]<sup>2+</sup>: 1483.6192, found: 1483.6171.

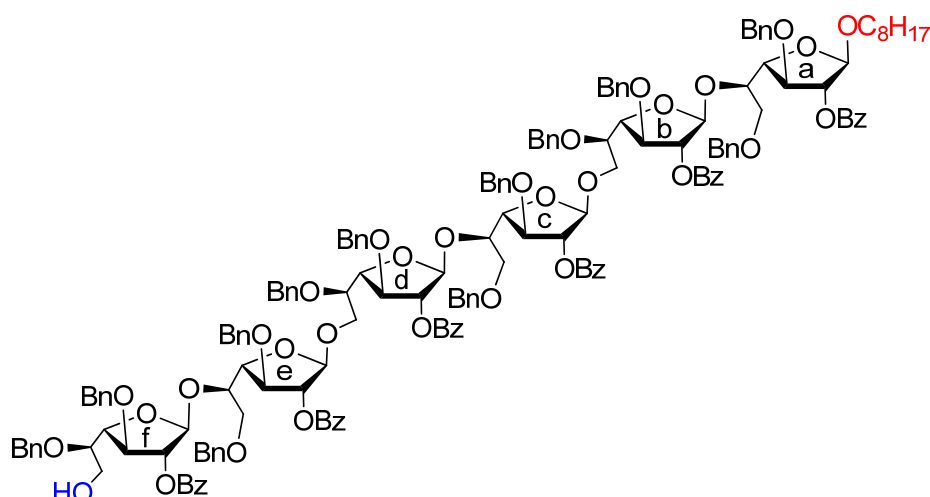

**Octyl 2-*O*-benzoyl-3,5-di-*O*-benzyl- $\beta$ -D-galactofuranosyl<sup>f</sup>-(1→5)-2-*O*-benzoyl-3,6-di-*O*-benzyl- $\beta$ -D-galactofuranosyl<sup>e</sup>-(1→6)-2-*O*-benzoyl-3,5-di-*O*-benzyl- $\beta$ -D-galactofuranosyl<sup>d</sup>-(1→5)-2-*O*-benzoyl-3,6-di-*O*-benzyl- $\beta$ -D-galactofuranosyl<sup>c</sup>-(1→6)-2-*O*-benzoyl-3,5-di-*O*-benzyl- $\beta$ -D-galactofuranosyl<sup>b</sup>-(1→5)-2-*O*-benzoyl-3,6-di-*O*-benzyl- $\beta$ -D-galactofuranoside<sup>a</sup> (6):** To a solution of **21** (440 mg, 0.151 mmol) in THF (10 mL) and H<sub>2</sub>O (1 mL) was added 70% HF-pyridine (1 mL) at 0 °C, the resulting mixture was warmed to 35 °C and stirred for 4 h. Then the reaction solution was quenched with a saturated aqueous NaHCO<sub>3</sub> solution (30 mL), and extracted with EtOAc (2 × 40 mL). The combined organic layer, after being washed with 0.1 N HCl

(2 × 30 mL), saturated aqueous NaHCO<sub>3</sub> solution (30 mL) and brine (30 mL), was dried over Na<sub>2</sub>SO<sub>4</sub>, filtered, and concentrated. The residue was purified by column chromatography on silica gel (petroleum ether/acetone, 4.5:1) to afford **6** (374 mg, 87%) as white foam. *R<sub>f</sub>* = 0.33 (petroleum ether/ethyl acetate, 2:1); [α]<sub>D</sub><sup>30</sup> -61.7 (*c* 1.7, CH<sub>2</sub>Cl<sub>2</sub>); <sup>1</sup>H NMR (600 MHz, CDCl<sub>3</sub>) δ 8.02 – 7.94 (m, 12H, Ar), 7.59 – 7.49 (m, 4H, Ar), 7.44 – 6.97 (m, 74H, Ar), 5.58 (s, 1H, H-1<sup>d</sup>), 5.55 (br s, 2H, H-1<sup>b,f</sup>), 5.49 (br s, 3H, H-2<sup>b,d,f</sup>), 5.34 (s, 1H, H-2<sup>c</sup>), 5.33 (s, 1H, H-2<sup>a</sup>), 5.30 (s, 1H, H-2<sup>e</sup>), 5.11 (s, 1H, H-1<sup>a</sup>), 5.07 (s, 1H, H-1<sup>c</sup>), 5.05 (s, 1H, H-1<sup>e</sup>), 4.73 – 4.66 (m, 5H, PhCH<sub>2</sub>), 4.62 – 4.53 (m, 6H, PhCH<sub>2</sub>), 4.48 – 4.43 (m, 3H, PhCH<sub>2</sub>), 4.38 – 4.24 (m, 18H, PhCH<sub>2</sub>, H-3<sup>a,c,e</sup>, H-4<sup>a,b,c,e,f</sup>), 4.19 – 4.14 (m, 4H, H-4<sup>d</sup>, H-5<sup>a,c,e</sup>), 4.02 – 4.01 (m, 3H, H-3<sup>b,d,f</sup>), 3.86 – 3.80 (m, 2H, H-6<sup>b,d</sup>), 3.76 – 3.59 (m, 12H, H-5<sup>b,d</sup>, H-6<sup>a,b,c,d,e,f</sup>, octyl OCH<sub>2</sub>), 3.54 – 3.51 (m, 1H, H-6<sup>f</sup>), 3.44 – 3.39 (m, 2H, H-5<sup>f</sup>, octyl OCH<sub>2</sub>), 2.02 (br s, 1H, -OH), 1.59 – 1.54 (m, 2H, octyl CH<sub>2</sub>), 1.31 – 1.23 (m, 10H, octyl CH<sub>2</sub>), 0.86 (t, *J* = 6.9 Hz, 3H, octyl CH<sub>3</sub>); <sup>13</sup>C NMR (150 MHz, CDCl<sub>3</sub>) δ 165.67 (C=O), 165.55 (C=O), 165.45 (C=O), 165.40 (C=O), 165.36 (C=O), 165.32 (C=O), 138.47 (Ar), 138.43 (Ar), 138.22 (Ar), 138.17 (Ar), 138.15 (Ar), 138.12 (Ar), 138.09 (Ar), 138.07 (Ar), 137.96 (Ar), 137.87 (Ar), 137.83 (Ar), 137.58 (Ar), 133.43 (Ar), 133.36 (Ar), 133.35 (Ar), 133.33 (Ar), 130.01 (Ar), 129.96 (Ar), 129.93 (Ar), 129.66 (Ar), 129.62 (Ar), 129.55 (Ar), 129.53 (Ar), 128.58 (Ar), 128.42 (Ar), 128.37 (Ar), 128.32 (Ar), 128.26 (Ar), 128.16 (Ar), 128.15 (Ar), 128.05 (Ar), 128.01 (Ar), 127.94 (Ar), 127.79 (Ar), 127.77 (Ar), 127.74 (Ar), 127.70 (Ar), 127.52 (Ar), 127.50 (Ar), 127.46 (Ar), 127.42 (Ar), 107.03 (C-1<sup>c</sup>), 106.77 (C-1<sup>f</sup>), 106.72 (C-1<sup>e</sup>), 106.64 (C-1<sup>d</sup>), 106.26 (C-1<sup>b</sup>), 105.99 (C-1<sup>a</sup>), 83.92, 83.90, 83.69, 83.67, 83.50, 83.31 (C-3), 83.24 (C-3), 82.94, 82.93, 82.84, 82.58, 82.47 (C-2), 82.40 (C-2), 82.13 (C-2), 82.08 (C-2), 82.02 (C-2), 81.96, 81.85 (C-2<sup>e</sup>), 77.53 (C-5<sup>f</sup>), 77.07 (C-5<sup>d</sup>), 76.89 (C-5<sup>b</sup>), 74.83 (C-5<sup>e</sup>), 74.00 (C-5<sup>a</sup>), 73.95 (×2, PhCH<sub>2</sub>), 73.83 (C-5<sup>c</sup>), 73.49 (PhCH<sub>2</sub>), 73.39 (PhCH<sub>2</sub>), 73.38 (PhCH<sub>2</sub>), 72.93 (PhCH<sub>2</sub>), 72.90 (PhCH<sub>2</sub>), 72.66 (PhCH<sub>2</sub>), 72.60 (PhCH<sub>2</sub>), 72.21 (PhCH<sub>2</sub>), 72.11 (PhCH<sub>2</sub>), 72.07 (PhCH<sub>2</sub>), 71.60 (C-6), 71.47 (C-6), 71.06 (C-6<sup>a</sup>), 69.85 (C-6<sup>b</sup>), 69.42 (C-6<sup>d</sup>), 67.62 (octyl OCH<sub>2</sub>), 62.01 (C-6<sup>f</sup>), 31.97 (octyl CH<sub>2</sub>), 29.58 (octyl CH<sub>2</sub>), 29.55 (octyl OCH<sub>2</sub>CH<sub>2</sub>), 29.38 (octyl CH<sub>2</sub>), 26.23 (octyl CH<sub>2</sub>), 22.79 (octyl CH<sub>2</sub>), 14.25

(octyl CH<sub>3</sub>); HRMS (ESI) Calcd for C<sub>170</sub>H<sub>174</sub>O<sub>37</sub>Na<sub>2</sub> [M + 2Na]<sup>2+</sup>: 1426.5759, found: 1426.5749.

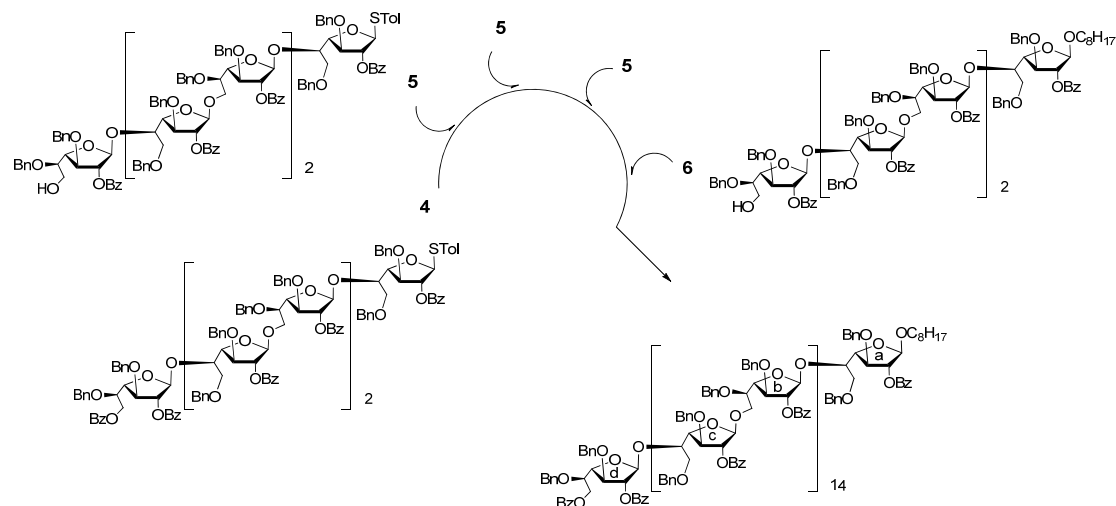

**Octyl** 2,6-di-*O*-benzoyl-3,5-di-*O*-benzyl-β-D-galactofuranosyl<sup>d</sup>-(1→5)-2-*O*-benzoyl-3,6-di-*O*-benzyl-β-D-galactofuranosyl<sup>c14</sup>-(1→6)-2-*O*-benzoyl-3,5-di-*O*-benzyl-β-D-galactofuranosyl<sup>b14</sup>-(1→5)-2-*O*-benzoyl-3,6-di-*O*-benzyl-β-D-galactofuranosyl<sup>c13</sup>-(1→6)-2-*O*-benzoyl-3,5-di-*O*-benzyl-β-D-galactofuranosyl<sup>b13</sup>-(1→5)-2-*O*-benzoyl-3,6-di-*O*-benzyl-β-D-galactofuranosyl<sup>c12</sup>-(1→6)-2-*O*-benzoyl-3,5-di-*O*-benzyl-β-D-galactofuranosyl<sup>b12</sup>-(1→5)-2-*O*-benzoyl-3,6-di-*O*-benzyl-β-D-galactofuranosyl<sup>c11</sup>-(1→6)-2-*O*-benzoyl-3,5-di-*O*-benzyl-β-D-galactofuranosyl<sup>b11</sup>-(1→5)-2-*O*-benzoyl-3,6-di-*O*-benzyl-β-D-galactofuranosyl<sup>c10</sup>-(1→6)-2-*O*-benzoyl-3,5-di-*O*-benzyl-β-D-galactofuranosyl<sup>b10</sup>-(1→5)-2-*O*-benzoyl-3,6-di-*O*-benzyl-β-D-galactofuranosyl<sup>c9</sup>-(1→6)-2-*O*-benzoyl-3,5-di-*O*-benzyl-β-D-galactofuranosyl<sup>b9</sup>-(1→5)-2-*O*-benzoyl-3,6-di-*O*-benzyl-β-D-galactofuranosyl<sup>c8</sup>-(1→6)-2-*O*-benzoyl-3,5-di-*O*-benzyl-β-D-galactofuranosyl<sup>b8</sup>-(1→5)-2-*O*-benzoyl-3,6-di-*O*-benzyl-β-D-galactofuranosyl<sup>c7</sup>-(1→6)-2-*O*-benzoyl-3,5-di-*O*-benzyl-β-D-galactofuranosyl<sup>b7</sup>-(1→5)-2-*O*-benzoyl-3,6-di-*O*-benzyl-β-D-galactofuranosyl<sup>c6</sup>-(1→6)-2-*O*-benzoyl-3,5-di-*O*-benzyl-β-D-galactofuranosyl<sup>b6</sup>-(1→5)-2-*O*-benzoyl-3,6-di-*O*-benzyl-β-D-galactofuranosyl<sup>c5</sup>-(1→6)-2-*O*-benzoyl-3,5-di-*O*-benzyl-β-D-galactofuranosyl<sup>b5</sup>-(1→5)-2-*O*-benzoyl-3,6-di-*O*-benzyl-β-D-galactofuranosyl<sup>c4</sup>-(1→6)-2-*O*-benzoyl-3,5-di-*O*-benzyl-β-D-galactofuranosyl<sup>b4</sup>-(1→5)-2-*O*-benzoyl-3,6-di-*O*-benzyl-β-D-galactofuranosyl<sup>c3</sup>-(1→6)-2-

***O*-benzoyl-3,5-di-*O*-benzyl- $\beta$ -D-galactofuranosyl<sup>b3</sup>-(1 $\rightarrow$ 5)-2-*O*-benzoyl-3,6-di-*O*-benzyl- $\beta$ -D-galactofuranosyl<sup>c2</sup>-(1 $\rightarrow$ 6)-2-*O*-benzoyl-3,5-di-*O*-benzyl- $\beta$ -D-galactofuranosyl<sup>b2</sup>-(1 $\rightarrow$ 5)-2-*O*-benzoyl-3,6-di-*O*-benzyl- $\beta$ -D-galactofuranosyl<sup>c1</sup>-(1 $\rightarrow$ 6)-2-*O*-benzoyl-3,5-di-*O*-benzyl- $\beta$ -D-galactofuranosyl<sup>b1</sup>-(1 $\rightarrow$ 5)-2-*O*-benzoyl-3,6-di-*O*-benzyl- $\beta$ -D-galactofuranoside<sup>a</sup> (22):** A mixture of **4** (25.00 mg, 8.60  $\mu$ mol), TTBP (8.8 mg, 35.3  $\mu$ mol) and freshly activated 4 Å molecular sieves (400 mg) in anhydrous CH<sub>2</sub>Cl<sub>2</sub> (1.5 mL) under argon atmosphere was stirred for 20 min at room temperature, and cooled to -78 °C. 5 min later, stoichiometric *p*-TolSCl (29.7  $\mu$ L, 8.60  $\mu$ mol, 4% in anhydrous toluene) was added, followed by dropwise addition of AgOTf (65  $\mu$ L, 25.80  $\mu$ mol, 0.4 mol/L in anhydrous toluene/CH<sub>2</sub>Cl<sub>2</sub>, 3:1). After another 5 min, a solution of **5** (21.70 mg, 7.74  $\mu$ mol) in anhydrous CH<sub>2</sub>Cl<sub>2</sub> (0.6 mL) was slowly added. The resulting mixture was slowly warmed to room temperature within 2 h and cooled back to -78 °C. 5 min later, stoichiometric *p*-TolSCl (26.7  $\mu$ L, 7.74  $\mu$ mol, 4% in anhydrous toluene) was added, followed by dropwise addition of AgOTf (39  $\mu$ L, 15.5  $\mu$ mol, 0.4 mol/L in anhydrous toluene/CH<sub>2</sub>Cl<sub>2</sub>, 3:1). After another 5 min, a solution of **5** (19.29 mg, 6.88  $\mu$ mol) in anhydrous CH<sub>2</sub>Cl<sub>2</sub> (0.6 mL) was slowly added. The resulting mixture was slowly warmed to room temperature within 2 h and cooled back to -78 °C. 5 min later, stoichiometric *p*-TolSCl (23.7  $\mu$ L, 6.88  $\mu$ mol, 4% in anhydrous toluene) was added, followed by dropwise addition of AgOTf (35  $\mu$ L, 13.8  $\mu$ mol, 0.4 mol/L in anhydrous toluene/CH<sub>2</sub>Cl<sub>2</sub>, 3:1). After another 5 min, a solution of **5** (16.87 mg, 6.02  $\mu$ mol) in anhydrous CH<sub>2</sub>Cl<sub>2</sub> (0.6 mL) was slowly added. The resulting mixture was slowly warmed to room temperature within 2 h and cooled back to -78 °C. 5 min later, stoichiometric *p*-TolSCl (20.8  $\mu$ L, 6.02  $\mu$ mol, 4% in anhydrous toluene) was added, followed by dropwise addition of AgOTf (30  $\mu$ L, 12.0  $\mu$ mol, 0.4 mol/L in anhydrous toluene/CH<sub>2</sub>Cl<sub>2</sub>, 3:1). After another 5 min, a solution of **6** (19.33 mg, 6.88  $\mu$ mol) in anhydrous CH<sub>2</sub>Cl<sub>2</sub> (0.6 mL) was slowly added. The resulting mixture was slowly warmed to room temperature within 2 h, quenched with Et<sub>3</sub>N (50  $\mu$ L) and filtered through Celite. After removal of the solvent, the desired product was purified by column chromatography on silica gel (petroleum ether/acetone, 1.9:1) to give a crude product, which was further purified by size exclusion chromatography

(Bio-Beads S-X1, toluene/ethyl acetate, 1:1) to afford **22** (56.0 mg, 68%) as white foam.  $R_f = 0.40$  (petroleum ether/acetone, 1.5:1);  $[\alpha]_D^{30} -60.2$  ( $c$  1.2,  $\text{CH}_2\text{Cl}_2$ );  $^1\text{H NMR}$  (600 MHz,  $\text{CDCl}_3$ )  $\delta$  8.02 – 7.92 (m, 60H, Ar), 7.86 – 7.85 (m, 2H, Ar), 7.57 – 6.95 (m, 393H, Ar), 5.62 (s, 1H, H-1<sup>d</sup>), 5.57 – 5.55 (m, 14H, H-1<sup>b1-b14</sup>), 5.52 (s, 1H, H-2<sup>d</sup>), 5.48 (br s, 14H, H-2<sup>b1-b14</sup>), 5.33 – 5.31 (m, 15H, H-2<sup>a,c1-c14</sup>), 5.11 (s, 1H, H-1<sup>a</sup>), 5.06 – 5.03 (m, 14H, H-1<sup>c1-c14</sup>), 4.73 – 4.13 (m, 182H,  $\text{PhCH}_2$ , H-3<sup>a,c1-c14</sup>, H-4<sup>a,b1-b14,c1-c14,d</sup>, H-5<sup>a,c1-c14</sup>, H-6<sup>d</sup>), 4.07 (d,  $J = 5.8$  Hz, 1H, H-3<sup>d</sup>), 4.02 – 3.99 (m, 14H, H-3<sup>b1-b14</sup>), 3.86 – 3.57 (m, 74H, H-5<sup>b1-b14,d</sup>, H-6<sup>a,b1-b14,c1-c14</sup>, octyl  $\text{OCH}_2$ ), 3.41 (dt,  $J = 9.6, 6.6$  Hz, 1H, octyl  $\text{OCH}_2$ ), 1.59 – 1.54 (m, 2H, octyl  $\text{CH}_2$ ), 1.26 – 1.23 (m, 10H, octyl  $\text{CH}_2$ ), 0.85 (t,  $J = 7.0$  Hz, 3H, octyl  $\text{CH}_3$ );  $^{13}\text{C NMR}$  (150 MHz,  $\text{CDCl}_3$ )  $\delta$  166.19 (C=O), 165.67 (C=O), 165.50 ( $\times 13$ , C=O), 165.45 (C=O), 165.42 (C=O), 165.34 ( $\times 13$ , C=O), 138.46 (Ar), 138.42 (Ar), 138.21 (Ar), 138.12 (Ar), 138.05 (Ar), 138.02 (Ar), 137.87 (Ar), 137.85 (Ar), 137.78 (Ar), 138.62 (Ar), 133.35 (Ar), 133.06 (Ar), 129.97 (Ar), 129.93 (Ar), 129.66 (Ar), 129.60 (Ar), 129.55 (Ar), 129.50 (Ar), 128.59 (Ar), 128.56 (Ar), 128.45 (Ar), 128.41 (Ar), 128.36 (Ar), 128.33 (Ar), 128.29 (Ar), 128.25 (Ar), 128.14 (Ar), 128.12 (Ar), 128.08 (Ar), 128.01 (Ar), 127.94 (Ar), 127.90 (Ar), 127.77 (Ar), 127.71 (Ar), 127.66 (Ar), 127.57 (Ar), 127.52 (Ar), 127.50 (Ar), 127.45 (Ar), 127.40 (Ar), 127.37 (Ar), 107.02 ( $\times 13$ , C-1<sup>c1-c13</sup>), 106.91 (C-1<sup>c14</sup>), 106.73 (C-1<sup>d</sup>), 106.62 ( $\times 13$ , C-1<sup>b2-b14</sup>), 106.24 (C-1<sup>b1</sup>), 105.99 (C-1<sup>a</sup>), 83.91, 83.84, 83.70, 83.52, 83.31, 83.24, 82.95, 82.76, 82.47, 82.40, 82.17, 82.07, 81.97, 75.90 (C-5<sup>d</sup>), 74.24, 73.98, 73.92, 73.89, 73.75, 73.49, 73.44, 73.38, 73.36, 73.32, 72.89, 72.71, 72.66, 72.12, 72.07, 71.58, 71.55, 71.05, 69.81, 69.53, 69.46, 67.63 (octyl  $\text{OCH}_2$ ), 64.93 (C-6<sup>d</sup>), 31.97 (octyl  $\text{CH}_2$ ), 29.57 (octyl  $\text{CH}_2$ ), 29.54 (octyl  $\text{OCH}_2\text{CH}_2$ ), 29.38 (octyl  $\text{CH}_2$ ), 26.22 (octyl  $\text{CH}_2$ ), 22.79 (octyl  $\text{CH}_2$ ), 14.24 (octyl  $\text{CH}_3$ ); MALDI-TOF MS Calcd for  $\text{C}_{825}\text{H}_{802}\text{O}_{182}\text{Na}$   $[\text{M} + \text{Na}]^+$   $m/z$ : 13652.1, found: 13650.8.



1.35 – 1.24 (m, 10H, octyl CH<sub>2</sub>), 0.86 (t,  $J = 6.8$  Hz, 3H, octyl CH<sub>3</sub>), <sup>13</sup>C NMR (150 MHz, D<sub>2</sub>O)  $\delta$  108.70 (C-1), 108.63 (C-1), 107.91 (C-1), 107.82 (C-1), 83.82, 83.42, 82.73, 82.67, 82.24, 82.08, 82.04, 81.89, 81.84, 77.54, 77.49, 77.45, 77.32, 77.29, 76.79, 76.66, 76.49, 71.35, 70.41, 70.34, 70.12, 69.50, 63.63, 61.92, 61.83, 31.93 (octyl CH<sub>2</sub>), 29.47 (octyl CH<sub>2</sub>), 29.24 (octyl CH<sub>2</sub>), 29.21 (octyl CH<sub>2</sub>), 26.02 (octyl CH<sub>2</sub>), 22.86 (octyl CH<sub>2</sub>), 14.27 (octyl CH<sub>3</sub>); MALDI-TOF MS Calcd for C<sub>188</sub>H<sub>318</sub>O<sub>151</sub>Na [M + Na]<sup>+</sup>  $m/z$ : 5017.4, found: 5018.1.

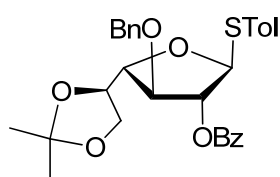

***p*-Tolyl 2-*O*-benzoyl-3-*O*-benzyl-5,6-*O*-isopropylidene-1-thio- $\beta$ -D-galactofuranoside (24c):** To a solution of **18c** (9.0 g, 16.96 mmol) in THF (30 mL) was added TBAF (25.5 mL, 25.5 mmol, 1 M in THF) at room temperature. After stirring for 30 min, the reaction mixture was concentrated to give a crude residue, which was dissolved in pyridine (50 mL), the resulting mixture was added a catalytic amount of DMAP (208 mg, 1.70 mmol) and BzCl (4.9 mL, 42.40 mmol) at 0 °C. After stirring for 36 h at room temperature, the solution was quenched with CH<sub>3</sub>OH (5 mL) and stirred for another 30 min. The solvent was evaporated *in vacuo* and the crude residue was purified by column chromatography on silica gel (petroleum ether/acetone, 35:1) to afford **24c** (8.33 g, 94% for two steps) as colorless syrup.  $R_f = 0.49$  (petroleum ether/ethyl acetate, 4:1);  $[\alpha]_D^{30} -136.5$  ( $c$  0.3, CH<sub>2</sub>Cl<sub>2</sub>); <sup>1</sup>H NMR (400 MHz, CDCl<sub>3</sub>)  $\delta$  8.03 (d,  $J = 7.5$  Hz, 2H, Ar), 7.59 (t,  $J = 7.4$  Hz, 1H, Ar), 7.47 – 7.43 (m, 4H, Ar), 7.38 – 7.28 (m, 5H, Ar), 7.11 (d,  $J = 7.9$  Hz, 2H, Ar), 5.62 (s, 1H, H-1), 5.56 (s, 1H, H-2), 4.85 (d,  $J = 11.9$  Hz, 1H, PhCH<sub>2</sub>), 4.62 (d,  $J = 11.9$  Hz, 1H, PhCH<sub>2</sub>), 4.42 (t,  $J = 5.4$  Hz, 1H, H-4), 4.27 (dd,  $J = 12.5, 6.5$  Hz, 1H, H-5), 4.01 (d,  $J = 5.2$  Hz, 1H, H-3), 3.91 – 3.87 (m, 1H, H-6a), 3.85 – 3.81 (m, 1H, H-6b), 2.32 (s, 3H, tolyl CH<sub>3</sub>), 1.40 (s, 1H, *i*-Pr), 1.34 (s, 1H, *i*-Pr); <sup>13</sup>C NMR (100 MHz, CDCl<sub>3</sub>)  $\delta$  165.48 (C=O), 137.99 (Ar), 137.38 (Ar), 133.66 (Ar), 133.00 (Ar), 130.39 (Ar), 129.95 (Ar),

129.89 (Ar), 129.49 (Ar), 128.66 (Ar), 128.60 (Ar), 128.29 (Ar), 128.12 (Ar), 109.94 (*i*-Pr), 91.82 (C-1), 83.71 (C-3), 82.96 (C-4), 82.05 (C-2), 75.52 (C-5), 72.54 (PhCH<sub>2</sub>), 65.60 (C-6), 26.52 (*i*-Pr), 25.49 (*i*-Pr), 21.25 (tolyl CH<sub>3</sub>); HRMS (ESI) Calcd for C<sub>30</sub>H<sub>32</sub>O<sub>6</sub>SNa [M + Na]<sup>+</sup>: 543.1812, found: 543.1819.

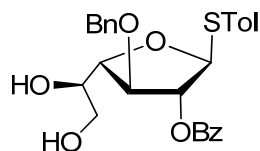

***p*-Tolyl 2-*O*-benzoyl-3-*O*-benzyl-1-thio- $\beta$ -D-galactofuranoside (24d):** A solution of **24c** (3.4 g, 6.53 mmol) in 70% AcOH aqueous solution (50 mL) was stirred overnight at 50 °C. When TLC indicated the disappearance of starting material, the solution was concentrated *in vacuo*. The residue was then purified by column chromatography on silica gel (petroleum ether/acetone, 4:1) to yield **24d** (2.93 g, 93%) as white foam. *R<sub>f</sub>* = 0.28 (petroleum ether/ethyl acetate, 1:1); [ $\alpha$ ]<sub>D</sub><sup>30</sup> -147.8 (*c* 0.4, CH<sub>2</sub>Cl<sub>2</sub>); <sup>1</sup>H NMR (400 MHz, CDCl<sub>3</sub>)  $\delta$  8.02 – 8.00 (m, 2H, Ar), 7.60 – 7.56 (m, 1H, Ar), 7.46 – 7.40 (m, 4H, Ar), 7.36 – 7.25 (m, 5H, Ar), 7.12 (d, *J* = 8.0 Hz, 2H, Ar), 5.57 (s, 1H, H-1), 5.52 (t, *J* = 1.7 Hz, 1H, H-2), 4.83 (d, *J* = 11.8 Hz, 1H, PhCH<sub>2</sub>), 4.61 (d, *J* = 11.9 Hz, 1H, PhCH<sub>2</sub>), 4.44 (dd, *J* = 6.0, 3.4 Hz, 1H, H-4), 4.24 (dd, *J* = 6.0, 1.1 Hz, 1H, H-3), 3.81 (br s, 1H, H-5), 3.72 – 3.68 (m, 2H, H-6a, H-6b), 2.52 (d, *J* = 7.5 Hz, 1H, -OH), 2.32 (s, 3H, tolyl CH<sub>3</sub>), 2.16 (br s, 1H, -OH); <sup>13</sup>C NMR (100 MHz, CDCl<sub>3</sub>)  $\delta$  165.48 (C=O), 138.36 (Ar), 137.26 (Ar), 133.70 (Ar), 133.24 (Ar), 129.96 (Ar), 129.90 (Ar), 129.86 (Ar), 129.27 (Ar), 128.66 (Ar), 128.63 (Ar), 128.18 (Ar), 128.16 (Ar), 91.87 (C-1), 83.45 (C-3), 83.40 (C-4), 81.96 (C-2), 72.76 (PhCH<sub>2</sub>), 70.67 (C-5), 64.75 (C-6), 21.25 (tolyl CH<sub>3</sub>); HRMS (ESI) Calcd for C<sub>27</sub>H<sub>28</sub>O<sub>6</sub>SNa [M + Na]<sup>+</sup>: 503.1499, found: 503.1511.

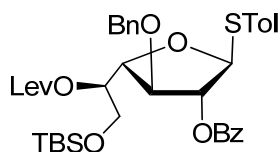

***p*-Tolyl 2-*O*-benzoyl-3-*O*-benzyl-5-*O*-levulinoyl-6-*O*-*tert*-butyldimethylsilyl-1-thio-**



**$\beta$ -D-galactofuranoside (24e):** To a solution of **24d** (5.24 g, 10.9 mmol) and imidazole (1.86 g, 27.3 mmol) in anhydrous CH<sub>2</sub>Cl<sub>2</sub> (25 mL) was added TBSCl (1.81 g, 12.0 mmol) at 0 °C, the mixture was stirred for 5 h at the same temperature. When TLC indicated the disappearance of **24d**, the reaction was quenched with CH<sub>3</sub>OH (5 mL) and stirred for another 30 min. The solvent was removed under reduced pressure, and the residue was purified by column chromatography on silica gel (petroleum ether/acetone, 30:1) to afford a colorless syrup, which was dissolved in anhydrous CH<sub>2</sub>Cl<sub>2</sub> (20 mL). To the resulting mixture was added EDC·HCl (3.13 g, 17.35 mmol) and DMAP (133 mg, 1.09 mmol), followed by the addition of Levulinoyl acid (1.34 mL, 13.1 mmol) at 0 °C. After stirring for 36 h at room temperature, the reaction mixture was diluted with CH<sub>2</sub>Cl<sub>2</sub> (50 mL) and washed with a saturated aqueous NaHCO<sub>3</sub> solution (30 mL) and brine (30 mL). The organic layer extract was dried over Na<sub>2</sub>SO<sub>4</sub>, filtered, and concentrated. The residue was purified by column chromatography on silica gel (petroleum ether/acetone, 20:1) to yield **24e** (6.05 g, 80% for two steps) as colorless syrup.  $R_f = 0.31$  (petroleum ether/ethyl acetate, 4:1);  $[\alpha]_D^{30} -81.1$  ( $c$  0.5, CH<sub>2</sub>Cl<sub>2</sub>); <sup>1</sup>H NMR (400 MHz, CDCl<sub>3</sub>)  $\delta$  8.07 – 8.05 (m, 2H, Ar), 7.58 (t,  $J = 7.4$  Hz, 1H, Ar), 7.46 – 7.42 (m, 4H, Ar), 7.36 – 7.22 (m, 5H, Ar), 7.10 (d,  $J = 8.0$  Hz, 2H, Ar), 5.58 (s, 1H, H-1), 5.50 (t,  $J = 1.8$  Hz, 1H, H-2), 5.24 – 5.20 (m, 1H, H-5), 4.78 (d,  $J = 11.8$  Hz, 1H, PhCH<sub>2</sub>), 4.63 – 4.59 (m, 2H, PhCH<sub>2</sub>, H-4), 4.09 (dd,  $J = 6.2, 1.7$  Hz, 1H, H-3), 3.77 – 3.69 (m, 2H, H-6a, H-6b), 2.69 – 2.56 (m, 2H, Lev CH<sub>2</sub>), 2.54 – 2.41 (m, 2H, Lev CH<sub>2</sub>), 2.32 (s, 3H, tolyl CH<sub>3</sub>), 2.09 (s, 3H, Lev CH<sub>3</sub>), 0.87 (s, 9H, *t*-Bu), 0.04 (s, 3H, CH<sub>3</sub>), 0.04 (s, 3H, CH<sub>3</sub>); <sup>13</sup>C NMR (100 MHz, CDCl<sub>3</sub>)  $\delta$  206.14 (C=O), 172.27 (C=O), 165.50 (C=O), 137.87 (Ar), 137.51 (Ar), 133.60 (Ar), 132.91 (Ar), 130.33 (Ar), 129.98 (Ar), 129.74 (Ar), 129.47 (Ar), 128.60 (Ar), 128.53 (Ar), 128.18 (Ar), 127.95 (Ar), 91.20 (C-1), 82.99 (C-3), 82.38 (C-2), 80.22 (C-4), 72.79 (PhCH<sub>2</sub>), 72.48 (C-5), 61.56 (C-6), 38.04 (Lev CH<sub>2</sub>), 29.83 (Lev CH<sub>3</sub>), 28.11 (Lev CH<sub>2</sub>), 25.91 (*t*-Bu), 21.25 (tolyl CH<sub>3</sub>), 18.32 (*t*-Bu), -5.31 (CH<sub>3</sub>); HRMS (ESI) Calcd for C<sub>38</sub>H<sub>48</sub>O<sub>8</sub>SSiNa [M + Na]<sup>+</sup>: 715.2731, found: 715.2743.

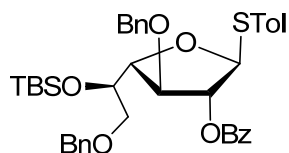

***p*-Tolyl 2-*O*-benzoyl-3,6-di-*O*-benzyl-5-*O*-*tert*-butyldimethylsilyl-1-thio- $\beta$ -D-galactofuranoside (**24f**):** To a solution of **19** (1.83 g, 3.21 mmol) and imidazole (0.87 g, 12.84 mmol) in anhydrous CH<sub>2</sub>Cl<sub>2</sub> (10 mL) was added TBSCl (0.97 g, 6.42 mmol) at 0 °C, the reaction mixture was refluxed for 5 h, then the reaction was quenched with CH<sub>3</sub>OH (0.5 mL) and stirred for another 30 min at room temperature. The solvent was removed under reduced pressure, and the residue was purified by column chromatography on silica gel (petroleum ether/acetone, 100:1) to give **24f** (2.11 g, 96%) as colorless syrup.  $R_f = 0.55$  (petroleum ether/ethyl acetate, 8:1);  $[\alpha]_D^{30} -105.7$  ( $c$  0.7, CH<sub>2</sub>Cl<sub>2</sub>); <sup>1</sup>H NMR (400 MHz, CDCl<sub>3</sub>)  $\delta$  8.03 – 8.00 (m, 2H, Ar), 7.58 (t,  $J = 7.4$  Hz, 1H, Ar), 7.45 – 7.41 (m, 4H, Ar), 7.35 – 7.25 (m, 10H, Ar), 7.06 (d,  $J = 8.0$  Hz, 2H, Ar), 5.60 (s, 1H, H-1), 5.52 (t,  $J = 1.8$  Hz, 1H, H-2), 4.80 (d,  $J = 11.9$  Hz, 1H, PhCH<sub>2</sub>), 4.59 (d,  $J = 11.9$  Hz, 1H, PhCH<sub>2</sub>), 4.51 (dd,  $J = 5.7, 3.8$  Hz, 1H, H-4), 4.46 (t,  $J = 12.4$  Hz, 2H, PhCH<sub>2</sub>), 4.24 (d,  $J = 5.1$  Hz, 1H, H-3), 4.08 – 4.04 (m, 1H, H-5), 3.57 (dd,  $J = 9.6, 5.5$  Hz, 1H, H-6a), 3.49 (dd,  $J = 9.5, 6.3$  Hz, 1H, H-6b), 2.31 (s, 3H, tolyl CH<sub>3</sub>), 0.81 (s, 9H, *t*-Bu), 0.02 (s, 3H, CH<sub>3</sub>), -0.05 (s, 3H, CH<sub>3</sub>); <sup>13</sup>C NMR (100 MHz, CDCl<sub>3</sub>)  $\delta$  165.54 (C=O), 138.30 (Ar), 137.78 (Ar), 137.74 (Ar), 133.53 (Ar), 133.00 (Ar), 130.51 (Ar), 129.98 (Ar), 129.73 (Ar), 129.59 (Ar), 128.56 (Ar), 128.45 (Ar), 128.11 (Ar), 127.95 (Ar), 127.70 (Ar), 127.66 (Ar), 91.25 (C-1), 83.53 (C-4), 82.93 (C-3), 82.51 (C-2), 73.54 (PhCH<sub>2</sub>), 72.35 (PhCH<sub>2</sub>), 72.30 (C-6), 71.04 (C-5), 26.02 (*t*-Bu), 21.25 (tolyl CH<sub>3</sub>), 18.33 (*t*-Bu), -4.14 (CH<sub>3</sub>), -4.85 (CH<sub>3</sub>); HRMS (ESI) Calcd for C<sub>40</sub>H<sub>48</sub>O<sub>6</sub>SSiNa [M + Na]<sup>+</sup>: 707.2833, found: 707.2823.

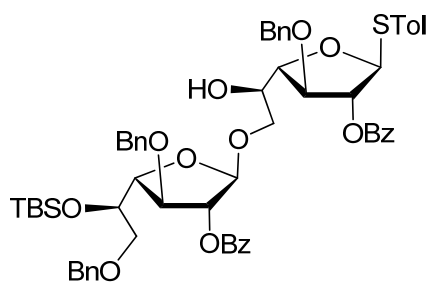

***p*-Tolyl**                      **2-*O*-benzoyl-3,6-di-*O*-benzyl-5-*O*-*tert*-butyldimethylsilyl- $\beta$ -D-galactofuranosyl-(1 $\rightarrow$ 6)-2-*O*-benzoyl-3-*O*-benzyl-1-thio- $\beta$ -D-galactofuranoside**

**(24g):** A mixture of **24f** (68.5 mg, 0.10 mmol), TTBP (29.8 mg, 0.12 mmol), and freshly activated 4 Å molecular sieves (2.5 g) in CH<sub>2</sub>Cl<sub>2</sub> (18 mL) under argon atmosphere was stirred for 20 min at room temperature, and cooled to -78 °C using acetone-anhydrous ice bath. 5 min later, stoichiometric *p*-TolSCl (13.8 μL, 0.10 mmol) was added without touching the wall of flask, followed by dropwise addition of AgOTf (0.5 mL, 0.20 mmol, 0.4 mol/L in anhydrous toluene/CH<sub>2</sub>Cl<sub>2</sub>, 3:1). After another 5 min, the acceptor **24d** (48.1 mg, 0.10 mmol) in anhydrous CH<sub>2</sub>Cl<sub>2</sub> (1 mL) was added dropwise. 5 min later, the reaction solution was quenched with Et<sub>3</sub>N (0.1 mL), warmed to room temperature, and filtered through Celite. The filtrate was concentrated to give a crude residue, which was purified by column chromatography on silica gel (petroleum ether/acetone, 10:1) to afford **24g** (57.0 mg, 55%) as white foam. *R*<sub>f</sub> = 0.46 (petroleum ether/ethyl acetate, 3:1); [ $\alpha$ ]<sub>D</sub><sup>30</sup> -91.3 (*c* 0.3, CH<sub>2</sub>Cl<sub>2</sub>); <sup>1</sup>H NMR (400 MHz, CDCl<sub>3</sub>)  $\delta$  8.03 – 8.00 (m, 4H, Ar), 7.61 – 7.54 (m, 2H, Ar), 7.46 – 7.20 (m, 21H, Ar), 7.09 (d, *J* = 8.0 Hz, 2H, Ar), 5.59 (s, 1H, H-1), 5.53 (t, *J* = 1.7 Hz, 1H, H-2), 5.37 (d, *J* = 1.4 Hz, 1H, H-2'), 5.18 (s, 1H, H-1'), 4.78 (t, *J* = 12.2 Hz, 2H, PhCH<sub>2</sub>), 4.61 (d, *J* = 11.9 Hz, 1H, PhCH<sub>2</sub>), 4.57 (d, *J* = 11.9 Hz, 1H, PhCH<sub>2</sub>), 4.43 – 4.40 (m, 3H, PhCH<sub>2</sub>, H-4), 4.32 (d, *J* = 5.6 Hz, 1H, H-3), 4.24 (dd, *J* = 6.1, 3.8 Hz, 1H, H-4'), 4.18 (d, *J* = 5.9 Hz, 1H, H-3'), 4.09 – 4.00 (m, 2H, H-5, H-5'), 3.81 (dd, *J* = 10.6, 4.0 Hz, 1H, H-6a), 3.63 – 3.54 (m, 2H, H-6b, H-6'a), 3.48 (dd, *J* = 9.6, 6.5 Hz, 1H, H-6'b), 2.62 (d, *J* = 5.8 Hz, 1H, -OH), 2.29 (s, 3H, tolyl CH<sub>3</sub>), 0.82 (s, 9H, *t*-Bu), 0.04 (s, 3H, CH<sub>3</sub>), -0.02 (s, 3H, CH<sub>3</sub>); <sup>13</sup>C NMR (100 MHz, CDCl<sub>3</sub>)  $\delta$  165.75 (C=O), 165.56 (C=O), 138.26 (Ar), 137.84 (Ar), 137.82 (Ar), 137.66 (Ar), 133.54 (Ar), 132.80 (Ar), 130.58 (Ar), 130.01 (Ar), 129.98 (Ar), 129.87 (Ar), 129.61 (Ar), 129.56 (Ar), 128.63 (Ar), 128.58 (Ar), 128.57 (Ar), 128.54 (Ar), 128.46 (Ar), 128.13 (Ar), 128.09 (Ar), 128.00 (Ar), 127.91 (Ar), 127.72 (Ar), 127.70 (Ar), 106.81 (C-1'), 91.85 (C-1), 83.73 (C-4'), 83.41 (C-3), 82.82 (C-3'), 82.70 (C-2'), 82.45 (C-4), 82.20 (C-2), 73.53 (PhCH<sub>2</sub>), 72.73 (PhCH<sub>2</sub>), 72.43, 72.40, 71.00 (C-5'), 69.60 (C-6), 69.54 (C-5), 26.06 (*t*-Bu), 21.24 (tolyl CH<sub>3</sub>), 18.39 (*t*-Bu), -4.11 (CH<sub>3</sub>), -4.76 (CH<sub>3</sub>); HRMS (ESI)

Calcd for C<sub>60</sub>H<sub>72</sub>O<sub>12</sub>NSSi [M + NH<sub>4</sub>]<sup>+</sup>: 1058.4539, found: 1058.4551.

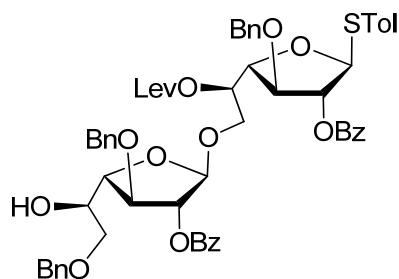

***p*-Tolyl 2-*O*-benzoyl-3,6-di-*O*-benzyl- $\beta$ -D-galactofuranosyl-(1 $\rightarrow$ 6)-2-*O*-benzoyl-3-*O*-benzyl-5-*O*-levulinoyl-1-thio- $\beta$ -D-galactofuranoside (**24b**):** To a solution of **24g** (210 mg, 0.202 mmol) in anhydrous CH<sub>2</sub>Cl<sub>2</sub> (5 mL) was added EDC·HCl (96.8 g, 0.505 mmol) and DMAP (2.4 mg, 0.02 mmol), followed by the addition of Levulinoyl acid (41.5 mL, 0.404 mmol) at 0 °C. After stirring for 24 h at 35 °C, the reaction mixture was diluted with CH<sub>2</sub>Cl<sub>2</sub> (15 mL) and washed with a saturated aqueous NaHCO<sub>3</sub> solution (10 mL) and brine (10 mL). The organic layer extract was dried over Na<sub>2</sub>SO<sub>4</sub>, filtered, and concentrated. The residue was purified by column chromatography on silica gel (petroleum ether/acetone, 10:1) to give a white foam, which was dissolved in THF (5 mL) and H<sub>2</sub>O (0.5 mL). To the resulting solution was added 70% HF-pyridine (1.0 mL) at 0 °C, the reaction solution was warmed to 35 °C and stirred overnight. Then the reaction mixture was quenched with a saturated aqueous NaHCO<sub>3</sub> solution (40 mL), and extracted with EtOAc (2  $\times$  40 mL). The combined organic layer, after being washed with 0.1 N HCl (2  $\times$  30 mL), saturated aqueous NaHCO<sub>3</sub> solution (30 mL) and brine (30 mL), was dried over Na<sub>2</sub>SO<sub>4</sub>, filtered, and concentrated. The residue was purified by column chromatography on silica gel (petroleum ether/ethyl acetate, 2:1) to afford **24b** (153 mg, 74% for two steps) as white foam.  $R_f$  = 0.59 (petroleum ether/ethyl acetate, 1:1);  $[\alpha]_D^{30}$  -80.2 ( $c$  0.9, CH<sub>2</sub>Cl<sub>2</sub>); <sup>1</sup>H NMR (400 MHz, CDCl<sub>3</sub>)  $\delta$  8.07 – 8.05 (m, 2H, Ar), 8.00 – 7.98 (m, 2H, Ar), 7.60 – 7.54 (m, 2H, Ar), 7.46 – 7.40 (m, 6H, Ar), 7.36 – 7.20 (m, 15H, Ar), 7.08 (d,  $J$  = 8.0 Hz, 2H, Ar), 5.58 (s, 1H, H-1), 5.50 (t,  $J$  = 1.9 Hz, 1H, H-2), 5.48 – 5.44 (m, 1H, H-5), 5.33 (d,  $J$  = 1.3 Hz, 1H, H-2'), 5.13 (s, 1H, H-1'), 4.79 – 4.74 (m, 2H, PhCH<sub>2</sub>), 4.61 – 4.57 (m, 2H, PhCH<sub>2</sub>, H-3), 4.54 (d,  $J$  = 12.0 Hz, 1H, PhCH<sub>2</sub>), 4.50 (d,

$J = 11.9$  Hz, 1H, PhCH<sub>2</sub>), 4.46 (d,  $J = 11.9$  Hz, 1H, PhCH<sub>2</sub>), 4.18 (dd,  $J = 5.8, 3.7$  Hz, 1H, H-4'), 4.15 – 4.11 (m, 2H, H-3', H-4), 3.94 – 3.87 (m, 2H, H-5', H-6a), 3.67 (dd,  $J = 10.8, 7.4$  Hz, 1H, H-6b), 3.55 – 3.47 (m, 2H, H-6'a, H-6'b), 2.67 – 2.42 (m, 4H, Lev CH<sub>2</sub>CH<sub>2</sub>), 2.38 (d,  $J = 6.1$  Hz, 1H, -OH), 2.29 (s, 3H, tolyl CH<sub>3</sub>), 2.05 (s, 3H, Lev CH<sub>3</sub>); <sup>13</sup>C NMR (100 MHz, CDCl<sub>3</sub>)  $\delta$  206.23 (C=O), 172.35 (C=O), 165.50 (C=O), 138.06 (Ar), 137.88 (Ar), 137.71 (Ar), 137.54 (Ar), 133.60 (Ar), 133.57 (Ar), 132.81 (Ar), 130.40 (Ar), 130.02 (Ar), 129.92 (Ar), 129.86 (Ar), 129.55 (Ar), 129.50 (Ar), 128.63 (Ar), 128.58 (Ar), 128.53 (Ar), 128.26 (Ar), 128.12 (Ar), 127.96 (Ar), 127.93 (Ar), 127.89 (Ar), 127.86 (Ar), 106.91 (C-1'), 91.43 (C-1), 83.51 (C-3'), 83.19 (C-4), 82.91 (C-4'), 82.27 (C-2), 81.78 (C-2'), 80.79 (C-3), 73.56 (PhCH<sub>2</sub>), 72.93 (PhCH<sub>2</sub>), 72.51 (PhCH<sub>2</sub>), 71.85 (C-6'), 70.76 (C-5), 70.21 (C-5'), 66.50 (C-6), 38.09 (Lev CH<sub>2</sub>), 29.77 (Lev CH<sub>3</sub>), 28.18 (Lev CH<sub>2</sub>), 21.25 (tolyl CH<sub>3</sub>); HRMS (ESI) Calcd for C<sub>59</sub>H<sub>64</sub>O<sub>14</sub>NS [M + NH<sub>4</sub>]<sup>+</sup>: 1042.4042, found: 1042.4052.

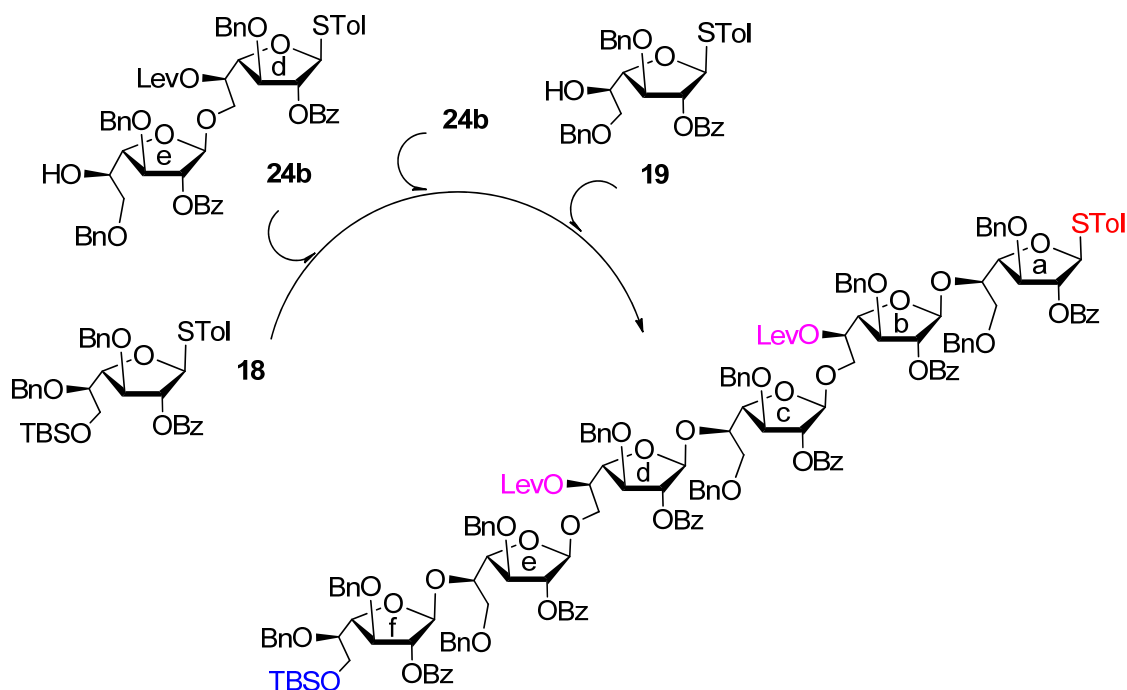

*p*-Tolyl                      2-*O*-benzoyl-3,5-di-*O*-benzyl-6-*O*-*tert*-butyldimethylsilyl- $\beta$ -D-galactofuranosyl<sup>f</sup>-(1→5)-2-*O*-benzoyl-3,6-di-*O*-benzyl- $\beta$ -D-galactofuranosyl<sup>e</sup>-(1→6)-2-*O*-benzoyl-3-*O*-benzyl-5-*O*-levulinoyl- $\beta$ -D-galactofuranosyl<sup>d</sup>-(1→5)-2-*O*-benz

**oyl-3,6-di-*O*-benzyl- $\beta$ -D-galactofuranosyl<sup>c</sup>-(1 $\rightarrow$ 6)-2-*O*-benzoyl-3-*O*-benzyl-5-*O*-levulinoyl- $\beta$ -D-galactofuranosyl<sup>b</sup>-(1 $\rightarrow$ 5)-2-*O*-benzoyl-3,6-di-*O*-benzyl-1-thio- $\beta$ -D-galactofuranoside<sup>a</sup> (**9**):** A mixture of **18** (150.2 mg, 219.3  $\mu$ mol), TTBP (184 mg, 739.4  $\mu$ mol) and freshly activated 4 Å molecular sieves (2.5 g) in anhydrous CH<sub>2</sub>Cl<sub>2</sub> (15 mL) under argon atmosphere was stirred for 20 min at room temperature, and cooled to -78 °C. 5 min later, stoichiometric *p*-TolSCl (30.3  $\mu$ L, 219.3  $\mu$ mol) was added, followed by dropwise addition of AgOTf (1.1 mL, 438.6  $\mu$ mol, 0.4 mol/L in anhydrous toluene/CH<sub>2</sub>Cl<sub>2</sub>, 3:1). After another 5 min, a solution of **24b** (213.6 mg, 208.3  $\mu$ mol) in anhydrous CH<sub>2</sub>Cl<sub>2</sub> (2 mL) was slowly added. The resulting mixture was slowly warmed to room temperature within 2 h and cooled back to -78 °C. 5 min later, stoichiometric *p*-TolSCl (28.7  $\mu$ L, 208.3  $\mu$ mol) was added, followed by dropwise addition of AgOTf (1 mL, 416.7  $\mu$ mol, 0.4 mol/L in anhydrous toluene/CH<sub>2</sub>Cl<sub>2</sub>, 3:1). After another 5 min, a solution of **24b** (193.3 mg, 188.6  $\mu$ mol) in anhydrous CH<sub>2</sub>Cl<sub>2</sub> (2 mL) was slowly added. The resulting mixture was slowly warmed to room temperature within 2 h and cooled back to -78 °C. 5 min later, stoichiometric *p*-TolSCl (26.0  $\mu$ L, 188.6  $\mu$ mol) was added, followed by dropwise addition of AgOTf (0.9 mL, 377.2  $\mu$ mol, 0.4 mol/L in anhydrous toluene/CH<sub>2</sub>Cl<sub>2</sub>, 3:1). After another 5 min, a solution of **19** (125.1 mg, 219.3  $\mu$ mol) in anhydrous CH<sub>2</sub>Cl<sub>2</sub> (2 mL) was slowly added. The resulting mixture was slowly warmed to room temperature within 2 h, quenched with Et<sub>3</sub>N (300  $\mu$ L) and filtered through Celite. After removal of the solvent, the desired product was purified by column chromatography on silica gel (petroleum ether/acetone, 3.5:1) to afford **9** (437.4 mg, 79%) as white foam.  $R_f$  = 0.30 (petroleum ether/ethyl acetate, 2:1);  $[\alpha]_D^{30}$  -63.4 (*c* 0.4, CH<sub>2</sub>Cl<sub>2</sub>); <sup>1</sup>H NMR (600 MHz, CDCl<sub>3</sub>)  $\delta$  8.03 – 7.91 (m, 12H, Ar), 7.58 – 7.52 (m, 3H, Ar), 7.49 – 7.46 (m, 1H, Ar), 7.44 – 7.37 (m, 10H, Ar), 7.32 – 7.05 (m, 56H, Ar), 7.02 (d, *J* = 8.0 Hz, 2H, Ar), 5.63 (s, 1H, H-1<sup>f</sup>), 5.57 (br s, 2H, H-1<sup>a,d</sup>), 5.491 – 5.485 (m, 4H, H-2<sup>a,d,f</sup>, H-1<sup>b</sup>), 5.44 (d, *J* = 1.7 Hz, 1H, H-2<sup>b</sup>), 5.30 – 5.26 (m, 2H, H-5<sup>b,d</sup>), 5.22 (d, *J* = 1.7 Hz, 1H, H-2<sup>e</sup>), 5.21 (d, *J* = 2.0 Hz, 1H, H-2<sup>c</sup>), 4.96 (s, 1H, H-1<sup>e</sup>), 4.95 (s, 1H, H-1<sup>c</sup>), 4.73 (d, *J* = 11.5 Hz, 1H, PhCH<sub>2</sub>), 4.68 – 4.62 (m, 6H, PhCH<sub>2</sub>), 4.56 (d, *J* = 11.6 Hz, 1H, PhCH<sub>2</sub>), 4.53 – 4.47 (m, 5H, PhCH<sub>2</sub>), 4.44 (t, *J* = 12.3 Hz, 2H, PhCH<sub>2</sub>),

4.38 – 4.23 (m, 12H, PhCH<sub>2</sub>, H-3<sup>a,c,e</sup>, H-4<sup>b,d,f</sup>), 4.20 – 4.13 (m, 5H, H-4<sup>c,e</sup>, H-5<sup>a,c,e</sup>), 4.00 – 3.99 (m, 3H, H-3<sup>b,d,f</sup>), 3.78 – 3.61 (m, 10H, H-6<sup>a,b,c,d,e,f</sup>), 3.55 – 3.51 (m, 2H, H-6<sup>b,d</sup>), 3.49 – 3.46 (m, 1H, H-5<sup>f</sup>), 2.58 – 2.31 (m, 8H, Lev CH<sub>2</sub>), 2.25 (s, 3H, tolyl CH<sub>3</sub>), 1.96 (s, 3H, Lev CH<sub>3</sub>), 1.93 (s, 3H, Lev CH<sub>3</sub>), 0.79 (s, 9H, *t*-Bu), -0.09 (s, 3H, CH<sub>3</sub>), -0.11 (s, 3H, CH<sub>3</sub>); <sup>13</sup>C NMR (150 MHz, CDCl<sub>3</sub>) δ 206.23 (Lev C=O), 206.15 (Lev C=O), 172.32 (Lev C=O), 172.22 (Lev C=O), 165.51 (C=O), 165.50 (C=O), 165.49 (C=O), 165.39 (C=O), 165.37 (C=O), 165.28 (C=O), 138.54 (Ar), 138.21 (Ar), 138.20 (Ar), 138.17 (Ar), 138.02 (Ar), 138.00 (Ar), 137.93 (Ar), 137.82 (Ar), 137.73 (Ar), 133.52 (Ar), 133.44 (Ar), 133.42 (Ar), 133.38 (Ar), 133.34 (Ar), 133.31 (Ar), 132.88 (Ar), 130.38 (Ar), 129.98 (Ar), 129.95 (Ar), 129.87 (Ar), 129.83 (Ar), 129.70 (Ar), 129.62 (Ar), 129.61 (Ar), 129.55 (Ar), 129.46 (Ar), 129.36 (Ar), 128.62 (Ar), 128.58 (Ar), 128.55 (Ar), 128.52 (Ar), 128.44 (Ar), 128.37 (Ar), 128.32 (Ar), 128.30 (Ar), 128.20 (Ar), 128.13 (Ar), 128.01 (Ar), 127.93 (Ar), 127.90 (Ar), 127.79 (Ar), 127.76 (Ar), 127.73 (Ar), 127.69 (Ar), 127.57 (Ar), 127.55 (Ar), 127.54 (Ar), 127.46 (Ar), 127.44 (Ar), 127.38 (Ar), 107.17 (C-1<sup>e</sup>), 107.07 (C-1<sup>e</sup>), 106.82 (C-1<sup>f</sup>), 106.55 (C-1<sup>d</sup>), 106.24 (C-1<sup>b</sup>), 91.26 (C-1<sup>a</sup>), 83.83, 83.69, 83.62, 83.58, 83.44, 83.31, 82.46, 82.42, 82.24, 82.19, 82.03, 82.00, 81.93, 81.88, 81.50, 78.92 (C-5<sup>f</sup>), 74.65 (C-5<sup>a</sup>), 74.10 (PhCH<sub>2</sub>), 73.99 (C-5<sup>e</sup>), 73.91 (C-5<sup>c</sup>), 73.54 (PhCH<sub>2</sub>), 73.35 (×2, PhCH<sub>2</sub>), 72.86 (PhCH<sub>2</sub>), 72.82 (PhCH<sub>2</sub>), 72.74 (PhCH<sub>2</sub>), 72.69 (PhCH<sub>2</sub>), 72.64 (PhCH<sub>2</sub>), 72.09 (PhCH<sub>2</sub>), 71.85 (C-6), 71.72 (C-6), 71.33 (C-5<sup>d</sup>), 71.10 (C-5<sup>b</sup>), 70.84 (C-6<sup>a</sup>), 67.26 (C-6<sup>b</sup>), 66.93 (C-6<sup>d</sup>), 64.80 (C-6<sup>f</sup>), 38.08 (Lev CH<sub>2</sub>), 38.04 (Lev CH<sub>2</sub>), 29.68 (Lev CH<sub>3</sub>), 29.63 (Lev CH<sub>3</sub>), 28.15 (Lev CH<sub>2</sub>), 28.12 (Lev CH<sub>2</sub>), 25.94 (*t*-Bu), 21.21 (tolyl CH<sub>3</sub>), 18.21 (*t*-Bu), -5.36 (×2, CH<sub>3</sub>); HRMS (ESI) Calcd for C<sub>171</sub>H<sub>186</sub>O<sub>40</sub>N<sub>2</sub>SSi [M + 2NH<sub>4</sub>]<sup>2+</sup>: 1483.6030, found: 1483.6063.

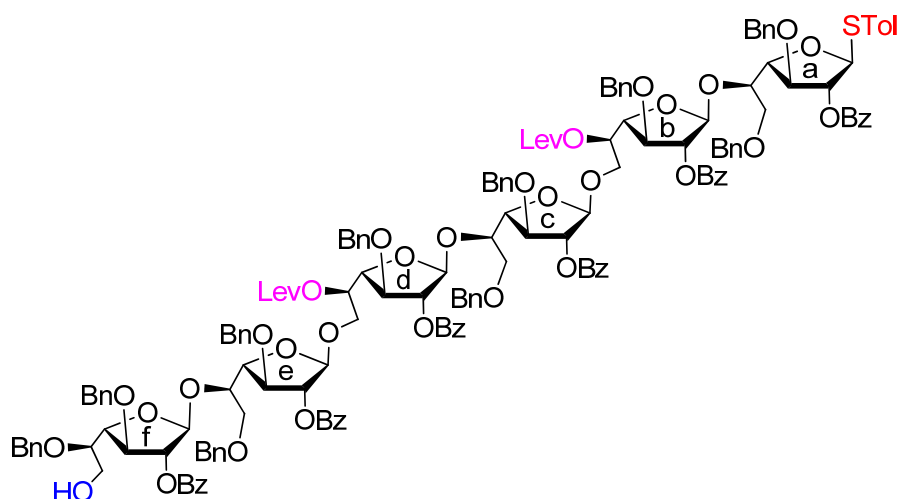

*p*-Tolyl 2-*O*-benzoyl-3,5-di-*O*-benzyl- $\beta$ -D-galactofuranosyl<sup>f</sup>-(1 $\rightarrow$ 5)-2-*O*-benzoyl-3,6-di-*O*-benzyl- $\beta$ -D-galactofuranosyl<sup>e</sup>-(1 $\rightarrow$ 6)-2-*O*-benzoyl-3-*O*-benzyl-5-*O*-levulinoyl- $\beta$ -D-galactofuranosyl<sup>d</sup>-(1 $\rightarrow$ 5)-2-*O*-benzoyl-3,6-di-*O*-benzyl- $\beta$ -D-galactofuranosyl<sup>c</sup>-(1 $\rightarrow$ 6)-2-*O*-benzoyl-3-*O*-benzyl-5-*O*-levulinoyl- $\beta$ -D-galactofuranosyl<sup>b</sup>-(1 $\rightarrow$ 5)-2-*O*-benzoyl-3,6-di-*O*-benzyl-1-thio- $\beta$ -D-galactofuranoside<sup>a</sup> (7): To a solution of **9** (480 mg, 0.164 mmol) in THF (5 mL) and H<sub>2</sub>O (0.5 mL) was added 70% HF-pyridine (0.5 mL) at 0 °C, the resulting mixture was warmed to 35 °C and stirred for 4 h. Then the reaction solution was quenched with a saturated aqueous NaHCO<sub>3</sub> solution (20 mL), and extracted with EtOAc (2  $\times$  30 mL). The combined organic layer, after being washed with 0.1 N HCl (2  $\times$  20 mL), saturated aqueous NaHCO<sub>3</sub> solution (30 mL) and brine (30 mL), was dried over Na<sub>2</sub>SO<sub>4</sub>, filtered, and concentrated. The residue was purified by column chromatography on silica gel (petroleum ether/ethyl acetate, 2:1) to afford **7** (417 mg, 90%) as white foam. *R*<sub>f</sub> = 0.46 (petroleum ether/acetone, 1.5:1); [ $\alpha$ ]<sub>D</sub><sup>30</sup> -76.7 (*c* 0.4, CH<sub>2</sub>Cl<sub>2</sub>); <sup>1</sup>H NMR (600 MHz, CDCl<sub>3</sub>)  $\delta$  8.03 – 7.92 (m, 12H, Ar), 7.58 – 7.56 (m, 1H, Ar), 7.55 – 7.49 (m, 3H, Ar), 7.44 – 7.38 (m, 10H, Ar), 7.35 – 7.06 (m, 56H, Ar), 7.02 (d, *J* = 8.0 Hz, 2H, Ar), 5.574 (br s, 2H, H-1<sup>a,d</sup>), 5.566 (s, 1H, H-1<sup>f</sup>), 5.49 – 5.48 (m, 4H, H-2<sup>a,d,f</sup>, H-1<sup>b</sup>), 5.44 (d, *J* = 1.7 Hz, 1H, H-2<sup>b</sup>), 5.30 – 5.27 (m, 2H, H-5<sup>b,d</sup>), 5.21 (d, *J* = 1.9 Hz, 1H, H-2<sup>c</sup>), 5.20 (s, 1H, H-2<sup>e</sup>), 4.964 (s, 1H, H-1<sup>e</sup>), 4.956 (s, 1H, H-1<sup>c</sup>), 4.73 (d, *J* = 11.6 Hz, 1H, PhCH<sub>2</sub>), 4.68 – 4.47 (m, 12H, PhCH<sub>2</sub>, H-4<sup>a</sup>), 4.44 (t, *J* = 12.9 Hz, 1H, PhCH<sub>2</sub>), 4.39 – 4.28 (m, 10H, PhCH<sub>2</sub>, H-3<sup>a,c</sup>, H-4<sup>b,f</sup>), 4.25 – 4.14 (m, 7H, H-3<sup>e</sup>, H-4<sup>d,c,e</sup>, H-5<sup>a,c,e</sup>), 4.02 – 3.99 (m, 3H, H-3<sup>b,d,f</sup>), 3.74 – 3.61 (m, 9H, H-6<sup>a,b,c,d,e,f</sup>), 3.58 – 3.53 (m, 3H, H-6<sup>b,d,f</sup>), 3.47 – 3.45 (m, 1H, H-5<sup>f</sup>),



2.57 – 2.31 (m, 8H, Lev CH<sub>2</sub>), 2.25 (s, 3H, tolyl CH<sub>3</sub>), 2.20 (t, *J* = 6.3 Hz, 1H, -OH), 1.96 (s, 3H, Lev CH<sub>3</sub>), 1.93 (s, 3H, Lev CH<sub>3</sub>); <sup>13</sup>C NMR (150 MHz, CDCl<sub>3</sub>) δ 206.22 (Lev C=O), 206.17 (Lev C=O), 172.40 (Lev C=O), 172.32 (Lev C=O), 165.52 (×2, C=O), 165.42 (C=O), 165.38 (C=O), 165.37 (C=O), 165.28 (C=O), 138.19 (Ar), 138.16 (Ar), 138.13 (Ar), 138.05 (Ar), 137.97 (Ar), 137.82 (Ar), 137.73 (Ar), 137.72 (Ar), 137.61 (Ar), 133.52 (Ar), 133.41 (Ar), 132.88 (Ar), 130.37 (Ar), 129.97 (Ar), 129.95 (Ar), 129.94 (Ar), 129.90 (Ar), 129.89 (Ar), 129.82 (Ar), 129.63 (Ar), 129.61 (Ar), 129.53 (Ar), 129.45 (Ar), 129.36 (Ar), 128.62 (Ar), 128.57 (Ar), 128.51 (Ar), 128.43 (Ar), 128.41 (Ar), 128.38 (Ar), 128.32 (Ar), 128.20 (Ar), 128.16 (Ar), 128.03 (Ar), 128.00 (Ar), 127.97 (Ar), 127.93 (Ar), 127.90 (Ar), 127.88 (Ar), 127.77 (Ar), 127.76 (Ar), 127.74 (Ar), 127.72 (Ar), 127.69 (Ar), 127.56 (Ar), 127.49 (Ar), 127.46 (Ar), 127.44 (Ar), 127.42 (Ar), 107.17 (C-1<sup>e</sup>), 106.81 (C-1<sup>e</sup>), 106.72 (C-1<sup>f</sup>), 106.59 (C-1<sup>d</sup>), 106.24 (C-1<sup>b</sup>), 91.25 (C-1<sup>a</sup>), 83.68, 83.62, 83.61, 83.58, 83.41, 83.00, 82.90, 82.57, 82.41, 82.26, 82.24, 82.18, 82.02, 82.00, 81.98, 81.93, 81.82, 81.48, 77.60 (C-5<sup>f</sup>), 74.65 (C-5<sup>a</sup>), 74.61 (C-5<sup>e</sup>), 74.03 (C-5<sup>c</sup>), 73.53 (PhCH<sub>2</sub>), 73.39 (PhCH<sub>2</sub>), 73.36 (PhCH<sub>2</sub>), 72.92 (PhCH<sub>2</sub>), 72.82 (PhCH<sub>2</sub>), 72.73 (PhCH<sub>2</sub>), 72.68 (PhCH<sub>2</sub>), 72.66 (PhCH<sub>2</sub>), 72.41 (PhCH<sub>2</sub>), 72.22 (PhCH<sub>2</sub>), 71.86 (PhCH<sub>2</sub>), 71.58 (PhCH<sub>2</sub>), 71.37 (C-5<sup>d</sup>), 71.09 (C-5<sup>b</sup>), 70.84 (C-6<sup>a</sup>), 67.25 (C-6<sup>b</sup>), 66.94 (C-6<sup>d</sup>), 62.01 (C-6<sup>f</sup>), 38.07 (Lev CH<sub>2</sub>), 38.01 (Lev CH<sub>2</sub>), 29.67 (Lev CH<sub>3</sub>), 29.62 (Lev CH<sub>3</sub>), 28.15 (Lev CH<sub>2</sub>), 28.12 (Lev CH<sub>2</sub>), 21.20 (tolyl CH<sub>3</sub>); HRMS (ESI) Calcd for C<sub>165</sub>H<sub>172</sub>O<sub>40</sub>N<sub>2</sub>S [M + 2NH<sub>4</sub>]<sup>2+</sup>: 1426.5598, found: 1426.5626.



**vulinoyl- $\beta$ -D-galactofuranosyl<sup>b4</sup>-(1 $\rightarrow$ 5)-2-*O*-benzoyl-3,6-di-*O*-benzyl- $\beta$ -D-galactofuranosyl<sup>c3</sup>-(1 $\rightarrow$ 6)-2-*O*-benzoyl-3,5-di-*O*-benzyl- $\beta$ -D-galactofuranosyl<sup>b3</sup>-(1 $\rightarrow$ 5)-2-*O*-benzoyl-3,6-di-*O*-benzyl- $\beta$ -D-galactofuranosyl<sup>c2</sup>-(1 $\rightarrow$ 6)-2-*O*-benzoyl-3,5-di-*O*-benzyl- $\beta$ -D-galactofuranosyl<sup>b2</sup>-(1 $\rightarrow$ 5)-2-*O*-benzoyl-3,6-di-*O*-benzyl- $\beta$ -D-galactofuranosyl<sup>c1</sup>-(1 $\rightarrow$ 6)-2-*O*-benzoyl-3,5-di-*O*-benzyl- $\beta$ -D-galactofuranosyl<sup>b1</sup>-(1 $\rightarrow$ 5)-2-*O*-benzoyl-3,6-di-*O*-benzyl- $\beta$ -D-galactofuranoside<sup>a</sup> (25):** A mixture of **4** (25.00 mg, 8.60  $\mu$ mol), TTBP (8.8 mg, 35.3  $\mu$ mol) and freshly activated 4 Å molecular sieves (400 mg) in anhydrous CH<sub>2</sub>Cl<sub>2</sub> (1.5 mL) under argon atmosphere was stirred for 20 min at room temperature, and cooled to -78 °C. 5 min later, stoichiometric *p*-TolSCL (29.7  $\mu$ L, 8.60  $\mu$ mol, 4% in anhydrous toluene) was added, followed by dropwise addition of AgOTf (65  $\mu$ L, 25.80  $\mu$ mol, 0.4 mol/L in anhydrous toluene/CH<sub>2</sub>Cl<sub>2</sub>, 3:1). After another 5 min, a solution of **5** (21.70 mg, 7.74  $\mu$ mol) in anhydrous CH<sub>2</sub>Cl<sub>2</sub> (0.6 mL) was slowly added. The resulting mixture was slowly warmed to room temperature within 2 h and cooled back to -78 °C. 5 min later, stoichiometric *p*-TolSCL (26.7  $\mu$ L, 7.74  $\mu$ mol, 4% in anhydrous toluene) was added, followed by dropwise addition of AgOTf (39  $\mu$ L, 15.5  $\mu$ mol, 0.4 mol/L in anhydrous toluene/CH<sub>2</sub>Cl<sub>2</sub>, 3:1). After another 5 min, a solution of **5** (19.29 mg, 6.88  $\mu$ mol) in anhydrous CH<sub>2</sub>Cl<sub>2</sub> (0.6 mL) was slowly added. The resulting mixture was slowly warmed to room temperature within 2 h and cooled back to -78 °C. 5 min later, stoichiometric *p*-TolSCL (23.7  $\mu$ L, 6.88  $\mu$ mol, 4% in anhydrous toluene) was added, followed by dropwise addition of AgOTf (35  $\mu$ L, 13.8  $\mu$ mol, 0.4 mol/L in anhydrous toluene/CH<sub>2</sub>Cl<sub>2</sub>, 3:1). After another 5 min, a solution of **7** (16.97 mg, 6.02  $\mu$ mol) in anhydrous CH<sub>2</sub>Cl<sub>2</sub> (0.6 mL) was slowly added. The resulting mixture was slowly warmed to room temperature within 2 h and cooled back to -78 °C. 5 min later, stoichiometric *p*-TolSCL (20.8  $\mu$ L, 6.02  $\mu$ mol, 4% in anhydrous toluene) was added, followed by dropwise addition of AgOTf (30  $\mu$ L, 12.0  $\mu$ mol, 0.4 mol/L in anhydrous toluene/CH<sub>2</sub>Cl<sub>2</sub>, 3:1). After another 5 min, a solution of **6** (24.16 mg, 8.60  $\mu$ mol) in anhydrous CH<sub>2</sub>Cl<sub>2</sub> (0.6 mL) was slowly added. The resulting mixture was slowly warmed to room temperature within 2 h, quenched with Et<sub>3</sub>N (50  $\mu$ L) and filtered through Celite. After removal of the solvent, the desired product was purified by

column chromatography on silica gel (petroleum ether/acetone, 1.8:1) to give a crude product, which was further purified by size exclusion chromatography (Bio-Beads S-X1, toluene/ethyl acetate, 1:1) to afford **25** (52.3 mg, 64%) as white foam.  $R_f = 0.45$  (petroleum ether/acetone, 1.3:1);  $[\alpha]_D^{30} -58.5$  ( $c$  0.5,  $\text{CH}_2\text{Cl}_2$ );  $^1\text{H}$  NMR (600 MHz,  $\text{CDCl}_3$ )  $\delta$  8.02 – 7.90 (m, 60H, Ar), 7.86 – 7.85 (m, 2H, Ar), 7.57 – 6.95 (m, 383H, Ar), 5.62 (s, 1H, H-1<sup>d</sup>), 5.57 – 5.55 (m, 14H, H-1<sup>b1-b14</sup>), 5.51 (d,  $J = 1.3$  Hz, 1H, H-2<sup>d</sup>), 5.48 (br s, 14H, H-2<sup>b1-b14</sup>), 5.33 – 5.29 (m, 13H, H-2<sup>a,c1-c3,c6-c14</sup>), 5.28 – 5.24 (m, 2H, H-5<sup>b4,b5</sup>), 5.20 (d,  $J = 1.8$  Hz, 1H, H-2<sup>c4</sup>/H-2<sup>c5</sup>), 5.19 (d,  $J = 1.6$  Hz, 1H, H-2<sup>c4</sup>/H-2<sup>c5</sup>), 5.11 (s, 1H, H-1<sup>a</sup>), 5.06 – 5.03 (m, 11H, H-1<sup>c1-c3,c6-c14</sup>), 4.93 (br s, 2H, H-1<sup>c4,c5</sup>), 4.73 – 4.13 (m, 178H,  $\text{PhCH}_2$ , H-3<sup>a,c1-c14</sup>, H-4<sup>a,b1-b14,c1-c14,d</sup>, H-5<sup>a,c1-c14</sup>, H-6<sup>d</sup>), 4.07 (d,  $J = 5.9$  Hz, 1H, H-3<sup>d</sup>), 4.02 – 3.99 (m, 14H, H-3<sup>b1-b14</sup>), 3.85 – 3.56 (m, 70H, H-5<sup>b1-b3,b6-b14,d</sup>, H-6<sup>a,b1-b14,c1-c14</sup>, octyl OCH<sub>2</sub>), 3.52 – 3.48 (m, 2H, H-6<sup>b4,b5</sup>), 3.41 (dt,  $J = 9.7, 6.6$  Hz, 1H, octyl OCH<sub>2</sub>), 2.47 – 2.31 (m, 8H, Lev CH<sub>2</sub>), 1.914 (s, 3H, Lev CH<sub>3</sub>), 1.906 (s, 3H, Lev CH<sub>3</sub>), 1.59 – 1.54 (m, 2H, octyl CH<sub>2</sub>), 1.29 – 1.23 (m, 10H, octyl CH<sub>2</sub>), 0.85 (t,  $J = 7.0$  Hz, 3H, octyl CH<sub>3</sub>);  $^{13}\text{C}$  NMR (150 MHz,  $\text{CDCl}_3$ )  $\delta$  206.16 ( $\times 2$ , Lev C=O), 172.23 ( $\times 2$ , Lev C=O), 166.19 (C=O), 165.67 (C=O), 165.50 ( $\times 13$ , C=O), 165.45 (C=O), 165.41 (C=O), 165.33 ( $\times 13$ , C=O), 165.29 (C=O), 138.47 (Ar), 138.43 (Ar), 138.23 (Ar), 138.18 (Ar), 138.14 (Ar), 138.07 (Ar), 138.03 (Ar), 138.00 (Ar), 137.98 (Ar), 137.88 (Ar), 137.87 (Ar), 137.82 (Ar), 137.80 (Ar), 137.72 (Ar), 137.71 (Ar), 137.63 (Ar), 133.35 (Ar), 133.06 (Ar), 129.98 (Ar), 129.94 (Ar), 129.88 (Ar), 129.66 (Ar), 129.62 (Ar), 129.56 (Ar), 129.54 (Ar), 129.52 (Ar), 129.49 (Ar), 129.45 (Ar), 129.43 (Ar), 128.59 (Ar), 128.56 (Ar), 128.45 (Ar), 128.42 (Ar), 128.36 (Ar), 128.33 (Ar), 128.30 (Ar), 128.26 (Ar), 128.15 (Ar), 128.12 (Ar), 128.08 (Ar), 127.94 (Ar), 127.90 (Ar), 127.86 (Ar), 127.77 (Ar), 127.71 (Ar), 127.65 (Ar), 127.53 (Ar), 127.50 (Ar), 127.45 (Ar), 127.43 (Ar), 127.40 (Ar), 127.37 (Ar), 107.14 (C-1<sup>c4</sup>/C-1<sup>c5</sup>), 107.09 (C-1<sup>c4</sup>/C-1<sup>c5</sup>), 107.04 ( $\times 11$ , C-1<sup>c1-c3,c3-c13</sup>), 106.92 (C-1<sup>c14</sup>), 106.74 (C-1<sup>d</sup>), 106.63 ( $\times 11$ , C-1<sup>b2,b3,b6-b14</sup>), 106.59 (C-1<sup>b4</sup>/C-1<sup>b5</sup>), 106.56 (C-1<sup>b4</sup>/C-1<sup>b5</sup>), 106.24 (C-1<sup>b1</sup>), 106.00 (C-1<sup>a</sup>), 83.91, 83.85, 83.79, 83.70, 83.61, 83.54, 83.32, 83.25, 82.97, 82.77, 82.53, 82.48, 82.41, 82.34, 82.18, 82.14, 82.08, 81.98, 81.90, 75.91 (C-5<sup>d</sup>), 74.23, 74.11, 73.99, 73.93, 73.89, 73.74, 74.57, 73.49, 73.44, 73.39, 73.37, 73.33, 72.90, 72.77,

72.71, 72.66, 72.63, 72.12, 72.07, 71.82, 71.73, 71.60, 71.56, 71.37, 71.34, 71.06, 69.84, 69.54, 69.47, 67.63 (octyl OCH<sub>2</sub>), 67.00 (C-6<sup>b4</sup>/C-6<sup>b5</sup>), 66.95 (C-6<sup>b4</sup>/C-6<sup>b5</sup>), 64.93 (C-6<sup>d</sup>), 38.03 (×2, Lev CH<sub>2</sub>), 31.98 (octyl CH<sub>2</sub>), 29.63 (×2, Lev CH<sub>3</sub>), 29.58 (octyl CH<sub>2</sub>), 29.55 (octyl OCH<sub>2</sub>CH<sub>2</sub>), 29.39 (octyl CH<sub>2</sub>), 28.11 (×2, Lev CH<sub>2</sub>), 26.23 (octyl CH<sub>2</sub>), 22.80 (octyl CH<sub>2</sub>), 14.25 (octyl CH<sub>3</sub>); MALDI-TOF MS Calcd for C<sub>821</sub>H<sub>802</sub>O<sub>186</sub>Na [M + Na]<sup>+</sup> *m/z*: 13668.0, found: 13668.5.

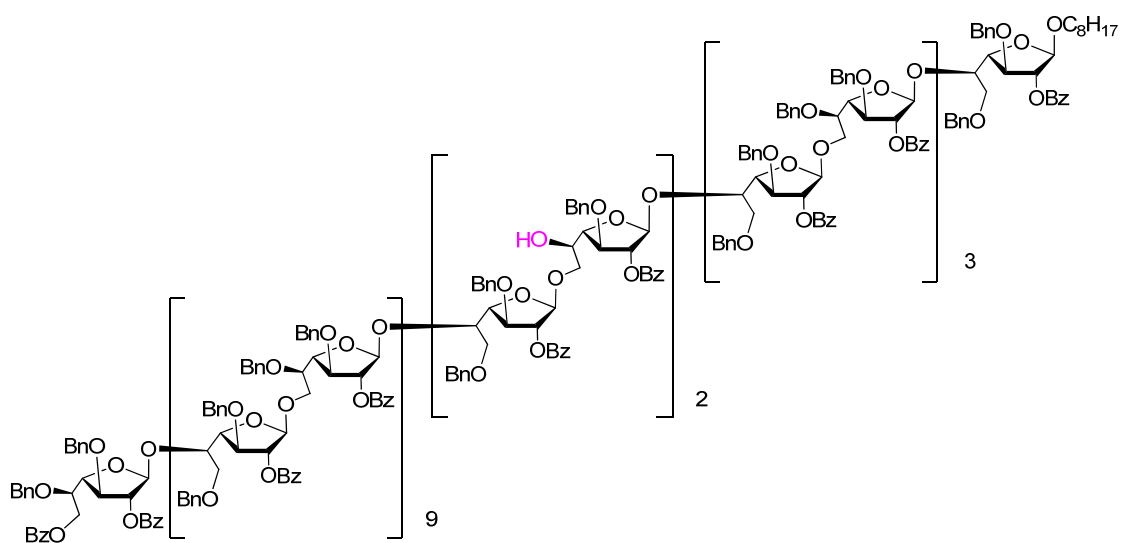

**Octyl 2,6-di-*O*-benzoyl-3,5-di-*O*-benzyl-β-D-galactofuranosyl<sup>d</sup>-(1→5)-2-*O*-benzoyl-3,6-di-*O*-benzyl-β-D-galactofuranosyl<sup>c14</sup>-(1→6)-2-*O*-benzoyl-3,5-di-*O*-benzyl-β-D-galactofuranosyl<sup>b14</sup>-(1→5)-2-*O*-benzoyl-3,6-di-*O*-benzyl-β-D-galactofuranosyl<sup>c13</sup>-(1→6)-2-*O*-benzoyl-3,5-di-*O*-benzyl-β-D-galactofuranosyl<sup>b13</sup>-(1→5)-2-*O*-benzoyl-3,6-di-*O*-benzyl-β-D-galactofuranosyl<sup>c12</sup>-(1→6)-2-*O*-benzoyl-3,5-di-*O*-benzyl-β-D-galactofuranosyl<sup>b12</sup>-(1→5)-2-*O*-benzoyl-3,6-di-*O*-benzyl-β-D-galactofuranosyl<sup>c11</sup>-(1→6)-2-*O*-benzoyl-3,5-di-*O*-benzyl-β-D-galactofuranosyl<sup>b11</sup>-(1→5)-2-*O*-benzoyl-3,6-di-*O*-benzyl-β-D-galactofuranosyl<sup>c10</sup>-(1→6)-2-*O*-benzoyl-3,5-di-*O*-benzyl-β-D-galactofuranosyl<sup>b10</sup>-(1→5)-2-*O*-benzoyl-3,6-di-*O*-benzyl-β-D-galactofuranosyl<sup>c9</sup>-(1→6)-2-*O*-benzoyl-3,5-di-*O*-benzyl-β-D-galactofuranosyl<sup>b9</sup>-(1→5)-2-*O*-benzoyl-3,6-di-*O*-benzyl-β-D-galactofuranosyl<sup>c8</sup>-(1→6)-2-*O*-benzoyl-3,5-di-*O*-benzyl-β-D-galactofuranosyl<sup>b8</sup>-(1→5)-2-*O*-benzoyl-3,6-di-*O*-benzyl-β-D-galactofuranosyl<sup>c7</sup>-(1→6)-2-*O*-benzoyl-3,5-di-*O*-benzyl-β-D-galactofuranosyl<sup>b7</sup>-(1→5)-2-*O*-benzoyl-3,6-di-*O*-benzyl-β-D-galactofuranosyl<sup>c6</sup>-(1→6)-2-*O*-benzoyl-3,5-di-*O*-benzyl-β-D-gal**

actofuranosyl<sup>b6</sup>-(1→5)-2-*O*-benzoyl-3,6-di-*O*-benzyl-β-D-galactofuranosyl<sup>c5</sup>-(1→6)-2-*O*-benzoyl-3-*O*-benzyl-β-D-galactofuranosyl<sup>b5</sup>-(1→5)-2-*O*-benzoyl-3,6-di-*O*-benzyl-β-D-galactofuranosyl<sup>c4</sup>-(1→6)-2-*O*-benzoyl-3-*O*-benzyl-β-D-galactofuranosyl<sup>b4</sup>-(1→5)-2-*O*-benzoyl-3,6-di-*O*-benzyl-β-D-galactofuranosyl<sup>c3</sup>-(1→6)-2-*O*-benzoyl-3,5-di-*O*-benzyl-β-D-galactofuranosyl<sup>b3</sup>-(1→5)-2-*O*-benzoyl-3,6-di-*O*-benzyl-β-D-galactofuranosyl<sup>c2</sup>-(1→6)-2-*O*-benzoyl-3,5-di-*O*-benzyl-β-D-galactofuranosyl<sup>b2</sup>-(1→5)-2-*O*-benzoyl-3,6-di-*O*-benzyl-β-D-galactofuranosyl<sup>c1</sup>-(1→6)-2-*O*-benzoyl-3,5-di-*O*-benzyl-β-D-galactofuranosyl<sup>b1</sup>-(1→5)-2-*O*-benzoyl-3,6-di-*O*-benzyl-β-D-galactofuranoside<sup>a</sup> (**2**): To a solution of **25** (260 mg, 19.06 μmol) in THF (2 mL) and CH<sub>3</sub>OH (0.2 mL) was added hydrazine acetate (35.1 mg, 381.1 μmol), the resulting mixture was stirred at room temperature for 20 h, quenched with acetone (0.5 mL) and stirred for another 30 min. After removal of the solvent, the residue was dissolved in EtOAc (30 mL), washed with a saturated aqueous NaHCO<sub>3</sub> solution (10 mL) and brine (10 mL), dried over Na<sub>2</sub>SO<sub>4</sub>, filtered, and concentrated. The desired product was purified by column chromatography on silica gel (petroleum ether/acetone, 1.8:1) to afford **2** (218.4 mg, 85%) as white foam. *R*<sub>f</sub> = 0.47 (petroleum ether/acetone, 1.3:1); [α]<sub>D</sub><sup>30</sup> -64.7 (*c* 0.4, CH<sub>2</sub>Cl<sub>2</sub>); <sup>1</sup>H NMR (600 MHz, CDCl<sub>3</sub>) δ 8.02 – 7.92 (m, 60H, Ar), 7.86 – 7.85 (m, 2H, Ar), 7.57 – 6.95 (m, 383H, Ar), 5.62 (s, 1H, H-1<sup>d</sup>), 5.57 – 5.53 (m, 14H, H-1<sup>b1-b14</sup>), 5.51 (br s, 2H, H-2<sup>d</sup>, H-2<sup>b4</sup>/H-2<sup>b5</sup>), 5.50 (s, 1H, H-2<sup>b4</sup>/H-2<sup>b5</sup>), 5.48 – 5.47 (m, 12H, H-2<sup>b1-b3, b6-b14</sup>), 5.33 – 5.30 (m, 13H, H-2<sup>a, c1-c13, c6-c14</sup>), 5.24 (br s, 2H, H-2<sup>c4, c5</sup>), 5.11 (s, 1H, H-1<sup>a</sup>), 5.06 – 5.03 (m, 12H, H-1<sup>c1-c3, c6-c14</sup>), 4.98 (s, 1H, H-1<sup>c4</sup>/H-1<sup>c5</sup>), 4.97 (s, 1H, H-1<sup>c4</sup>/H-1<sup>c5</sup>), 4.73 – 4.09 (m, 180H, PhCH<sub>2</sub>, H-3<sup>a, b4, b5, c1-c14</sup>, H-4<sup>a, b1-b14, c1-c14, d</sup>, H-5<sup>a, c1-c14</sup>, H-6<sup>d</sup>), 4.07 (d, *J* = 5.9 Hz, 1H, H-3<sup>d</sup>), 4.02 – 3.99 (m, 12H, H-3<sup>b1-b3, b6-b14</sup>), 3.85 – 3.57 (m, 72H, H-5<sup>b1-b14, d</sup>, H-6<sup>a, b1-b14, c1-c14</sup>, octyl OCH<sub>2</sub>), 3.43 – 3.37 (m, 3H, H-6<sup>b4, b5</sup>, octyl OCH<sub>2</sub>), 2.75 (d, *J* = 3.7 Hz, 1H, -OH), 2.73 (d, *J* = 3.7 Hz, 1H, -OH), 1.58 – 1.54 (m, 2H, octyl CH<sub>2</sub>), 1.28 – 1.23 (m, 10H, octyl CH<sub>2</sub>), 0.85 (t, *J* = 6.8 Hz, 3H, octyl CH<sub>3</sub>); <sup>13</sup>C NMR (150 MHz, CDCl<sub>3</sub>) δ 166.18 (C=O), 165.82 (C=O), 165.78 (C=O), 165.67 (C=O), 165.50 (C=O), 165.47 (C=O), 165.45 (C=O), 165.41 (C=O), 165.37 (C=O), 165.3 (C=O), 138.47 (Ar), 138.43 (Ar), 138.22 (Ar), 138.16 (Ar), 138.14 (Ar), 138.07 (Ar), 138.03 (Ar), 137.87 (Ar), 137.81 (Ar), 137.79

(Ar), 137.74 (Ar), 137.72 (Ar), 137.63 (Ar), 133.47 (Ar), 133.35 (Ar), 133.06 (Ar), 129.97 (Ar), 129.94 (Ar), 129.66 (Ar), 129.61 (Ar), 129.58 (Ar), 129.56 (Ar), 129.53 (Ar), 129.51 (Ar), 129.37 (Ar), 128.58 (Ar), 128.56 (Ar), 128.45 (Ar), 128.41 (Ar), 128.36 (Ar), 128.33 (Ar), 128.30 (Ar), 128.25 (Ar), 128.15 (Ar), 128.12 (Ar), 128.08 (Ar), 128.01 (Ar), 127.98 (Ar), 127.96 (Ar), 127.94 (Ar), 127.90 (Ar), 127.79 (Ar), 127.76 (Ar), 127.71 (Ar), 127.65 (Ar), 127.52 (Ar), 127.50 (Ar), 127.45 (Ar), 127.43 (Ar), 127.40 (Ar), 127.37 (Ar), 107.25 (C-1), 107.23 (C-1), 107.03 (C-1), 106.92 (C-1<sup>c14</sup>), 106.80 (C-1), 106.73 (C-1<sup>d</sup>), 106.62 (C-1), 106.59 (C-1), 106.49 (C-1), 106.24 (C-1<sup>b1</sup>), 106.00 (C-1<sup>a</sup>), 83.92, 83.85, 83.79, 83.70, 83.61, 83.56, 83.53, 83.42, 83.32, 83.25, 83.18, 82.96, 82.94, 82.85, 82.77, 82.53, 82.48, 82.41, 82.33, 82.18, 82.07, 81.98, 81.94, 81.89, 75.91 (C-5<sup>d</sup>), 74.23, 74.07, 73.98, 73.93, 73.89, 73.73, 73.49, 73.44, 73.36, 73.33, 73.09, 72.89, 72.84, 72.71, 72.66, 72.37, 72.34, 72.11, 72.07, 71.73, 71.59, 71.55, 71.27, 71.06, 70.31, 70.28, 69.89, 69.86, 69.83, 69.54, 69.46, 67.63 (octyl OCH<sub>2</sub>), 64.93 (C-6<sup>d</sup>), 31.97 (octyl CH<sub>2</sub>), 29.58 (octyl CH<sub>2</sub>), 29.54 (octyl OCH<sub>2</sub>CH<sub>2</sub>), 29.38 (octyl CH<sub>2</sub>), 26.22 (octyl CH<sub>2</sub>), 22.80 (octyl CH<sub>2</sub>), 14.24 (octyl CH<sub>3</sub>); MALDI-TOF MS Calcd for C<sub>811</sub>H<sub>790</sub>O<sub>182</sub>Na [M + Na]<sup>+</sup> *m/z*: 13471.8, found: 13473.8.

### Synthesis of Araf<sub>31</sub> donor 3:

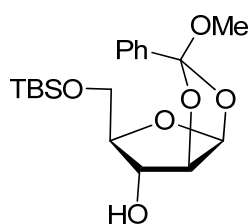

#### 1,2-*O*-( $\alpha$ -Methoxybenzylidene)-5-*O*-*tert*-butyldimethylsilyl- $\beta$ -D-arabinofuranose

**(26b)**: To a stirred solution of **26a**<sup>2</sup> (20.0 g, 42 mmol) in anhydrous CH<sub>2</sub>Cl<sub>2</sub> (50 mL) was added AcBr (9.3 mL, 126 mmol) and anhydrous CH<sub>3</sub>OH (4.6 mL, 113 mmol) at 0 °C. The reaction mixture was stirred for 3 h at room temperature, and then 2,6-lutidine (24.5 mL, 210 mmol) and anhydrous CH<sub>3</sub>OH (17 mL, 420 mmol) was added dropwise at 0 °C. After stirring for 24 h at room temperature, the solvent was evaporated *in vacuo*. The residue was purified by silica gel column chromatography (petroleum ether/acetone, 15:1, containing 0.2% Et<sub>3</sub>N) to give a light yellow syrup, which was dissolved in CH<sub>3</sub>OH (150 mL). Then CH<sub>3</sub>ONa (5.0 M in CH<sub>3</sub>OH) was added to adjust pH to ~9, the reaction mixture was stirred overnight, and neutralized by the addition of Dowex<sup>®</sup>50WX4 ion-exchange resin. The solution was filtered and the filtrate was evaporated *in vacuo*, the residue was purified by column chromatography on silica gel (petroleum ether/acetone, 2.5:1, containing 0.2% Et<sub>3</sub>N) to afford a light yellow syrup (7.5 g, 28.0 mmol), which was dissolved in pyridine (50 mL), followed by the addition of Et<sub>3</sub>N (9.8 mL, 70 mmol) and a catalytic amount of DMAP (34.2 mg, 0.28 mmol), the resulting mixture was then added TBSCl (4.64 g, 30.8 mmol) at 0 °C. 30 min later, the reaction solution was warmed to room temperature and stirred for 5 h. Then the mixture was added CH<sub>3</sub>OH (1 mL) and stirred for another 30 min. The solvent was evaporated *in vacuo* and the residue was purified by column chromatography on silica gel (petroleum ether/ ethyl acetate, 6:1, containing 0.2% Et<sub>3</sub>N) to yield **26b** (9.16 g, 57% for four steps) as light yellow syrup.  $R_f = 0.26$  (petroleum ether/ethyl acetate, 3:1);  $[\alpha]_D^{30} -17.6$  ( $c$  2.1, CH<sub>2</sub>Cl<sub>2</sub>); <sup>1</sup>H NMR (400 MHz, CDCl<sub>3</sub>)  $\delta$  7.59 – 7.57 (m, 2H, Ar), 7.37 – 7.36 (m, 3H, Ar), 6.20 (d,  $J = 4.2$  Hz, 1H, H-1), 4.84 (d,  $J = 4.2$  Hz, 1H, H-2), 4.32 (d,  $J = 3.7$  Hz, 1H, H-3), 4.05 (dd,  $J = 9.6, 5.5$  Hz, 1H, H-4), 3.48 (dd,  $J = 10.0, 5.5$  Hz, 1H, H-5a), 3.25 (t,  $J = 9.8$  Hz, 1H,



H-5b), 3.15 (s, 3H, -OCH<sub>3</sub>), 1.98 (br s, 1H, -OH), 0.76 (s, 9H, *t*-Bu), -0.16 (s, 3H, CH<sub>3</sub>), -0.18 (s, 3H, CH<sub>3</sub>); <sup>13</sup>C NMR (100 MHz, CDCl<sub>3</sub>) δ 136.31 (Ar), 129.47 (Ar), 128.28 (Ar), 126.44 (Ar), 123.15 (PhC), 106.24 (C-1), 89.05 (C-4), 87.23 (C-2), 76.29 (C-3), 63.12 (C-5), 50.92 (-OCH<sub>3</sub>), 25.94 (*t*-Bu), 18.32 (*t*-Bu), -5.45 (CH<sub>3</sub>), -5.52 (CH<sub>3</sub>); HRMS (ESI) Calcd for C<sub>19</sub>H<sub>30</sub>O<sub>6</sub>SiNa [M + Na]<sup>+</sup>: 405.1704, found: 405.1698.

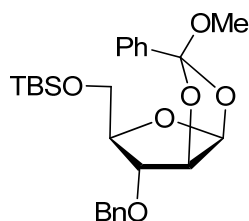

**1,2-*O*-( $\alpha$ -Methoxybenzylidene)-3-*O*-benzyl-5-*O*-*tert*-butyldimethylsilyl- $\beta$ -D-arabinofuranose (26c):** To a solution of **26b** (7.6 g, 19.9 mmol) and BnBr (2.8 mL, 23.8 mmol) in anhydrous DMF (40 mL) was slowly added NaH (0.87 g, 21.9 mmol, 60% in mineral oil) at 0 °C. The reaction mixture was slowly warmed to room temperature and stirred for 1 h, quenched with ice water, and extracted with CH<sub>2</sub>Cl<sub>2</sub> (2 × 150 mL). The combined organic layer, after being washed with a saturated aqueous NH<sub>4</sub>Cl solution (150 mL) and brine (150 mL), was dried over Na<sub>2</sub>SO<sub>4</sub>, filtered, and concentrated. The residue was purified by column chromatography on silica gel (petroleum ether/ethyl acetate, 30:1) to afford **26c** (8.1 g, 86%) as light yellow syrup.  $R_f$  = 0.43 (petroleum ether/ethyl acetate, 7:1);  $[\alpha]_D^{30}$  -35.4 (*c* 2.3, CH<sub>2</sub>Cl<sub>2</sub>); <sup>1</sup>H NMR (400 MHz, CDCl<sub>3</sub>) δ 7.58 – 7.55 (m, 2H, Ar), 7.37 – 7.27 (m, 8H, Ar), 6.21 (d, *J* = 4.3 Hz, 1H, H-1), 4.94 (d, *J* = 4.3 Hz, 1H, H-2), 4.59 (d, *J* = 11.9 Hz, 1H, PhCH<sub>2</sub>), 4.55 (d, *J* = 11.9 Hz, 1H, PhCH<sub>2</sub>), 4.05 (dd, *J* = 9.6, 5.5 Hz, 1H, H-4), 4.06 (s, 1H, H-3), 3.46 (dd, *J* = 10.0, 5.4 Hz, 1H, H-5a), 3.20 (t, *J* = 9.9 Hz, 1H, H-5b), 3.15 (s, 3H, -OCH<sub>3</sub>), 0.75 (s, 9H, *t*-Bu), -0.18 (s, 3H, CH<sub>3</sub>), -0.21 (s, 3H, CH<sub>3</sub>); <sup>13</sup>C NMR (100 MHz, CDCl<sub>3</sub>) δ 137.46 (Ar), 136.36 (Ar), 129.44 (Ar), 128.64 (Ar), 128.27 (Ar), 128.03 (Ar), 127.91 (Ar), 126.41 (Ar), 123.06 (PhC), 106.56 (C-1), 86.79 (C-4), 85.51 (C-2), 82.74 (C-3), 71.56 (PhCH<sub>2</sub>), 62.91 (C-5), 50.94 (-OCH<sub>3</sub>), 25.93 (*t*-Bu), 18.27 (*t*-Bu), -5.51 (CH<sub>3</sub>), -5.52 (CH<sub>3</sub>); HRMS (ESI) Calcd for C<sub>26</sub>H<sub>36</sub>O<sub>6</sub>SiNa [M + Na]<sup>+</sup>: 495.2173, found: 495.2179.

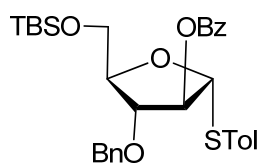

***p*-Tolyl 2-*O*-benzoyl-3-*O*-benzyl-5-*O*-*tert*-butyldimethylsilyl-1-thio- $\alpha$ -D-arabinofuranoside (**26**):** To a mixture of **26c** (8.1 g, 17.1 mmol), *p*-thiocresol (2.55 g, 20.5 mmol) and freshly activated 4 Å molecular sieves (2.5 g) in CH<sub>2</sub>Cl<sub>2</sub> (25 mL) under argon atmosphere was added a catalytic amount of SnCl<sub>4</sub> (1.7 mL, 1.7 mmol, 1.0 M in CH<sub>2</sub>Cl<sub>2</sub>) at 0 °C. After stirring for 30 min at the same temperature, the reaction was quenched by the addition of Et<sub>3</sub>N (2 mL), filtered and concentrated. The crude residue was purified by column chromatography on silica gel (petroleum ether/acetone, 100:1) to yield **26** (6.0 g, 62%) as colorless syrup. *R*<sub>f</sub> = 0.57 (petroleum ether/ethyl acetate, 7:1); [α]<sub>D</sub><sup>30</sup> +108.6 (*c* 1.0, CH<sub>2</sub>Cl<sub>2</sub>); <sup>1</sup>H NMR (400 MHz, CDCl<sub>3</sub>) δ 8.03 – 8.01 (m, 2H, Ar), 7.59 (t, *J* = 7.4 Hz, 1H, Ar), 7.47 – 7.43 (m, 4H, Ar), 7.39 – 7.25 (m, 5H, Ar), 7.12 (d, *J* = 8.0 Hz, 2H, Ar), 5.62 (s, 1H, H-1), 5.58 (t, *J* = 1.6 Hz, 1H, H-2), 4.82 (d, *J* = 12.1 Hz, 1H, PhCH<sub>2</sub>), 4.65 (d, *J* = 12.0 Hz, 1H, PhCH<sub>2</sub>), 4.45 (dd, *J* = 9.5, 4.7 Hz, 1H, H-4), 4.16 – 4.15 (m, 1H, H-3), 3.81 (d, *J* = 4.5 Hz, 2H, H-5a, H-5b), 2.33 (s, 3H, tolyl CH<sub>3</sub>), 0.85 (s, 9H, *t*-Bu), 0.03 (s, 3H, CH<sub>3</sub>), 0.02 (s, 3H, CH<sub>3</sub>); <sup>13</sup>C NMR (100 MHz, CDCl<sub>3</sub>) δ 165.51 (C=O), 137.75 (Ar), 137.68 (Ar), 133.54 (Ar), 132.63 (Ar), 130.83 (Ar), 129.94 (Ar), 129.80 (Ar), 129.56 (Ar), 128.57 (Ar), 128.54 (Ar), 128.03 (Ar), 127.92 (Ar), 91.61 (C-1), 83.63 (C-4), 83.02 (C-3), 82.63 (C-2), 72.38 (PhCH<sub>2</sub>), 62.51 (C-5), 25.98 (*t*-Bu), 21.925 (tolyl CH<sub>3</sub>), 18.43 (*t*-Bu), -5.21 (CH<sub>3</sub>), -5.29 (CH<sub>3</sub>); HRMS (ESI) Calcd for C<sub>32</sub>H<sub>40</sub>O<sub>5</sub>SSiNa [M + Na]<sup>+</sup>: 587.2256, found: 587.2266.

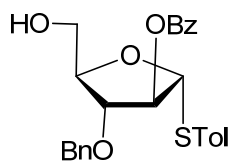

***p*-Tolyl 2-*O*-benzoyl-3-*O*-benzyl-1-thio- $\alpha$ -D-arabinofuranoside (**27**):** To solution of **26** (3.3 g, 5.84 mmol) in THF (20 mL) was added AcOH (670 μL, 11.7 mmol) and

TBAF (11.7 mL, 11.7 mmol, 1.0 M in THF), the resulting mixture was stirred overnight at 35 °C, and the solvent was evaporated *in vacuo* to give a residue, which was dissolved in EtOAc (100 mL). After being washed with a saturated aqueous NaHCO<sub>3</sub> solution (50 mL) and brine (50 mL), the organic layer was dried over Na<sub>2</sub>SO<sub>4</sub>, filtered, and concentrated. The residue was purified by column chromatography on silica gel (petroleum ether/acetone, 6:1) to afford **27** (2.42 g, 92%) as colorless syrup. *R<sub>f</sub>* = 0.24 (petroleum ether/ethyl acetate, 3:1); [ $\alpha$ ]<sub>D</sub><sup>30</sup> +147.3 (*c* 1.0, CH<sub>2</sub>Cl<sub>2</sub>); <sup>1</sup>H NMR (400 MHz, CDCl<sub>3</sub>)  $\delta$  8.01 – 8.00 (m, 2H, Ar), 7.60 – 7.56 (m, 1H, Ar), 7.46 – 7.42 (m, 4H, Ar), 7.38 – 7.27 (m, 5H, Ar), 7.12 (d, *J* = 7.9 Hz, 2H, Ar), 5.61 (s, 1H, H-1), 5.55 (t, *J* = 1.5 Hz, 1H, H-2), 4.84 (d, *J* = 12.0 Hz, 1H, PhCH<sub>2</sub>), 4.63 (d, *J* = 12.0 Hz, 1H, PhCH<sub>2</sub>), 4.51 – 4.48 (m, 1H, H-4), 4.17 (dd, *J* = 5.5, 0.7 Hz, 1H, H-3), 3.90 (d, *J* = 12.1 Hz, 1H, H-5a), 3.73 – 3.67 (m, 1H, H-5b), 2.32 (s, 3H, tolyl CH<sub>3</sub>), 1.81 (d, *J* = 3.3 Hz, 1H, -OH); <sup>13</sup>C NMR (100 MHz, CDCl<sub>3</sub>)  $\delta$  165.48 (C=O), 138.08 (Ar), 137.54 (Ar), 133.65 (Ar), 132.92 (Ar), 130.39 (Ar), 129.94 (Ar), 129.89 (Ar), 129.40 (Ar), 128.67 (Ar), 128.62 (Ar), 128.08 (Ar), 128.03 (Ar), 91.98 (C-1), 83.22 (C-4), 82.84 (C-3), 82.45 (C-2), 72.68 (PhCH<sub>2</sub>), 61.78 (C-5), 21.27 (tolyl CH<sub>3</sub>); HRMS (ESI) Calcd for C<sub>26</sub>H<sub>26</sub>O<sub>5</sub>SNa [M + Na]<sup>+</sup>: 473.1393, found: 473.1396.

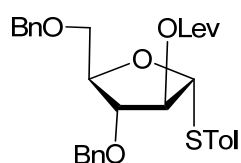

***p*-Tolyl 2-*O*-levulinoyl-3,5-di-*O*-benzyl-1-thio- $\alpha$ -D-arabinofuranoside (**29**):** To a solution of **29a**<sup>3</sup> (7.5 g, 15.7 mmol) in CH<sub>3</sub>OH (30 mL) was added CH<sub>3</sub>ONa (5.0 M in CH<sub>3</sub>OH) to adjust pH to ~9, the reaction mixture was stirred for 2 h at room temperature, and neutralized by the addition of Dowex<sup>®</sup>50WX4 ion-exchange resin. The solution was filtered and concentrated to give a residue, which was dissolved in anhydrous CH<sub>2</sub>Cl<sub>2</sub> (30 mL). To the resulting mixture was added EDC·HCl (4.5 g, 23.6 mmol) and DMAP (195 mg, 1.6 mmol), followed by the addition of Levulinoyl acid (1.9 mL, 18.8 mmol) at 0 °C. After stirring for 24 h at room temperature, the reaction mixture was diluted with CH<sub>2</sub>Cl<sub>2</sub> (30 mL) and washed with a saturated aqueous



**5)-2-*O*-benzoyl-3-*O*-benzyl-1-thio- $\alpha$ -D-arabinofuranoside<sup>a</sup> (17):** A mixture of **26** (526.5 mg, 0.932 mmol), TTBP (1.25 g, 5.05 mmol) and freshly activated 4 Å molecular sieves (7.0 g) in anhydrous CH<sub>2</sub>Cl<sub>2</sub> (36 mL) under argon atmosphere was stirred for 20 min at room temperature, and cooled to -78 °C. 5 min later, stoichiometric *p*-TolSCl (128.6  $\mu$ L, 0.932 mmol) was added, followed by dropwise addition of AgOTf (4.7 mL, 1.864 mmol, 0.4 mol/L in anhydrous toluene/CH<sub>2</sub>Cl<sub>2</sub>, 3:1). After another 5 min, a solution of **27** (400.0 mg, 0.888 mmol) in anhydrous CH<sub>2</sub>Cl<sub>2</sub> (3 mL) was slowly added. The resulting mixture was stirred at -78 °C for 10 min, warmed to room temperature, and cooled back to -78 °C. 5 min later, stoichiometric *p*-TolSCl (122.5  $\mu$ L, 0.888 mmol) was added, followed by dropwise addition of AgOTf (4.4 mL, 1.776 mmol, 0.4 mol/L in anhydrous toluene/CH<sub>2</sub>Cl<sub>2</sub>, 3:1). After another 5 min, a solution of **27** (380.0 mg, 0.843 mmol) in anhydrous CH<sub>2</sub>Cl<sub>2</sub> (3 mL) was slowly added. The resulting mixture was stirred at -78 °C for 10 min, warmed to room temperature, and cooled back to -78 °C. 5 min later, stoichiometric *p*-TolSCl (116.3  $\mu$ L, 0.843 mmol) was added, followed by dropwise addition of AgOTf (4.2 mL, 1.686 mmol, 0.4 mol/L in anhydrous toluene/CH<sub>2</sub>Cl<sub>2</sub>, 3:1). After another 5 min, a solution of **27** (360.0 mg, 0.799 mmol) in anhydrous CH<sub>2</sub>Cl<sub>2</sub> (3 mL) was slowly added. The resulting mixture was stirred at -78 °C for 10 min, warmed to room temperature, and cooled back to -78 °C. 5 min later, stoichiometric *p*-TolSCl (110.2  $\mu$ L, 0.799 mmol) was added, followed by dropwise addition of AgOTf (4.0 mL, 1.598 mmol, 0.4 mol/L in anhydrous toluene/CH<sub>2</sub>Cl<sub>2</sub>, 3:1). After another 5 min, a solution of **27** (336.0 mg, 0.746 mmol) in anhydrous CH<sub>2</sub>Cl<sub>2</sub> (3 mL) was slowly added. The resulting mixture was stirred at -78 °C for 10 min, warmed to room temperature, and cooled back to -78 °C. 5 min later, stoichiometric *p*-TolSCl (102.9  $\mu$ L, 0.746 mmol) was added, followed by dropwise addition of AgOTf (3.7 mL, 1.492 mmol, 0.4 mol/L in anhydrous toluene/CH<sub>2</sub>Cl<sub>2</sub>, 3:1). After another 5 min, a solution of **27** (400.0 mg, 0.888 mmol) in anhydrous CH<sub>2</sub>Cl<sub>2</sub> (3 mL) was slowly added. The resulting mixture was stirred at -78 °C for 10 min, warmed to room temperature, and quenched with Et<sub>3</sub>N (1 mL) and filtered through Celite. After removal of the solvent, the desired product was purified by

column chromatography on silica gel (petroleum ether/acetone, 6:1) to afford **17** (1.20 g, 73%) as white foam.  $R_f = 0.34$  (petroleum ether/ethyl acetate, 3:1);  $[\alpha]_D^{30} +103.9$  ( $c$  0.6,  $\text{CH}_2\text{Cl}_2$ );  $^1\text{H NMR}$  (600 MHz,  $\text{CDCl}_3$ )  $\delta$  8.03 – 7.98 (m, 12H, Ar), 7.57 (t,  $J = 7.4$  Hz, 1H, Ar), 7.54 – 7.51 (m, 5H, Ar), 7.44 – 7.38 (m, 14H, Ar), 7.34 (d,  $J = 7.2$  Hz, 2H, Ar), 7.27 (t,  $J = 7.3$  Hz, 1H, Ar), 7.22 – 7.13 (m, 26H, Ar), 7.06 (d,  $J = 8.0$  Hz, 2H, Ar), 5.61 (s, 1H, H-1<sup>a</sup>), 5.57 (t,  $J = 1.8$  Hz, 1H, H-2<sup>a</sup>), 5.40 (d,  $J = 1.1$  Hz, 1H, H-2), 5.38 (d,  $J = 1.1$  Hz, 1H, H-2), 5.37 (d,  $J = 1.1$  Hz, 2H, H-2), 5.36 (d,  $J = 1.0$  Hz, 1H, H-2<sup>f</sup>), 5.24 (s, 1H, H-1), 5.23 (s, 1H, H-1), 5.21 (br s, 2H, H-1), 5.20 (s, 1H, H-1), 4.77 (d,  $J = 12.0$  Hz, 1H,  $\text{PhCH}_2$ ), 4.64 – 4.60 (m, 2H,  $\text{PhCH}_2$ ), 4.58 – 4.53 (m, 5H, H-4<sup>a</sup>,  $\text{PhCH}_2$ ), 4.49 (d,  $J = 12.2$  Hz, 1H,  $\text{PhCH}_2$ ), 4.45 – 4.42 (m, 4H,  $\text{PhCH}_2$ ), 4.27 (dd,  $J = 5.5, 1.2$  Hz, 1H, H-3<sup>a</sup>), 4.17 (dd,  $J = 9.1, 3.8$  Hz, 1H, H-4), 4.13 – 4.06 (m, 7H, H-3  $\times$  4, H-4  $\times$  4), 4.01 (dd,  $J = 9.3, 4.3$  Hz, 1H, H-4<sup>f</sup>), 3.96 – 3.94 (m, 2H, H-3<sup>f</sup>, H-5<sup>a</sup>), 3.85 – 3.80 (m, 4H, H-5  $\times$  4), 3.75 (dd,  $J = 11.3, 3.9$  Hz, 1H, H-5<sup>a</sup>), 3.70 – 3.60 (m, 6H, H-5  $\times$  6), 2.28 (s, 3H, tolyl  $\text{CH}_3$ ), 0.80 (s, 9H, *t*-Bu), -0.02 (s, 3H,  $\text{CH}_3$ ), -0.04 (s, 3H,  $\text{CH}_3$ );  $^{13}\text{C NMR}$  (150 MHz,  $\text{CDCl}_3$ )  $\delta$  165.56 (C=O), 165.44 (C=O), 165.39 (C=O), 165.38 (C=O), 165.37 ( $\times$ 2, C=O), 137.97 (Ar), 137.95 (Ar), 137.90 (Ar), 137.77 (Ar), 137.63 (Ar), 133.48 (Ar), 133.46 (Ar), 133.39 (Ar), 132.56 (Ar), 130.70 (Ar), 129.99 (Ar), 129.93 (Ar), 129.88 (Ar), 129.82 (Ar), 129.68 (Ar), 129.65 (Ar), 129.63 (Ar), 129.51 (Ar), 128.62 (Ar), 128.54 (Ar), 128.41 (Ar), 128.37 (Ar), 128.34 (Ar), 128.02 (Ar), 127.86 (Ar), 127.84 (Ar), 127.83 (Ar), 127.78 (Ar), 127.71 (Ar), 127.67 (Ar), 127.66 (Ar), 127.62 (Ar), 106.29 (C-1), 106.27 ( $\times$ 2, C-1), 106.25 (C-1), 91.52 (C-1<sup>a</sup>), 83.95, 83.40, 83.30, 83.26, 83.13 (C-3<sup>a</sup>), 83.00, 82.45 (C-2<sup>a</sup>), 82.20, 82.17, 82.11, 81.98, 81.93, 81.92, 81.90, 81.75 (C-4<sup>a</sup>), 72.55 ( $\text{PhCH}_2$ ), 72.31 ( $\text{PhCH}_2$ ), 72.23 ( $\text{PhCH}_2$ ), 72.20 ( $\text{PhCH}_2$ ), 72.19 ( $\text{PhCH}_2$ ), 72.06 ( $\text{PhCH}_2$ ), 65.52 ( $\times$ 2, C-5), 65.46 (C-5), 65.45 (C-5), 62.48 (C-5<sup>f</sup>), 25.96 (*t*-Bu), 21.22 (tolyl  $\text{CH}_3$ ), 18.42 (*t*-Bu), -5.23 ( $\text{CH}_3$ ), -5.33 ( $\text{CH}_3$ ); HRMS (ESI) Calcd for  $\text{C}_{127}\text{H}_{130}\text{O}_{30}\text{SSiNa}$   $[\text{M} + \text{Na}]^+$ : 2217.8029, found: 2217.8101.

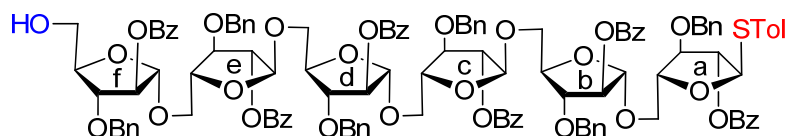

***p*-Tolyl 2-*O*-benzoyl-3-*O*-benzyl- $\alpha$ -D-arabinofuranosyl<sup>f</sup>-(1 $\rightarrow$ 5)-2-*O*-benzoyl-3-*O*-benzyl- $\alpha$ -D-arabinofuranosyl<sup>e</sup>-(1 $\rightarrow$ 5)-2-*O*-benzoyl-3-*O*-benzyl- $\alpha$ -D-arabinofuranosyl<sup>d</sup>-(1 $\rightarrow$ 5)-2-*O*-benzoyl-3-*O*-benzyl- $\alpha$ -D-arabinofuranosyl<sup>c</sup>-(1 $\rightarrow$ 5)-2-*O*-benzoyl-3-*O*-benzyl- $\alpha$ -D-arabinofuranosyl<sup>b</sup>-(1 $\rightarrow$ 5)-2-*O*-benzoyl-3-*O*-benzyl-1-thio- $\alpha$ -D-arabinofuranoside<sup>a</sup> (**12**):** To a solution of **17** (1.0 g, 0.455 mmol) in THF (10 mL) was added AcOH (104  $\mu$ L, 1.82 mmol) and TBAF (1.8 mL, 1.8 mmol, 1.0 M in THF), the resulting mixture was stirred at 35  $^{\circ}$ C for 24 h, and the solvent was evaporated *in vacuo* to give a residue, which was dissolved in EtOAc (80 mL). After being washed with a saturated aqueous NaHCO<sub>3</sub> solution (40 mL) and brine (40 mL), the organic layer was dried over Na<sub>2</sub>SO<sub>4</sub>, filtered, and concentrated. The residue was purified by column chromatography on silica gel (petroleum ether/acetone, 3:1) to afford **12** (872 mg, 92%) as white foam.  $R_f$  = 0.47 (petroleum ether/ethyl acetate, 1.5:1);  $[\alpha]_D^{30}$  +107.9 (*c* 0.5, CH<sub>2</sub>Cl<sub>2</sub>); <sup>1</sup>H NMR (600 MHz, CDCl<sub>3</sub>)  $\delta$  8.03 – 8.00 (m, 10H, Ar), 7.98 – 7.96 (m, 2H, Ar), 7.57 (t,  $J$  = 7.4 Hz, 1H, Ar), 7.54 – 7.51 (m, 5H, Ar), 7.44 – 7.38 (m, 14H, Ar), 7.34 (d,  $J$  = 7.2 Hz, 2H, Ar), 7.27 (t,  $J$  = 7.4 Hz, 1H, Ar), 7.24 – 7.13 (m, 26H, Ar), 7.06 (d,  $J$  = 8.0 Hz, 2H, Ar), 5.61 (s, 1H, H-1<sup>a</sup>), 5.57 (t,  $J$  = 1.8 Hz, 1H, H-2<sup>a</sup>), 5.40 (d,  $J$  = 1.3 Hz, 1H, H-2<sup>b</sup>), 5.38 (d,  $J$  = 1.2 Hz, 1H, H-2), 5.37 (d,  $J$  = 1.2 Hz, 2H, H-2), 5.33 (d,  $J$  = 1.2 Hz, 1H, H-2<sup>f</sup>), 5.24 (s, 1H, H-1<sup>b</sup>), 5.23 (br s, 2H, H-1), 5.22 (s, 1H, H-1), 5.20 (s, 1H, H-1<sup>f</sup>), 4.77 (d,  $J$  = 12.1 Hz, 1H, PhCH<sub>2</sub>), 4.64 – 4.60 (m, 2H, PhCH<sub>2</sub>), 4.58 – 4.54 (m, 5H, H-4<sup>a</sup>, PhCH<sub>2</sub>), 4.49 (d,  $J$  = 12.1 Hz, 1H, PhCH<sub>2</sub>), 4.45 – 4.43 (m, 3H, PhCH<sub>2</sub>), 4.41 (d,  $J$  = 12.2 Hz, 1H, PhCH<sub>2</sub>), 4.27 (dd,  $J$  = 5.5, 1.3 Hz, 1H, H-3<sup>a</sup>), 4.17 (dd,  $J$  = 9.1, 3.8 Hz, 1H, H-4<sup>b</sup>), 4.13 – 4.10 (m, 4H, H-3<sup>b</sup>, H-4<sup>c,d,e</sup>), 4.07 (br s, 3H, H-3<sup>c,d,e</sup>), 4.00 – 3.98 (m, 1H, H-4<sup>f</sup>), 3.95 (dd,  $J$  = 11.4, 4.0 Hz, 1H, H-5<sup>a</sup>), 3.93 (d,  $J$  = 5.5 Hz, 1H, H-3<sup>f</sup>), 3.85 – 3.71 (m, 6H, H-5<sup>a,b,c,d,e,f</sup>), 3.66 – 3.61 (m, 4H, H-5<sup>b,c,d,e</sup>), 3.53 – 3.49 (m, 1H, H-5<sup>f</sup>), 2.27 (s, 3H, tolyl CH<sub>3</sub>), 1.68 (dd,  $J$  = 8.4, 4.3 Hz, 1H, -OH); <sup>13</sup>C NMR (150 MHz, CDCl<sub>3</sub>)  $\delta$  165.56 (C=O), 165.44 (C=O), 165.39 (C=O), 165.37 ( $\times$ 2, C=O), 165.30 (C=O), 137.95 (Ar), 137.77 (Ar), 137.70 (Ar),

137.63 (Ar), 133.57 (Ar), 133.48 (Ar), 133.45 (Ar), 133.39 (Ar), 132.56 (Ar), 130.70 (Ar), 129.98 (Ar), 129.93 (Ar), 129.91 (Ar), 129.82 (Ar), 129.64 (Ar), 129.62 (Ar), 129.53 (Ar), 129.51 (Ar), 128.63 (Ar), 128.53 (Ar), 128.45 (Ar), 128.41 (Ar), 128.37 (Ar), 128.02 (Ar), 127.87 (Ar), 127.82 (Ar), 127.71 (Ar), 127.67 (Ar), 106.38 (C-1), 106.30 (C-1), 106.28 ( $\times 2$ , C-1), 106.25 (C-1), 91.52 (C-1<sup>a</sup>), 83.46, 83.31, 83.28, 83.13 (C-3<sup>a</sup>), 82.89 (C-3<sup>f</sup>), 82.44 (C-2<sup>b</sup>), 82.18, 82.16, 81.98, 81.92, 81.87, 81.74 (C-4<sup>a</sup>), 72.55 (PhCH<sub>2</sub>), 72.31 (PhCH<sub>2</sub>), 72.25 (PhCH<sub>2</sub>), 72.21 (PhCH<sub>2</sub>), 72.20 (PhCH<sub>2</sub>), 72.17 (PhCH<sub>2</sub>), 65.65 (C-5), 65.60 (C-5), 65.55 (C-5), 65.54 (C-5), 65.45 (C-5), 62.03 (C-5<sup>f</sup>), 21.22 (tolyl CH<sub>3</sub>); HRMS (ESI) Calcd for C<sub>121</sub>H<sub>116</sub>O<sub>30</sub>SNa [M + Na]<sup>+</sup>: 2103.7164, found: 2103.7183.

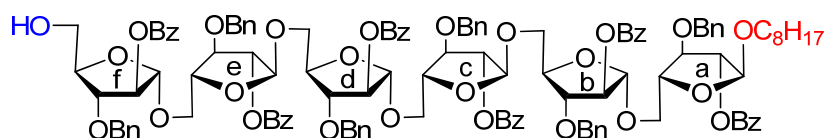

**Octyl 2-*O*-benzoyl-3-*O*-benzyl- $\alpha$ -D-arabinofuranosyl<sup>f</sup>-(1 $\rightarrow$ 5)-2-*O*-benzoyl-3-*O*-benzyl- $\alpha$ -D-arabinofuranosyl<sup>e</sup>-(1 $\rightarrow$ 5)-2-*O*-benzoyl-3-*O*-benzyl- $\alpha$ -D-arabinofuranosyl<sup>d</sup>-(1 $\rightarrow$ 5)-2-*O*-benzoyl-3-*O*-benzyl- $\alpha$ -D-arabinofuranosyl<sup>c</sup>-(1 $\rightarrow$ 5)-2-*O*-benzoyl-3-*O*-benzyl- $\alpha$ -D-arabinofuranosyl<sup>b</sup>-(1 $\rightarrow$ 5)-2-*O*-benzoyl-3-*O*-benzyl- $\alpha$ -D-arabinofuranoside<sup>a</sup> (32):** A mixture of **17** (500 mg, 0.228 mmol), TTBP (68 mg, 0.274 mmol) and freshly activated 4 Å molecular sieves (2.0 g) in anhydrous CH<sub>2</sub>Cl<sub>2</sub> (20 mL) under argon atmosphere was stirred for 20 min at room temperature, and cooled to -78 °C. 5 min later, stoichiometric *p*-TolSCl (31.5  $\mu$ L, 0.228 mmol) was added, followed by dropwise addition of AgOTf (1.1 mL, 0.455 mmol, 0.4 mol/L in anhydrous toluene/CH<sub>2</sub>Cl<sub>2</sub>, 3:1). After another 5 min, 1-octanol (72  $\mu$ L, 0.455 mmol) was added. The reaction mixture was warmed to room temperature in 10 min, quenched with Et<sub>3</sub>N (0.5 mL) and filtered through Celite. After removal of the solvent, the residue was purified by column chromatography on silica gel (petroleum ether/ethyl acetate, 5:1) to give a crude product, which was dissolved in THF (5 mL), followed by the addition of AcOH (52  $\mu$ L, 0.91 mmol) and TBAF (0.9 mL, 0.9 mmol, 1.0 M in THF). The resulting mixture was stirred at 35 °C for 24 h, and the solvent



was evaporated *in vacuo* to give a residue, which was dissolved in EtOAc (50 mL). After being washed with a saturated aqueous NaHCO<sub>3</sub> solution (20 mL) and brine (20 mL), the organic layer was dried over Na<sub>2</sub>SO<sub>4</sub>, filtered, and concentrated. The residue was purified by column chromatography on silica gel (toluene/acetonitrile, 16:1) to afford **32** (409 mg, 86% for two steps) as white foam.  $R_f = 0.53$  (petroleum ether/ethyl acetate, 1.5:1);  $[\alpha]_D^{30} -84.2$  ( $c$  0.6, CH<sub>2</sub>Cl<sub>2</sub>); <sup>1</sup>H NMR (600 MHz, CDCl<sub>3</sub>)  $\delta$  8.04 – 8.00 (m, 10H, Ar), 7.98 – 7.96 (m, 2H, Ar), 7.58 – 7.55 (m, 1H, Ar), 7.54 – 7.51 (m, 5H, Ar), 7.44 – 7.38 (m, 12H, Ar), 7.32 (d,  $J = 7.3$  Hz, 2H, Ar), 7.26 – 7.14 (m, 28H, Ar), 5.43 (d,  $J = 1.3$  Hz, 1H, H-2<sup>b</sup>), 5.39 (d,  $J = 1.5$  Hz, 1H, H-2<sup>a</sup>), 5.38 (d,  $J = 1.3$  Hz, 1H, H-2), 5.37 (d,  $J = 1.3$  Hz, 2H, H-2), 5.33 (d,  $J = 1.3$  Hz, 1H, H-2<sup>b</sup>), 5.27 (s, 1H, H-1<sup>b</sup>), 5.23 (s, 1H, H-1), 5.23 (s, 1H, H-1), 5.22 (s, 1H, H-1), 5.20 (s, 1H, H-1<sup>f</sup>), 5.13 (s, 1H, H-1<sup>a</sup>), 4.77 (d,  $J = 12.0$  Hz, 1H, PhCH<sub>2</sub>), 4.63 – 4.60 (m, 2H, PhCH<sub>2</sub>), 4.57 – 4.54 (m, 4H, PhCH<sub>2</sub>), 4.49 (d,  $J = 12.2$  Hz, 1H, PhCH<sub>2</sub>), 4.45 – 4.43 (m, 3H, PhCH<sub>2</sub>), 4.41 (d,  $J = 12.2$  Hz, 1H, PhCH<sub>2</sub>), 4.33 – 4.31 (m, 1H, H-4<sup>a</sup>), 4.19 – 4.15 (m, 2H, H-4<sup>b</sup>, H-3<sup>a</sup>), 4.14 – 4.09 (m, 4H, H-4<sup>c,d,e</sup>, H-3<sup>b</sup>), 4.07 – 4.06 (m, 3H, H-3<sup>c,d,e</sup>), 4.00 – 3.98 (m, 1H, H-4<sup>f</sup>), 3.93 – 3.90 (m, 2H, H-4<sup>f</sup>, H-5<sup>a</sup>), 3.85 – 3.78 (m, 4H, H-5<sup>b,c,d,e</sup>), 3.75 – 3.70 (m, 3H, H-5<sup>a,f</sup>, octyl OCH<sub>2</sub>), 3.66 – 3.61 (m, 4H, H-5<sup>b,c,d,e</sup>), 3.53 – 3.49 (m, 1H, H-5<sup>f</sup>), 3.45 (dt,  $J = 9.7, 6.6$  Hz, 1H, octyl OCH<sub>2</sub>), 1.68 (t,  $J = 4.4$  Hz, 1H, -OH), 1.63 – 1.58 (m, 2H, octyl CH<sub>2</sub>), 1.35 – 1.25 (m, 10H octyl CH<sub>2</sub>), 0.87 (t,  $J = 7.0$  Hz, 3H octyl OCH<sub>3</sub>); <sup>13</sup>C NMR (150 MHz, CDCl<sub>3</sub>)  $\delta$  165.67 (C=O), 165.42 (C=O), 165.39 (C=O), 165.37 ( $\times 2$ , C=O), 165.30 (C=O), 138.03 (Ar), 137.99 (Ar), 137.96 (Ar), 137.70 (Ar), 133.57 (Ar), 133.45 (Ar), 133.41 (Ar), 133.38 (Ar), 129.93 (Ar), 129.91 (Ar), 129.83 (Ar), 129.72 (Ar), 129.68 (Ar), 129.65 (Ar), 129.64 (Ar), 129.62 (Ar), 129.54 (Ar), 128.63 (Ar), 128.60 (Ar), 128.45 (Ar), 128.39 (Ar), 128.37 (Ar), 127.99 (Ar), 127.87 (Ar), 127.84 (Ar), 127.82 (Ar), 127.76 (Ar), 127.66 (Ar), 106.38 (C-1<sup>f</sup>), 106.30 (C-1), 106.27 ( $\times 2$ , C-1), 106.25 (C-1), 106.08 (C-1<sup>a</sup>), 83.46, 83.44, 83.35, 83.31, 83.28, 82.89 (C-3<sup>f</sup>), 82.35 (C-2<sup>a</sup>), 82.16, 81.97, 81.92, 81.90, 81.87, 81.61 (C-4<sup>a</sup>), 72.47 (PhCH<sub>2</sub>), 72.26 ( $\times 2$ , PhCH<sub>2</sub>), 72.19 ( $\times 2$ , PhCH<sub>2</sub>), 72.17 (PhCH<sub>2</sub>), 67.73 (octyl OCH<sub>2</sub>), 65.72 (C-5<sup>a</sup>), 65.65 (C-5), 65.60 (C-5), 65.54 ( $\times 2$ , C-5), 62.03 (C-5<sup>f</sup>), 31.97 (octyl CH<sub>2</sub>), 29.58 (octyl CH<sub>2</sub>), 29.53 (octyl OCH<sub>2</sub>CH<sub>2</sub>), 29.39 (octyl CH<sub>2</sub>), 26.20 (octyl

CH<sub>2</sub>), 22.79 (octyl CH<sub>2</sub>), 14.24 (octyl CH<sub>3</sub>); HRMS (ESI) Calcd for C<sub>122</sub>H<sub>130</sub>O<sub>31</sub>N [M + NH<sub>4</sub>]<sup>+</sup>: 2104.8621, found: 2104.8641.

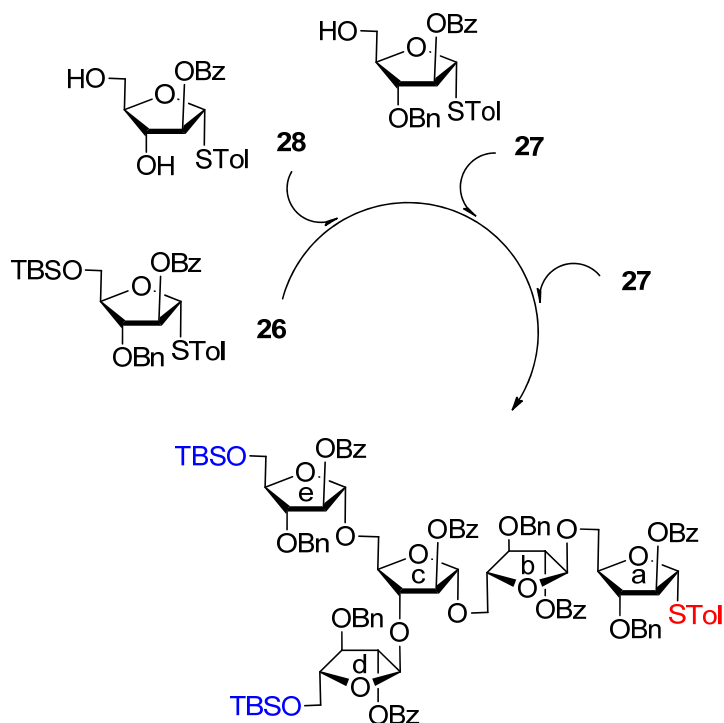

*p*-Tolyl 2-*O*-benzoyl-3-*O*-benzyl-5-*O*-*tert*-butydimethylsilyl- $\alpha$ -D-arabinofuranosyl<sup>e</sup>-(1→5)-(2-*O*-benzoyl-3-*O*-benzyl-5-*O*-*tert*-butydimethylsilyl- $\alpha$ -D-arabinofuranosyl<sup>d</sup>)-(1→3)-2-*O*-benzoyl- $\alpha$ -D-arabinofuranosyl<sup>c</sup>-(1→5)-2-*O*-benzoyl-3-*O*-benzyl- $\alpha$ -D-arabinofuranosyl<sup>b</sup>-(1→5)-2-*O*-benzoyl-3-*O*-benzyl-1-thio- $\alpha$ -D-arabinofuranoside<sup>a</sup> (**16**): A mixture of **26** (1.15 g, 2.039 mmol), TTBP (1.17 g, 4.72 mmol) and freshly activated 4 Å molecular sieves (7.0 g) in anhydrous CH<sub>2</sub>Cl<sub>2</sub> (40 mL) under argon atmosphere was stirred for 20 min at room temperature, and cooled to -78 °C. 5 min later, stoichiometric *p*-TolSCl (281.3 μL, 2.039 mmol) was added, followed by dropwise addition of AgOTf (10.2 mL, 4.078 mmol, 0.4 mol/L in anhydrous toluene/CH<sub>2</sub>Cl<sub>2</sub>, 3:1). After another 5 min, a solution of **28** (350.0 mg, 0.971 mmol) in anhydrous CH<sub>2</sub>Cl<sub>2</sub> (4 mL) was slowly added. The resulting mixture was slowly warmed to room temperature within 2 h and cooled back to -78 °C. 5 min later, stoichiometric *p*-TolSCl (134.0 μL, 0.971 mmol) was added, followed by dropwise addition of AgOTf (4.9 mL, 1.942 mmol, 0.4 mol/L in anhydrous toluene/CH<sub>2</sub>Cl<sub>2</sub>, 3:1). After another 5 min, a solution of **27** (415.6 mg, 0.922 mmol) in

anhydrous CH<sub>2</sub>Cl<sub>2</sub> (4 mL) was slowly added. The resulting mixture was stirred at -78 °C for 10 min, warmed to room temperature, and cooled back to -78 °C. 5 min later, stoichiometric *p*-TolSCl (127.2 μL, 0.922 mmol) was added, followed by dropwise addition of AgOTf (4.6 mL, 1.844 mmol, 0.4 mol/L in anhydrous toluene/CH<sub>2</sub>Cl<sub>2</sub>, 3:1). After another 5 min, a solution of **27** (481.2 mg, 1.068 mmol) in anhydrous CH<sub>2</sub>Cl<sub>2</sub> (4 mL) was slowly added. The resulting mixture was stirred at -78 °C for 10 min, warmed to room temperature, and quenched with Et<sub>3</sub>N (1 mL) and filtered through Celite. After removal of the solvent, the desired product was purified by column chromatography on silica gel (petroleum ether/acetone, 7:1) to afford **16** (1.36 g, 78%) as white foam. *R*<sub>f</sub> = 0.48 (petroleum ether/ethyl acetate, 3:1); [α]<sub>D</sub><sup>30</sup> +78.2 (*c* 0.4, CH<sub>2</sub>Cl<sub>2</sub>); <sup>1</sup>H NMR (600 MHz, CDCl<sub>3</sub>) δ 8.04 – 8.02 (m, 2H, Ar), 8.01 – 7.99 (m, 6H, Ar), 7.97 – 7.96 (m, 2H, Ar), 7.56 (td, *J* = 7.6, 1.1 Hz, 2H, Ar), 7.53 – 7.48 (m, 2H, Ar), 7.43 – 7.939 (m, 9H, Ar), 7.37 – 7.33 (m, 6H, Ar), 7.28 – 7.18 (m, 15H, Ar), 7.16 – 7.12 (m, 3H, Ar), 7.06 (d, *J* = 8.0 Hz, 2H, Ar), 5.61 (s, 1H, H-1<sup>a</sup>), 5.57 (t, *J* = 1.9 Hz, 1H, H-2<sup>a</sup>), 5.44 (s, 1H, H-1<sup>d</sup>), 5.42 (d, *J* = 1.4 Hz, 1H, H-2<sup>b</sup>), 5.41 (d, *J* = 1.1 Hz, 1H, H-2<sup>e</sup>), 5.38 (d, *J* = 1.6 Hz, 1H, H-2<sup>c</sup>), 5.34 (d, *J* = 1.2 Hz, 1H, H-2<sup>d</sup>), 5.27 (s, 1H, H-1<sup>e</sup>), 5.26 (s, 1H, H-1<sup>c</sup>), 5.21 (s, 1H, H-1<sup>b</sup>), 4.76 (d, *J* = 12.0 Hz, 1H, PhCH<sub>2</sub>), 4.70 (d, *J* = 12.1 Hz, 1H, PhCH<sub>2</sub>), 4.63 – 4.59 (m, 3H, PhCH<sub>2</sub>), 4.56 (dd, *J* = 9.1, 4.0 Hz, 1H, H-4<sup>a</sup>), 4.54 – 4.47 (m, 3H, PhCH<sub>2</sub>), 4.45 (dd, *J* = 6.1, 1.1 Hz, 1H, H-3<sup>c</sup>), 4.27 (dd, *J* = 5.5, 1.3 Hz, 1H, H-3<sup>a</sup>), 4.22 – 4.18 (m, 3H, H-4<sup>b,c,e</sup>), 4.16 – 4.15 (m, 1H, H-3<sup>b</sup>), 4.13 (dd, *J* = 9.3, 4.4 Hz, 1H, H-4<sup>d</sup>), 4.00 (d, *J* = 5.1 Hz, 2H, H-3<sup>d,e</sup>), 3.97 – 3.94 (m, 2H, H-5<sup>a,c</sup>), 3.84 (dd, *J* = 11.4, 4.1 Hz, 1H, H-5<sup>b</sup>), 3.78 – 3.65 (m, 7H, H-5<sup>a,b,c,d,e</sup>), 2.27 (s, 3H, tolyl CH<sub>3</sub>), 0.79 (s, 9H, *t*-Bu), 0.76 (s, 9H, *t*-Bu), -0.02 (s, 3H, CH<sub>3</sub>), -0.05 (s, 3H, CH<sub>3</sub>), -0.07 (s, 3H, CH<sub>3</sub>), -0.09 (s, 3H, CH<sub>3</sub>); <sup>13</sup>C NMR (150 MHz, CDCl<sub>3</sub>) δ 165.58 (C=O), 165.49 (C=O), 165.47 (C=O), 165.34 (C=O), 165.23 (C=O), 138.02 (Ar), 137.99 (Ar), 137.96 (Ar), 137.78 (Ar), 137.60 (Ar), 133.47 (Ar), 133.39 (Ar), 133.33 (Ar), 133.32 (Ar), 133.28 (Ar), 132.56 (Ar), 130.73 (Ar), 130.01 (Ar), 129.99 (Ar), 129.95 (Ar), 129.91 (Ar), 129.82 (Ar), 129.78 (Ar), 129.75 (Ar), 129.67 (Ar), 129.58 (Ar), 129.53 (Ar), 128.63 (Ar), 128.58 (Ar), 128.53 (Ar), 128.52 (Ar), 128.44 (Ar), 128.39 (Ar), 128.37 (Ar), 128.02 (Ar), 127.97 (Ar), 127.87 (Ar), 127.83

(Ar), 127.70 (Ar), 127.69 (Ar), 127.61 (Ar), 106.40 (C-1<sup>e</sup>), 106.31 (C-1<sup>b</sup>), 106.18 (C-1<sup>c</sup>), 105.51 (C-1<sup>d</sup>), 91.49 (C-1<sup>a</sup>), 84.12 (C-4<sup>d</sup>), 83.86, 83.32 (C-3<sup>b</sup>), 83.15 (C-3), 83.13 (C-3), 82.88 (C-3), 82.67 (C-2<sup>c</sup>), 82.46 (C-2<sup>a</sup>), 82.22, 82.21, 82.08, 81.99, 81.78 (C-4<sup>a</sup>), 80.06 (C-3<sup>c</sup>), 72.55 (PhCH<sub>2</sub>), 72.47 (PhCH<sub>2</sub>), 72.16 (PhCH<sub>2</sub>), 71.92 (PhCH<sub>2</sub>), 65.61 (C-5<sup>b</sup>), 65.57 (C-5<sup>a</sup>), 65.28 (C-5<sup>c</sup>), 62.38 (C-5), 62.37 (C-5), 25.97 (*t*-Bu), 25.95 (*t*-Bu), 21.22 (tolyl CH<sub>3</sub>), 18.42 (*t*-Bu), 18.37 (*t*-Bu), -5.22 (CH<sub>3</sub>), -5.28 (CH<sub>3</sub>), -5.33 (CH<sub>3</sub>), -5.38 (CH<sub>3</sub>); HRMS (ESI) Calcd for C<sub>107</sub>H<sub>120</sub>O<sub>25</sub>SSi<sub>2</sub>Na [M + Na]<sup>+</sup>: 1915.7270, found: 1915.7243.

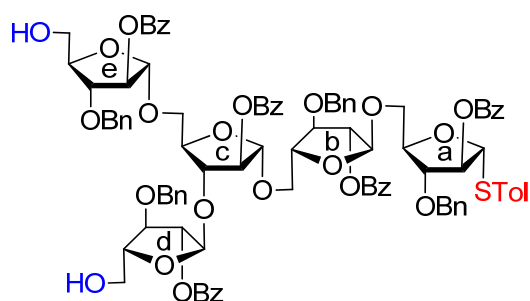

***p*-Tolyl 2-*O*-benzoyl-3-*O*-benzyl- $\alpha$ -D-arabinofuranosyl<sup>e</sup>-(1 $\rightarrow$ 5)-(2-*O*-benzoyl-3-*O*-benzyl- $\alpha$ -D-arabinofuranosyl<sup>d</sup>)-(1 $\rightarrow$ 3)-2-*O*-benzoyl- $\alpha$ -D-arabinofuranosyl<sup>c</sup>-(1 $\rightarrow$ 5)-2-*O*-benzoyl-3-*O*-benzyl- $\alpha$ -D-arabinofuranosyl<sup>b</sup>-(1 $\rightarrow$ 5)-2-*O*-benzoyl-3-*O*-benzyl-1-thio- $\alpha$ -D-arabinofuranoside<sup>a</sup> (11):** To solution of **16** (2.17 g, 1.146 mmol) in THF (20 mL) was added AcOH (262  $\mu$ L, 4.58 mmol) and TBAF (4.6 mL, 4.6 mmol, 1.0 M in THF), the resulting mixture was stirred at 35 °C for 24 h, and the solvent was evaporated *in vacuo* to give a residue, which was dissolved in EtOAc (100 mL). After being washed with a saturated aqueous NaHCO<sub>3</sub> solution (50 mL) and brine (50 mL), the organic layer was dried over Na<sub>2</sub>SO<sub>4</sub>, filtered, and concentrated. The residue was purified by column chromatography on silica gel (petroleum ether/acetone, 3:1) to afford **11** (1.82 g, 95%) as white foam.  $R_f$  = 0.28 (petroleum ether/ethyl acetate, 1:1);  $[\alpha]_D^{30}$  +100.1 (*c* 0.6, CH<sub>2</sub>Cl<sub>2</sub>); <sup>1</sup>H NMR (600 MHz, CDCl<sub>3</sub>)  $\delta$  8.04 – 7.97 (m, 10H, Ar), 7.59 – 7.56 (m, 2H, Ar), 7.53 (t,  $J$  = 7.4 Hz, 1H, Ar), 7.49 (t,  $J$  = 7.4 Hz, 1H, Ar), 7.45 – 7.39 (m, 9H, Ar), 7.35 (t,  $J$  = 7.5 Hz, 1H, Ar), 7.29 – 7.14 (m, 18H, Ar), 7.06 (d,  $J$  = 8.0 Hz, 2H, Ar), 5.61 (s, 1H, H-1<sup>a</sup>), 5.57 (s, 1H, H-2<sup>a</sup>), 5.51 (s, 1H, H-1<sup>d</sup>), 5.42 (d,

$J = 0.7$  Hz, 1H, H-2<sup>b</sup>), 5.40 (d,  $J = 0.7$  Hz, 1H, H-2<sup>c</sup>), 5.37 (d,  $J = 1.3$  Hz, 1H, H-2<sup>c</sup>), 5.35 (d,  $J = 1.3$  Hz, 1H, H-2<sup>d</sup>), 5.30 (s, 1H, H-1<sup>c</sup>), 5.25 (s, 1H, H-1<sup>e</sup>), 5.23 (s, 1H, H-1<sup>b</sup>), 4.78 (d,  $J = 12.1$  Hz, 1H, PhCH<sub>2</sub>), 4.72 (d,  $J = 12.0$  Hz, 1H, PhCH<sub>2</sub>), 4.65 – 4.62 (m, 2H, PhCH<sub>2</sub>), 4.57 (dd,  $J = 9.1, 4.1$  Hz, 1H, H-4<sup>a</sup>), 4.53 – 4.48 (m, 4H, PhCH<sub>2</sub>, H-3<sup>c</sup>), 4.36 (d,  $J = 12.2$  Hz, 1H, PhCH<sub>2</sub>), 4.27 (d,  $J = 5.3$  Hz, 1H, H-3<sup>a</sup>), 4.26 – 4.24 (m, 1H, H-4<sup>d</sup>/H-4<sup>e</sup>), 4.22 (dd,  $J = 9.1, 4.1$  Hz, 1H, H-4<sup>b</sup>), 4.19 – 4.16 (m, 2H, H-4<sup>c</sup>, H-4<sup>d</sup>/H-4<sup>e</sup>), 4.13 (d,  $J = 5.2$  Hz, 1H, H-3<sup>b</sup>), 3.97 – 3.93 (m, 2H, H-5<sup>a,c</sup>), 3.84 (dd,  $J = 11.4, 4.2$  Hz, 1H, H-5<sup>b</sup>), 3.81 – 3.79 (m, 3H, H-3<sup>d,e</sup>, H-5<sup>c</sup>), 3.75 (dd,  $J = 11.3, 4.0$  Hz, 1H, H-5<sup>a</sup>), 3.71 – 3.67 (m, 3H, H-5<sup>b,d,e</sup>), 3.59 – 3.52 (m, 2H, H-5<sup>d,e</sup>), 2.57 (t,  $J = 6.5$  Hz, 1H, -OH), 2.27 (s, 3H, tolyl CH<sub>3</sub>), 2.21 (t,  $J = 6.3$  Hz, 1H, -OH); <sup>13</sup>C NMR (150 MHz, CDCl<sub>3</sub>)  $\delta$  165.62 (C=O), 165.57 (C=O), 165.43 (C=O), 165.33 (C=O), 165.17 (C=O), 137.93 (Ar), 137.79 (Ar), 137.63 (Ar), 137.62 (Ar), 137.56 (Ar), 133.61 (Ar), 133.48 (Ar), 133.39 (Ar), 132.57 (Ar), 130.71 (Ar), 130.00 (Ar), 129.98 (Ar), 129.96 (Ar), 129.89 (Ar), 129.86 (Ar), 129.82 (Ar), 129.60 (Ar), 129.57 (Ar), 129.52 (Ar), 129.49 (Ar), 128.65 (Ar), 128.64 (Ar), 128.60 (Ar), 128.57 (Ar), 128.54 (Ar), 128.50 (Ar), 128.44 (Ar), 128.42 (Ar), 128.03 (Ar), 127.95 (Ar), 127.92 (Ar), 127.86 (Ar), 127.73 (Ar), 106.33 (C-1<sup>b</sup>), 106.13 ( $\times 2$ , C-1<sup>c,e</sup>), 105.60 (H-1<sup>d</sup>), 91.52 (H-1<sup>a</sup>), 83.80, 83.55, 83.49, 83.34, 83.33, 83.18, 82.89 (C-2<sup>c</sup>), 82.44 (C-2<sup>a</sup>), 82.07, 82.05, 81.90 (C-2<sup>b</sup>), 81.77 ( $\times 2$ , C-2<sup>e</sup>, C-4<sup>a</sup>), 81.47, 79.92 (C-3<sup>c</sup>), 72.56 (PhCH<sub>2</sub>), 72.43 (PhCH<sub>2</sub>), 72.39 (PhCH<sub>2</sub>), 72.13 (PhCH<sub>2</sub>), 65.76 (C-5<sup>b</sup>), 65.59 (C-5<sup>a</sup>), 64.78 (C-5<sup>c</sup>), 62.85 (C-5), 62.75 (C-5), 21.22 (tolyl CH<sub>3</sub>); HRMS (ESI) Calcd for C<sub>95</sub>H<sub>92</sub>O<sub>25</sub>SNa [M + Na]<sup>+</sup>: 1687.5541, found: 1687.5589.

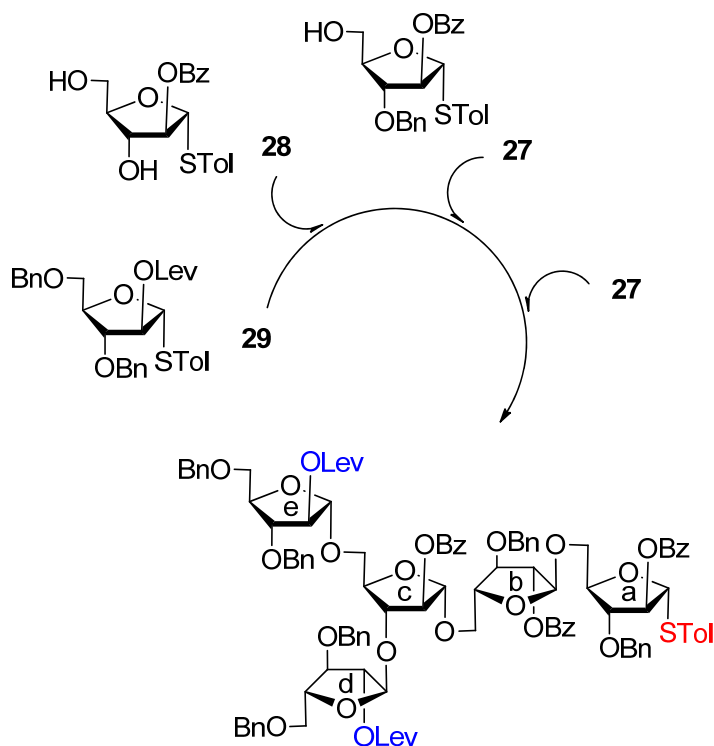

*p*-Tolyl 2-*O*-levulinoyl-3,5-di-*O*-benzyl- $\alpha$ -D-arabinofuranosyl<sup>e</sup>-(1 $\rightarrow$ 5)-(2-*O*-levulinoyl-3,5-di-*O*-benzyl- $\alpha$ -D-arabinofuranosyl<sup>d</sup>)-(1 $\rightarrow$ 3)-2-*O*-benzoyl- $\alpha$ -D-arabinofuranosyl<sup>c</sup>-(1 $\rightarrow$ 5)-2-*O*-benzoyl-3-*O*-benzyl- $\alpha$ -D-arabinofuranosyl<sup>b</sup>-(1 $\rightarrow$ 5)-2-*O*-benzoyl-3-*O*-benzyl-1-thio- $\alpha$ -D-arabinofuranoside<sup>a</sup> (**15**): A mixture of **29** (1.09 g, 2.039 mmol), TTBP (1.17 g, 4.72 mmol) and freshly activated 4 Å molecular sieves (7.0 g) in anhydrous CH<sub>2</sub>Cl<sub>2</sub> (40 mL) under argon atmosphere was stirred for 20 min at room temperature, and cooled to -78 °C. 5 min later, stoichiometric *p*-TolSCl (281.3 μL, 2.039 mmol) was added, followed by dropwise addition of AgOTf (10.2 mL, 4.078 mmol, 0.4 mol/L in anhydrous toluene/CH<sub>2</sub>Cl<sub>2</sub>, 3:1). After another 5 min, a solution of **28** (350.0 mg, 0.971 mmol) in anhydrous CH<sub>2</sub>Cl<sub>2</sub> (4 mL) was slowly added. The resulting mixture was slowly warmed to room temperature within 2 h and cooled back to -78 °C. 5 min later, stoichiometric *p*-TolSCl (134.0 μL, 0.971 mmol) was added, followed by dropwise addition of AgOTf (4.9 mL, 1.942 mmol, 0.4 mol/L in anhydrous toluene/CH<sub>2</sub>Cl<sub>2</sub>, 3:1). After another 5 min, a solution of **27** (415.6 mg, 0.922 mmol) in anhydrous CH<sub>2</sub>Cl<sub>2</sub> (4 mL) was slowly added. The resulting mixture was stirred at -78 °C for 10 min, warmed to room temperature, and cooled back to -78 °C. 5 min later, stoichiometric *p*-TolSCl (127.2 μL, 0.922 mmol) was added, followed by dropwise addition of AgOTf (4.6 mL, 1.844 mmol, 0.4 mol/L in

anhydrous toluene/CH<sub>2</sub>Cl<sub>2</sub>, 3:1). After another 5 min, a solution of **27** (481.2 mg, 1.068 mmol) in anhydrous CH<sub>2</sub>Cl<sub>2</sub> (4 mL) was slowly added. The resulting mixture was stirred at -78 °C for 10 min, warmed to room temperature, and quenched with Et<sub>3</sub>N (1 mL) and filtered through Celite. After removal of the solvent, the desired product was purified by column chromatography on silica gel (petroleum ether/acetone, 3.5:1) to afford **15** (1.29 g, 76%) as white foam. *R<sub>f</sub>* = 0.43 (petroleum ether/ethyl acetate, 1:1); [ $\alpha$ ]<sub>D</sub><sup>30</sup> +114.5 (*c* 0.3, CH<sub>2</sub>Cl<sub>2</sub>); <sup>1</sup>H NMR (600 MHz, CDCl<sub>3</sub>)  $\delta$  8.04 – 8.01 (m, 4H, Ar), 7.99 (d, *J* = 7.5 Hz, 2H, Ar), 7.54 – 7.50 (m, 3H, Ar), 7.43 – 7.33 (m, 10H, Ar), 7.29 – 7.13 (m, 28H, Ar), 7.06 (d, *J* = 7.9 Hz, 2H, Ar), 5.61 (s, 1H, H-1<sup>a</sup>), 5.57 (s, 1H, H-2<sup>a</sup>), 5.41 (s, 1H, H-2<sup>b</sup>), 5.33 (d, *J* = 1.2 Hz, 1H, H-2<sup>c</sup>), 5.31 (s, 1H, H-1<sup>d</sup>), 5.23 (s, 1H, H-1<sup>c</sup>), 5.21 (s, 1H, H-1<sup>b</sup>), 5.14 (s, 1H, H-2<sup>e</sup>), 5.12 (s, 1H, H-1<sup>e</sup>), 5.11 (s, 1H, H-2<sup>d</sup>), 4.76 (d, *J* = 11.9 Hz, 1H, PhCH<sub>2</sub>), 4.63 – 4.59 (m, 3H, PhCH<sub>2</sub>), 4.56 (dd, *J* = 8.9, 3.8 Hz, 1H, H-4<sup>a</sup>), 4.49 – 4.38 (m, 7H, PhCH<sub>2</sub>, H-3<sup>c</sup>), 4.36 – 4.32 (m, 2H, PhCH<sub>2</sub>), 4.27 (dd, *J* = 5.2, 1.0 Hz, 1H, H-3<sup>a</sup>), 4.24 (dd, *J* = 8.9, 4.7 Hz, 1H, H-4<sup>c</sup>), 4.20 – 4.14 (m, 3H, H-4<sup>b,c,d</sup>), 4.10 (d, *J* = 5.2 Hz, 1H, H-3<sup>b</sup>), 3.95 (dd, *J* = 11.4, 3.9 Hz, 1H, H-5<sup>a</sup>), 3.91 (dd, *J* = 11.6, 4.0 Hz, 1H, H-5<sup>c</sup>), 3.83 – 3.81 (m, 2H, H-3<sup>d</sup>, H-5<sup>b</sup>), 3.78 (d, *J* = 5.3 Hz, 1H, H-3<sup>e</sup>), 3.74 (dd, *J* = 11.4, 4.0 Hz, 1H, H-5<sup>a</sup>), 3.70 (dd, *J* = 11.4, 2.3 Hz, 1H, H-5<sup>c</sup>), 3.65 (dd, *J* = 11.4, 3.9 Hz, 1H, H-5<sup>b</sup>), 3.54 – 3.51 (m, 2H, H-5<sup>d,e</sup>), 3.47 – 3.43 (m, 2H, H-5<sup>d,e</sup>), 2.67 – 2.53 (m, 4H, Lev CH<sub>2</sub>), 2.46 – 2.35 (m, 4H, Lev CH<sub>2</sub>), 2.28 (s, 3H, tolyl CH<sub>3</sub>), 2.11 (s, 3H, Lev CH<sub>3</sub>), 2.10 (s, 3H, Lev CH<sub>3</sub>); <sup>13</sup>C NMR (150 MHz, CDCl<sub>3</sub>)  $\delta$  206.26 (Lev C=O), 206.21 (Lev C=O), 171.53 (Lev C=O), 171.50 (Lev C=O), 165.57 (C=O), 165.49 (C=O), 165.43 (C=O), 138.27 (Ar), 138.20 (Ar), 137.99 (Ar), 137.94 (Ar), 137.92 (Ar), 137.78 (Ar), 137.62 (Ar), 133.47 (Ar), 133.42 (Ar), 133.32 (Ar), 132.56 (Ar), 130.72 (Ar), 130.00 (Ar), 129.98 (Ar), 129.94 (Ar), 129.82 (Ar), 129.63 (Ar), 129.52 (Ar), 128.65 (Ar), 128.63 (Ar), 128.54 (Ar), 128.42 (Ar), 128.40 (Ar), 128.37 (Ar), 128.33 (Ar), 128.05 (Ar), 128.02 (Ar), 127.94 (Ar), 127.88 (Ar), 127.81 (Ar), 127.76 (Ar), 127.73 (Ar), 127.70 (Ar), 127.64 (Ar), 127.62 (Ar), 106.29 (C-1<sup>b</sup>), 106.14 (C-1<sup>c</sup>), 106.12 (C-1<sup>c</sup>), 105.37 (C-1<sup>d</sup>), 91.50 (C-1<sup>a</sup>), 83.41 (C-3<sup>b</sup>), 83.34 (C-3<sup>d</sup>), 83.22 (C-3<sup>e</sup>), 83.15 (C-3<sup>a</sup>), 82.79 (C-2<sup>c</sup>), 82.56 (C-4<sup>d</sup>), 82.45 (C-2<sup>a</sup>), 82.32 (C-4<sup>e</sup>), 82.03 (C-4<sup>b</sup>), 81.97 (C-2<sup>b</sup>), 81.77, 81.75 ( $\times 2$ ), 81.63 (C-2<sup>c</sup>),

80.05 (C-3<sup>c</sup>), 73.49 (PhCH<sub>2</sub>), 73.45 (PhCH<sub>2</sub>), 72.56 (PhCH<sub>2</sub>), 72.41 (PhCH<sub>2</sub>), 72.11 (PhCH<sub>2</sub>), 71.81 (PhCH<sub>2</sub>), 69.37 (C-5<sup>e</sup>), 69.15 (C-5<sup>d</sup>), 65.74 (C-5<sup>b</sup>), 65.56 (C-5<sup>a</sup>), 65.18 (C-5<sup>c</sup>), 37.91 (×2, Lev CH<sub>2</sub>), 29.88 (×2, Lev CH<sub>3</sub>), 28.02 (Lev CH<sub>2</sub>), 27.95 (Lev CH<sub>2</sub>), 21.22 (tolyl CH<sub>3</sub>); HRMS (ESI) Calcd for C<sub>105</sub>H<sub>108</sub>O<sub>27</sub>SNa [M + Na]<sup>+</sup>: 1855.6691, found: 1855.6703.

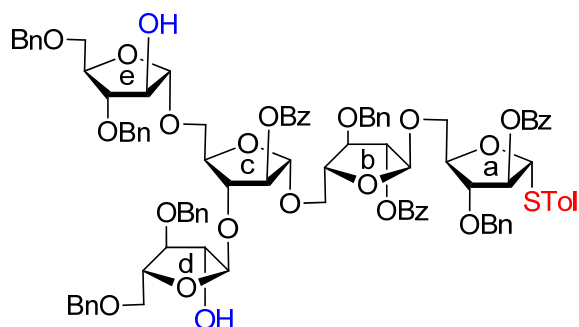

***p*-Tolyl 3,5-di-*O*-benzyl- $\alpha$ -D-arabinofuranosyl<sup>e</sup>-(1→5)-(3,5-di-*O*-benzyl- $\alpha$ -D-arabinofuranosyl<sup>d</sup>)-(1→5)-2-*O*-benzoyl- $\alpha$ -D-arabinofuranosyl<sup>c</sup>-(1→3)-2-*O*-benzoyl-3-*O*-benzyl- $\alpha$ -D-arabinofuranosyl<sup>b</sup>-(1→5)-2-*O*-benzoyl-3-*O*-benzyl-1-thio- $\alpha$ -D-arabinofuranoside<sup>a</sup> (14):** To a solution of **15** (1.0 g, 0.545 mmol) in THF (20 mL) and CH<sub>3</sub>OH (2 mL) was added hydrazine acetate (0.25 g, 2.725 mmol), the resulting mixture was stirred at room temperature for 5 h, quenched with acetone (1 mL) and stirred for another 10 min. After removal of the solvent, the residue was dissolved in EtOAc (50 mL), washed with a saturated aqueous NaHCO<sub>3</sub> solution (20 mL) and brine (20 mL), dried over Na<sub>2</sub>SO<sub>4</sub>, filtered, and concentrated. The desired product was purified by column chromatography on silica gel (petroleum ether/acetone, 3.5:1) to afford **14** (0.84 g, 94%) as white foam. *R*<sub>f</sub> = 0.55 (petroleum ether/ethyl acetate, 1:1); [ $\alpha$ ]<sub>D</sub><sup>30</sup> +116.8 (*c* 1.0, CH<sub>2</sub>Cl<sub>2</sub>); <sup>1</sup>H NMR (600 MHz, CDCl<sub>3</sub>)  $\delta$  8.04 – 8.02 (m, 4H, Ar), 7.97 (d, *J* = 7.3 Hz, 2H, Ar), 7.55 (t, *J* = 7.4 Hz, 1H, Ar), 7.52 (td, *J* = 7.4, 1.1 Hz, 2H, Ar), 7.45 – 7.33 (m, 10H, Ar), 7.31 – 7.13 (m, 28H, Ar), 7.06 (d, *J* = 8.0 Hz, 2H, Ar), 5.61 (s, 1H, H-1<sup>a</sup>), 5.57 (t, *J* = 1.5 Hz, 1H, H-2<sup>a</sup>), 5.40 (d, *J* = 1.7 Hz, 1H, H-2<sup>b</sup>), 5.30 (d, *J* = 1.7 Hz, 1H, H-2<sup>c</sup>), 5.23 (s, 1H, H-1<sup>c</sup>), 5.23 (s, 1H, H-1<sup>b</sup>), 5.15 (s, 1H, H-2<sup>d</sup>), 5.05 (s, 1H, H-1<sup>e</sup>), 4.77 (d, *J* = 12.0 Hz, 1H, PhCH<sub>2</sub>), 4.63 – 4.60 (m, 2H, PhCH<sub>2</sub>), 4.57 – 4.52 (m, 3H, H-4<sup>a</sup>, PhCH<sub>2</sub>), 4.49 (d, *J* = 12.8 Hz, 1H, PhCH<sub>2</sub>), 4.46 (d, *J* = 12.8



Hz, 1H, PhCH<sub>2</sub>), 4.43 – 4.35 (m, 5H, H-3<sup>c</sup>, PhCH<sub>2</sub>), 4.30 (d, *J* = 12.3 Hz, 1H, PhCH<sub>2</sub>), 4.25 (br s, 2H, H-4<sup>e</sup>, H-3<sup>a</sup>), 4.19 (dd, *J* = 9.1, 4.1 Hz, 1H, H-4<sup>b</sup>), 4.16 (dd, *J* = 6.5, 3.0 Hz, 1H, H-4<sup>d</sup>), 4.12 – 4.10 (m, 2H, H-2<sup>e</sup>, H-4<sup>c</sup>), 4.07 – 4.05 (m, 2H, H-3<sup>b</sup>, H-2<sup>d</sup>), 3.96 – 3.91 (m, 2H, H-5<sup>a,c</sup>), 3.82 (dd, *J* = 11.3, 4.3 Hz, 1H, H-5<sup>a</sup>), 3.78 (d, *J* = 2.8 Hz, 1H, H-3<sup>d</sup>), 3.76 (d, *J* = 2.8 Hz, 1H, H-3<sup>c</sup>), 3.74 (dd, *J* = 11.4, 4.0 Hz, 1H, H-5<sup>a</sup>), 3.68 (dd, *J* = 11.5, 2.8 Hz, 1H, H-5<sup>c</sup>), 3.63 (dd, *J* = 11.3, 3.8 Hz, 1H, H-5<sup>b</sup>), 3.53 (dd, *J* = 10.6, 2.3 Hz, 1H, H-5<sup>e</sup>), 3.49 (dd, *J* = 10.6, 2.5 Hz, 1H, H-5<sup>d</sup>), 3.39 (dd, *J* = 10.6, 3.1 Hz, 1H, H-5<sup>e</sup>), 3.36 (dd, *J* = 10.5, 2.6 Hz, 1H, H-5<sup>d</sup>), 3.22 (d, *J* = 9.9 Hz, 1H, -OH<sup>e</sup>), 3.00 (d, *J* = 8.9 Hz, 1H, -OH<sup>d</sup>), 2.27 (s, 3H, tolyl CH<sub>3</sub>); <sup>13</sup>C NMR (150 MHz, CDCl<sub>3</sub>) δ 165.53 (C=O), 165.51 (C=O), 165.46 (C=O), 137.94 (Ar), 137.83 (Ar), 137.75 (Ar), 137.63 (Ar), 137.36 (Ar), 137.26 (Ar), 133.52 (Ar), 133.47 (Ar), 133.36 (Ar), 132.55 (Ar), 130.67 (Ar), 129.97 (Ar), 129.94 (Ar), 129.81 (Ar), 129.58 (Ar), 129.48 (Ar), 128.70 (Ar), 128.64 (Ar), 128.61 (Ar), 128.52 (Ar), 128.49 (Ar), 128.47 (Ar), 128.42 (Ar), 128.40 (Ar), 128.10 (Ar), 128.03 (Ar), 128.00 (Ar), 127.90 (Ar), 127.88 (Ar), 127.87 (Ar), 127.80 (Ar), 127.73 (Ar), 127.70 (Ar), 127.67 (Ar), 108.95 (C-1<sup>e</sup>), 108.21 (C-1<sup>d</sup>), 106.27 (C-1<sup>b</sup>), 106.06 (C-1<sup>c</sup>), 91.51 (C-1<sup>a</sup>), 85.16 (C-3<sup>d</sup>), 84.88 (C-3<sup>e</sup>), 83.42 (C-3<sup>b</sup>), 83.21 (C-2<sup>c</sup>), 83.15, 83.12, 83.11, 82.41 (C-2<sup>a</sup>), 82.08 (C-4<sup>b</sup>), 81.90 (C-2<sup>b</sup>), 81.82 (C-4<sup>c</sup>), 81.73 (C-4<sup>a</sup>), 80.71 (C-3<sup>c</sup>), 78.59 (C-2<sup>d</sup>), 78.29 (C-2<sup>e</sup>), 73.78 (PhCH<sub>2</sub>), 73.71 (PhCH<sub>2</sub>), 72.53 (PhCH<sub>2</sub>), 72.34 (PhCH<sub>2</sub>), 71.91 (PhCH<sub>2</sub>), 71.76 (PhCH<sub>2</sub>), 69.794 (C-5<sup>d</sup>/C-5<sup>e</sup>), 69.786 (C-5<sup>d</sup>/C-5<sup>e</sup>), 65.73 (C-5<sup>b</sup>), 65.51 (C-5<sup>a</sup>), 64.98 (C-5<sup>c</sup>), 21.20 (tolyl CH<sub>3</sub>); HRMS (ESI) Calcd for C<sub>95</sub>H<sub>96</sub>O<sub>23</sub>SNa [M + Na]<sup>+</sup>: 1659.5955, found: 1659.5988.

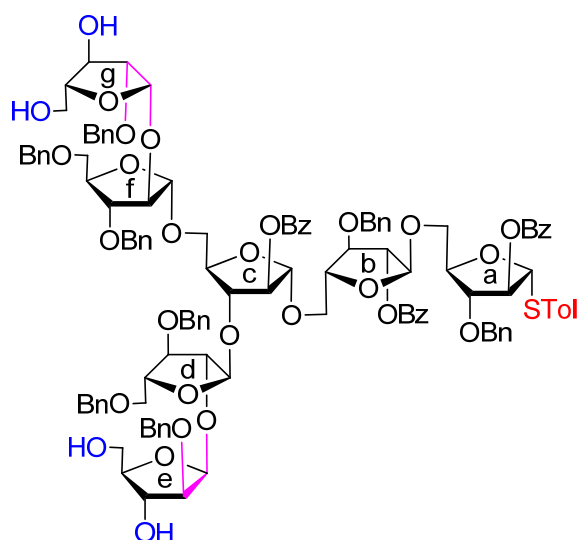

*p*-Tolyl            2-*O*-benzyl- $\beta$ -D-arabinofuranosyl<sup>g</sup>-(1→2)-3,5-di-*O*-benzyl- $\alpha$ -D-arabinofuranosyl<sup>f</sup>-(1→5)-[2-*O*-benzyl- $\beta$ -D-arabinofuranosyl<sup>e</sup>-(1→2)-3,5-di-*O*-benzyl- $\alpha$ -D-arabinofuranosyl<sup>d</sup>]- (1→3)-2-*O*-benzoyl- $\alpha$ -D-arabinofuranosyl<sup>c</sup>-(1→5)-2-*O*-benzoyl-3-*O*-benzyl- $\alpha$ -D-arabinofuranosyl<sup>b</sup>-(1→5)-2-*O*-benzoyl-3-*O*-benzyl-1-*t*hio- $\alpha$ -D-arabinofuranoside<sup>a</sup> (**31**): A mixture of **13b** (36 mg, 61.1  $\mu$ mol) and freshly activated 4 Å molecular sieves (1.0 g) in anhydrous CH<sub>2</sub>Cl<sub>2</sub> (8.5 mL) under argon atmosphere was stirred for 20 min at room temperature, and cooled to -78 °C. 5 min later, stoichiometric *p*-TolSCl (8.4  $\mu$ L, 61.1  $\mu$ mol) was added, followed by dropwise addition of AgOTf (305  $\mu$ L, 122.2  $\mu$ mol, 0.4 mol/L in anhydrous toluene/CH<sub>2</sub>Cl<sub>2</sub>, 3:1). After another 5 min, **14** (25 mg, 15.26  $\mu$ mol) was added. The reaction mixture was stirred at -78 °C for 10 min, quenched with Et<sub>3</sub>N (100  $\mu$ L), warmed to room temperature, and filtered through Celite. After removal of the solvent, the residue was purified by column chromatography on silica gel (petroleum ether/ethyl acetate, 7:1) to give **30b** ( $\beta,\beta$ -isomer:other isomers = 9:1), which was dissolved in THF (3 mL), followed by the addition of TBAF (0.15 mL, 0.15 mmol, 1 M in THF). The reaction solution was stirred at room temperature for 2 h, and concentrated *in vacuo*. The residue was purified by column chromatography on silica gel (toluene/acetonitrile, 4:1) to afford **31** (23.5 mg, 74% for two steps) as white foam.  $R_f$  = 0.18 (petroleum ether/acetone, 1.5:1);  $[\alpha]_D^{30}$  +47.7 (*c* 0.3, CH<sub>2</sub>Cl<sub>2</sub>); <sup>1</sup>H NMR (600 MHz, CDCl<sub>3</sub>)  $\delta$  8.02 – 8.01 (m, 2H, Ar), 7.98 – 7.97 (m, 2H, Ar), 7.92 – 7.90 (m, 2H, Ar), 7.52 (t, *J* = 7.4 Hz, 1H, Ar), 7.50 – 7.46 (m, 2H, Ar), 7.42 – 7.36 (m, 6H, Ar), 7.34 – 7.18 (m, 39H,

Ar), 7.15 – 7.10 (m, 3H, Ar), 7.06 (d,  $J = 8.0$  Hz, 2H, Ar), 5.60 (s, 1H, H-1<sup>a</sup>), 5.56 (t,  $J = 1.9$  Hz, 1H, H-2<sup>a</sup>), 5.38 (d,  $J = 1.4$  Hz, 1H, H-2<sup>b</sup>), 5.33 (d,  $J = 1.2$  Hz, 1H, H-1<sup>d</sup>), 5.30 (d,  $J = 1.8$  Hz, 1H, H-2<sup>c</sup>), 5.26 (s, 1H, H-1<sup>c</sup>), 5.20 – 5.19 (m, 2H, H-1<sup>b,e</sup>), 5.07 (d,  $J = 1.4$  Hz, 1H, H-1<sup>f</sup>), 5.03 (d,  $J = 4.4$  Hz, 1H, H-1<sup>g</sup>), 4.76 (d,  $J = 11.9$  Hz, 1H, PhCH<sub>2</sub>), 4.67 (d,  $J = 11.7$  Hz, 1H, PhCH<sub>2</sub>), 4.62 – 4.53 (m, 5H, PhCH<sub>2</sub>, H-4<sup>a</sup>), 4.49 – 4.37 (m, 9H, PhCH<sub>2</sub>), 4.35 – 4.29 (m, 5H, PhCH<sub>2</sub>, H-3<sup>c,e,g</sup>, H-2<sup>d</sup>), 4.26 (dd,  $J = 3.7, 1.7$  Hz, 1H, H-2<sup>f</sup>), 4.25 (dd,  $J = 5.4, 1.3$  Hz, 1H, H-3<sup>a</sup>), 4.22 – 4.17 (m, 3H, H-4<sup>b,c,f</sup>), 4.12 – 4.10 (m, 1H, H-4<sup>d</sup>), 4.07 (dd,  $J = 6.7, 3.8$  Hz, 1H, H-3<sup>d</sup>), 4.03 (dd,  $J = 6.2, 4.1$  Hz, 2H, H-3<sup>b,f</sup>), 3.97 (dd,  $J = 11.7, 3.9$  Hz, 1H, H-5<sup>c</sup>), 3.92 (dd,  $J = 11.3, 4.0$  Hz, 1H, H-5<sup>a</sup>), 3.85 – 3.70 (m, 7H, H-2<sup>e,g</sup>, H-4<sup>e,g</sup>, H-5<sup>a,c,f</sup>), 3.65 (dd,  $J = 11.4, 4.1$  Hz, 1H, H-5<sup>f</sup>), 3.61 (dt,  $J = 12.4, 4.1$  Hz, 1H, H-5<sup>e</sup>), 3.56 – 3.43 (m, 7H, H-5<sup>b,d,e,g</sup>), 2.27 (s, 3H, tolyl CH<sub>3</sub>), 2.26 – 2.24 (m, 1H, -OH), 2.16 – 2.15 (m, 1H, -OH), 2.09 (d,  $J = 4.2$  Hz, 1H, -OH), 2.08 (d,  $J = 4.2$  Hz, 1H, -OH); <sup>13</sup>C NMR (150 MHz, CDCl<sub>3</sub>)  $\delta$  165.75 (C=O), 165.55 (C=O), 165.39 (C=O), 138.11 (Ar), 138.09 (Ar), 137.95 (Ar), 137.90 (Ar), 137.88 (Ar), 137.80 (Ar), 137.77 (Ar), 137.73 (Ar), 137.68 (Ar), 133.50 (Ar), 133.48 (Ar), 132.59 (Ar), 130.67 (Ar), 130.00 (Ar), 129.91 (Ar), 129.89 (Ar), 129.84 (Ar), 129.57 (Ar), 129.50 (Ar), 129.46 (Ar), 128.71 (Ar), 128.63 (Ar), 128.59 (Ar), 128.54 (Ar), 128.49 (Ar), 128.48 (Ar), 128.44 (Ar), 128.38 (Ar), 128.21 (Ar), 128.11 (Ar), 128.06 (Ar), 128.03 (Ar), 127.96 (Ar), 127.88 (Ar), 127.84 (Ar), 127.80 (Ar), 127.77 (Ar), 127.72 (Ar), 106.38 (C-1<sup>f</sup>), 106.34 (C-1<sup>b</sup>), 106.06 (C-1<sup>c</sup>), 105.82 (C-1<sup>d</sup>), 99.58 (C-1<sup>g</sup>), 99.12 (C-1<sup>e</sup>), 91.53 (C-1<sup>a</sup>), 85.98 (C-2<sup>f</sup>), 85.43 (C-2<sup>d</sup>), 84.30, 84.27, 83.92, 83.66, 83.33, 83.17, 82.83, 82.40 (C-2<sup>a</sup>), 82.08, 82.06, 81.98, 81.93, 81.89, 81.75 (C-4<sup>a</sup>), 81.38, 81.08, 81.03, 73.51 (PhCH<sub>2</sub>), 73.48 (PhCH<sub>2</sub>), 73.45 (PhCH<sub>2</sub>), 72.61 (PhCH<sub>2</sub>), 72.56 (PhCH<sub>2</sub>), 72.38 (PhCH<sub>2</sub>), 72.34 (PhCH<sub>2</sub>), 71.95 (PhCH<sub>2</sub>), 69.62 (C-5), 69.45 (C-5), 66.00 (C-5), 65.61 (C-5), 65.41 (C-5), 62.94 (C-5), 62.79 (C-5), 21.23 (tolyl CH<sub>3</sub>); HRMS (ESI) Calcd for C<sub>119</sub>H<sub>124</sub>O<sub>31</sub>SNa [M + Na]<sup>+</sup>: 2103.7740, found: 2103.7800.

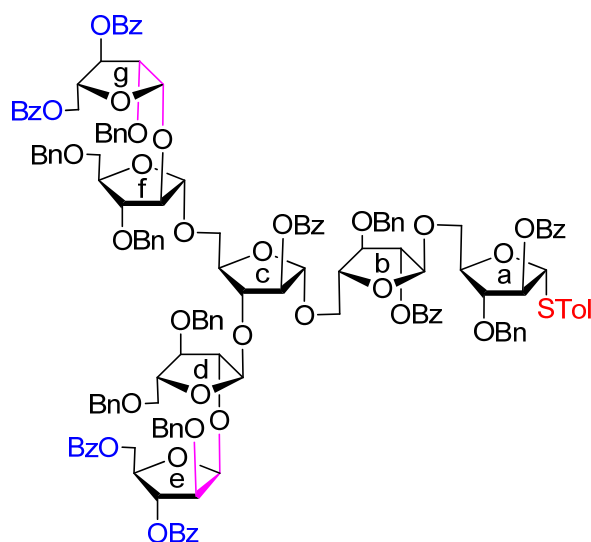

*p*-Tolyl 2-*O*-benzyl-3,5-di-*O*-benzoyl- $\beta$ -D-arabinofuranosyl<sup>g</sup>-(1→2)-3,5-di-*O*-benzyl- $\alpha$ -D-arabinofuranosyl<sup>f</sup>-(1→5)-[2-*O*-benzyl-3,5-di-*O*-benzoyl- $\beta$ -D-arabinofuranosyl<sup>e</sup>-(1→2)-3,5-di-*O*-benzyl- $\alpha$ -D-arabinofuranosyl<sup>d</sup>]- (1→3)-2-*O*-benzoyl- $\alpha$ -D-arabinofuranosyl<sup>c</sup>-(1→5)-2-*O*-benzoyl-3-*O*-benzyl- $\alpha$ -D-arabinofuranosyl<sup>b</sup>-(1→5)-2-*O*-benzoyl-3-*O*-benzyl-1-thio- $\alpha$ -D-arabinofuranoside<sup>a</sup> (**10**): To a solution of **31** (500 mg, 0.24 mmol) in anhydrous CH<sub>2</sub>Cl<sub>2</sub> (10 mL) was added pyridine (966  $\mu$ L, 12.0 mmol), Bz<sub>2</sub>O (272 mg, 1.2 mmol) and a catalytic amount of DMAP (2.9 mg, 0.02 mmol). The reaction mixture was refluxed overnight, quenched with CH<sub>3</sub>OH (500  $\mu$ L) and stirred for another 30 min. After removal of the solvent, the residue was dissolved in EtOAc (60 mL), washed with 0.1 N HCl (30 mL), saturated aqueous NaHCO<sub>3</sub> solution (20 mL) and brine (20 mL). The organic layer was dried over Na<sub>2</sub>SO<sub>4</sub>, filtered, and concentrated to give a crude residue, which was purified by column chromatography on silica gel (petroleum ether/acetone, 3:1) to afford **10** (583 mg, 97%) as white foam.  $R_f$  = 0.58 (petroleum ether/ethyl acetate, 1.5:1);  $[\alpha]_D^{30}$  +22.0 (*c* 0.6, CH<sub>2</sub>Cl<sub>2</sub>); <sup>1</sup>H NMR (600 MHz, CDCl<sub>3</sub>)  $\delta$  8.02 – 8.01 (m, 2H, Ar), 7.99 – 7.96 (m, 6H, Ar), 7.94 – 7.91 (m, 6H, Ar), 7.57 (t, *J* = 7.4 Hz, 2H, Ar), 7.51 (t, *J* = 7.4 Hz, 1H, Ar), 7.44 – 7.37 (m, 12H, Ar), 7.36 – 7.31 (m, 4H, Ar), 7.29 – 7.07 (m, 44H, Ar), 7.04 (d, *J* = 8.0 Hz, 2H, Ar), 5.61 – 5.58 (m, 3H, H-3<sup>e,g</sup>, H-1<sup>a</sup>), 5.56 (t, *J* = 1.9 Hz, 1H, H-2<sup>a</sup>), 5.38 (d, *J* = 1.4 Hz, 1H, H-2<sup>b</sup>), 5.36 – 5.36 (m, 2H, H-1<sup>d,e</sup>), 5.34 (d, *J* = 2.0 Hz, 1H, H-2<sup>c</sup>), 5.26 (s, 1H, H-1<sup>c</sup>), 5.22 (d, *J* = 4.4 Hz, 1H, H-1<sup>s</sup>), 5.20 (s, 1H, H-1<sup>b</sup>), 5.15 (s, 1H, H-1<sup>f</sup>), 4.75 (d, *J* = 11.9 Hz, 1H, PhCH<sub>2</sub>), 4.72 (dd, *J* = 11.7 Hz, 4.6 Hz, 1H,

H-5<sup>e</sup>), 4.70 – 4.66 (m, 2H, H-5<sup>g</sup>, PhCH<sub>2</sub>), 4.63 – 4.48 (m, 8H, PhCH<sub>2</sub>, H-4<sup>a</sup>), 4.46 – 4.36 (m, 11H, PhCH<sub>2</sub>, H-2<sup>d,f</sup>, H-3<sup>c</sup>, H-5<sup>e,g</sup>), 4.34 (d, *J* = 11.9 Hz, 1H, PhCH<sub>2</sub>), 4.30 – 4.23 (m, 5H, H-2<sup>e</sup>, H-3<sup>a</sup>, H-4<sup>e,f,g</sup>), 4.21 – 4.16 (m, 4H, H-2<sup>g</sup>, H-4<sup>b,c,d</sup>), 4.05 – 3.98 (m, 4H, H-3<sup>b,d,f</sup>, H-5<sup>c</sup>), 3.93 (dd, *J* = 11.4, 4.0 Hz, 1H, H-5<sup>a</sup>), 3.81 (dd, *J* = 11.5, 4.6 Hz, 1H, H-5<sup>d</sup>), 3.74 (dd, *J* = 11.6, 2.0 Hz, 1H, H-5<sup>c</sup>), 3.71 (dd, *J* = 11.4, 4.1 Hz, 1H, H-5<sup>a</sup>), 3.64 (dd, *J* = 11.5, 4.0 Hz, 1H, H-5<sup>d</sup>), 3.54 – 3.46 (m, 4H, H-5<sup>b,f</sup>), 2.26 (s, 3H, tolyl CH<sub>3</sub>); <sup>13</sup>C NMR (150 MHz, CDCl<sub>3</sub>) δ 166.19 (C=O), 166.16 (C=O), 165.86 (C=O), 165.79 (C=O), 165.77 (C=O), 165.53 (C=O), 165.36 (C=O), 138.25 (Ar), 138.22 (Ar), 138.06 (Ar), 137.98 (Ar), 137.75 (Ar), 137.71 (Ar), 137.63 (Ar), 137.52 (Ar), 133.54 (Ar), 133.49 (Ar), 133.47 (Ar), 133.44 (Ar), 133.05 (Ar), 133.01 (Ar), 132.53 (Ar), 130.70 (Ar), 129.98 (Ar), 129.95 (Ar), 129.92 (Ar), 129.87 (Ar), 129.82 (Ar), 129.55 (Ar), 129.50 (Ar), 129.46 (Ar), 128.61 (Ar), 128.59 (Ar), 128.56 (Ar), 128.55 (Ar), 128.53 (Ar), 128.49 (Ar), 128.42 (Ar), 128.39 (Ar), 128.36 (Ar), 128.32 (Ar), 128.26 (Ar), 128.04 (Ar), 127.99 (Ar), 127.89 (Ar), 127.88 (Ar), 127.84 (Ar), 127.80 (Ar), 127.78 (Ar), 127.66 (Ar), 127.61 (Ar), 127.49 (Ar), 106.55 (C-1<sup>f</sup>), 106.33 (C-1<sup>b</sup>), 106.14 (C-1<sup>c</sup>), 106.06 (C-1<sup>d</sup>), 100.98 (C-1<sup>g</sup>), 100.62 (C-1<sup>e</sup>), 91.51 (C-1<sup>a</sup>), 86.94 (C-2<sup>f</sup>), 86.12 (C-2<sup>d</sup>), 84.43 (C-3<sup>d</sup>), 84.06 (×2, C-2<sup>c</sup>, C-3<sup>f</sup>), 83.53 (C-3<sup>b</sup>), 83.13, 82.42 (C-2<sup>a</sup>), 82.00, 81.96, 81.93, 81.86, 81.73, 81.61, 81.54, 81.48, 81.25 (C-3<sup>c</sup>), 79.26 (C-4<sup>e</sup>), 79.22 (C-4<sup>g</sup>), 77.88 (C-3<sup>e</sup>), 77.81 (C-3<sup>g</sup>), 73.42 (PhCH<sub>2</sub>), 73.38 (PhCH<sub>2</sub>), 72.54 (PhCH<sub>2</sub>), 72.49 (PhCH<sub>2</sub>), 72.41 (PhCH<sub>2</sub>), 72.38 (PhCH<sub>2</sub>), 72.35 (PhCH<sub>2</sub>), 72.18 (PhCH<sub>2</sub>), 69.93 (C-5<sup>f</sup>), 69.81 (C-5<sup>b</sup>), 66.58 (C-5<sup>e</sup>), 66.47 (C-5<sup>g</sup>), 65.95 (C-5<sup>d</sup>), 65.56 (C-5<sup>a</sup>), 65.30 (C-5<sup>c</sup>), 21.21 (tolyl CH<sub>3</sub>); HRMS (ESI) Calcd for C<sub>147</sub>H<sub>140</sub>O<sub>35</sub>SNa<sub>2</sub> [M + 2Na]<sup>2+</sup>: 1271.4340, found: 1271.4376.





ether/acetone, 1.7:1) to afford **3** (76.8 mg, 70%) as white foam.  $R_f = 0.36$  (petroleum ether/acetone, 1.3:1);  $[\alpha]_D^{30} +69.8$  ( $c$  0.6,  $\text{CH}_2\text{Cl}_2$ );  $^1\text{H NMR}$  (600 MHz,  $\text{CDCl}_3$ )  $\delta$  8.03 – 7.89 (m, 62H, Ar), 7.57 – 7.06 (m, 257H, Ar), 5.614 (s, 1H, H-1 $\alpha$ ), 5.608 – 5.57 (m, 4H, H-3), 5.57 (t,  $J = 2.0$  Hz, 1H, H-2), 5.45 (s, 1H, H-1 $\alpha$ ), 5.40 (d,  $J = 1.1$  Hz, 2H, H-2), 5.38 (br s, 2H, H-2), 5.36 – 5.29 (m, 22H, H-1 $\alpha$   $\times$ 2, H-1 $\beta$   $\times$ 2, H-2  $\times$ 18), 5.28 (s, 1H, H-1 $\alpha$ ), 5.24 (s, 1H, H-1 $\alpha$ ), 5.23 (s, 1H, H-1 $\alpha$ ), 5.22 (s, 1H, H-1 $\alpha$ ), 5.22 – 5.19 (m, 15H, H-1 $\alpha$   $\times$ 13, H-1 $\beta$   $\times$ 2), 5.16 (s, 1H, H-1 $\alpha$ ), 5.14 (br s, 3H, H-1 $\alpha$ ), 5.12 (s, 1H, H-1 $\alpha$ ), 5.11 (s, 1H, H-1 $\alpha$ ), 4.77 (d,  $J = 11.8$  Hz, 1H,  $\text{PhCH}_2$ ), 4.72 – 3.45 (m, 191H), 5.27 (s, 3H, tolyl  $\text{CH}_3$ );  $^{13}\text{C NMR}$  (150 MHz,  $\text{CDCl}_3$ )  $\delta$  166.17 (C=O), 166.14 (C=O), 165.84 (C=O), 165.77 (C=O), 165.74 (C=O), 165.55 (C=O), 165.44 (C=O), 165.42 (C=O), 165.38 (C=O), 165.36 (C=O), 165.29 (C=O), 165.26 (C=O), 165.24 (C=O), 165.20 (C=O), 138.24 (Ar), 138.21 (Ar), 138.05 (Ar), 138.03 (Ar), 138.00 (Ar), 137.98 (Ar), 137.96 (Ar), 137.92 (Ar), 137.75 (Ar), 137.68 (Ar), 137.62 (Ar), 137.50 (Ar), 133.54 (Ar), 133.50 (Ar), 133.48 (Ar), 133.39 (Ar), 133.32 (Ar), 133.27 (Ar), 133.23 (Ar), 133.20 (Ar), 133.04 (Ar), 133.00 (Ar), 132.56 (Ar), 130.70 (Ar), 129.98 (Ar), 129.92 (Ar), 129.85 (Ar), 129.82 (Ar), 129.71 (Ar), 129.69 (Ar), 129.66 (Ar), 129.63 (Ar), 129.58 (Ar), 129.51 (Ar), 129.49 (Ar), 129.45 (Ar), 129.44 (Ar), 128.62 (Ar), 128.58 (Ar), 128.54 (Ar), 128.48 (Ar), 128.42 (Ar), 128.36 (Ar), 128.34 (Ar), 128.30 (Ar), 128.25 (Ar), 128.02 (Ar), 128.01 (Ar), 127.88 (Ar), 127.85 (Ar), 127.82 (Ar), 127.79 (Ar), 127.76 (Ar), 127.74 (Ar), 127.71 (Ar), 127.70 (Ar), 127.66 (Ar), 127.63 (Ar), 127.60 (Ar), 127.56 (Ar), 127.48 (Ar), 106.52 (C-1), 106.47 (C-1), 106.25 (C-1), 106.15 (C-1), 106.10 (C-1), 105.37 (C-1), 100.96 ( $\times$ 2, C-1 $\beta$ ), 100.60 ( $\times$ 2, C-1 $\beta$ ), 91.50 (C-1), 86.92, 86.07, 84.4, 84.12, 84.04, 83.35, 83.28, 83.23, 83.17, 83.12, 83.05, 82.94, 82.50, 82.45, 82.18, 82.12, 82.08, 82.03, 81.97, 81.91, 81.81, 81.75, 81.72, 81.69, 81.59, 81.58, 81.48, 81.24, 80.16, 79.24, 79.20, 77.88, 77.79, 73.41, 73.37, 72.54, 72.47, 72.37, 72.35, 72.30, 72.26, 72.16, 72.12, 72.05, 72.03, 71.90, 69.92, 69.82, 66.54, 66.45, 65.81, 65.79, 65.69, 65.55, 65.47, 65.43, 65.25, 65.14, 65.12, 65.09, 21.21 (tolyl  $\text{CH}_3$ ); MALDI-TOF MS Calcd for  $\text{C}_{603}\text{H}_{572}\text{O}_{155}\text{SNa}$   $[\text{M} + \text{Na}]^+$   $m/z$ : 10354.0, found: 10352.4.







ether/acetone, 1.8:1) to give a crude product, which was further purified by size exclusion chromatography (Bio-Beads S-X1, toluene/ethyl acetate, 1:1) to afford **33** (71.4 mg, 65%) as white foam.  $R_f = 0.39$  (petroleum ether/acetone, 1.3:1);  $[\alpha]_D^{30} +64.5$  ( $c$  0.7,  $\text{CH}_2\text{Cl}_2$ );  $^1\text{H NMR}$  (600 MHz,  $\text{CDCl}_3$ )  $\delta$  8.04 – 7.89 (m, 62H, Ar), 7.57 – 7.06 (m, 253H, Ar), 5.61 – 5.57 (m, 4H, H-3), 5.45 (s, 1H, H-1 $\alpha$ ), 5.42 (d,  $J = 1.3$  Hz, 1H, H-2), 5.40 (s, 1H, H-2), 5.38 – 5.37 (m, 3H, H-2), 5.36 – 5.29 (m, 22H, H-1 $\alpha$   $\times$ 2, H-1 $\beta$   $\times$ 2, H-2  $\times$ 18), 5.28 (s, 1H, H-1 $\alpha$ ), 5.26 (s, 1H, H-1 $\alpha$ ), 5.23 (br s, 2H, H-1 $\alpha$ ), 5.21 – 5.19 (m, 15H, H-1 $\alpha$   $\times$ 13, H-1 $\beta$   $\times$ 2), 5.16 (s, 1H, H-1 $\alpha$ ), 5.14 (br s, 3H, H-1 $\alpha$ ), 5.13 (s, 1H, H-1 $\alpha$ ), 5.12 (s, 1H, H-1 $\alpha$ ), 5.10 (s, 1H, H-1 $\alpha$ ), 4.77 (d,  $J = 12.1$  Hz, 1H,  $\text{PhCH}_2$ ), 4.71 – 3.43 (m, 193H), 1.63 – 1.58 (m, 2H, octyl  $\text{CH}_2$ ), 1.34 – 1.25 (m, 10H, octyl  $\text{CH}_2$ ), 0.86 (t,  $J = 6.9$  Hz, 3H, octyl  $\text{CH}_3$ );  $^{13}\text{C NMR}$  (150 MHz,  $\text{CDCl}_3$ )  $\delta$  166.17 (C=O), 166.15 (C=O), 165.85 (C=O), 165.78 (C=O), 165.75 (C=O), 165.67 (C=O), 165.43 (C=O), 165.39 (C=O), 165.36 (C=O), 165.30, 165.27 (C=O), 165.25 (C=O), 165.21 (C=O), 138.25 (Ar), 138.22 (Ar), 138.06 (Ar), 138.04 (Ar), 138.01 (Ar), 137.99 (Ar), 137.97 (Ar), 137.96 (Ar), 137.93 (Ar), 137.76 (Ar), 137.69 (Ar), 137.51 (Ar), 133.54 (Ar), 133.50 (Ar), 133.39 (Ar), 133.32 (Ar), 133.28 (Ar), 133.24 (Ar), 133.21 (Ar), 133.05 (Ar), 133.00 (Ar), 130.00 (Ar), 129.93 (Ar), 129.86 (Ar), 129.72 (Ar), 129.64 (Ar), 129.59 (Ar), 129.56 (Ar), 129.50 (Ar), 129.46 (Ar), 129.45 (Ar), 128.63 (Ar), 128.59 (Ar), 128.57 (Ar), 128.55 (Ar), 128.49 (Ar), 128.46 (Ar), 128.43 (Ar), 128.37 (Ar), 128.34 (Ar), 128.31 (Ar), 128.25 (Ar), 128.03 (Ar), 127.99 (Ar), 127.89 (Ar), 127.86 (Ar), 127.84 (Ar), 127.80 (Ar), 127.77 (Ar), 127.71 (Ar), 127.67 (Ar), 127.64 (Ar), 127.60 (Ar), 127.56 (Ar), 127.48 (Ar), 106.53 (C-1), 106.48 (C-1), 106.26 (C-1), 106.16 (C-1), 106.11 (C-1), 106.08 (C-1), 105.38 (C-1), 100.97 ( $\times$ 2, C-1 $\beta$ ), 100.61 ( $\times$ 2, C-1 $\beta$ ), 86.93, 86.08, 84.46, 84.12, 84.05, 83.44, 83.35, 83.33, 83.30, 83.22, 83.17, 83.06, 82.95, 82.51, 82.43, 82.36, 82.24, 82.19, 82.13, 82.08, 82.04, 81.97, 81.92, 81.82, 81.73, 81.69, 81.60, 81.59, 81.48, 81.25, 80.17, 79.25, 79.21, 77.89, 77.80, 73.42, 73.38, 72.47, 72.38, 72.36, 72.27, 72.17, 72.13, 72.06, 72.04, 71.91, 69.93, 69.83, 67.73 (octyl  $\text{OCH}_2$ ), 66.55, 66.46, 65.82, 65.79, 65.71, 65.56, 65.52, 65.43, 65.25, 65.16, 65.13, 31.97 (octyl  $\text{CH}_2$ ), 29.58 (octyl  $\text{CH}_2$ ), 29.53 (octyl  $\text{OCH}_2\text{CH}_2$ ), 29.39 (octyl  $\text{CH}_2$ ), 26.20 (octyl  $\text{CH}_2$ ), 22.79 (octyl  $\text{CH}_2$ ), 14.25



CH<sub>3</sub>OH) to adjust pH to ~10, the reaction mixture was stirred for 24 h at room temperature, and neutralized by the addition of Dowex<sup>®</sup>50WX4 ion-exchange resin. The solution was filtered and concentrated. Purification by size exclusion chromatography (Bio-Beads S-X1, ethyl acetate as eluent) gave a residue, which was dissolved in a mixture of EtOAc/THF/1-PrOH/H<sub>2</sub>O (9 mL, 2:1:1:1) with Pd/C (150 mg, 10% Pd content). The resulting solution was stirred under an atmosphere of hydrogen (0.4 MPa) for 40 h at room temperature, filtered through Celite, and concentrated to give a crude product, which was purified by gel filtration (Sephadex LH-20, CH<sub>3</sub>OH/H<sub>2</sub>O, 1:1) to afford **34** (11.9 mg, 83% for two steps) as glassy solid. <sup>1</sup>H NMR (600 MHz, D<sub>2</sub>O) δ 5.24 (d, *J* = 1.5 Hz, 2H, H-1α), 5.17 – 5.16 (m, 3H, H-1α), 5.140 (d, *J* = 4.5 Hz, 2H, H-1β), 5.136 (d, *J* = 4.5 Hz, 2H, H-1β), 5.11 (br s, 3H, H-1α), 5.08 (br s, 18H, H-1α), 5.01 (d, *J* = 1.8 Hz, 1H, H-1α), 4.31 – 3.69 (m, 156H), 3.57 (dt, *J* = 9.9, 6.5 Hz, 1H, octyl OCH<sub>2</sub>), 1.61 – 1.57 (m, 2H, octyl CH<sub>2</sub>), 1.34 – 1.24 (m, 10H, octyl CH<sub>2</sub>), 0.86 (t, *J* = 6.8 Hz, 3H, octyl CH<sub>3</sub>); <sup>13</sup>C NMR (150 MHz, D<sub>2</sub>O) δ 108.34, 108.29, 108.24, 108.04, 107.94, 106.48, 106.33, 101.59 (×2, C-1β), 101.46 (×2, C-1β), 87.92, 87.64, 83.73, 83.66, 83.33, 83.23, 83.17, 83.03, 83.00, 82.84, 82.82, 82.59, 82.51, 82.49, 81.93, 81.68, 81.64, 79.94, 79.86, 77.62, 77.56, 77.40, 77.31, 77.09, 75.66, 75.57, 74.99, 74.94, 69.45, 67.70, 67.62, 67.44, 67.25, 67.10, 67.02, 63.80, 63.76, 61.42, 61.40, 31.92 (octyl CH<sub>2</sub>), 29.43 (octyl CH<sub>2</sub>), 29.22 (octyl CH<sub>2</sub>), 29.17 (octyl CH<sub>2</sub>), 25.99 (octyl CH<sub>2</sub>), 22.84 (octyl CH<sub>2</sub>), 14.26 (octyl CH<sub>3</sub>); MALDI-TOF MS Calcd for C<sub>163</sub>H<sub>266</sub>O<sub>125</sub>Na [M + Na]<sup>+</sup> monoisotopic *m/z*: 4246.4, found: 4246.3, for C<sub>163</sub>H<sub>266</sub>O<sub>125</sub>K [M + K]<sup>+</sup> monoisotopic *m/z*: 4262.4, found: 4262.2.

## Assembly of arabinogalactan 1:

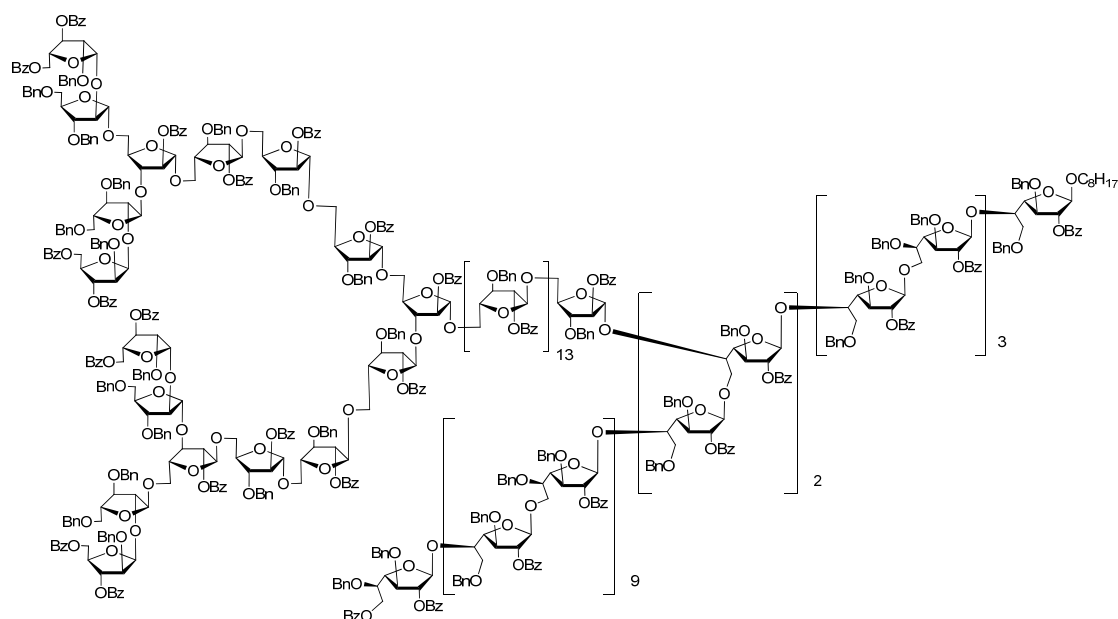

**Fully protected 92mer (35):** A mixture of **3** (76.8 mg, 7.45  $\mu\text{mol}$ ), **2** (20.0 mg, 1.49  $\mu\text{mol}$ ), BSM (2.4 mg, 11.18  $\mu\text{mol}$ ) and freshly activated 4 Å molecular sieves (200 mg) in anhydrous  $\text{CH}_2\text{Cl}_2$  (2 mL) under argon atmosphere was stirred for 20 min at room temperature, and cooled to  $-40\text{ }^\circ\text{C}$ . 5 min later,  $\text{Tf}_2\text{O}$  (1.9  $\mu\text{L}$ , 11.18  $\mu\text{mol}$ ) was added. The resulting mixture was stirred at  $-40\text{ }^\circ\text{C}$  for 10 h, quenched with  $\text{Et}_3\text{N}$  (20  $\mu\text{L}$ ) and filtered through Celite. After removal of the solvent, the desired product was purified by column chromatography on silica gel (petroleum ether/acetone, 1.3:1) to afford **35** (42.5 mg, 84%) as white foam.  $R_f = 0.24$  (petroleum ether/acetone, 1.2:1);  $[\alpha]_D^{30} +4.6$  ( $c$  0.3,  $\text{CH}_2\text{Cl}_2$ );  $^1\text{H NMR}$  (600 MHz,  $\text{CDCl}_3$ )  $\delta$  8.01 – 7.82 (m, 186H, Ar), 7.57 – 6.93 (m, 889H, Ar), 5.62 (s, 1H), 5.61 – 5.45 (m, 39H), 5.40 – 5.01 (m, 135H), 4.98 (s, 1H), 4.72 – 3.47 (m, 651H), 3.41 (dt,  $J = 9.6, 6.6$  Hz, 1H, octyl  $\text{OCH}_2$ ), 1.58 – 1.54 (m, 2H, octyl  $\text{CH}_2$ ), 1.26 – 1.23 (m, 10H, octyl  $\text{CH}_2$ ), 0.85 (t,  $J = 6.8$  Hz, 3H, octyl  $\text{CH}_3$ );  $^{13}\text{C NMR}$  (150 MHz,  $\text{CDCl}_3$ )  $\delta$  166.19 (C=O), 166.16 (C=O), 165.85 (C=O), 165.79 (C=O), 165.75 (C=O), 165.68 (C=O), 165.55 (C=O), 165.50 (C=O), 165.45 (C=O), 165.43 (C=O), 165.42 (C=O), 165.39 (C=O), 165.37 (C=O), 165.33 (C=O), 165.31 (C=O), 165.28 (C=O), 165.25 (C=O), 165.22 (C=O), 138.51 (Ar), 138.48 (Ar), 138.45 (Ar), 138.43 (Ar), 138.25 (Ar), 138.21 (Ar), 138.17 (Ar), 138.16 (Ar), 138.14 (Ar), 138.09 (Ar), 138.05 (Ar), 138.04 (Ar), 137.99 (Ar), 137.97 (Ar), 137.93 (Ar), 137.88 (Ar), 137.87 (Ar), 137.80 (Ar), 137.76 (Ar), 137.69 (Ar), 137.63

(Ar), 137.51 (Ar), 133.55 (Ar), 133.51 (Ar), 133.40 (Ar), 133.35 (Ar), 133.24 (Ar), 133.05 (Ar), 133.01 (Ar), 129.93 (Ar), 129.86 (Ar), 129.70 (Ar), 129.64 (Ar), 129.59 (Ar), 129.57 (Ar), 129.52 (Ar), 129.51 (Ar), 129.46 (Ar), 129.45 (Ar), 128.63 (Ar), 128.59 (Ar), 128.57 (Ar), 128.49 (Ar), 128.42 (Ar), 128.37 (Ar), 128.30 (Ar), 128.25 (Ar), 128.20 (Ar), 128.15 (Ar), 128.12 (Ar), 128.09 (Ar), 128.06 (Ar), 128.04 (Ar), 127.94 (Ar), 127.90 (Ar), 127.87 (Ar), 127.84 (Ar), 127.79 (Ar), 127.77 (Ar), 127.75 (Ar), 127.71 (Ar), 127.67 (Ar), 127.61 (Ar), 127.56 (Ar), 127.53 (Ar), 127.49 (Ar), 127.45 (Ar), 127.40, (Ar) 107.04 (C-1), 106.92 (C-1), 106.74 (C-1), 106.63 (C-1), 106.58 (C-1), 106.53 (C-1), 106.48 (C-1), 106.26 (C-1), 106.16 (C-1), 106.11 (C-1), 106.00 (C-1), 105.38 (C-1), 100.97 (C-1 <sup>$\beta$ -Araf</sup>  $\times 4$ ), 100.61 (C-1 <sup>$\beta$ -Araf</sup>  $\times 4$ ), 86.92, 86.08, 84.46, 84.12, 84.05, 83.91, 83.85, 83.70, 83.56, 83.33, 83.25, 83.14, 83.06, 82.96, 82.77, 82.47, 82.42, 82.23, 82.18, 82.08, 82.04, 82.02, 81.98, 81.91, 81.82, 81.79, 81.73, 81.70, 81.59, 81.48, 81.26, 80.17, 79.25, 79.21, 77.89, 77.80, 75.91, 74.23, 73.98, 73.93, 73.90, 73.83, 73.75, 73.69, 73.49, 73.42, 73.38, 73.33, 73.17, 73.13, 73.04, 72.90, 73.82, 72.72, 72.67, 72.48, 72.38, 72.36, 72.27, 72.16, 72.07, 71.91, 71.81, 71.78, 71.61, 71.56, 71.05, 69.93, 69.83, 69.55, 67.63 (octyl OCH<sub>2</sub>), 66.55, 66.46, 65.82, 65.80, 65.72, 65.70, 65.56, 65.49, 65.41, 65.31, 65.26, 65.16, 65.13, 65.10, 64.93, 31.98 (octyl CH<sub>2</sub>), 29.58 (octyl CH<sub>2</sub>), 29.55 (octyl OCH<sub>2</sub>CH<sub>2</sub>), 29.39 (octyl CH<sub>2</sub>), 26.23 (octyl CH<sub>2</sub>), 22.80 (octyl CH<sub>2</sub>), 14.25 (octyl CH<sub>3</sub>); MALDI-TOF MS Calcd for C<sub>2003</sub>H<sub>1918</sub>O<sub>492</sub>Na [M + Na]<sup>+</sup> *m/z*: 33885.4, found: 33884.7.

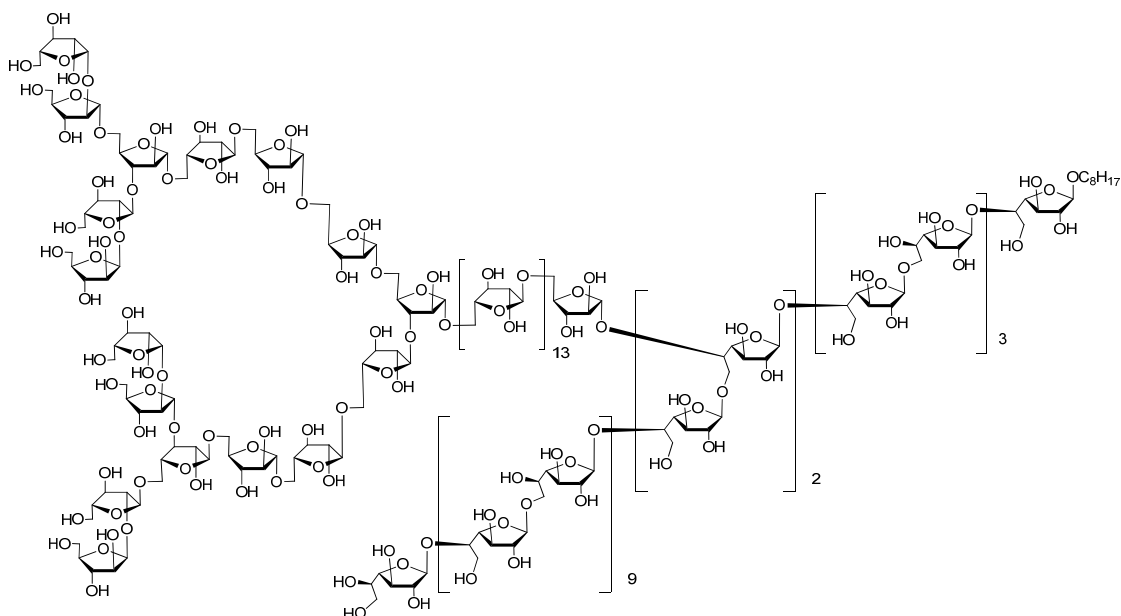

**Deprotected 92mer (1):** The global deprotection was started with 45.0 mg of fully protected **35**, which was divided into 3 portions (15.0 mg each portion) to carry out 3 individual reactions. To a solution of **35** (15.0 mg, 0.44  $\mu\text{mol}$ ) in THF (3 mL) and CH<sub>3</sub>OH (6 mL) was added CH<sub>3</sub>ONa (5.0 M in CH<sub>3</sub>OH) to adjust pH to  $\sim 10$ , the reaction mixture was stirred for 24 h at room temperature, and neutralized by the addition of Dowex<sup>®</sup>50WX4 ion-exchange resin. The solution was filtered and concentrated. Purification by size exclusion chromatography (Bio-Beads S-X1, ethyl acetate as eluent) gave a residue, which was dissolved in a mixture of EtOAc/THF/1-PrOH/H<sub>2</sub>O (4 mL, 2:1:1:1) with Pd/C (100 mg, 10% Pd content). The resulting solution was stirred under an atmosphere of hydrogen (0.4 MPa) for 80 h at room temperature, filtered through Celite, and concentrated to give a crude product. This global deprotection process was repeated twice, and the combined crude products were purified by gel filtration (Sephadex LH-20, CH<sub>3</sub>OH/H<sub>2</sub>O, 1:1) to afford **1** (13.1 mg, 75% for two steps) as glassy solid. <sup>1</sup>H NMR (600 MHz, D<sub>2</sub>O)  $\delta$  5.24 – 5.22 (m, 18H), 5.21 (d,  $J = 2.0$  Hz, 1H), 5.17 – 5.16 (m, 6H), 5.139 (d,  $J = 4.6$  Hz, 4H, H-1 <sup>$\beta$ -Araf</sup>), 5.136 (d,  $J = 4.5$  Hz, 4H, H-1 <sup>$\beta$ -Araf</sup>), 5.11 (br s, 6H), 5.08 – 5.07 (m, 38H), 5.01 – 5.00 (m, 14H), 4.96 (d,  $J = 2.1$  Hz, 1H), 4.30 – 3.55 (m, 492H), 1.62 – 1.58 (m, 2H), 1.30 – 1.22 (m, 10H), 0.86 (t,  $J = 6.9$  Hz, 1H). <sup>13</sup>C NMR (600 MHz, D<sub>2</sub>O)  $\delta$  108.70, 108.63, 108.44, 108.35, 108.25, 107.94, 107.91, 107.82, 106.48, 106.33, 101.59 (C-1 <sup>$\beta$ -Araf</sup>  $\times 4$ ), 101.46 (C-1 <sup>$\beta$ -Araf</sup>  $\times 4$ ), 87.92, 87.64, 83.83, 83.72, 83.66, 83.42,



83.34, 83.18, 83.03, 82.83, 82.73, 82.68, 82.59, 82.49, 82.25, 82.14, 82.07, 82.04, 81.97, 81.93, 81.89, 81.84, 81.69, 81.64, 79.94, 79.86, 77.55, 77.50, 77.45, 77.40, 77.32, 77.27, 77.09, 76.78, 76.66, 76.49, 75.66, 75.57, 74.99, 74.94, 71.34, 70.41, 70.34, 70.11, 69.48, 67.70, 67.63, 67.54, 67.44, 67.24, 67.10, 67.03, 63.80, 63.76, 63.63, 61.94, 61.84, 61.42, 61.40, 31.95 (octyl CH<sub>2</sub>), 29.50 (octyl CH<sub>2</sub>), 29.26 (octyl CH<sub>2</sub>), 29.24 (octyl CH<sub>2</sub>), 26.05 (octyl CH<sub>2</sub>), 22.88 (octyl CH<sub>2</sub>), 14.31 (octyl CH<sub>3</sub>). To improve the mass detection sensitivity, the per-acetylation of compound **1** was performed<sup>5</sup>. To a solution of **1** (0.5 mg) in dry pyridine (1 mL) was added Ac<sub>2</sub>O (0.5 mL) and DMAP (0.1 mg), the resulting mixture was stirred at 80 °C for 2 h. After removal of the solvent, the residue was dissolved in EtOAc (5 mL), washed with 0.1 N HCl (3 mL), saturated aqueous NaHCO<sub>3</sub> solution (3 mL) and brine (3 mL), dried over Na<sub>2</sub>SO<sub>4</sub>, filtered, and concentrated to give a crude product, which was directly used for mass detection. MALDI-TOF MS of per-acetylated derivative of **1**: Calcd for C<sub>928</sub>H<sub>1244</sub>O<sub>614</sub>Na [M + Na]<sup>+</sup> *m/z*: 22246.4, found 22240.5.

## Supplementary references

1. Zhu, S.-Y. & Yang, J.-S. Synthesis of tetra- and hexasaccharide fragments corresponding to the *O*-antigenic polysaccharide of *Klebsiella pneumoniae*. *Tetrahedron* **68**, 3795–3802 (2012).
2. Callam, C. S. & Lowary, T. L. Synthesis of methyl 2,3,5-tri-*O*-benzoyl- $\alpha$ -D-arabinofuranoside in the organic laboratory. *J. Chem. Educ.* **78**, 73–74 (2001).
3. Ishiwata, A., Akao, H. & Ito, Y. Stereoselective synthesis of a fragment of mycobacterial arabinan. *Org. Lett.* **8**, 5525–5528 (2006).
4. Schmidt, R. R. & Toepfer, A. Glycosylation with highly reactive glycosyl donors: efficiency of the inverse procedure. *Tetrahedron Lett.* **32**, 3353–3356 (1991).
5. Bhamidi, S. *et al.* Detailed structural and quantitative analysis reveals the spatial organization of the cell walls of *in Vivo* grown *Mycobacterium leprae* and *in Vitro* grown *Mycobacterium tuberculosis*. *J. Biol. Chem.* **286**, 23168–23177 (2011).
